# Supplementary material for: Catalytic asymmetric ring-opening of aminocyclopropanes with oxygen nucleophiles: access to chiral γ-amino acid derivatives
Source: Royal Society of Chemistry journal article supplement (doi:10.1039/d3qo02036c), 2024-01-01
Supplement: d3qo02036c1.pdf [file d3qo02036c1.pdf]

# Catalytic Asymmetric Ring-Opening of Aminocyclopropanes with Oxygen Nucleophiles: Access to Chiral $\gamma$ -Amino Acid Derivatives

Ru-Lin Luo, Xiao-Bing Wang, Ming-Sheng Xie\*, and Hai-Ming Guo\*

State Key Laboratory of Antiviral Drugs, Pingyuan Laboratory, Key Laboratory of Green Chemical Media and Reactions, Ministry of Education, Collaborative Innovation Center of Henan Province for Green Manufacturing of Fine Chemicals, School of Chemistry and Chemical Engineering, Henan Normal University, Xinxiang, Henan 453007, China.

Email: xiemingsheng@htu.edu.cn; ghm@htu.edu.cn.

## Contents

|                                                                                        |           |
|----------------------------------------------------------------------------------------|-----------|
| 1. General information.....                                                            | S2-S2     |
| 2. Synthesis of chiral <b>L6</b> .....                                                 | S3-S3     |
| 3. General procedure for optimization study.....                                       | S4-S5     |
| 4. Catalytic asymmetric ring-opening of aminocyclopropanes with alcohols.....          | S6-S34    |
| 5. Catalytic asymmetric ring-opening of aminocyclopropanes with acids and phenols..... | S35-S48   |
| 6. Catalytic asymmetric ring-opening of aminocyclopropanes with 4-hydroxycoumarins...  | S49-S52   |
| 7. Catalytic asymmetric ring-opening of aminocyclopropanes with 1,3-cyclodiones.....   | S53-S56   |
| 8. X-ray data of <b>3ak</b> .....                                                      | S57-S57   |
| 9. Gram-scale synthesis of <b>3aa</b> .....                                            | S58-S59   |
| 10. Kinetic resolution of <b>1a</b> .....                                              | S60-S61   |
| 11. Ring-opening of <b>3aa</b> .....                                                   | S62-S62   |
| 12. Decarboxylation and ring-opening of <b>3aa</b> .....                               | S63-S65   |
| 13. The transformantions of the <b>3aa</b> .....                                       | S66-S66   |
| 14. The transformantions of the <b>12aa</b> .....                                      | S67-S69   |
| 15. NMR Spectra.....                                                                   | S70-S125  |
| 16. HPLC Spectra.....                                                                  | S126-S178 |
| 17. Reference.....                                                                     | S179-S179 |

## General information

<sup>1</sup>H NMR spectra were recorded on Bruker Avance III HD 600 or Avance 400 MHz spectrometer. Chemical shifts are recorded in ppm relative to tetramethylsilane and with the solvent resonance as the internal standard. Data are reported as follows: chemical shift, multiplicity (s = singlet, d = doublet; t = triplet; q = quartet; sept = septet; m = multiplet; br = broad), coupling constants (Hz), integration. <sup>13</sup>C NMR data were collected on Bruker Avance III HD 150 or Avance 100 MHz spectrometer. Chemical shifts are reported in ppm from the tetramethylsilane with the solvent resonance as internal standard. Enantiomer excesses were determined by chiral HPLC analysis on Chiralcel OD-H/IA/IG/AD-H in comparison with the authentic racemates. Chiral HPLC analysis recorded on Thermo scientific Dionex Ultimate 3000 and Agilent Technologies 1260 Infinity. Optical rotations were reported as follows:  $[\alpha]_D^T$  (c: g/100 mL, in solvent). Optical rotations recorded on Autopol Automatic Polarimeter. HRMS was recorded on an ABI/Sciex QStar Mass Spectrometer (ESI-TOF). CH<sub>2</sub>Cl<sub>2</sub> and MeOH were purchased extra dry solvents. Other solvents used for work-up and purification purposes were purchased in technical grade quality and distilled by rotary evaporator before use. These ligands **L1-5** and **L7-9** were prepared by previous reported methods.<sup>[1-3]</sup> Aminocyclopropanes **1a-1e** were prepared according to literature precedents.<sup>[4-7]</sup>

## Synthesis of chiral L6

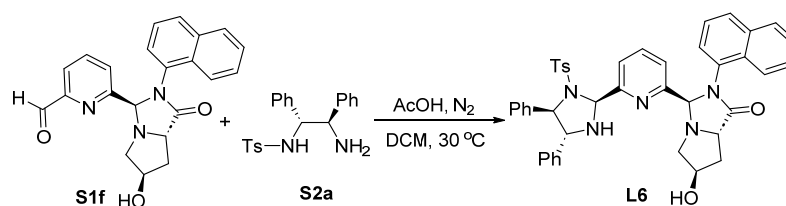

In a round-bottomed flask containing a stir bar, compound **S1f** (1.0 mmol, 373.1 mg), (*R,R*)-TsDPEN **S2a** (1.0 mmol, 366.1 mg), AcOH (1.5 mmol, 85.8  $\mu$ L), and dichloromethane (10.0 mL) were added. Then, the reaction was stirred at 30  $^{\circ}$ C under  $N_2$  for 6 h. After that, the reaction mixture was quenched by aqueous  $NaHCO_3$ . The organic layer was extracted with dichloromethane for 3 times, and the collected organic layer was dried over  $Na_2SO_4$ . After removing the solvent under reduced pressure. Chiral tridentate ligand **L6** can be obtained by recrystallization ( recrystallization solvent: Pet / EtOAc ) as a white solid.

**(3*R*,6*R*,7*aS*)-3-(6-((2*S*,4*R*,5*R*)-4,5-diphenyl-1-tosylimidazolidin-2-yl)pyridin-2-yl)-6-hydroxy-2-(naphthalen-1-yl)hexahydro-1*H*-pyrrolo[1,2-*c*]imidazol-1-one (L6)**

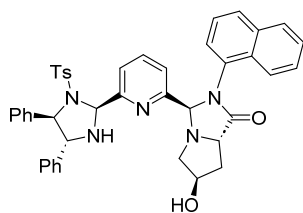

White solid: 569.6 mg, 79% yield; m.p.: 122.0-123.3  $^{\circ}$ C;  $R_f$  = 0.70 ( $CH_2Cl_2/MeOH$ , 25/1, v/v);  $[\alpha]_D^{25} = -27.33$  ( $c = 1.10$ ,  $CHCl_3$ );

**$^1H$  NMR** (600 MHz,  $CDCl_3$ )  $\delta$  7.88 (d,  $J = 7.2$  Hz, 1H), 7.77 (t,  $J = 7.8$  Hz, 1H), 7.73 (d,  $J = 7.8$  Hz, 1H), 7.60 (t,  $J = 8.4$  Hz, 4H), 7.39 - 7.31 (m, 3H), 7.23 - 7.14 (m, 8H), 7.10 - 7.07 (m, 3H), 6.86 (d,  $J = 7.2$  Hz, 3H), 5.70 (s, 1H), 5.62 (s, 1H), 4.62 (dd,  $J = 8.4, 6.0$  Hz, 2H), 4.52 (d,  $J = 6.0$  Hz, 1H), 4.07 (s, 1H), 3.58 (d,  $J = 9.6$  Hz, 3H), 3.34 (d,  $J = 10.2$  Hz, 1H), 2.53 - 2.48 (m, 1H), 2.44 (s, 3H), 2.33 (dd,  $J = 13.8, 9.6$  Hz, 1H), 2.24 (s, 1H).

**$^{13}C$  NMR** (150 MHz,  $CDCl_3$ )  $\delta$  159.0, 157.4, 143.9, 139.6, 139.0, 138.1, 134.4, 133.9, 130.0, 129.6, 128.7, 128.6, 128.4, 128.3, 128.0, 127.6, 127.5, 127.0, 126.94, 126.89, 126.3, 125.5, 123.8, 121.3, 85.7, 77.8, 72.0, 71.8, 69.6, 63.4, 63.2, 37.4, 29.7, 21.6.

**HRMS** (ESI): exact mass calcd for  $C_{43}H_{40}N_5O_4S^+$  ( $M+H$ ) $^+$  requires  $m/z$  722.2796, found  $m/z$  722.2800 ( $\Delta = +4$  ppm).

**IR** (neat) 3062, 2924, 1698, 1451, 1406, 1344, 1161, 1090, 909, 726, 664, 538  $cm^{-1}$ .

## General procedure for optimization study

**Table S1.** Screening of solvents

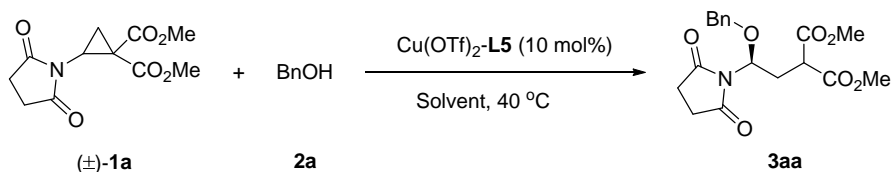

| Entry <sup>a</sup> | Solvent            | Yield [%] <sup>b</sup> | ee [%] <sup>c</sup> |
|--------------------|--------------------|------------------------|---------------------|
| 1                  | DCE                | 32                     | 95                  |
| 2                  | EtOAc              | 24                     | 88                  |
| 3                  | THF                | N.R.                   |                     |
| 4                  | MTBE               | 13                     | 75                  |
| 5                  | Toluene            | 46                     | 78                  |
| 6                  | CH <sub>3</sub> OH | N.R.                   |                     |
| 7                  | CH <sub>3</sub> CN | N.R.                   |                     |

<sup>a</sup>Unless otherwise noted, reactions were carried out with Cu(OTf)<sub>2</sub> (10 mol%), **L5** (11 mol%), **1a** (0.11 mmol), **2a** (0.05 mmol) in solvent (1.0 mL) at 40 °C for 24 h. <sup>b</sup>The yield was determined by <sup>1</sup>H NMR spectra of the crude product. <sup>c</sup>Determined by chiral HPLC analysis. N.R. = No Reaction.

**Table S2.** Screening of other conditions.

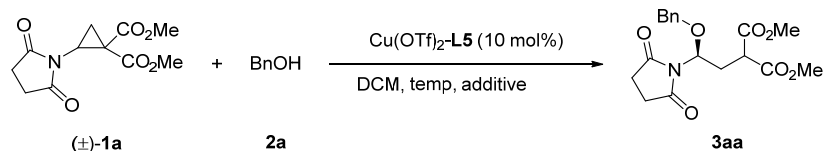

| Entry <sup>a</sup> | Temp [°C] | Additive | Yield [%] <sup>c</sup> | ee [%] <sup>d</sup> |
|--------------------|-----------|----------|------------------------|---------------------|
| 1                  | 30        | /        | 45                     | 90                  |
| 2                  | 40        | /        | 86                     | 93                  |
| 3                  | 50        | /        | 88                     | 88                  |
| 4 <sup>b</sup>     | 40        | 3 Å MS   | 36                     | 95                  |
| 5 <sup>b</sup>     | 40        | 4 Å MS   | 94                     | 94                  |
| 6 <sup>b</sup>     | 40        | 5 Å MS   | 67                     | 87                  |

<sup>a</sup>Unless otherwise noted, reactions were carried out with Cu(OTf)<sub>2</sub> (10 mol%), **L5** (11 mol%), **1a** (0.11 mmol), **2a** (0.05 mmol), MS (5 mg) in solvent (1.0 mL) for 24 h. <sup>b</sup>With MS under N<sub>2</sub>. <sup>c</sup>The yield was determined by <sup>1</sup>H NMR spectra of the crude product. <sup>d</sup>Determined by chiral HPLC analysis.

**Table S3.** Effect of temperature on **Scheme 4b**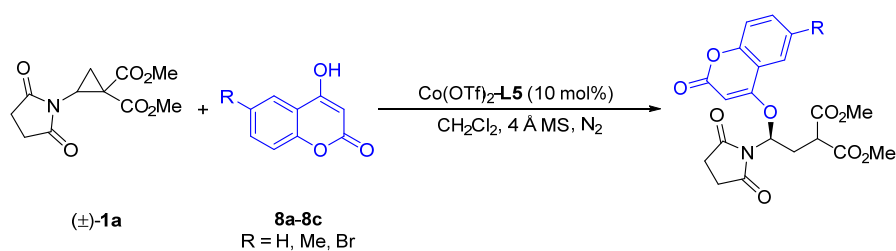

| Entry <sup>a</sup> | <b>8</b>  | Temp [°C] | Time (h) | Yield [%] <sup>b</sup> | ee [%] <sup>c</sup> |
|--------------------|-----------|-----------|----------|------------------------|---------------------|
| 1                  | <b>8a</b> | 25        | 72       | 21                     | 96                  |
| 2                  | <b>8a</b> | 40        | 24       | 95                     | 96                  |
| 3                  | <b>8a</b> | 60        | 3        | 95                     | 93                  |
| 4                  | <b>8b</b> | 40        | 72       | 33                     | 98                  |
| 5                  | <b>8b</b> | 60        | 12       | 82                     | 96                  |
| 6                  | <b>8b</b> | 80        | 10       | 88                     | 94                  |
| 7                  | <b>8c</b> | 40        | 72       | 32                     | 99                  |
| 8                  | <b>8c</b> | 60        | 72       | 60                     | 97                  |
| 9                  | <b>8c</b> | 80        | 8        | 76                     | 97                  |
| 10                 | <b>8c</b> | 100       | 8        | 88                     | 88                  |

<sup>a</sup>Unless otherwise noted, reactions were carried out with Co(OTf)<sub>2</sub> (10 mol%), **L5** (11 mol%), **1a** (0.22 mmol), **2a** (0.10 mmol), 4 Å MS (10 mg) in DCM (2.0 mL). <sup>b</sup>Isolated yields were reported.

<sup>c</sup>Determined by chiral HPLC analysis.

## Catalytic asymmetric ring-opening of aminocyclopropanes with alcohols

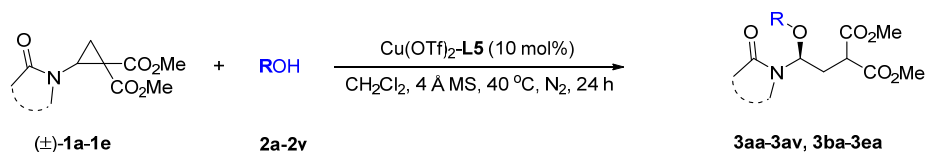

**General method A** - In a dry reaction tube, a mixture of  $\text{Cu(OTf)}_2$  (3.6 mg, 0.01 mmol, 10 mol%), ligand **L5** (7.8 mg, 0.011 mmol, 11 mol%), 4 Å MS (10mg), and aminocyclopropane **1** (0.22 mmol) in DCM (1.0 mL) were stirred at 30 °C for 30 minutes under the atmosphere of nitrogen. Then oxygen nucleophiles substrate **2** (0.1 mmol) in DCM (1.0 mL) was added to the mixture of catalyst via a syringe. Subsequently, the reaction was stirred at -40 °C or 0 °C or 40 °C for 24-240 h. After the reaction was complete (monitored by TLC), the reaction was filtered through a glass funnel within layer of silica gel (100-200 mesh) and purified by flash column chromatography (Pet/EtOAc/MeOH, v/v/v, 10:1:0.1-5:1:0.1; Pet/EtOAc/DCM/MeOH, v/v/v/v, 10:1:1:0.1-5:1:1:0.1; DCM:MeOH, v/v, 100:1-20:1) to give the product **3**.

### Dimethyl (S)-2-(2-(benzyloxy)-2-(2,5-dioxopyrrolidin-1-yl)ethyl)malonate (**3aa**)

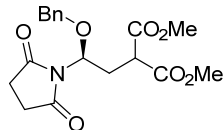

Colorless oil: 33.8 mg, 93% yield, 94% ee;  $R_f = 0.75$  (Pet/EtOAc/MeOH, 1/1/0.1, v/v/v);  $[\alpha]_D^{25} = -1.17$  ( $c = 0.60$ ,  $\text{CHCl}_3$ ); reaction time: 24 h; reaction temperature: 40 °C.

**HPLC** CHIRALPAK IA, n-hexane/2-propanol = 60/40, flow rate 1.0 mL/min,  $\lambda = 254$  nm, retention time: 8.100 min (major), 9.440 min (minor).

**$^1\text{H NMR}$**  (400 MHz,  $\text{CDCl}_3$ )  $\delta$  7.35 - 7.26 (m, 5H), 5.39 (dd,  $J = 8.8, 4.8$  Hz, 1H), 4.64 (d,  $J = 12.8$  Hz, 1H), 4.42 (d,  $J = 12.8$  Hz, 1H), 3.70 (s, 3H), 3.69 (s, 3H), 3.52 (dd,  $J = 8.8, 6.0$  Hz, 1H), 3.05 - 2.97 (m, 1H), 2.41 - 2.34 (m, 5H).

**$^{13}\text{C NMR}$**  (100 MHz,  $\text{CDCl}_3$ )  $\delta$  176.7, 169.1, 169.0, 137.2, 128.5, 128.13, 128.07, 80.3, 72.5, 52.8, 48.3, 31.3, 28.0.

**HRMS** (ESI): exact mass calcd for  $\text{C}_{18}\text{H}_{21}\text{NNaO}_7^+$  ( $\text{M}+\text{Na}$ ) $^+$  requires  $m/z$  386.1210, found  $m/z$  386.1207 ( $\Delta = -3$  ppm).

**IR** (neat): 2919, 1731, 1704, 1436, 1350, 1250, 1199, 1168, 1095, 744, 700, 664  $\text{cm}^{-1}$ .

**Dimethyl (S)-2-(2-(2,5-dioxopyrrolidin-1-yl)-2-((2-methylbenzyl)oxy)ethyl)malonate (3ab)**

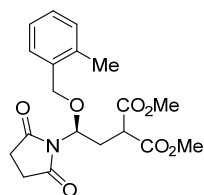

Colorless oil: 35.1 mg, 93% yield, 94% ee;  $R_f = 0.70$  (Pet/EtOAc/MeOH, 1/1/0.1, v/v/v);  $[\alpha]_D^{25} = -8.71$  ( $c = 0.96$ ,  $\text{CHCl}_3$ ); reaction time: 24 h; reaction temperature: 40 °C.

**HPLC** CHIRALPAK IA, n-hexane/2-propanol = 70/30, flow rate 0.8 mL/min,  $\lambda = 254$  nm, retention time: 10.165 min (major), 11.340 min (minor).

**$^1\text{H NMR}$**  (400 MHz,  $\text{CDCl}_3$ )  $\delta$  7.22 - 7.10 (m, 4H), 5.40 (dd,  $J = 8.8, 4.8$  Hz, 1H), 4.62 (d,  $J = 12.4$  Hz, 1H), 4.45 (d,  $J = 12.4$  Hz, 1H), 3.68 (s, 3H), 3.67 (s, 3H), 3.49 (dd,  $J = 8.8, 6.0$  Hz, 1H), 3.01 - 2.93 (m, 1H), 2.44 - 2.33 (m, 5H), 2.31 (s, 3H).

**$^{13}\text{C NMR}$**  (100 MHz,  $\text{CDCl}_3$ )  $\delta$  176.7, 169.1, 169.0, 137.5, 135.0, 130.5, 128.4, 125.7, 80.2, 71.1, 52.8, 48.2, 31.3, 28.0, 19.0.

**HRMS** (ESI): exact mass calcd for  $\text{C}_{19}\text{H}_{23}\text{NNaO}_7^+$  ( $\text{M}+\text{Na}$ ) $^+$  requires  $m/z$  400.1367, found  $m/z$  400.1369 ( $\Delta = +2$  ppm).

**IR (neat)**: 2922, 2852, 1728, 1706, 1463, 1376, 1260, 1163, 1092, 1018, 797, 720  $\text{cm}^{-1}$ .

**Dimethyl (S)-2-(2-(2,5-dioxopyrrolidin-1-yl)-2-((3-methylbenzyl)oxy)ethyl)malonate (3ac)**

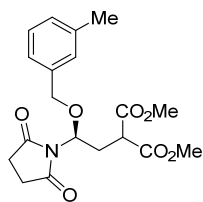

Colorless oil: 30.2 mg, 80% yield, 91% ee;  $R_f = 0.66$  (Pet/EtOAc/MeOH, 1/1/0.1, v/v/v);  $[\alpha]_D^{25} = -1.08$  ( $c = 1.30$ ,  $\text{CHCl}_3$ ); reaction time: 24 h; reaction temperature: 40 °C.

**HPLC** CHIRALPAK IA, n-hexane/2-propanol = 60/40, flow rate 1.0 mL/min,  $\lambda = 254$  nm, retention time: 7.382 min (major), 8.415 min (minor).

**$^1\text{H NMR}$**  (400 MHz,  $\text{CDCl}_3$ )  $\delta$  7.19 (t,  $J = 7.6$  Hz, 1H), 7.09 - 7.05 (m, 3H), 5.37 (dd,  $J = 8.8, 4.8$  Hz, 1H), 4.59 (d,  $J = 12.4$  Hz, 1H), 4.37 (d,  $J = 12.4$  Hz, 1H), 3.70 (s, 3H), 3.68 (s, 3H), 3.52 (dd,  $J = 8.8, 6.0$  Hz, 1H), 3.03 - 2.96 (m, 1H), 2.42 - 2.34 (m, 5H), 2.33 (s, 3H).

**$^{13}\text{C NMR}$**  (100 MHz,  $\text{CDCl}_3$ )  $\delta$  176.7, 169.1, 169.0, 138.1, 137.0, 128.8, 128.4, 125.1, 80.3, 72.6, 52.8, 48.3, 31.3, 28.0, 21.4.

**HRMS** (ESI): exact mass calcd for  $\text{C}_{19}\text{H}_{23}\text{NNaO}_7^+$  ( $\text{M}+\text{Na}$ ) $^+$  requires  $m/z$  400.1367, found  $m/z$  400.1364 ( $\Delta = -3$  ppm).

**IR (neat)**: 2954, 1732, 1704, 1435, 1349, 1250, 1160, 1094, 787, 735, 698  $\text{cm}^{-1}$ .



**Dimethyl (S)-2-(2-(2,5-dioxopyrrolidin-1-yl)-2-((4-methylbenzyl)oxy)ethyl)malonate (3ad)**

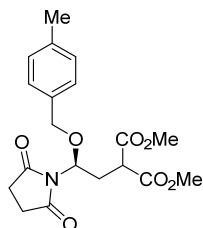

Colorless oil: 30.9 mg, 82% yield, 93% ee;  $R_f = 0.60$  (Pet/EtOAc/MeOH, 1/1/0.1, v/v/v);  $[\alpha]_D^{25} = -15.18$  ( $c = 0.65$ ,  $\text{CHCl}_3$ ); reaction time: 24 h; reaction temperature: 40 °C.

**HPLC** CHIRALPAK IA, n-hexane/2-propanol = 60/40, flow rate 1.0 mL/min,  $\lambda = 254$  nm, retention time: 7.655 min (major), 8.822 min (minor).

**$^1\text{H NMR}$**  (600 MHz,  $\text{CDCl}_3$ )  $\delta$  7.35 (dd,  $J = 7.8$  Hz, 1.8 Hz, 1H), 7.07 (td,  $J = 7.2$  Hz, 1.2 Hz, 1H), 6.68 (t,  $J = 7.8$  Hz, 1H), 6.33 (d,  $J = 7.8$  Hz, 1H), 6.06 – 6.03 (m, 2H), 5.86 (d,  $J = 3.0$  Hz, 1H), 3.81 (s, 3H), 3.64 (s, 3H), 2.88 (dd,  $J = 13.8, 8.4$  Hz, 1H), 2.72 (s, 4H), 2.40 (dd,  $J = 13.2, 6.0$  Hz, 1H).

**$^{13}\text{C NMR}$**  (150 MHz,  $\text{CDCl}_3$ )  $\delta$  176.7, 169.1, 169.0, 137.8, 134.0, 129.1, 128.2, 78.0, 72.2, 52.79, 52.75, 48.2, 31.3, 28.0, 21.2.

**HRMS** (ESI): exact mass calcd for  $\text{C}_{19}\text{H}_{23}\text{NNaO}_7^+$  ( $\text{M}+\text{Na}$ ) $^+$  requires  $m/z$  400.1367, found  $m/z$  400.1363 ( $\Delta = -4$  ppm).

**IR (neat)**: 2958, 1740, 1703, 1437, 1348, 1262, 1160, 1005, 811, 665, 639  $\text{cm}^{-1}$ .

**Dimethyl (S)-2-(2-((4-(tert-butyl)benzyl)oxy)-2-(2,5-dioxopyrrolidin-1-yl)ethyl)malonate (3ae)**

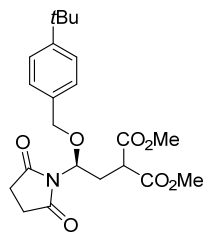

Colorless oil: 36.9 mg, 88% yield, 95% ee;  $R_f = 0.71$  (Pet/EtOAc/MeOH, 1/1/0.1, v/v/v);  $[\alpha]_D^{25} = +3.60$  ( $c = 1.24$ ,  $\text{CHCl}_3$ ); reaction time: 24 h; reaction temperature: 40 °C.

**HPLC** CHIRALPAK IA, n-hexane/2-propanol = 60/40, flow rate 1.0 mL/min,  $\lambda = 254$  nm, retention time: 6.673 min (major), 7.995 min (minor).

**$^1\text{H NMR}$**  (600 MHz,  $\text{CDCl}_3$ )  $\delta$  7.33 (d,  $J = 7.8$  Hz, 2H), 7.22 (d,  $J = 8.4$  Hz, 2H), 5.37 (dd,  $J = 9.0, 4.8$  Hz, 1H), 4.65 (d,  $J = 12.6$  Hz, 1H), 4.37 (d,  $J = 12.6$  Hz, 1H), 3.704 (s, 3H), 3.697 (s, 3H), 3.53 (dd,  $J = 9.0, 6.0$  Hz, 1H), 3.01 - 2.96 (m, 1H), 2.39 - 2.35 (m, 1H), 2.30 (s, 4H), 1.29 (s, 9H).

**$^{13}\text{C NMR}$**  (150 MHz,  $\text{CDCl}_3$ )  $\delta$  176.6, 169.1, 151.2, 134.2, 127.9, 125.4, 80.5, 72.6, 52.8, 48.3, 34.7, 31.42, 31.39, 28.0.

**HRMS** (ESI): exact mass calcd for  $\text{C}_{22}\text{H}_{29}\text{NNaO}_7^+$  ( $\text{M}+\text{Na}$ ) $^+$  requires  $m/z$  442.1836, found  $m/z$  442.1840 ( $\Delta = +4$  ppm).

**IR (neat)**: 2956, 1733, 1705, 1436, 1349, 1250, 1167, 1094, 819, 734, 671  $\text{cm}^{-1}$ .

**Dimethyl (S)-2-(2-(2,5-dioxopyrrolidin-1-yl)-2-((4-methoxybenzyl)oxy)ethyl)malonate (3af)**

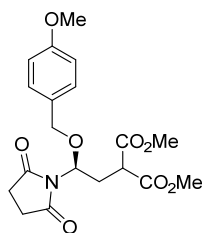

White solid: 32.2 mg, 82% yield, 94% ee; m.p.: 95.2 - 96.6 °C;  $R_f = 0.65$  (Pet/EtOAc/MeOH, 1/1/0.1, v/v/v);  $[\alpha]_D^{25} = -6.93$  ( $c = 1.95$ ,  $\text{CHCl}_3$ ); reaction time: 24 h; reaction temperature: 40 °C.

**HPLC** CHIRALPAK IA, n-hexane/2-propanol = 60/40, flow rate 1.0 mL/min,  $\lambda = 254$  nm, retention time: 9.363 min (major), 11.120 min (minor).

**$^1\text{H NMR}$**  (600 MHz,  $\text{CDCl}_3$ )  $\delta$  7.21 (d,  $J = 8.4$  Hz, 2H), 6.84 (d,  $J = 9.0$  Hz, 2H), 5.35 (dd,  $J = 9.0, 4.8$  Hz, 1H), 4.51 (d,  $J = 12.6$  Hz, 1H), 4.37 (d,  $J = 12.0$  Hz, 1H), 3.78 (s, 3H), 3.69 (s, 3H), 3.67 (s, 3H), 3.49 (dd,  $J = 9.0, 6.0$  Hz, 1H), 2.99 - 2.94 (m, 1H), 2.44 (s, 4H), 2.36 - 2.31 (m, 1H).

**$^{13}\text{C NMR}$**  (150 MHz,  $\text{CDCl}_3$ )  $\delta$  176.7, 169.1, 169.0, 159.6, 129.7, 129.2, 113.9, 79.8, 72.0, 55.4, 52.83, 52.80, 48.2, 31.3, 28.1.

**HRMS** (ESI): exact mass calcd for  $\text{C}_{19}\text{H}_{23}\text{NNaO}_8^+$  ( $\text{M}+\text{K}$ ) $^+$  requires  $m/z$  416.1316, found  $m/z$  416.1312 ( $\Delta = -4$  ppm).

**IR (neat)**: 2954, 1731, 1703, 1436, 1349, 1247, 1170, 1094, 817, 733, 635  $\text{cm}^{-1}$ .

**Dimethyl (S)-2-(2-((4-chlorobenzyl)oxy)-2-(2,5-dioxopyrrolidin-1-yl)ethyl)malonate (3ag)**

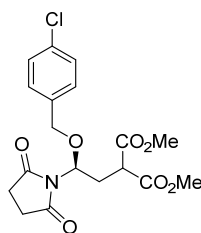

Colorless oil: 29.4 mg, 74% yield, 93% ee;  $R_f = 0.60$  (Pet/EtOAc/MeOH, 1/1/0.1, v/v/v);  $[\alpha]_D^{25} = -17.2$  ( $c = 1.05$ ,  $\text{CHCl}_3$ ); reaction time: 24 h; reaction temperature: 40 °C.

**HPLC** CHIRALPAK IA, n-hexane/2-propanol = 70/30, flow rate 0.8 mL/min,  $\lambda = 254$  nm, retention time: 11.843 min (major), 15.030 min (minor).

**$^1\text{H NMR}$**  (600 MHz,  $\text{CDCl}_3$ )  $\delta$  7.29 (s, 1H), 7.27 - 7.26 (m, 2H), 7.19 - 7.16 (m, 1H), 5.39 (dd,  $J = 9.0$ , 4.8 Hz, 1H), 4.56 (d,  $J = 12.6$  Hz, 1H), 4.41 (d,  $J = 12.6$  Hz, 1H), 3.712 (s, 3H), 3.705 (s, 3H), 3.52 (dd,  $J = 8.4$ , 6.0 Hz, 1H), 3.06 - 3.01 (m, 1H), 2.50 (s, 4H), 2.43 - 2.38 (m, 1H).

**$^{13}\text{C NMR}$**  (150 MHz,  $\text{CDCl}_3$ )  $\delta$  176.6, 169.1, 169.0, 139.2, 134.4, 129.9, 128.2, 127.9, 126.1, 80.3, 71.4, 52.9, 48.3, 31.1, 28.0.

**HRMS** (ESI): exact mass calcd for  $\text{C}_{18}\text{H}_{20}\text{ClNNaO}_7^+$  ( $\text{M}+\text{Na}$ ) $^+$  requires  $m/z$  420.0821, found  $m/z$  420.0824 ( $\Delta = +3$  ppm).

**IR (neat)**: 2922, 1734, 1708, 1458, 1259, 1087, 1015, 864, 794, 702, 662  $\text{cm}^{-1}$ .

**Dimethyl (S)-2-((3-bromobenzyl)oxy)-2-(2,5-dioxopyrrolidin-1-yl)ethylmalonate (3ah)**

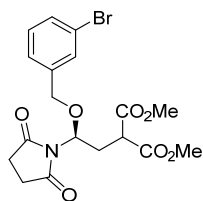

Colorless oil: 31.3 mg, 71% yield, 94% ee;  $R_f = 0.60$  (Pet/EtOAc/MeOH, 1/1/0.1, v/v/v);  $[\alpha]_D^{25} = -1.45$  ( $c = 2.90$ ,  $\text{CHCl}_3$ ); reaction time: 24 h; reaction temperature: 40 °C.

**HPLC** CHIRALPAK IA, n-hexane/2-propanol = 60/40, flow rate 1.0 mL/min,  $\lambda = 254$  nm, retention time: 8.925 min (major), 11.693 min (minor).

**$^1\text{H NMR}$**  (600 MHz,  $\text{CDCl}_3$ )  $\delta$  7.41 (s, 1H), 7.38 (dt,  $J = 7.2, 1.8$  Hz, 1H), 7.39 – 7.37 (m, 2H), 5.35 (dd,  $J = 9.0, 4.8$  Hz, 1H), 4.53 (d,  $J = 12.6$  Hz, 1H), 4.35 (d,  $J = 12.6$  Hz, 1H), 3.68 (s, 3H), 3.67 (s, 3H), 3.49 (dd,  $J = 8.4, 6.0$  Hz, 1H), 3.02 - 2.96 (m, 1H), 2.46 (s, 4H), 2.39 - 2.34 (m, 1H).

**$^{13}\text{C NMR}$**  (150 MHz,  $\text{CDCl}_3$ )  $\delta$  176.6, 169.0, 168.9, 139.4, 131.1, 130.7, 130.1, 126.5, 122.4, 80.2, 71.3, 52.8, 48.2, 31.1, 27.9.

**HRMS** (ESI): exact mass calcd for  $\text{C}_{18}\text{H}_{20}\text{BrNNaO}_7^+$  ( $\text{M}+\text{Na}$ ) $^+$  requires  $m/z$  464.0315, found  $m/z$  464.0314 ( $\Delta = -1$  ppm).

**IR (neat)**: 2873, 1693, 1597, 1570, 1428, 1200, 1069, 1031, 773, 695, 683, 666  $\text{cm}^{-1}$ .

**Dimethyl (S)-2-(2-(2,5-dioxopyrrolidin-1-yl)-2-((4-iodobenzyl)oxy)ethyl)malonate (3ai)**

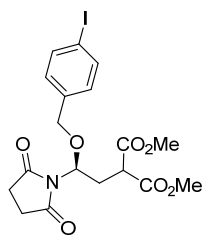

White solid: 40.0 mg, 82% yield, 96% ee; m.p.: 136.5 - 138.2 °C;  $R_f = 0.60$  (Pet/EtOAc/MeOH, 1/1/0.1, v/v/v);  $[\alpha]_D^{25} = -1.40$  ( $c = 0.60$ ,  $\text{CHCl}_3$ ); reaction time: 24 h; reaction temperature: 40 °C.

**HPLC** CHIRALPAK IA, n-hexane/2-propanol = 60/40, flow rate 1.0 mL/min,  $\lambda = 254$  nm, retention time: 10.555 min (major), 13.165 min (minor).

**$^1\text{H NMR}$**  (600 MHz,  $\text{CDCl}_3$ )  $\delta$  7.62 (d,  $J = 7.8$  Hz, 2H), 7.01 (d,  $J = 8.4$  Hz, 2H), 5.31 (dd,  $J = 9.0, 4.2$  Hz, 1H), 4.45 (d,  $J = 12.6$  Hz, 1H), 4.35 (d,  $J = 12.6$  Hz, 1H), 3.66 (s, 3H), 3.64 (s, 3H), 3.45 (dd,  $J = 9.0, 6.0$  Hz, 1H), 2.98 - 2.94 (m, 1H), 2.46 (s, 4H), 2.35 - 2.30 (m, 1H).

**$^{13}\text{C NMR}$**  (150 MHz,  $\text{CDCl}_3$ )  $\delta$  176.6, 168.9, 168.8, 137.5, 136.7, 129.9, 93.6, 79.8, 71.3, 52.81, 52.78, 48.1, 31.0, 28.0.

**HRMS** (ESI): exact mass calcd for  $\text{C}_{18}\text{H}_{20}\text{INNaO}_7^+$  ( $\text{M}+\text{Na}$ ) $^+$  requires  $m/z$  512.0177, found  $m/z$  512.0177 ( $\Delta = 0$  ppm).

**IR** (neat): 2955, 1734, 1702, 1436, 1349, 1197, 1159, 1004, 818, 795, 665  $\text{cm}^{-1}$ .

**Dimethyl (S)-2-(2-(2,5-dioxopyrrolidin-1-yl)-2-((4-(trifluoromethyl)benzyl)oxy)ethyl) malonate**

**(3aj)**

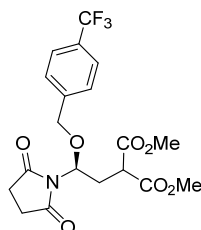

Colorless oil: 38.8 mg, 90% yield, 94% ee;  $R_f = 0.67$  (Pet/EtOAc/MeOH, 10/10/1, v/v/v);  $[\alpha]_D^{25} = -6.00$  ( $c = 1.62$ ,  $\text{CHCl}_3$ ); reaction time: 24 h; reaction temperature: 40 °C.

**HPLC** CHIRALPAK IA, n-hexane/2-propanol = 60/40, flow rate 1.0 mL/min,  $\lambda = 254$  nm, retention time: 8.110 min (major), 9.625 min (minor).

**$^1\text{H NMR}$**  (600 MHz,  $\text{CDCl}_3$ )  $\delta$  7.59 (d,  $J = 7.8$  Hz, 2H), 7.42 (d,  $J = 8.4$  Hz, 2H), 5.39 (dd,  $J = 8.4, 4.8$  Hz, 1H), 4.61 (d,  $J = 13.2$  Hz, 1H), 4.49 (d,  $J = 12.6$  Hz, 1H), 3.70 (s, 3H), 3.67 (s, 3H), 3.50 (dd,  $J = 9.0, 6.0$  Hz, 1H), 3.06 - 3.01 (m, 1H), 2.49 (s, 4H), 2.43 - 2.39 (m, 1H).

**$^{13}\text{C NMR}$**  (150 MHz,  $\text{CDCl}_3$ )  $\delta$  176.7, 169.02, 168.96, 130.4 (q,  $J_{\text{C-F}} = 33.0$  Hz), 128.2, 125.4 (q,  $J_{\text{C-F}} = 3.0$  Hz), 124.1 (q,  $J_{\text{C-F}} = 120.0$  Hz), 80.2, 71.2, 52.89, 52.86, 48.3, 31.1, 28.0.

**HRMS** (ESI): exact mass calcd for  $\text{C}_{19}\text{H}_{20}\text{F}_3\text{NNaO}_7^+$  ( $\text{M}+\text{Na}$ ) $^+$  requires  $m/z$  454.1084, found  $m/z$  454.1086 ( $\Delta = +2$  ppm).

**IR (neat)**: 2921, 1732, 1705, 1436, 1324, 1251, 1161, 1064, 1017, 734, 664, 633  $\text{cm}^{-1}$ .

**Dimethyl (S)-2-(2-(2,5-dioxopyrrolidin-1-yl)-2-((2-iodobenzyl)oxy)ethyl)malonate (3ak)**

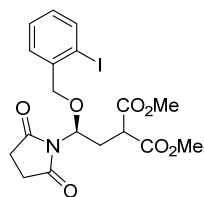

White solid: 41.1 mg, 84% yield, 93% ee; m.p.: 131.2 - 133.5 °C;  $R_f = 0.75$  (Pet/EtOAc/MeOH, 10/10/1, v/v/v);  $[\alpha]_D^{25} = -9.77$  ( $c = 1.60$ ,  $\text{CHCl}_3$ ); reaction time: 24 h; reaction temperature: 40 °C.

**HPLC** CHIRALPAK IA, n-hexane/2-propanol = 60/40, flow rate 1.0 mL/min,  $\lambda = 254$  nm, retention time: 9.208 min (major), 10.617 min (minor).

**$^1\text{H NMR}$**  (400 MHz,  $\text{CDCl}_3$ )  $\delta$  7.80 (dd,  $J = 8.0, 1.2$  Hz, 1H), 7.40 (dd,  $J = 7.6, 2.0$  Hz, 1H), 7.34 (td,  $J = 7.6, 1.2$  Hz, 1H), 6.98 (td,  $J = 7.6, 1.6$  Hz, 1H), 5.46 (dd,  $J = 8.8, 4.8$  Hz, 1H), 4.49 (dd,  $J = 16.8, 12.4$  Hz, 2H), 3.70 (s, 6H), 3.58 (dd,  $J = 8.8, 6.0$  Hz, 1H), 3.10 - 3.03 (m, 1H), 2.64 (s, 4H), 2.49 - 2.42 (m, 5H).

**$^{13}\text{C NMR}$**  (100 MHz,  $\text{CDCl}_3$ )  $\delta$  176.7, 169.1, 169.0, 139.5, 139.2, 129.80, 129.77, 128.4, 98.4, 80.0, 75.4, 52.9, 48.4, 31.1, 28.2.

**HRMS** (ESI): exact mass calcd for  $\text{C}_{18}\text{H}_{20}\text{INNaO}_7^+$  ( $\text{M}+\text{Na}$ ) $^+$  requires  $m/z$  512.0177, found  $m/z$  512.0173 ( $\Delta = -4$  ppm).

**IR (neat)**: 2922, 1730, 1703, 1435, 1347, 1250, 1164, 1012, 754, 733, 662,  $635\text{cm}^{-1}$ .



**Dimethyl (S)-2-(2-((2-(bromomethyl)benzyl)oxy)-2-(2,5-dioxopyrrolidin-1-yl)ethyl) malonate (3al)**

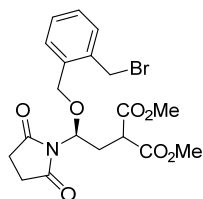

Colorless oil: 39.1 mg, 86% yield, 93% ee;  $R_f = 0.75$  (Pet/EtOAc/MeOH, 1/1/0.1, v/v/v);  $[\alpha]_D^{25} = -23.34$  ( $c = 0.80$ ,  $\text{CHCl}_3$ ); reaction time: 24 h; reaction temperature: 40 °C.

**HPLC** CHIRALPAK IA, n-hexane/2-propanol = 60/40, flow rate 1.0 mL/min,  $\lambda = 254$  nm, retention time: 8.248 min (major), 11.425 min (minor).

**$^1\text{H NMR}$**  (600 MHz,  $\text{CDCl}_3$ )  $\delta$  7.34 - 7.32 (m, 1H), 7.30 - 7.25 (m, 3H), 5.44 (dd,  $J = 9.0, 4.8$  Hz, 1H), 4.67 (t,  $J = 5.4$  Hz, 3H), 7.01 (d,  $J = 10.2$  Hz, 1H), 3.69 (s, 3H), 3.67 (s, 3H), 3.51 (dd,  $J = 8.4, 6.6$  Hz, 1H), 3.03 - 2.98 (m, 1H), 2.52 - 2.49 (m, 4H), 2.42 - 2.37 (m, 1H).

**$^{13}\text{C NMR}$**  (150 MHz,  $\text{CDCl}_3$ )  $\delta$  176.9, 169.02, 168.98, 136.9, 135.7, 130.9, 129.1, 128.9, 80.3, 70.2, 52.84, 52.80, 48.3, 31.7, 31.2, 28.1.

**HRMS** (ESI): exact mass calcd for  $\text{C}_{19}\text{H}_{22}\text{BrNNaO}_7^+$  ( $\text{M}+\text{Na}$ ) $^+$  requires  $m/z$  478.0472, found  $m/z$  478.0476 ( $\Delta = +4$  ppm).

**IR** (neat): 2953, 1731, 1703, 1435, 1348, 1167, 1094, 763, 728, 664, 601  $\text{cm}^{-1}$ .

**Dimethyl (S)-2-(2-(2,5-dioxopyrrolidin-1-yl)-2-((2-ethynylbenzyl)oxy)ethyl)malonate (3am)**

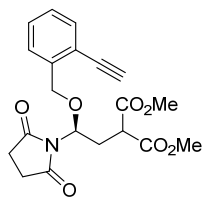

Colorless oil: 30.9 mg, 80% yield, 90% ee;  $R_f = 0.60$  (Pet/EtOAc/MeOH, 1/1/0.1, v/v/v);  $[\alpha]_D^{25} = -20.06$  ( $c = 1.86$ ,  $\text{CHCl}_3$ ); reaction time: 24 h; reaction temperature: 40 °C.

**HPLC** CHIRALPAK IA, n-hexane/2-propanol = 60/40, flow rate 1.0 mL/min,  $\lambda = 254$  nm, retention time: 8.192 min (major), 9.472 min (minor).

**$^1\text{H NMR}$**  (400 MHz,  $\text{CDCl}_3$ )  $\delta$  7.46 (dd,  $J = 7.6, 1.2$  Hz, 1H), 7.42 (dd,  $J = 8.0, 1.6$  Hz, 1H), 7.33 (td,  $J = 8.0, 1.6$  Hz, 1H), 7.23 (td,  $J = 7.6, 1.6$  Hz, 1H), 5.43 (dd,  $J = 8.8, 4.8$  Hz, 1H), 4.66 (s, 2H), 3.681 (s, 3H), 3.679 (s, 3H), 3.57 (dd,  $J = 8.4, 6.0$  Hz, 1H), 3.29 (s, 1H), 3.07 - 2.97 (m, 1H), 2.59 (s, 4H), 2.45 - 2.38 (m, 1H).

**$^{13}\text{C NMR}$**  (100 MHz,  $\text{CDCl}_3$ )  $\delta$  176.6, 169.1, 169.0, 139.2, 132.9, 129.0, 128.4, 127.8, 121.0, 82.2, 81.1, 80.1, 69.7, 52.8, 48.3, 31.2, 28.1.

**HRMS** (ESI): exact mass calcd for  $\text{C}_{20}\text{H}_{21}\text{NNaO}_7^+$  ( $\text{M}+\text{Na}$ ) $^+$  requires  $m/z$  410.1210, found  $m/z$  410.1209 ( $\Delta = -1$  ppm).

**IR (neat)**: 2954, 2359, 2348, 1779, 1705, 1436, 1349, 1291, 1170, 819, 764, 664, 636  $\text{cm}^{-1}$ .

**Dimethyl (S)-2-(2-(2,5-dioxopyrrolidin-1-yl)-2-((3-phenylprop-2-yn-1-yl)oxy)ethyl) malonate (3an)**

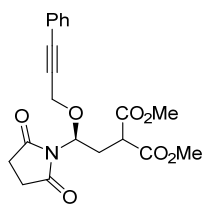

Colorless oil: 33.7 mg, 87% yield, 93% ee;  $R_f = 0.80$  (Pet/EtOAc/MeOH, 1/1/0.1, v/v/v);  $[\alpha]_D^{25} = -11.40$  ( $c = 3.32$ ,  $\text{CHCl}_3$ ); reaction time: 24 h; reaction temperature: 40 °C.

**HPLC** CHIRALPAK IA, n-hexane/2-propanol = 60/40, flow rate 1.0 mL/min,  $\lambda = 254$  nm, retention time: 8.865 min (major), 11.398 min (minor).

**$^1\text{H NMR}$**  (600 MHz,  $\text{CDCl}_3$ )  $\delta$  7.44 - 7.42 (m, 2H), 7.33 - 7.29 (m, 3H), 5.54 (dd,  $J = 9.0, 4.8$  Hz, 1H), 4.45 (d,  $J = 16.2$  Hz, 1H), 4.33 (d,  $J = 16.2$  Hz, 1H), 3.73 (s, 3H), 3.67 (s, 3H), 3.59 (dd,  $J = 9.0, 6.0$  Hz, 1H), 3.05 - 3.00 (m, 1H), 2.60 (s, 4H), 2.45 - 2.41 (m, 1H).

**$^{13}\text{C NMR}$**  (150 MHz,  $\text{CDCl}_3$ )  $\delta$  176.9, 169.13, 169.06, 131.8, 128.6, 122.3, 86.6, 84.2, 80.1, 58.4, 52.91, 52.87, 48.2, 31.2, 28.1.

**HRMS** (ESI): exact mass calcd for  $\text{C}_{20}\text{H}_{21}\text{NNaO}_7^+$  ( $\text{M}+\text{Na}$ ) $^+$  requires  $m/z$  410.1210, found  $m/z$  410.1206 ( $\Delta = -4$  ppm).

**IR** (neat): 2962, 1776, 1703, 1257, 1009, 788, 691, 661  $\text{cm}^{-1}$ .

**Dimethyl (S)-2-(2-(2,5-dioxopyrrolidin-1-yl)-2-((3-(trimethylsilyl)prop-2-yn-1-yl)oxy)ethyl) malonate (3ao)**

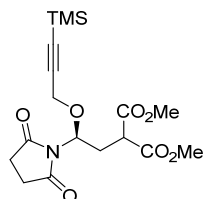

Colorless oli: 32.9 mg, 86% yield, 95% ee;  $R_f = 0.80$  (Pet/EtOAc/MeOH, 1/1/0.1, v/v/v);  $[\alpha]_D^{25} = -11.67$  ( $c = 0.56$ ,  $\text{CHCl}_3$ ); reaction time: 24 h; reaction temperature: 40 °C.

**HPLC** CHIRALPAK IA, n-hexane/2-propanol = 70/30, flow rate 0.8 mL/min,  $\lambda = 254$  nm, retention time: 7.418 min (major), 8.997 min (minor).

**$^1\text{H NMR}$**  (600 MHz,  $\text{CDCl}_3$ )  $\delta$  5.44 - 5.41 (m, 1H), 4.19 (d,  $J = 16.2$  Hz, 1H), 4.08 (d,  $J = 16.2$  Hz, 1H), 3.73 (s, 3H), 3.72 (s, 3H), 3.54 - 3.51 (m, 1H), 2.98 - 2.93 (m, 1H), 2.68 (s, 4H), 2.45 - 2.40 (m, 1H), 0.15 (s, 9H).

**$^{13}\text{C NMR}$**  (150 MHz,  $\text{CDCl}_3$ )  $\delta$  176.6, 169.1, 100.0, 92.0, 80.1, 58.2, 52.91, 52.88, 48.2, 31.1, 28.1, -0.2.

**HRMS** (ESI): exact mass calcd for  $\text{C}_{17}\text{H}_{25}\text{NNaO}_7\text{Si}^+$  ( $\text{M}+\text{Na}$ ) $^+$  requires  $m/z$  406.1292, found  $m/z$  406.1291 ( $\Delta = -1$  ppm).

**IR (neat)**: 2957, 1731, 1708, 1436, 1348, 1249, 1167, 1093, 842, 760, 731, 664, 634  $\text{cm}^{-1}$ .

**Dimethyl (S)-2-(2-(2,5-dioxopyrrolidin-1-yl)-2-ethoxyethyl)malonate (3ap)**

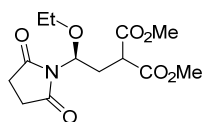

Colorless oli: 26.4 mg, 89% yield, 99% ee;  $R_f = 0.43$  (Pet/EtOAc/MeOH, 2/1/0.1, v/v/v);  $[\alpha]_D^{25} = -8.59$  ( $c = 0.85$ ,  $\text{CHCl}_3$ ); reaction time: 24 h; reaction temperature: 40 °C.

**HPLC** CHIRALPAK IG, n-hexane/2-propanol = 70/30, flow rate 0.8 mL/min,  $\lambda = 254$  nm, retention time: 17.087 min (major), 26.753 min (minor).

**$^1\text{H NMR}$**  (600 MHz,  $\text{CDCl}_3$ )  $\delta$  5.27 (dd,  $J = 8.4, 4.8$  Hz, 1H), 3.73 (s, 3H), 3.71 (s, 3H), 3.52 (dd,  $J = 8.4, 6.6$  Hz, 1H), 3.50 - 3.45 (m, 1H), 3.41 - 3.36 (m, 1H), 2.97 - 2.93 (m, 1H), 2.69 (s, 4H), 2.39 - 2.95 (m, 1H), 1.14 (t,  $J = 7.2$  Hz, 3H).

**$^{13}\text{C NMR}$**  (150 MHz,  $\text{CDCl}_3$ )  $\delta$  176.8, 169.1, 80.0, 65.1, 52.83, 52.81, 48.4, 31.1, 28.1, 14.8.

**HRMS** (ESI): exact mass calcd for  $\text{C}_{13}\text{H}_{19}\text{NNaO}_7^+$  ( $\text{M}+\text{Na}$ ) $^+$  requires  $m/z$  324.1054, found  $m/z$  324.1056 ( $\Delta = +2$  ppm).

**IR (neat)**: 2955, 1731, 1703, 1436, 1348, 1250, 1164, 915, 729, 664, 634  $\text{cm}^{-1}$ .

**Dimethyl (S)-2-(2-(2,5-dioxopyrrolidin-1-yl)-2-isopropoxyethyl)malonate (3aq)**

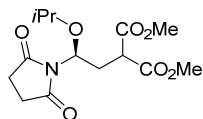

Colorless oli: 27.4 mg, 87% yield, 96% ee;  $R_f = 0.43$  (Pet/EtOAc/MeOH, 2/1/0.1, v/v/v);  $[\alpha]_D^{25} = -35.78$  ( $c = 1.05$ ,  $\text{CHCl}_3$ ); reaction time: 24 h; reaction temperature: 40 °C.

**HPLC** CHIRALPAK IG, n-hexane/2-propanol = 60/40, flow rate 0.8 mL/min,  $\lambda = 254$  nm, retention time: 10.605 min (major), 13.145 min (minor).

**$^1\text{H NMR}$**  (600 MHz,  $\text{CDCl}_3$ )  $\delta$  5.37 (dd,  $J = 9.0, 4.8$  Hz, 1H), 3.74 (s, 3H), 3.72 (s, 3H), 3.57 (t,  $J = 6.0$  Hz, 1H), 3.53 (dd,  $J = 9.0, 5.4$  Hz, 1H), 2.94 - 2.90 (m, 1H), 2.68 (s, 4H), 2.36 - 2.31 (m, 1H), 1.13 (d,  $J = 6.6$  Hz, 3H), 1.07 (d,  $J = 6.0$  Hz, 3H).

**$^{13}\text{C NMR}$**  (150 MHz,  $\text{CDCl}_3$ )  $\delta$  176.8, 169.2, 169.1, 77.9, 70.8, 52.8, 48.4, 31.3, 28.1, 23.0, 21.2.

**HRMS** (ESI): exact mass calcd for  $\text{C}_{14}\text{H}_{21}\text{NNaO}_7^+$  ( $\text{M}+\text{Na}$ ) $^+$  requires  $m/z$  338.1210, found  $m/z$  338.1208 ( $\Delta = -2$  ppm).

**IR** (neat): 2955, 1732, 1704, 1436, 1344, 1250, 1165, 1094, 914, 818, 729, 665, 635  $\text{cm}^{-1}$ .

**Dimethyl (S)-2-(2-(cyclopentylmethoxy)-2-(2,5-dioxopyrrolidin-1-yl)ethyl)malonate (3ar)**

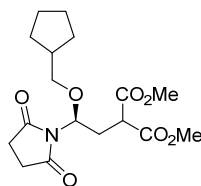

Colorless oli: 25.6 mg, 72% yield, 93% ee;  $R_f = 0.57$  (Pet/EtOAc/MeOH, 2/1/0.1, v/v/v);  $[\alpha]_D^{25} = -28.25$  ( $c = 0.80$ ,  $\text{CHCl}_3$ ); reaction time: 24 h; reaction temperature: 40 °C.

**HPLC** CHIRALPAK IG, n-hexane/2-propanol = 70/30, flow rate 0.8 mL/min,  $\lambda = 254$  nm, retention time: 13.460 min (major), 15.005 min (minor).

**$^1\text{H NMR}$**  (600 MHz,  $\text{CDCl}_3$ )  $\delta$  5.27 (dd,  $J = 9.0, 5.4$  Hz, 1H), 3.74 (s, 3H), 3.72 (s, 3H), 3.56 (dd,  $J = 9.0, 5.4$  Hz, 1H), 3.27 - 3.19 (m, 2H), 2.98 - 2.93 (m, 1H), 2.70 (s, 4H), 2.40 - 2.35 (m, 1H), 2.12 - 2.05 (m, 1H), 1.70 - 1.65 (m, 2H), 1.58 - 1.54 (m, 4H), 1.19 - 1.09 (m, 2H).

**$^{13}\text{C NMR}$**  (150 MHz,  $\text{CDCl}_3$ )  $\delta$  176.8, 169.2, 169.1, 80.3, 74.1, 52.9, 48.4, 39.1, 31.0, 29.54, 29.49, 28.1, 25.44, 25.41.

**HRMS** (ESI): exact mass calcd for  $\text{C}_{17}\text{H}_{25}\text{NNaO}_7^+$  ( $\text{M}+\text{Na}$ ) $^+$  requires  $m/z$  378.1523, found  $m/z$  378.1525 ( $\Delta = +2$  ppm).

**IR (neat)**: 2954, 1732, 1704, 1436, 1345, 1250, 1165, 1118, 819, 732, 664, 635  $\text{cm}^{-1}$ .

**Dimethyl (S)-2-(2-(cyclohexylmethoxy)-2-(2,5-dioxopyrrolidin-1-yl)ethyl)malonate (3as)**

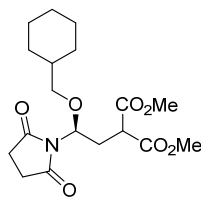

Colorless oli: 25.1 mg, 68% yield, 93% ee;  $R_f = 0.57$  (Pet/EtOAc/MeOH, 1/1/0.1, v/v/v);  $[\alpha]_D^{25} = -15.27$  ( $c = 1.10$ ,  $\text{CHCl}_3$ ); reaction time: 24 h; reaction temperature: 40 °C.

**HPLC** CHIRALPAK IG, n-hexane/2-propanol = 60/40, flow rate 0.8 mL/min,  $\lambda = 254$  nm, retention time: 11.587 min (major), 13.405 min (minor).

**$^1\text{H NMR}$**  (600 MHz,  $\text{CDCl}_3$ )  $\delta$  5.22 (dd,  $J = 9.0, 5.4$  Hz, 1H), 3.72 (s, 3H), 3.70 (s, 3H), 3.54 (dd,  $J = 9.0, 6.0$  Hz, 1H), 3.15 - 3.10 (m, 2H), 2.96 - 2.91 (m, 1H), 2.68 (s, 4H), 2.38 - 2.33 (m, 1H), 1.68 - 1.59 (m, 5H), 1.53 - 1.45 (m, 1H), 1.24 - 1.06 (m, 3H), 0.88 - 0.77 (m, 2H).

**$^{13}\text{C NMR}$**  (150 MHz,  $\text{CDCl}_3$ )  $\delta$  176.8, 169.09, 169.07, 80.3, 75.3, 52.8, 48.3, 37.7, 31.0, 29.90, 29.86, 28.1, 26.5, 25.8.

**HRMS** (ESI): exact mass calcd for  $\text{C}_{18}\text{H}_{27}\text{NNaO}_7^+$  ( $\text{M}+\text{Na}$ ) $^+$  requires  $m/z$  392.1680, found  $m/z$  392.1679 ( $\Delta = -1$  ppm).

**IR (neat)**: 2956, 1732, 1704, 1436, 1348, 1257, 1167, 1095, 1015, 799, 672, 663, 635  $\text{cm}^{-1}$ .



**Dimethyl 2-((S)-2-(((1R,5S)-6,6-dimethylbicyclo[3.1.1]hept-2-en-2-yl)methoxy)-2-(2,5-dioxopyrrolidin-1-yl)ethyl)malonate (3at)**

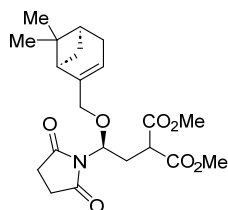

Colorless oli: 28.4 mg, 70% yield, >20:1 dr;  $R_f = 0.60$  (Pet/EtOAc/MeOH, 1/1/0.1, v/v/v);  $[\alpha]_D^{25} = 8.90$  ( $c = 1.15$ ,  $\text{CHCl}_3$ ); reaction time: 24 h; reaction temperature: 40 °C.

**HPLC** CHIRALPAK AD-H, n-hexane/2-propanol = 70/30, flow rate 1.0 mL/min,  $\lambda = 210$  nm, retention time: 7.003 min (major), 8.007 min (minor).

**$^1\text{H NMR}$**  (600 MHz,  $\text{CDCl}_3$ )  $\delta$  5.43 - 5.42 (m, 1H), 5.27 (dd,  $J = 7.8, 2.4$  Hz, 1H), 3.79 - 3.73 (m, 2H), 3.71 (s, 3H), 3.69 (s, 3H), 3.46 (dd,  $J = 8.4, 2.4$  Hz, 1H), 2.89 - 2.84 (m, 1H), 2.66 (s, 4H), 2.47 - 2.42 (m, 1H), 2.36 - 2.32 (m, 1H), 2.23 (d,  $J = 18.0$ , 1H), 2.18 (d,  $J = 18.0$ , 1H), 2.04 (d,  $J = 4.8$ , 1H), 1.28 (s, 3H), 1.03 (d,  $J = 9.0$ , 1H), 0.76 (s, 3H).

**$^{13}\text{C NMR}$**  (150 MHz,  $\text{CDCl}_3$ )  $\delta$  176.7, 169.1, 169.0, 144.2, 120.8, 80.1, 72.8, 52.8, 48.3, 43.4, 40.7, 38.0, 31.5, 31.4, 30.9, 28.1, 26.2, 21.0.

**HRMS** (ESI): exact mass calcd for  $\text{C}_{21}\text{H}_{29}\text{NNaO}_7^+$  ( $\text{M}+\text{Na}$ ) $^+$  requires  $m/z$  430.1836, found  $m/z$  430.1833 ( $\Delta = -3$  ppm).

**IR (neat)**: 2918, 1733, 1705, 1435, 1347, 1250, 1165, 1097, 913, 818, 729, 663, 648  $\text{cm}^{-1}$ .

**Dimethyl 2-((*R*)-2-(((1*R*,5*S*)-6,6-dimethylbicyclo[3.1.1]hept-2-en-2-yl)methoxy)-2-(2,5-dioxopyrrolidin-1-yl)ethyl)malonate (3at')**

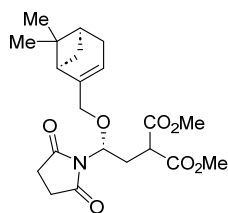

Colorless oli: 26.5 mg, 65% yield, >20:1 dr;  $R_f = 0.60$  (Pet/EtOAc/MeOH, 1/1/0.1, v/v/v);  $[\alpha]_D^{25} = -16.23$  ( $c = 1.15$ ,  $\text{CHCl}_3$ ); reaction time: 24 h; reaction temperature: 40 °C.

**HPLC** CHIRALPAK AD-H, n-hexane/2-propanol = 70/30, flow rate 1.0 mL/min,  $\lambda = 210$  nm, retention time: 7.045 min (minor), 8.103 min (major).

**$^1\text{H NMR}$**  (400 MHz,  $\text{CDCl}_3$ )  $\delta$  5.46 - 5.45 (m, 1H), 5.28 (dd,  $J = 8.0, 5.6$  Hz, 1H), 3.81 - 3.77 (m, 2H), 3.71 (s, 3H), 3.70 (s, 3H), 3.37 (d,  $J = 12.8$  Hz, 1H), 3.45 (dd,  $J = 8.8, 6.4$  Hz, 1H), 2.89 - 2.82 (m, 1H), 2.68 (t,  $J = 8.0$  Hz, 4H), 2.48 - 2.41 (m, 1H), 2.38 - 2.31 (m, 1H), 2.29 (d,  $J = 18.0$ , 1H), 2.17 (d,  $J = 18.0$ , 1H), 2.05 (d,  $J = 4.8$ , 1H), 1.25 (s, 3H), 1.12 (d,  $J = 8.4$ , 1H), 0.76 (s, 3H).

**$^{13}\text{C NMR}$**  (100 MHz,  $\text{CDCl}_3$ )  $\delta$  176.8, 169.1, 169.0, 143.6, 121.7, 79.0, 72.1, 52.8, 48.2, 43.4, 40.8, 38.1, 31.44, 31.38, 31.0, 28.1, 26.2, 21.0.

**HRMS** (ESI): exact mass calcd for  $\text{C}_{21}\text{H}_{29}\text{NNaO}_7^+$  ( $\text{M}+\text{Na}$ ) $^+$  requires  $m/z$  430.1836, found  $m/z$  430.1833 ( $\Delta = -3$  ppm).

**IR (neat)**: 2917, 1750, 1733, 1705, 1435, 1347, 1250, 1166, 1095, 914, 818, 731, 664  $\text{cm}^{-1}$ .

Dimethyl

2-((*S*)-2-(2,5-dioxopyrrolidin-1-yl)-2-(((2*S*,5*R*)-5-(5-methyl-2,4-dioxo-3,4-dihydropyrimidin-1(2*H*)-yl)-2,5-dihydrofuran-2-yl)methoxy)ethyl)malonate (**3au**)

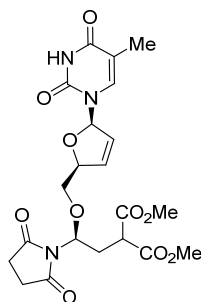

Colorless oli: 34.0 mg, 71% yield, >20:1 dr;  $R_f = 0.44$  (DCM/MeOH, 20/1, v/v);  $[\alpha]_D^{25} = 16.62$  (c = 0.64, CHCl<sub>3</sub>); reaction time: 24 h; reaction temperature: 40 °C.

**HPLC** CHIRALPAK AD-H, n-hexane/2-propanol = 70/30, flow rate 1.0 mL/min,  $\lambda = 254$  nm, retention time: 36.582 min (major), 40.400 min (minor).

**<sup>1</sup>H NMR** (400 MHz, CDCl<sub>3</sub>)  $\delta$  8.76 (s, 1H), 7.33 (s, 1H), 6.96 (s, 1H), 6.24 (d,  $J = 6.0$  Hz, 1H), 5.84 (d,  $J = 5.4$  Hz, 1H), 5.29 (dd,  $J = 8.4, 5.4$  Hz, 1H), 4.89 (s, 1H), 3.74 (s, 3H), 3.72 (s, 3H), 3.70 (s, 1H), 3.56 (dd,  $J = 10.8, 3.0$  Hz, 1H), 3.44 (t,  $J = 7.2$  Hz, 1H), 3.03 - 2.98 (m, 1H), 2.69 (s, 4H), 2.49 - 2.44 (m, 1H), 1.99 (s, 3H).

**<sup>13</sup>C NMR** (150 MHz, CDCl<sub>3</sub>)  $\delta$  175.6, 168.9, 168.8, 164.1, 151.0, 136.3, 133.4, 127.3, 111.6, 89.7, 84.9, 80.6, 69.9, 53.00, 52.97, 48.5, 30.7, 28.0, 12.3.

**HRMS** (ESI): exact mass calcd for C<sub>21</sub>H<sub>25</sub>N<sub>3</sub>NaO<sub>10</sub><sup>+</sup> (M+Na)<sup>+</sup> requires m/z 502.1432, found m/z 502.1434 ( $\Delta = +2$  ppm).

**IR (neat)**: 2923, 1779, 1685, 1436, 1353, 1249, 1168, 1054, 906, 794, 775, 732, 699, 671, 664, 545 cm<sup>-1</sup>.

Dimethyl

2-((*R*)-2-(2,5-dioxopyrrolidin-1-yl)-2-(((2*S*,5*R*)-5-(5-methyl-2,4-dioxo-3,4-dihydropyrimidin-1(2*H*)-yl)-2,5-dihydrofuran-2-yl)methoxy)ethyl)malonate (3au')

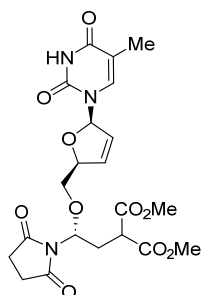

Colorless oli: 33.5 mg, 70% yield, >20:1 dr;  $R_f = 0.44$  (DCM/MeOH, 20/1, v/v);  $[\alpha]_D^{25} = -13.73$  (c = 1.25, CHCl<sub>3</sub>); reaction time: 24 h; reaction temperature: 40 °C.

**HPLC** CHIRALPAK AD-H, n-hexane/2-propanol = 70/30, flow rate 1.0 mL/min,  $\lambda = 254$  nm, retention time: 36.390 min (major), 41.173 min (minor).

**<sup>1</sup>H NMR** (400 MHz, CDCl<sub>3</sub>)  $\delta$  8.90 (s, 1H), 7.28 (s, 1H), 7.00 (s, 1H), 6.15 (d,  $J = 5.4$  Hz, 1H), 5.81 (d,  $J = 5.4$  Hz, 1H), 5.31 (t,  $J = 6.6$  Hz, 1H), 4.87 (s, 1H), 3.84 (d,  $J = 11.4$  Hz, 1H), 3.73 (s, 3H), 3.71 (s, 3H), 3.53 (d,  $J = 11.4$  Hz, 1H), 3.41 (t,  $J = 8.4$  Hz, 1H), 2.85 - 2.80 (m, 1H), 2.71 (s, 4H), 2.51 - 2.46 (m, 1H), 1.96 (s, 3H).

**<sup>13</sup>C NMR** (150 MHz, CDCl<sub>3</sub>)  $\delta$  176.8, 168.9, 168.8, 163.9, 151.2, 136.4, 134.0, 126.7, 111.3, 89.8, 85.2, 80.8, 70.9, 53.01, 52.95, 48.1, 30.9, 28.1, 12.3.

**HRMS** (ESI): exact mass calcd for C<sub>21</sub>H<sub>25</sub>N<sub>3</sub>NaO<sub>10</sub><sup>+</sup> (M+Na)<sup>+</sup> requires m/z 502.1432, found m/z 502.1428 ( $\Delta = -4$  ppm).

**IR (neat)**: 2923, 1776, 1698, 1685, 1436, 1351, 1248, 1169, 1053, 906, 798, 733, 699, 671, 664, 578 cm<sup>-1</sup>.

**Dimethyl 2-((S)-2-(((3aR,4R,6R,6aR)-6-(6-chloro-9H-purin-9-yl)-2,2-dimethyltetrahydrofuro[3,4-d][1,3]dioxol-4-yl)methoxy)-2-(2,5-dioxopyrrolidin-1-yl)ethyl) malonate (3av)**

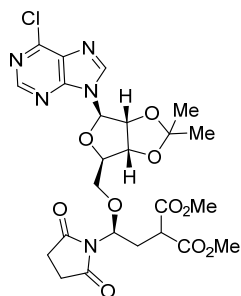

White solid: 47.6 mg, 82% yield, >20:1 dr; m.p.: 111.0 - 112.5 °C;  $R_f = 0.43$  (Pet/EtOAc/DCM/MeOH, 1/1/1/0.1, v/v/v/v);  $[\alpha]_D^{25} = 53.99$  ( $c = 0.56$ ,  $\text{CHCl}_3$ ); reaction time: 24 h; reaction temperature: 40 °C.

**HPLC** CHIRALPAK AD-H, n-hexane/2-propanol = 60/40, flow rate 1.0 mL/min,  $\lambda = 210$  nm, retention time: 13.775 min (major), 35.393 min (minor).

**$^1\text{H NMR}$**  (400 MHz,  $\text{CDCl}_3$ )  $\delta$  7.87 (s, 1H), 6.36 (s, 1H), 6.23 (dd,  $J = 8.4, 7.2$  Hz, 1H), 5.59 (d,  $J = 4.8$  Hz, 1H), 5.57 (d,  $J = 9.6$  Hz, 1H), 5.24 (dd,  $J = 6.6, 4.8$  Hz, 1H), 4.89 (dd,  $J = 6.6, 3.0$  Hz, 1H), 4.18 (dd,  $J = 5.4, 2.4$  Hz, 1H), 4.14 (dd,  $J = 10.2, 2.4$  Hz, 1H), 3.79 (s, 3H), 3.75 (dt,  $J = 12.6, 2.4$  Hz, 1H), 3.64 (s, 3H), 3.63 - 3.60 (m, 1H), 2.88 (dd,  $J = 13.8, 8.4$  Hz, 1H), 2.75 - 2.65 (m, 4H), 2.49 (dd,  $J = 13.8, 7.2$  Hz, 1H), 1.53 (s, 3H), 1.32 (s, 3H).

**$^{13}\text{C NMR}$**  (150 MHz,  $\text{CDCl}_3$ )  $\delta$  175.9, 169.0, 168.4, 159.1, 149.7, 133.9, 129.6, 113.7, 91.7, 86.5, 84.1, 80.9, 80.7, 67.3, 66.1, 63.5, 53.4, 53.3, 36.2, 28.3, 27.5, 25.7.

**HRMS** (ESI): exact mass calcd for  $\text{C}_{24}\text{H}_{28}\text{ClN}_5\text{NaO}_{10}^+$  ( $\text{M}+\text{Na}$ ) $^+$  requires  $m/z$  604.1417, found  $m/z$  604.1413 ( $\Delta = -4$  ppm).

**IR** (neat): 2933, 1732, 1702, 1597, 1497, 1366, 1277, 1179, 1065, 854, 813, 732, 700, 630, 577, 562  $\text{cm}^{-1}$ .

**Dimethyl 2-((*R*)-2-(((3*aR*,4*R*,6*R*,6*aR*)-6-(6-chloro-9*H*-purin-9-yl)-2,2-dimethyltetrahy drofuro[3,4-*d*][1,3]dioxol-4-yl)methoxy)-2-(2,5-dioxopyrrolidin-1-yl)ethyl)malonate (3av')**

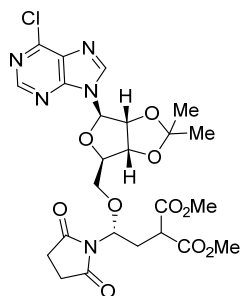

White solid: 34.9 mg, 60% yield, >20:1 dr; m.p.: 113.4 - 115.0 °C;  $R_f = 0.43$  (Pet/EtOAc/DCM/MeOH, 1/1/1/0.1, v/v/v/v);  $[\alpha]_D^{25} = -123.63$  ( $c = 0.90$ ,  $\text{CHCl}_3$ ); reaction time: 24 h; reaction temperature: 40 °C.

**HPLC** CHIRALPAK AD-H, n-hexane/2-propanol = 60/40, flow rate 1.0 mL/min,  $\lambda = 210$  nm, retention time: 13.462 min (minor), 35.583 min (major).

**$^1\text{H NMR}$**  (600 MHz,  $\text{CDCl}_3$ )  $\delta$  7.89 (s, 1H), 6.34 (s, 1H), 6.26 (dd,  $J = 9.0, 7.2$  Hz, 1H), 5.68 (d,  $J = 4.8$  Hz, 1H), 5.57 (d,  $J = 9.6$  Hz, 1H), 5.02 (t,  $J = 5.4$  Hz, 1H), 4.91 (dd,  $J = 6.0, 1.2$  Hz, 1H), 4.30 (dd,  $J = 3.6, 1.8$  Hz, 1H), 3.83 (s, 3H), 3.82 (t,  $J = 1.8$  Hz, 1H), 3.72 - 3.96 (m, 1H), 3.63 (s, 3H), 2.90 (dd,  $J = 13.8, 8.4$  Hz, 1H), 2.76 - 2.71 (m, 4H), 2.50 (dd,  $J = 13.8, 7.2$  Hz, 1H), 1.64 (s, 3H), 1.33 (s, 3H).

**$^{13}\text{C NMR}$**  (150 MHz,  $\text{CDCl}_3$ )  $\delta$  175.9, 168.9, 168.7, 157.5, 149.8, 133.7, 129.9, 113.9, 92.9, 86.2, 84.2, 81.4, 80.4, 68.1, 66.5, 63.5, 53.7, 53.5, 35.8, 28.4, 27.7, 25.6.

**HRMS** (ESI): exact mass calcd for  $\text{C}_{24}\text{H}_{28}\text{ClN}_5\text{NaO}_{10}^+$  ( $\text{M}+\text{Na}$ ) $^+$  requires  $m/z$  604.1417, found  $m/z$  604.1415 ( $\Delta = -2$  ppm).

**IR** (neat): 2960, 1739, 1704, 1599, 1509, 1369, 1258, 1178, 1074, 851, 800, 726, 672, 648, 632, 575  $\text{cm}^{-1}$ .

**Dimethyl (S)-2-(2-(benzyloxy)-2-(2,5-dioxo-2,5-dihydro-1H-pyrrol-1-yl)ethyl)malonate**

**(3ba)**

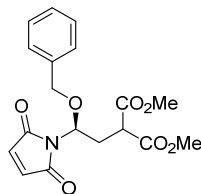

Colorless oli: 34.7 mg, 96% yield, 93% ee;  $R_f = 0.66$  (Pet/EtOAc/DCM/MeOH, 2/1/1/0.2, v/v/v);

$[\alpha]_D^{23} = -5.11$  ( $c = 1.00$ ,  $\text{CHCl}_3$ ); reaction time: 24 h; reaction temperature: 0 °C.

**HPLC** CHIRALPAK AD-H, n-hexane/2-propanol = 70/30, flow rate 0.8 mL/min,  $\lambda = 210$  nm, retention time: 11.718 min (minor), 13.377 min (major).

**$^1\text{H NMR}$**  (600 MHz,  $\text{CDCl}_3$ )  $\delta$  7.31 - 7.28 (m, 2H), 7.25 - 7.22 (m, 3H), 6.57 (s, 2H), 5.34 (dd,  $J = 9.0$ , 4.8 Hz, 1H), 4.49 (d,  $J = 12.0$  Hz, 1H), 4.43 (d,  $J = 12.0$  Hz, 1H), 3.69 (s, 3H), 3.66 (s, 3H), 3.53 (dd,  $J = 9.0$ , 6.6 Hz, 1H), 3.02 - 2.98 (m, 1H), 2.45 - 2.30 (m, 1H).

**$^{13}\text{C NMR}$**  (150 MHz,  $\text{CDCl}_3$ )  $\delta$  170.2, 169.1, 169.0, 136.9, 134.1, 128.5, 128.1, 128.0, 78.2, 71.6, 52.8, 48.3, 31.8.

**HRMS** (ESI): exact mass calcd for  $\text{C}_{18}\text{H}_{19}\text{NNaO}_7^+$  ( $\text{M}+\text{Na}$ ) $^+$  requires  $m/z$  384.1054, found  $m/z$  384.1053 ( $\Delta = -1$  ppm).

**IR (neat)**: 2954, 1732, 1708, 1436, 1351, 1245, 1151, 1090, 913, 830, 738, 694, 645  $\text{cm}^{-1}$ .

**Dimethyl (S)-2-(2-(benzyloxy)-2-(1,3-dioxisoindolin-2-yl)ethyl)malonate (3ca)**

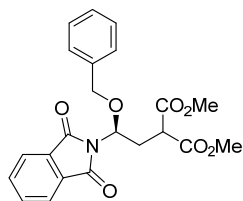

Colorless oli: 27.1 mg, 66% yield, 86% ee;  $R_f = 0.77$  (Pet/EtOAc/DCM/MeOH, 1/1/1/0.1, v/v/v/v);

$[\alpha]_D^{23} = -28.00$  ( $c = 0.30$ ,  $\text{CHCl}_3$ ); reaction time: 10 days; reaction temperature:  $-40\text{ }^\circ\text{C}$ .

**HPLC** CHIRALPAK IG, n-hexane/2-propanol = 60/40, flow rate 1.0 mL/min,  $\lambda = 210\text{ nm}$ , retention time: 24.337 min (minor), 34.810 min (major).

**$^1\text{H NMR}$**  (400 MHz,  $\text{CDCl}_3$ )  $\delta$  7.77 - 7.71 (m, 2H), 7.67 - 7.63 (m, 2H), 7.21 - 7.18 (m, 2H), 7.16 - 7.12 (m, 2H), 7.08 - 7.04 (m, 1H), 5.48 (dd,  $J = 8.4, 4.8\text{ Hz}$ , 1H), 4.44 (s, 2H), 3.61 (s, 3H), 3.57 (s, 3H), 3.51 (dd,  $J = 8.8, 6.8\text{ Hz}$ , 1H), 3.08 - 3.01 (m, 1H), 2.52 - 2.45 (m, 1H).

**$^{13}\text{C NMR}$**  (100 MHz,  $\text{CDCl}_3$ )  $\delta$  169.1, 169.0, 167.7, 136.6, 134.4, 131.6, 128.3, 128.1, 127.8, 123.6, 79.0, 71.5, 52.74, 52.70, 48.4, 31.9.

**HRMS** (ESI): exact mass calcd for  $\text{C}_{22}\text{H}_{21}\text{NNaO}_7^+$  ( $\text{M}+\text{Na}$ ) $^+$  requires  $m/z$  434.1210, found  $m/z$  434.1210 ( $\Delta = 0\text{ ppm}$ ).

**IR** (neat): 2956, 1777, 1732, 1713, 1436, 1324, 1257, 1156, 1087, 910, 719, 698, 645  $\text{cm}^{-1}$ .



**Dimethyl (S)-2-(2-(benzyloxy)-2-(5-nitro-1,3-dioxisoindolin-2-yl)ethyl)malonate (3da)**

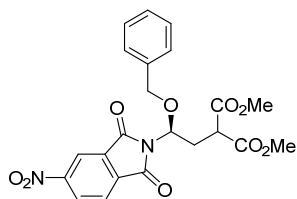

White solid: 29.6 mg, 65% yield, 93% ee; m.p.: 96.2 - 97.7 °C;  $R_f = 0.77$  (Pet/EtOAc/DCM/MeOH, 1/1/1/0.1, v/v/v/v);  $[\alpha]_D^{24} = -4.07$  (c = 0.80, CHCl<sub>3</sub>); reaction time: 60h; reaction temperature: 0 °C.

**HPLC** CHIRALPAK AD-H, n-hexane/2-propanol = 60/40, flow rate 1.0 mL/min,  $\lambda = 254$  nm, retention time: 22.633 min (major), 32.217 min (minor).

**<sup>1</sup>H NMR** (600 MHz, CDCl<sub>3</sub>)  $\delta$  8.58 - 8.56 (m, 2H), 7.97 (d,  $J = 7.8$  Hz, 1H), 7.23 (d,  $J = 7.2$  Hz, 2H), 7.16 (t,  $J = 7.8$  Hz, 2H), 7.06 (t,  $J = 7.8$  Hz, 1H), 5.58 (dd,  $J = 8.4, 4.8$  Hz, 1H), 4.61 (d,  $J = 12.6$  Hz, 1H), 4.48 (d,  $J = 12.6$  Hz, 1H), 3.71 (s, 3H), 3.67 (s, 3H), 3.58 (dd,  $J = 8.4, 6.0$  Hz, 1H), 3.12 - 3.07 (m, 1H), 2.54 - 2.50 (m, 1H).

**<sup>13</sup>C NMR** (150 MHz, CDCl<sub>3</sub>)  $\delta$  169.3, 169.1, 165.8, 165.6, 152.2, 136.9, 136.1, 133.2, 129.7, 128.7, 128.3, 128.2, 125.0, 119.2, 80.2, 72.5, 53.11, 53.08, 48.5, 32.1.

**HRMS** (ESI): exact mass calcd for C<sub>22</sub>H<sub>20</sub>N<sub>2</sub>NaO<sub>9</sub><sup>+</sup> (M+Na)<sup>+</sup> requires m/z 479.1061, found m/z 479.1056 ( $\Delta = -5$  ppm).

**IR (neat)**: 2959, 1782, 1748, 1728, 1706, 1510, 1434, 1346, 1247, 1193, 1063, 801, 722, 705 cm<sup>-1</sup>.

**Dimethyl (S)-2-(2-(3-benzoyl-5-methyl-2,4-dioxo-3,4-dihydropyrimidin-1(2H)-yl)-2-(benzyloxy)ethyl)malonate (3ea)**

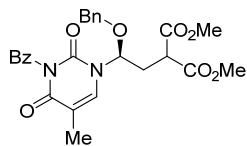

Colorless oil: 47.4 mg, 96% yield, 70% ee;  $R_f = 0.77$  (Pet/EtOAc/MeOH, 2/1/0.1, v/v/v);  $[\alpha]_D^{24} = 1.29$  ( $c = 1.40$ ,  $\text{CHCl}_3$ ); reaction time: 24h; reaction temperature: 40 °C.

**HPLC** CHIRALPAK IA, n-hexane/2-propanol = 80/20, flow rate 0.8 mL/min,  $\lambda = 210$  nm, retention time: 18.423 min (major), 21.150 min (minor).

**$^1\text{H NMR}$**  (600 MHz,  $\text{CDCl}_3$ )  $\delta$  7.91 (d,  $J = 7.2$  Hz, 2H), 7.65 (t,  $J = 7.2$  Hz, 1H), 7.51 (t,  $J = 7.8$  Hz, 2H), 7.38 - 7.32 (m, 3H), 7.29 (d,  $J = 7.2$  Hz, 2H), 7.22 (s, 1H), 5.89 (dd,  $J = 8.4, 4.8$  Hz, 1H), 4.52 (t,  $J = 12.0$  Hz, 2H), 3.68 (s, 3H), 3.66 (s, 3H), 3.52 (t,  $J = 7.2$  Hz, 1H), 2.53 - 2.48 (m, 1H), 2.38 - 2.33 (m, 1H), 1.92 (s, 3H).

**$^{13}\text{C NMR}$**  (150 MHz,  $\text{CDCl}_3$ )  $\delta$  169.0, 168.9, 168.6, 162.7, 149.8, 135.9, 135.2, 134.2, 131.7, 130.6, 129.3, 128.8, 128.7, 128.5, 111.9, 83.0, 72.3, 53.1, 53.0, 47.9, 34.1, 12.7.

**HRMS** (ESI): exact mass calcd for  $\text{C}_{26}\text{H}_{26}\text{N}_2\text{NaO}_8^+$  ( $\text{M}+\text{Na}$ ) $^+$  requires  $m/z$  517.1581, found  $m/z$  517.1581 ( $\Delta = 0$  ppm).

**IR** (neat): 2955, 1746, 1699, 1650, 1436, 1254, 1093, 1063, 978, 909, 762, 726, 699, 686  $\text{cm}^{-1}$ .

## Catalytic asymmetric ring-opening of aminocyclopropanes with acids and phenols

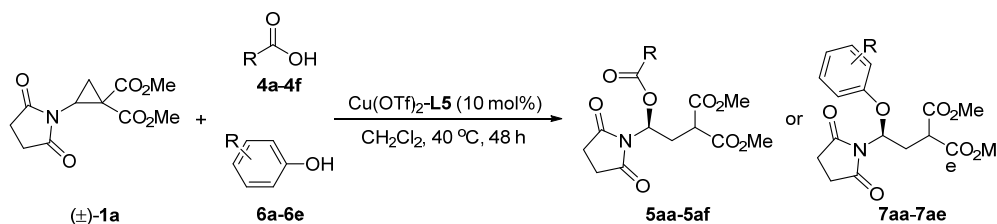

**General method B** - In a dry reaction tube, a mixture of  $\text{Cu}(\text{OTf})_2$  (3.6 mg, 0.01 mmol, 10 mol%), ligand **L5** (7.8 mg, 0.011 mmol, 11 mol%), and aminocyclopropane **1** (0.22 mmol) in DCM (3.0 mL) were stirred at room temperature for 30 minutes under the atmosphere of nitrogen. Then isoquinoline substrate **4** or **6** (0.1 mmol) in DCM (1.0 mL) was added to the mixture of catalyst via a syringe. Subsequently, the reaction was stirred at 40 °C for 48 h. After the reaction was complete (monitored by TLC), the reaction was filtered through a glass funnel within layer of silica gel (100-200 mesh) and purified by flash column chromatography (Pet/EtOAc/MeOH, v/v/v, 5:1:0.1-1:1:0.1; Pet/EtOAc/DCM/MeOH, v/v/v/v, 5:1:1:1:0.1-1:1:1:0.1) to give the product **5** or **7**.

**Dimethyl (S)-2-(2-(benzyloxy)-2-(2,5-dioxopyrrolidin-1-yl)ethyl)malonate (5aa)**

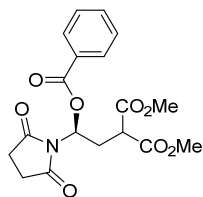

Colorless oil: 29.3 mg, 77% yield, 92% ee;  $R_f = 0.71$  (Pet/EtOAc/DCM/MeOH, 1/1/1/0.1, v/v/v/v).

$[\alpha]_D^{25} = +16.57$  ( $c = 0.36$ ,  $\text{CHCl}_3$ ); reaction time: 48 h; reaction temperature: 40 °C.

**HPLC** CHIRALPAK IA, n-hexane/2-propanol = 60/40, flow rate 1.0 mL/min,  $\lambda = 254$  nm, retention time: 10.108 min (major), 11.785 min (minor).

**$^1\text{H NMR}$**  (600 MHz,  $\text{CDCl}_3$ )  $\delta$  8.03 (d,  $J = 7.2$  Hz, 2H), 7.58 (t,  $J = 7.8$  Hz, 1H), 7.44 (t,  $J = 7.8$  Hz, 2H), 6.71 (t,  $J = 7.2$  Hz, 1H), 3.73 (s, 3H), 3.70 (s, 3H), 3.52 (t,  $J = 7.2$  Hz, 1H), 3.08 - 3.03 (m, 1H), 2.80 - 2.76 (m, 1H), 2.73 - 2.69 (m, 4H).

**$^{13}\text{C NMR}$**  (150 MHz,  $\text{CDCl}_3$ )  $\delta$  175.5, 168.7, 164.8, 133.9, 130.2, 128.8, 128.7, 73.5, 53.09, 53.05, 48.21, 30.2, 28.1.

**HRMS** (ESI): exact mass calcd for  $\text{C}_{18}\text{H}_{19}\text{NNaO}_8^+$  ( $\text{M}+\text{Na}$ ) $^+$  requires  $m/z$  400.1003, found  $m/z$  400.1001 ( $\Delta = -2$  ppm).

**IR (neat)**: 2921, 1727, 1703, 1435, 1373, 1258, 1157, 1088, 800, 710, 686, 663  $\text{cm}^{-1}$ .

**Dimethyl (S)-2-(2-(2,5-dioxopyrrolidin-1-yl)-2-((2-methylbenzoyl)oxy)ethyl)malonate (5ab)**

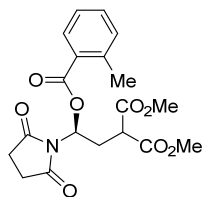

Colorless oil: 30.5 mg, 78% yield, 96% ee;  $R_f = 0.71$  (Pet/EtOAc/DCM/MeOH, 1/1/1/0.1, v/v/v/v).

$[\alpha]_D^{25} = -6.67$  ( $c = 1.15$ ,  $\text{CHCl}_3$ ); reaction time: 48 h; reaction temperature: 40 °C.

**HPLC** CHIRALPAK IA, n-hexane/2-propanol = 60/40, flow rate 1.0 mL/min,  $\lambda = 254$  nm, retention time: 7.922 min (major), 9.662 min (minor).

**$^1\text{H NMR}$**  (600 MHz,  $\text{CDCl}_3$ )  $\delta$  7.96 (d,  $J = 7.8$  Hz, 2H), 7.42 (td,  $J = 7.8, 1.2$  Hz, 2H), 7.24 (t,  $J = 7.8$  Hz, 2H), 6.68 (dd,  $J = 7.8, 6.6$  Hz, 1H), 3.74 (s, 3H), 3.69 (s, 3H), 3.51 (dd,  $J = 7.8, 6.6$  Hz, 1H), 3.04 - 3.00 (m, 1H), 2.79 - 2.76 (m, 1H), 2.74 - 2.69 (m, 4H), 2.59 (s, 3H).

**$^{13}\text{C NMR}$**  (150 MHz,  $\text{CDCl}_3$ )  $\delta$  175.6, 168.7, 165.4, 141.4, 133.0, 132.0, 131.5, 127.9, 126.0, 73.3, 53.1, 53.0, 48.1, 30.2, 28.1, 22.0.

**HRMS** (ESI): exact mass calcd for  $\text{C}_{19}\text{H}_{21}\text{NNaO}_8^+$  ( $\text{M}+\text{Na}$ ) $^+$  requires  $m/z$  414.1159, found  $m/z$  414.1157 ( $\Delta = -2$  ppm).

**IR (neat)**: 2923, 1727, 1710, 1436, 1371, 1241, 1163, 1050, 800, 738, 670, 663  $\text{cm}^{-1}$ .

**Dimethyl (S)-2-(2-(2,5-dioxopyrrolidin-1-yl)-2-((3-methylbenzoyl)oxy)ethyl)malonate (5ac)**

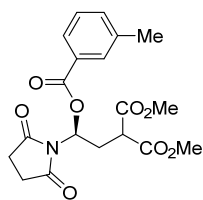

Colorless oil: 23.9 mg, 61% yield, 94% ee;  $R_f = 0.71$  (Pet/EtOAc/DCM/MeOH, 1/1/1/0.1, v/v/v/v).

$[\alpha]_D^{25} = +5.67$  ( $c = 1.15$ ,  $\text{CHCl}_3$ ); reaction time: 48 h; reaction temperature: 40 °C.

**HPLC** CHIRALPAK IA, n-hexane/2-propanol = 60/40, flow rate 1.0 mL/min,  $\lambda = 254$  nm, retention time: 8.655 min (major), 10.910 min (minor).

**$^1\text{H NMR}$**  (400 MHz,  $\text{CDCl}_3$ )  $\delta$  7.81 (d,  $J = 4.4$  Hz, 2H), 7.37 (d,  $J = 7.6$  Hz, 1H), 7.31 (t,  $J = 8.0$  Hz, 1H), 6.69 (t,  $J = 7.2$  Hz, 1H), 3.73 (s, 3H), 3.70 (s, 3H), 3.51 (t,  $J = 7.2$  Hz, 1H), 3.08 - 3.01 (m, 1H), 2.80 - 2.74 (m, 1H), 2.70 (s, 4H), 2.38 (s, 3H).

**$^{13}\text{C NMR}$**  (100 MHz,  $\text{CDCl}_3$ )  $\delta$  175.5, 168.7, 165.0, 138.5, 134.6, 130.6, 128.7, 128.5, 127.3, 73.4, 53.04, 53.01, 48.1, 30.1, 28.1, 21.3.

**HRMS** (ESI): exact mass calcd for  $\text{C}_{19}\text{H}_{21}\text{NNaO}_8^+$  ( $\text{M}+\text{Na}$ ) $^+$  requires  $m/z$  414.1159, found  $m/z$  414.1155 ( $\Delta = -4$  ppm).

**IR (neat)**: 2956, 1727, 1711, 1435, 1372, 1270, 1168, 1074, 817, 729, 673, 663  $\text{cm}^{-1}$ .

**Dimethyl (S)-2-(2-(2,5-dioxopyrrolidin-1-yl)-2-((4-methoxybenzoyl)oxy)ethyl)malonate (5ad)**

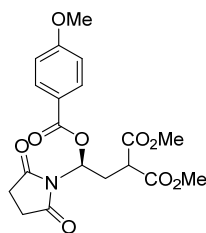

Colorless oil: 36.6 mg, 90% yield, 93% ee;  $R_f = 0.71$  (Pet/EtOAc/DCM/MeOH, 1/1/1/0.1, v/v/v/v).

$[\alpha]_D^{23} = +4.71$  ( $c = 0.75$ ,  $\text{CHCl}_3$ ); reaction time: 48 h; reaction temperature: 40 °C.

**HPLC** CHIRALPAK IA, n-hexane/2-propanol = 60/40, flow rate 1.0 mL/min,  $\lambda = 254$  nm, retention time: 14.303 min (major), 17.492 min (minor).

**$^1\text{H NMR}$**  (600 MHz,  $\text{CDCl}_3$ )  $\delta$  7.98 (d,  $J = 8.4$  Hz, 2H), 6.91 (d,  $J = 9.0$  Hz, 2H), 6.69 (dd,  $J = 7.8, 6.6$  Hz, 1H), 3.85 (s, 3H), 3.73 (s, 3H), 3.70 (s, 3H), 3.52 (dd,  $J = 7.8, 6.6$  Hz, 1H), 3.07 - 3.02 (m, 1H), 2.77 - 2.73 (m, 1H), 2.72 - 2.66 (m, 4H).

**$^{13}\text{C NMR}$**  (150 MHz,  $\text{CDCl}_3$ )  $\delta$  175.5, 168.73, 168.69, 164.5, 164.1, 132.3, 121.1, 113.9, 73.3, 55.6, 53.1, 53.0, 48.1, 30.2, 28.1.

**HRMS** (ESI): exact mass calcd for  $\text{C}_{19}\text{H}_{21}\text{NNaO}_9^+$  ( $\text{M}+\text{Na}$ ) $^+$  requires  $m/z$  430.1109, found  $m/z$  430.1109 ( $\Delta = 0$  ppm).

**IR** (neat): 2923, 1785, 1724, 1605, 1512, 1436, 1372, 1250, 1165, 1081, 849, 769, 734, 695, 671, 664  $\text{cm}^{-1}$ .

**Dimethyl (S)-2-(2-((2-naphthoyl)oxy)-2-(2,5-dioxopyrrolidin-1-yl)ethyl)malonate (5ae)**

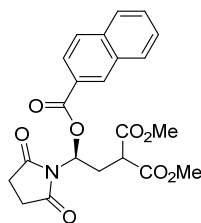

Colorless oil: 27.8 mg, 65% yield, 98% ee;  $R_f = 0.71$  (Pet/EtOAc/DCM/MeOH, 1/1/1/0.1, v/v/v/v).

$[\alpha]_D^{25} = +16.00$  ( $c = 1.00$ ,  $\text{CHCl}_3$ ); reaction time: 48 h; reaction temperature: 40 °C.

**HPLC** CHIRALPAK IA, n-hexane/2-propanol = 60/40, flow rate 1.0 mL/min,  $\lambda = 254$  nm, retention time: 13.892 min (major), 19.480 min (minor).

**$^1\text{H NMR}$**  (400 MHz,  $\text{CDCl}_3$ )  $\delta$  8.61 (s, 1H), 8.02 (dd,  $J = 8.8, 2.0$  Hz, 1H), 7.97 (d,  $J = 7.6$  Hz, 1H), 7.87 (d,  $J = 8.4$  Hz, 1H), 7.63 - 7.53 (m, 2H), 6.79 (dd,  $J = 8.0, 6.4$  Hz, 1H), 3.75 (s, 3H), 3.71 (s, 3H), 3.57 (dd,  $J = 8.0, 6.8$  Hz, 1H), 3.16 - 3.09 (m, 1H), 2.87 - 2.80 (m, 1H), 2.73 (s, 4H).

**$^{13}\text{C NMR}$**  (150 MHz,  $\text{CDCl}_3$ )  $\delta$  175.4, 168.6, 164.9, 135.9, 132.4, 131.9, 129.5, 128.7, 128.4, 127.8, 126.9, 125.9, 125.2, 73.5, 52.99, 52.96, 48.0, 30.1, 28.0.

**HRMS** (ESI): exact mass calcd for  $\text{C}_{22}\text{H}_{21}\text{NNaO}_8^+$  ( $\text{M}+\text{Na}$ ) $^+$  requires  $m/z$  450.1159, found  $m/z$  450.1163 ( $\Delta = +4$  ppm).

**IR** (neat): 2955, 1785, 1726, 1710, 1435, 1373, 1277, 1168, 1079, 778, 763, 733, 663  $\text{cm}^{-1}$ .



**bDimethyl 2-((S)-2-(2,5-dioxopyrrolidin-1-yl)-2-(((S)-2-(6-methoxynaphthalen-2-yl)propanoyloxy)ethyl)malonate (5af)**

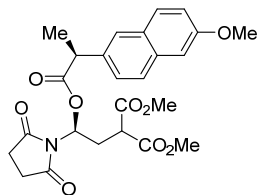

Colorless oil: 33.2 mg, 73% yield, >20:1 dr;  $R_f = 0.75$  (Pet/EtOAc/DCM/MeOH, 1/1/1/0.1, v/v/v/v).

$[\alpha]_D^{25} = -7.50$  ( $c = 0.40$ ,  $\text{CHCl}_3$ ); reaction time: 48 h; reaction temperature: 40 °C.

**HPLC** CHIRALPAK AD-H, n-hexane/2-propanol = 60/40, flow rate 1.0 mL/min,  $\lambda = 254$  nm, retention time: 15.390 min (major), 19.868 min (minor).

**$^1\text{H NMR}$**  (600 MHz,  $\text{CDCl}_3$ )  $\delta$  7.69 (d,  $J = 4.2$  Hz, 1H), 7.67 (d,  $J = 3.6$  Hz, 1H), 7.59 (d,  $J = 1.8$  Hz, 1H), 7.34 (dd,  $J = 9.0, 2.4$  Hz, 1H), 7.13 (d,  $J = 9.0, 2.4$  Hz, 1H), 7.09 (d,  $J = 2.4$  Hz, 1H), 6.45 (dd,  $J = 7.8, 6.6$  Hz, 1H), 3.91 (s, 3H), 3.85 (dd,  $J = 14.4, 7.2$  Hz, 1H), 3.74 (s, 3H), 3.72 (s, 3H), 3.40 (dd,  $J = 8.4, 6.0$  Hz, 1H), 2.90 - 2.85 (m, 1H), 2.67 - 2.62 (m, 1H), 2.41 - 2.35 (m, 2H), 2.32 - 2.26 (m, 2H), 1.57 (d,  $J = 7.2$ , 3H).

**$^{13}\text{C NMR}$**  (150 MHz,  $\text{CDCl}_3$ )  $\delta$  175.2, 173.0, 168.61, 168.58, 157.9, 134.8, 133.8, 129.3, 128.9, 127.3, 126.4, 126.2, 119.3, 105.6, 73.2, 55.4, 53.1, 53.0, 47.9, 45.1, 29.7, 27.7, 18.0.

**HRMS** (ESI): exact mass calcd for  $\text{C}_{25}\text{H}_{27}\text{NNaO}_9^+$  ( $\text{M}+\text{Na}$ ) $^+$  requires  $m/z$  508.1578, found  $m/z$  508.1574 ( $\Delta = -4$  ppm).

**IR** (neat): 2923, 1785, 1731, 1719, 1605, 1436, 1371, 1260, 1159, 1028, 815, 734, 671, 662  $\text{cm}^{-1}$ .

Dimethyl

2-((*R*)-2-(2,5-dioxopyrrolidin-1-yl)-2-(((*S*)-2-(6-methoxynaphthalen-2-yl)

propanoyloxy)ethyl)malonate (**5af'**)

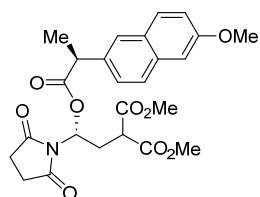

Colorless oil: 30.9 mg, 68% yield, >20:1 dr;  $R_f = 0.75$  (Pet/EtOAc/DCM/MeOH, 1/1/1/0.1, v/v/v/v).

$[\alpha]_D^{25} = +4.52$  ( $c = 0.90$ , CHCl<sub>3</sub>); reaction time: 48 h; reaction temperature: 40 °C.

**HPLC** CHIRALPAK AD-H, n-hexane/2-propanol = 60/40, flow rate 1.0 mL/min,  $\lambda = 254$  nm, retention time: 15.668 min (major), 20.635 min (minor).

**<sup>1</sup>H NMR** (600 MHz, CDCl<sub>3</sub>)  $\delta$  7.70 (dd,  $J = 9.0, 5.4$  Hz, 2H), 7.66 (d,  $J = 1.8$  Hz, 1H), 7.37 (dd,  $J = 9.0, 2.4$  Hz, 1H), 7.14 (dd,  $J = 9.0, 3.0$  Hz, 1H), 7.11 (d,  $J = 3.0$  Hz, 1H), 6.38 (dd,  $J = 8.4, 6.6$  Hz, 1H), 3.91 (s, 3H), 3.86 (q,  $J = 7.2$  Hz, 1H), 3.63 (s, 3H), 3.58 (s, 3H), 3.19 (dd,  $J = 9.0, 5.4$  Hz, 1H), 2.79 - 2.74 (m, 1H), 2.66 - 2.59 (m, 4H), 2.56 - 2.51 (m, 1H), 1.54 (d,  $J = 7.2$ , 3H).

**<sup>13</sup>C NMR** (150 MHz, CDCl<sub>3</sub>)  $\delta$  175.4, 173.0, 168.52, 168.47, 157.8, 134.8, 133.9, 129.4, 129.0, 127.4, 126.3, 126.2, 119.1, 105.6, 73.3, 55.4, 52.9, 52.8, 47.4, 45.2, 29.7, 28.0, 18.2.

**HRMS** (ESI): exact mass calcd for C<sub>25</sub>H<sub>27</sub>NNaO<sub>9</sub><sup>+</sup> (M+Na)<sup>+</sup> requires  $m/z$  508.1578, found  $m/z$  508.1577 ( $\Delta = -1$  ppm).

**IR (neat)**: 2922, 1785, 1733, 1714, 1605, 1436, 1372, 1259, 1154, 1028, 814, 734, 670, 663 cm<sup>-1</sup>.

**Dimethyl (S)-2-(2-(2,5-dioxopyrrolidin-1-yl)-2-phenoxyethyl)malonate (7aa)**

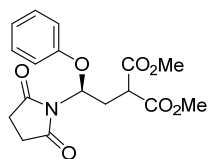

Colorless oil: 29.7 mg, 85% yield, 94% ee;  $R_f = 0.57$  (Pet/EtOAc/MeOH, 1/1/0.1, v/v/v).  $[\alpha]_D^{25} = -8.04$  ( $c = 0.90$ ,  $\text{CHCl}_3$ ); reaction time: 48 h; reaction temperature: 40 °C.

**HPLC** CHIRALPAK OD-H, n-hexane/2-propanol = 70/30, flow rate 1.0 mL/min,  $\lambda = 254$  nm, retention time: 13.230 min (major), 19.232 min (minor).

**$^1\text{H NMR}$**  (400 MHz,  $\text{CDCl}_3$ )  $\delta$  7.29 - 7.23 (m, 2H), 7.03 - 7.00 (m, 1H), 6.97 - 6.94 (m, 2H), 6.13 (dd,  $J = 5.2, 8.4$  Hz, 1H), 3.75 (s, 3H), 3.72 (s, 3H), 3.63 (dd,  $J = 8.8, 6.4$  Hz, 1H), 3.17 - 3.10 (m, 1H), 2.66 - 2.59 (m, 5H).

**$^{13}\text{C NMR}$**  (100 MHz,  $\text{CDCl}_3$ )  $\delta$  176.2, 168.97, 168.95, 155.7, 129.9, 123.0, 116.5, 77.7, 53.0, 48.1, 31.1, 28.1, 1.1.

**HRMS** (ESI): exact mass calcd for  $\text{C}_{17}\text{H}_{19}\text{NNaO}_7^+$  ( $\text{M}+\text{Na}$ ) $^+$  requires  $m/z$  372.1054, found  $m/z$  372.1050 ( $\Delta = -4$  ppm).

**IR (neat)**: 2921, 1780, 1752, 1727, 1705, 1432, 1361, 1164, 1058, 753, 692, 664, 619  $\text{cm}^{-1}$ .

**Dimethyl (S)-2-(2-(2,5-dioxopyrrolidin-1-yl)-2-phenoxyethyl)malonate (7ab)**

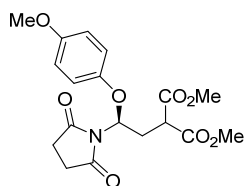

Colorless oil: 32.6 mg, 86% yield, 92% ee;  $R_f = 0.57$  (Pet/EtOAc/MeOH, 1/1/0.1, v/v/v).  $[\alpha]_D^{25} = -24.27$  ( $c = 1.25$ ,  $\text{CHCl}_3$ ); reaction time: 48 h; reaction temperature: 40 °C.

**HPLC** CHIRALPAK OD-H, n-hexane/2-propanol = 70/30, flow rate 1.0 mL/min,  $\lambda = 254$  nm, retention time: 17.575 min (major), 24.372 min (minor).

**$^1\text{H NMR}$**  (400 MHz,  $\text{CDCl}_3$ )  $\delta$  6.88 (d,  $J = 9.0$  Hz, 2H), 6.77 (d,  $J = 9.0$  Hz, 2H), 5.98 (dd,  $J = 8.4, 5.4$  Hz, 1H), 3.743 (s, 3H), 3.739 (s, 3H), 3.735 (s, 3H), 3.64 (dd,  $J = 9.0, 6.0$  Hz, 1H), 3.14 - 3.09 (m, 1H), 2.66 - 2.57 (m, 5H).

**$^{13}\text{C NMR}$**  (100 MHz,  $\text{CDCl}_3$ )  $\delta$  176.2, 169.01, 168.98, 155.6, 149.4, 118.4, 114.9, 78.9, 55.7, 53.0, 48.2, 31.0, 28.0.

**HRMS** (ESI): exact mass calcd for  $\text{C}_{18}\text{H}_{21}\text{NNaO}_8^+$  ( $\text{M}+\text{Na}$ ) $^+$  requires  $m/z$  402.1159, found  $m/z$  402.1155 ( $\Delta = -4$  ppm).

**IR (neat)**: 2957, 1781, 1730, 1708, 1507, 1436, 1356, 1165, 1033, 829, 735, 671, 664  $\text{cm}^{-1}$ .

**Dimethyl (S)-2-(2-(2,5-dioxopyrrolidin-1-yl)-2-(2-hydroxyphenoxy)ethyl)malonate (7ac)**

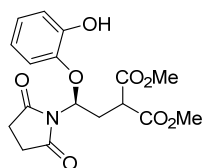

Colorless oil: 27.0 mg, 74% yield, 90% ee;  $R_f = 0.57$  (Pet/EtOAc/MeOH, 1/1/0.1, v/v/v).  $[\alpha]_D^{25} = -7.69$  ( $c = 0.65$ ,  $\text{CHCl}_3$ ); reaction time: 48 h; reaction temperature: 40 °C.

**HPLC** CHIRALPAK OD-H, n-hexane/2-propanol = 80/20, flow rate 1.0 mL/min,  $\lambda = 254$  nm, retention time: 18.610 min (major), 23.237 min (minor).

**$^1\text{H NMR}$**  (400 MHz,  $\text{CDCl}_3$ )  $\delta$  6.96 - 6.87 (m, 2H), 6.79 - 6.75 (m, 1H), 6.14 - 6.10 (m, 2H), 3.76 (s, 3H), 3.74 (s, 3H), 3.678 (dd,  $J = 8.0, 6.4$  Hz, 1H), 3.17 - 3.11 (m, 1H), 2.64 - 2.56 (m, 5H).

**$^{13}\text{C NMR}$**  (100 MHz,  $\text{CDCl}_3$ )  $\delta$  176.6, 169.04, 169.00, 147.9, 142.0, 124.7, 120.5, 116.5, 116.4, 79.3, 53.09, 53.06, 48.1, 31.0, 28.0.

**HRMS** (ESI): exact mass calcd for  $\text{C}_{17}\text{H}_{19}\text{NNaO}_8^+$  ( $\text{M}+\text{Na}$ ) $^+$  requires  $m/z$  388.1003, found  $m/z$  388.1000 ( $\Delta = -3$  ppm).

**IR** (neat): 2957, 1780, 1704, 1499, 1436, 1349, 1262, 1166, 1108, 1041, 818, 751, 666, 634  $\text{cm}^{-1}$ .

**Dimethyl (S)-2-(2-(5-allyl-2-methoxyphenoxy)-2-(2,5-dioxopyrrolidin-1-yl)ethyl)malonate (7ad)**

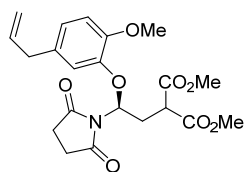

Colorless oil: 31.4 mg, 75% yield, 92% ee;  $R_f = 0.57$  (Pet/EtOAc/MeOH, 1/1/0.1, v/v/v).  $[\alpha]_D^{25} = -7.69$  ( $c = 0.65$ ,  $\text{CHCl}_3$ ); reaction time: 48 h; reaction temperature: 40 °C.

**HPLC** CHIRALPAK OD-H, n-hexane/2-propanol = 70/30, flow rate 1.0 mL/min,  $\lambda = 254$  nm, retention time: 12.052 min (major), 16.298 min (minor).

**$^1\text{H NMR}$**  (400 MHz,  $\text{CDCl}_3$ )  $\delta$  6.78 (d,  $J = 8.0$  Hz, 1H), 6.67 (d,  $J = 2.0$  Hz, 1H), 6.61 (dd,  $J = 8.0, 1.6$  Hz, 1H), 5.94 - 5.86 (m, 2H), 5.06 (t,  $J = 1.6$  Hz, 1H), 5.03 - 5.01 (m, 1H), 3.84 (dd,  $J = 9.6, 5.2$  Hz, 1H), 3.79 (s, 3H), 3.77 (s, 3H), 3.73 (s, 3H), 3.29 (d,  $J = 6.4$  Hz, 2H), 3.25 - 3.18 (m, 1H), 2.66 - 2.51 (m, 5H).

**$^{13}\text{C NMR}$**  (100 MHz,  $\text{CDCl}_3$ )  $\delta$  176.3, 169.2, 169.1, 151.7, 143.1, 137.4, 137.3, 121.2, 121.0, 116.1, 113.4, 80.5, 56.0, 52.9, 52.8, 48.3, 40.0, 31.1, 28.0.

**HRMS** (ESI): exact mass calcd for  $\text{C}_{21}\text{H}_{25}\text{NNaO}_8^+$  requires  $m/z$  442.1472, found  $m/z$  442.1470 ( $\Delta = -2$  ppm).

**IR** (neat): 2955, 1783, 1748, 1709, 1506, 1435, 1354, 1264, 1169, 1034, 911, 820, 728, 663, 648  $\text{cm}^{-1}$ .

**Dimethyl 2-((S)-2-(2,5-dioxopyrrolidin-1-yl)-2-(((8R,9S,13S,14S)-13-methyl-17-oxo-7,8,9,11,12,13,14,15,16,17-decahydro-6H-cyclopenta[a]phenanthren-3-yl)oxy)ethyl) malonate (7ae)**

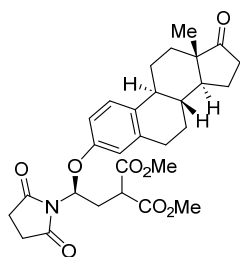

Colorless oil: 39.9mg, 76% yield, >20:1 dr;  $R_f = 0.75$ (Pet/EtOAc/DCM/MeOH, 1/1/1/0.1, v/v/v/v).

$[\alpha]_D^{25} = +16.24$  ( $c = 1.10$ ,  $\text{CHCl}_3$ ); reaction time: 48 h; reaction temperature: 40 °C.

**HPLC** CHIRALPAK AD-H, n-hexane/2-propanol = 60/40, flow rate 1.0 mL/min,  $\lambda = 210$  nm, retention time: 14.543 min (major), 26.708 min (minor).

**$^1\text{H NMR}$**  (400 MHz,  $\text{CDCl}_3$ )  $\delta$  7.16 (d,  $J = 8.4$  Hz, 1H), 6.74 (dd,  $J = 8.4, 2.8$  Hz, 1H), 6.70 (d,  $J = 2.8$  Hz, 1H), 6.09 (dd,  $J = 8.0, 5.2$  Hz, 1H), 3.75 (s, 3H), 3.73 (s, 3H), 3.61 (dd,  $J = 8.4, 6.0$  Hz, 1H), 3.14 - 3.07 (m, 1H), 2.85 (dd,  $J = 8.8, 4.0$  Hz, 1H), 2.63 (s, 4H), 2.53 - 2.46 (m, 1H), 2.38 - 2.33 (m, 1H), 2.24 - 2.18 (m, 1H), 2.15 - 1.93 (m, 4H), 1.66 - 1.35 (m, 7H), 0.89 (s, 3H).

**$^{13}\text{C NMR}$**  (100 MHz,  $\text{CDCl}_3$ )  $\delta$  176.2, 169.0, 168.9, 153.6, 138.3, 134.4, 126.7, 116.7, 113.4, 53.0, 50.5, 48.07, 48.05, 44.1, 38.3, 36.0, 31.7, 31.1, 29.6, 28.1, 26.5, 25.9, 21.7, 14.0.

**HRMS** (ESI): exact mass calcd for  $\text{C}_{29}\text{H}_{35}\text{NNaO}_8^+$  ( $\text{M}+\text{Na}$ ) $^+$  requires  $m/z$  548.2255, found  $m/z$  548.2258 ( $\Delta = +3$  ppm).

**IR** (neat): 2924, 1781, 1731, 1708, 1497, 1435, 1355, 1242, 1155, 1054, 819, 733, 701, 671, 663  $\text{cm}^{-1}$ .

**Dimethyl 2-((*R*)-2-(2,5-dioxopyrrolidin-1-yl)-2-(((*8R,9S,13S,14S*)-13-methyl-17-oxo-7,8,9,11,12,13,14,15,16,17-decahydro-6*H*-cyclopenta[*a*]phenanthren-3-yl)oxy)ethyl) malonate(7ac')**

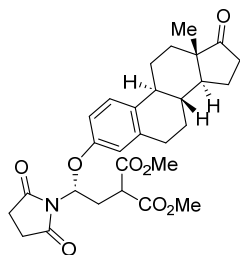

Colorless oil: 34.1mg, 65% yield, >20:1 dr;  $R_f = 0.75$ (Pet/EtOAc/DCM/MeOH, 1/1/1/0.1, v/v/v/v).

$[\alpha]_D^{25} = +5.75$  ( $c = 1.60$ ,  $\text{CHCl}_3$ ); reaction time: 48 h; reaction temperature: 40 °C.

**HPLC** CHIRALPAK AD-H, n-hexane/2-propanol = 60/40, flow rate 1.0 mL/min,  $\lambda = 210$  nm, retention time: 14.545 min (minor), 26.065 min (major).

**$^1\text{H NMR}$**  (400 MHz,  $\text{CDCl}_3$ )  $\delta$  7.15 (d,  $J = 8.4$  Hz, 1H), 6.73 (dd,  $J = 8.8, 2.8$  Hz, 1H), 6.69 (d,  $J = 2.8$  Hz, 1H), 6.07 (dd,  $J = 8.4, 5.6$  Hz, 1H), 3.74 (s, 3H), 3.72 (s, 3H), 3.60 (dd,  $J = 8.4, 6.0$  Hz, 1H), 3.11 - 3.06 (m, 1H), 2.84 (dd,  $J = 9.2, 4.4$  Hz, 1H), 2.63 (s, 4H), 2.57 (dd,  $J = 8.4, 5.6$  Hz, 1H), 2.48 (dd,  $J = 18.8, 8.8$  Hz, 1H), 2.36 - 2.33 (m, 1H), 2.23 - 2.17 (m, 1H), 2.48 (dd,  $J = 19.2, 9.2$  Hz, 1H), 2.05 - 2.19 (m, 3H), 1.63 - 1.34 (m, 6H), 0.89 (s, 3H).

**$^{13}\text{C NMR}$**  (100 MHz,  $\text{CDCl}_3$ )  $\delta$  176.2, 169.0, 168.9, 153.6, 138.3, 134.4, 126.7, 116.7, 113.4, 53.0, 50.5, 48.0, 44.1, 38.3, 35.9, 31.6, 31.0, 29.6, 28.1, 26.5, 25.9, 21.7, 13.9.

**HRMS** (ESI): exact mass calcd for  $\text{C}_{29}\text{H}_{35}\text{NNaO}_8^+$  ( $\text{M}+\text{Na}$ ) $^+$  requires  $m/z$  548.2255, found  $m/z$  548.2253 ( $\Delta = -2$  ppm).

**IR** (neat): 2923, 1781, 1731, 1708, 1497, 1435, 1355, 1242, 1155, 1054, 819, 733, 701, 671, 662  $\text{cm}^{-1}$ .



## Catalytic asymmetric ring-opening of aminocyclopropanes with 4-hydroxycoumarins

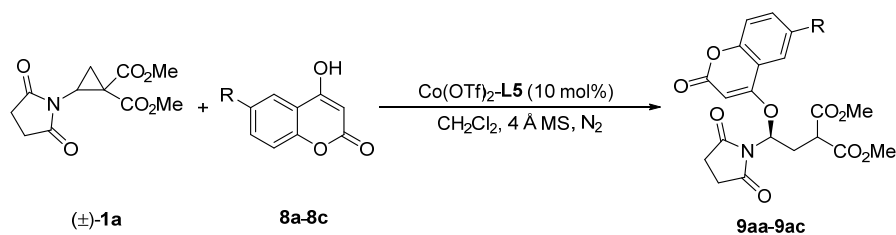

**General method C** - In a dry reaction tube, a mixture of  $\text{Co}(\text{OTf})_2$  (3.6 mg, 0.01 mmol, 10 mol%), ligand **L5** (7.8 mg, 0.011 mmol, 11 mol%), and aminocyclopropane **1a** (0.22 mmol) in DCM (3.0 mL) were stirred at room temperature for 30 minutes under the atmosphere of nitrogen. Then isoquinoline substrate **8** (0.1 mmol) in DCM (1.0 mL) was added to the mixture of catalyst via a syringe. Subsequently, the reaction was stirred at 40 °C or 60 °C or 80 °C for 8-24 h. After the reaction was complete (monitored by TLC), the reaction was filtered through a glass funnel within layer of silica gel (100-200 mesh) and purified by flash column chromatography (Pet/EtOAc/MeOH, v/v/v, 3:1:0.1-1:2:0.1) to give the product **9**.

**Dimethyl (S)-2-(2-(2,5-dioxopyrrolidin-1-yl)-2-((2-oxo-2H-chromen-4-yl)oxy)ethyl) malonate (9aa)**

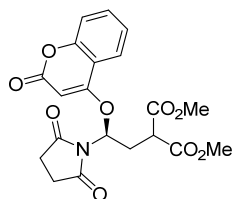

Colorless oil: 39.8mg, 95% yield, 96% ee;  $R_f = 0.63$  (Pet/EtOAc/MeOH, 1/2/0.1, v/v/v).  $[\alpha]_D^{25} = +2.25$  ( $c = 0.60$ ,  $\text{CHCl}_3$ ); reaction time: 24 h; reaction temperature: 40 °C.

**HPLC** CHIRALPAK IA, n-hexane/2-propanol = 60/40, flow rate 1.0 mL/min,  $\lambda = 254$  nm, retention time: 11.072 min (major), 18.690 min (minor).

**$^1\text{H NMR}$**  (400 MHz,  $\text{CDCl}_3$ )  $\delta$  7.81 - 7.77 (m, 1H), 7.52 - 7.48 (m, 1H), 7.25 - 7.21 (m, 2H), 6.20 (dd,  $J = 7.6, 6.0$  Hz, 1H), 5.80 (s, 1H), 3.70 (s, 3H), 3.69 (s, 3H), 3.50 (t,  $J = 7.2$  Hz, 1H), 3.20 - 3.13 (m, 1H), 2.81 - 2.74 (m, 1H), 2.72 (s, 4H).

**$^{13}\text{C NMR}$**  (100 MHz,  $\text{CDCl}_3$ )  $\delta$  175.6, 168.52, 168.47, 162.5, 162.1, 153.5, 132.9, 124.3, 123.4, 116.8, 115.1, 92.5, 76.9, 53.23, 53.20, 47.8, 30.4, 28.1.

**HRMS** (ESI): exact mass calcd for  $\text{C}_{20}\text{H}_{19}\text{NNaO}_9^+$  ( $\text{M}+\text{Na}$ ) $^+$  requires  $m/z$  440.0952, found  $m/z$  440.0949 ( $\Delta = -3$  ppm).

**IR (neat)**: 2922, 1782, 1708, 1623, 1435, 1350, 1238, 1156, 1102, 1031, 918, 817, 766, 728, 671, 664  $\text{cm}^{-1}$ .

**Dimethyl (S)-2-(2-(2,5-dioxopyrrolidin-1-yl)-2-((6-methyl-2-oxo-2H-chromen-4-yl)oxy)ethyl)malonate (9ab)**

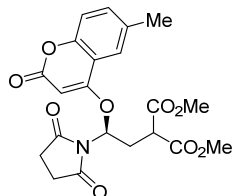

Colorless oil: 35.3 mg, 82% yield, 96% ee;  $R_f = 0.63$  (Pet/EtOAc/MeOH, 1/2/0.1, v/v/v).  $[\alpha]_D^{24} = +3.60$  ( $c = 0.45$ ,  $\text{CHCl}_3$ ); reaction time: 12 h; reaction temperature: 60 °C.

**HPLC** CHIRALPAK IA, n-hexane/2-propanol = 60/40, flow rate 1.0 mL/min,  $\lambda = 254$  nm, retention time: 10.597 min (major), 16.545 min (minor).

**$^1\text{H NMR}$**  (600 MHz,  $\text{CDCl}_3$ )  $\delta$  7.59 (s, 1H), 7.34 (d,  $J = 8.4$  Hz, 1H), 7.17 (d,  $J = 8.4$  Hz, 1H), 6.22 (t,  $J = 6.6$  Hz, 1H), 5.81 (s, 1H), 3.746 (s, 3H), 3.739 (s, 3H), 3.53 (t,  $J = 7.2$ , 1H), 3.22 - 3.17 (m, 1H), 2.86 - 2.80 (m, 1H), 2.75 (t,  $J = 13.2$ , 4H) 2.41 (s, 3H).

**$^{13}\text{C NMR}$**  (150 MHz,  $\text{CDCl}_3$ )  $\delta$  175.6, 168.5, 162.5, 162.4, 151.7, 134.1, 134.0, 123.0, 116.6, 114.7, 92.4, 55.3, 53.2, 47.8, 30.5, 28.1, 21.0.

**HRMS** (ESI): exact mass calcd for  $\text{C}_{21}\text{H}_{21}\text{NNaO}_9^+$  ( $\text{M}+\text{Na}$ ) $^+$  requires  $m/z$  454.1109, found  $m/z$  454.1106 ( $\Delta = -3$  ppm).

**IR (neat)**: 2962, 1782, 1713, 1628, 1434, 1350, 1258, 1156, 1015, 795, 732, 703, 672, 663  $\text{cm}^{-1}$ .

**Dimethyl (S)-2-(2-((6-bromo-2-oxo-2H-chromen-4-yl)oxy)-2-(2,5-dioxopyrrolidin-1-yl)ethyl)malonate (9ac)**

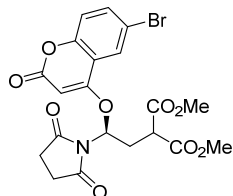

Colorless oil: 37.6 mg, 76% yield, 97% ee;  $R_f = 0.75$  (Pet/EtOAc/MeOH, 1/2/0.1, v/v/v).  $[\alpha]_D^{25} = +7.80$  ( $c = 1.00$ ,  $\text{CHCl}_3$ ); reaction time: 8 h; reaction temperature: 80 °C.

**HPLC** CHIRALPAK IA, n-hexane/2-propanol = 60/40, flow rate 1.0 mL/min,  $\lambda = 254$  nm, retention time: 13.178 min (major), 19.595 min (minor).

**$^1\text{H NMR}$**  (600 MHz,  $\text{CDCl}_3$ )  $\delta$  7.86 (d,  $J = 2.4$  Hz, 1H), 7.61 (dd,  $J = 9.0, 2.4$  Hz, 1H), 7.14 (d,  $J = 9.0$  Hz, 1H), 6.21 (t,  $J = 7.2$  Hz, 1H), 5.85 (s, 1H), 3.76 (s, 3H), 3.74 (s, 3H), 3.50 (t,  $J = 7.2$ , 1H), 3.21 - 3.16 (m, 1H), 2.87 - 2.82 (m, 1H), 2.79 - 2.76 (m, 4H).

**$^{13}\text{C NMR}$**  (150 MHz,  $\text{CDCl}_3$ )  $\delta$  175.6, 168.4, 161.4, 161.3, 152.4, 135.8, 125.9, 118.6, 117.2, 116.6, 93.2, 53.3, 47.8, 30.3, 28.2.

**HRMS** (ESI): exact mass calcd for  $\text{C}_{20}\text{H}_{18}\text{BrNNaO}_9^+$  ( $\text{M}+\text{Na}$ ) $^+$  requires  $m/z$  518.0057, found  $m/z$  518.0055 ( $\Delta = -2$  ppm).

**IR** (neat): 2962, 1782, 1718, 1622, 1427, 1346, 1258, 1162, 1012, 792, 702, 672, 662  $\text{cm}^{-1}$ .

## Catalytic asymmetric ring-opening of aminocyclopropanes with 1,3-cyclodiones

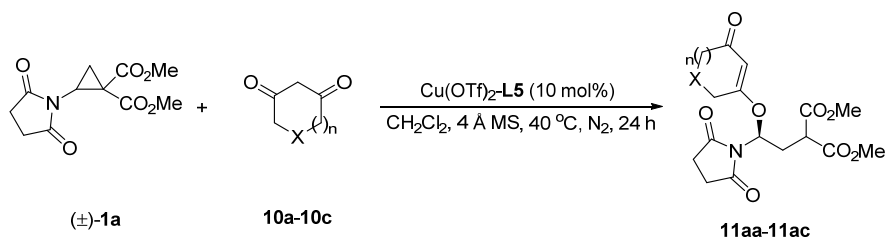

**General method D** - In a dry reaction tube, a mixture of  $\text{Cu}(\text{OTf})_2$  (3.6 mg, 0.01 mmol, 10 mol%), ligand **L5** (7.8 mg, 0.011 mmol, 11 mol%), and aminocyclopropane **1a** (0.22 mmol) in DCM (3.0 mL) were stirred at room temperature for 30 minutes under the atmosphere of nitrogen. Then isoquinoline substrate **10** (0.1 mmol) in DCM (1.0 mL) was added to the mixture of catalyst via a syringe. Subsequently, the reaction was stirred at 40 °C for 24 h. After the reaction was complete (monitored by TLC), the reaction was filtered through a glass funnel within layer of silica gel (100-200 mesh) and purified by flash column chromatography (Pet/EtOAc/DCM/MeOH, v/v/v/v, 5:1:1:0.1-1:1:1:0.1) to give the product **11**.

**Dimethyl (S)-2-(2-(2,5-dioxopyrrolidin-1-yl)-2-((3-oxocyclohex-1-en-1-yl)oxy)ethyl) malonate (11aa)**

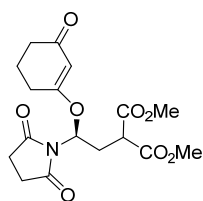

Colorless oil: 29.3 mg, 80% yield, 97% ee;  $R_f = 0.29$  (Pet/EtOAc/DCM/MeOH, 1/1/1/0.1, v/v/v/v).

$[\alpha]_D^{25} = -4.20$  ( $c = 0.60$ ,  $\text{CHCl}_3$ ); reaction time: 24 h; reaction temperature: 40 °C.

**HPLC** CHIRALPAK IA, n-hexane/2-propanol = 60/40, flow rate 1.0 mL/min,  $\lambda = 254$  nm, retention time: 8.938 min (major), 11.858 min (minor).

**$^1\text{H NMR}$**  (600 MHz,  $\text{CDCl}_3$ )  $\delta$  5.89 (t,  $J = 6.6$  Hz, 1H), 5.36 (s, 1H), 3.73 (s, 3H), 3.71 (s, 3H), 3.43 (t,  $J = 7.8$  Hz, 1H), 2.94 - 2.89 (m, 1H), 2.69 (s, 4H), 2.64 - 2.59 (m, 1H), 2.39 - 2.32 (m, 2H), 2.29 - 2.26 (m, 2H), 1.95 - 1.90 (m, 2H).

**$^{13}\text{C NMR}$**  (150 MHz,  $\text{CDCl}_3$ )  $\delta$  199.3, 175.6, 174.1, 168.51, 168.47, 104.5, 76.4, 53.1, 53.0, 47.7, 36.7, 30.3, 29.7, 28.3, 28.0, 20.9.

**HRMS** (ESI): exact mass calcd for  $\text{C}_{17}\text{H}_{21}\text{NNaO}_8^+$  ( $\text{M}+\text{Na}$ ) $^+$  requires  $m/z$  390.1159, found  $m/z$  390.1162 ( $\Delta = +3$  ppm).

**IR** (neat): 2955, 1781, 1708, 1651, 1609, 1433, 1375, 1166, 1040, 915, 818, 728, 670, 663  $\text{cm}^{-1}$ .

Dimethyl

(S)-2-(2-(2,5-dioxopyrrolidin-1-yl)-2-((5-oxo-5,6-dihydro-2H-pyran-3-yl)oxy)ethyl)malonate (11ab)

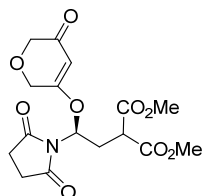

Colorless oil: 30.3 mg, 82% yield, 96% ee;  $R_f = 0.43$  (Pet/EtOAc/DCM/MeOH, 1/1/1/0.1, v/v/v/v).

$[\alpha]_D^{23} = -18.84$  ( $c = 0.52$ ,  $\text{CHCl}_3$ ); reaction time: 24 h; reaction temperature: 40 °C.

HPLC CHIRALPAK IA, n-hexane/2-propanol = 60/40, flow rate 1.0 mL/min,  $\lambda = 254$  nm, retention time: 12.855 min (major), 16.557 min (minor).

$^1\text{H NMR}$  (400 MHz,  $\text{CDCl}_3$ )  $\delta$  5.98 (t,  $J = 6.8$  Hz, 1H), 5.58 (s, 1H), 4.24 (dd,  $J = 25.2, 16.0$  Hz, 2H), 4.05 (s, 2H), 3.76 (s, 3H), 3.75 (s, 3H), 3.43 (t,  $J = 7.2$  Hz, 1H), 3.00 - 2.93 (m, 1H), 2.74 (s, 4H), 2.70 - 2.67 (m, 1H).

$^{13}\text{C NMR}$  (100 MHz,  $\text{CDCl}_3$ )  $\delta$  194.6, 175.4, 171.5, 168.5, 168.4, 102.0, 71.5, 65.2, 53.23, 53.20, 47.7, 30.1, 28.1.

HRMS (ESI): exact mass calcd for  $\text{C}_{16}\text{H}_{19}\text{NNaO}_9^+$  ( $\text{M}+\text{Na}$ ) $^+$  requires  $m/z$  392.0952, found  $m/z$  392.0952 ( $\Delta = 0$  ppm).

IR (neat): 2922, 1783, 1710, 1669, 1616, 1436, 1359, 1165, 1047, 916, 818, 729, 671, 663  $\text{cm}^{-1}$ .

**Dimethyl (S)-2-(2-(2,5-dioxopyrrolidin-1-yl)-2-((3-oxocyclopent-1-en-1-yl)oxy)ethyl) malonate**

**(11ac)**

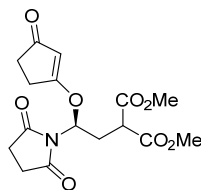

White solid: 25.1 mg, 71% yield, 93% ee; m.p.: 113.8 - 114.5 °C;  $R_f = 0.29$  (Pet/EtOAc/DCM/MeOH, 1/1/1/0.1, v/v/v/v).  $[\alpha]_D^{25} = -26.33$  (c = 1.10, CHCl<sub>3</sub>); reaction time: 24 h; reaction temperature: 40 °C.

**HPLC** CHIRALPAK IA, n-hexane/2-propanol = 60/40, flow rate 1.0 mL/min,  $\lambda = 254$  nm, retention time: 9.870 min (major), 13.223 min (minor).

**<sup>1</sup>H NMR** (600 MHz, CDCl<sub>3</sub>)  $\delta$  5.91 (dd,  $J = 7.2, 6.6$  Hz, 1H), 5.40 (s, 1H), 3.75 (s, 3H), 3.74 (s, 3H), 3.47 (dd,  $J = 7.8, 6.6$  Hz, 1H), 3.04 - 2.99 (m, 1H), 2.73 (s, 4H), 2.71 - 2.67 (m, 1H), 2.65 - 2.54 (m, 2H), 2.47 - 2.37 (m, 2H).

**<sup>13</sup>C NMR** (150 MHz, CDCl<sub>3</sub>)  $\delta$  205.7, 186.5, 175.6, 168.5, 106.9, 79.4, 53.18, 53.15, 47.7, 34.3, 30.2, 28.3, 28.1.

**HRMS** (ESI): exact mass calcd for C<sub>16</sub>H<sub>19</sub>NNaO<sub>8</sub><sup>+</sup> (M+Na)<sup>+</sup> requires m/z 376.1003, found m/z 376.0999 ( $\Delta = -4$  ppm).

**IR (neat)**: 2920, 1783, 1731, 1703, 1594, 1431, 1340, 1249, 1166, 1041, 913, 813, 664, 639 cm<sup>-1</sup>.



## X-ray data of 3ak

Figure S1. X-Ray crystal structure of **3ak** (Recrystallization solvent: DCM/EE). (CCDC: 2307260)

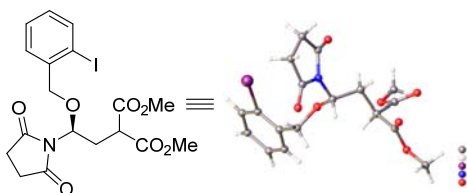

Table S4. Crystal data and structure refinement for (*S*)-**3ak**

|                                             |                                                  |
|---------------------------------------------|--------------------------------------------------|
| Identification code                         | ( <i>S</i> )- <b>3ak</b>                         |
| Empirical formula                           | C <sub>18</sub> H <sub>20</sub> INO <sub>7</sub> |
| Formula weight                              | 489.25                                           |
| Temperature/K                               | 150.00(10)                                       |
| Crystal system                              | monoclinic                                       |
| Space group                                 | P21                                              |
| a/Å                                         | 11.68310(10)                                     |
| b/Å                                         | 6.78090(10)                                      |
| c/Å                                         | 12.62400(10)                                     |
| $\alpha$ /°                                 | 90                                               |
| $\beta$ /°                                  | 104.7010(10)                                     |
| $\gamma$ /°                                 | 90                                               |
| Volume/Å <sup>3</sup>                       | 967.358(19)                                      |
| Z                                           | 2                                                |
| $\rho$ calc/g/cm <sup>3</sup>               | 1.680                                            |
| $\mu$ /mm <sup>-1</sup>                     | 13.363                                           |
| F(000)                                      | 488.0                                            |
| Crystal size/mm <sup>3</sup>                | 0.25 × 0.2 × 0.18                                |
| Radiation                                   | CuK $\alpha$ ( $\lambda$ = 1.54178)              |
| 2 $\theta$ range for data collection/°      | 7.24 to 143.678                                  |
| Index ranges                                | -12 ≤ h ≤ 14, -8 ≤ k ≤ 8, -15 ≤ l ≤ 15           |
| Reflections collected                       | 25397                                            |
| Independent reflections                     | 3749 [Rint = 0.0605, Rsigma = 0.0299]            |
| Data/restraints/parameters                  | 3749/1/246                                       |
| Goodness-of-fit on F <sup>2</sup>           | 1.046                                            |
| Final R indexes [I ≥ 2 $\sigma$ (I)]        | R1 = 0.0286, wR2 = 0.0758                        |
| Final R indexes [all data]                  | R1 = 0.0288, wR2 = 0.0761                        |
| Largest diff. peak/hole / e Å <sup>-3</sup> | 0.95/-0.86                                       |
| Flack parameter                             | -0.018(6)                                        |

## Gram-scale synthesis of **3aa**

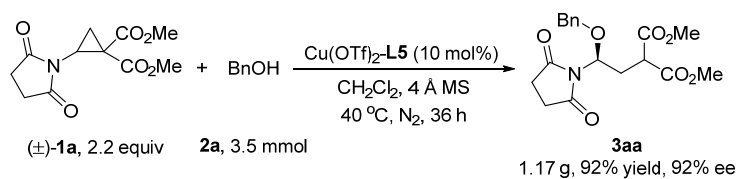

In a dry reaction tube, a mixture of  $\text{Cu}(\text{OTf})_2$  (126.5 mg, 0.35 mmol, 10 mol%), ligand **L5** (271.4 mg, 0.39 mmol, 11 mol%), 4 Å MS (350 mg), and aminocyclopropane **1a** (1.964 g, 7.7 mmol) in DCM (35 mL) were stirred at room temperature for 2 h under the atmosphere of nitrogen. Then, phenylmethanol **2a** (378.2 mg, 3.5 mmol) in DCM (35 mL) was added to the mixture of catalyst via a syringe. Subsequently, the reaction was stirred at 40 °C for 36 h. After the reaction was complete (monitored by TLC), the reaction was filtered through a glass funnel within layer of silica gel (100-200 mesh) and purified by flash column chromatography (Pet/EtOAc/MeOH, v/v/v, 10:1:0.1-5:1:0.1) to give the product **3aa** as a colorless oil (1.17 g, 92% yield, 92% ee).

**Figure S2.** HPLC spectra of **9aa** on a gram-scale

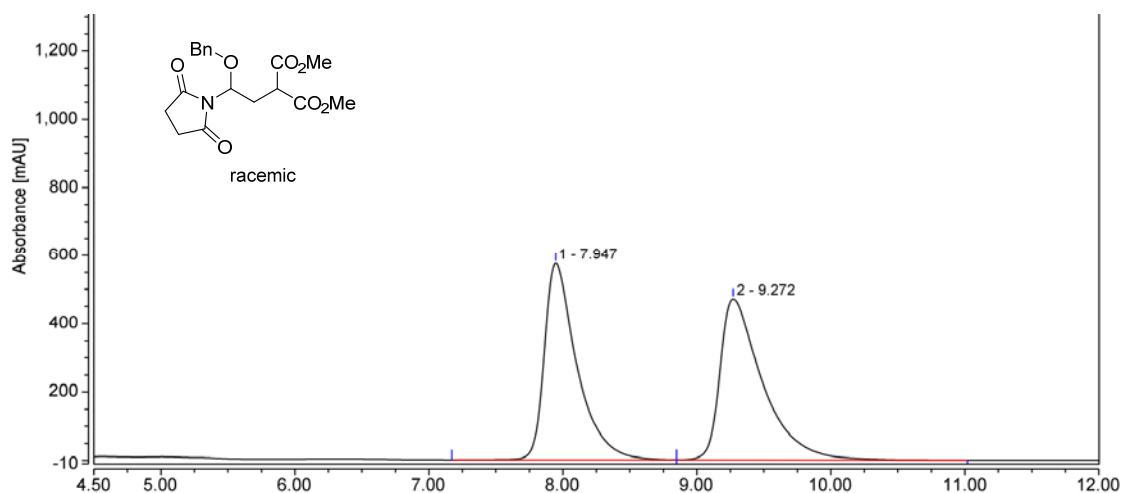

| Peak          | Retention Time<br>min | Area<br>mAU*min | Height<br>mAU   | Area<br>%     | Height<br>%   |
|---------------|-----------------------|-----------------|-----------------|---------------|---------------|
| 1             | 7.947                 | 162.318         | 574.379         | 48.36         | 55.00         |
| 2             | 9.272                 | 173.345         | 469.941         | 51.64         | 45.00         |
| <b>Total:</b> |                       | <b>335.663</b>  | <b>1044.320</b> | <b>100.00</b> | <b>100.00</b> |

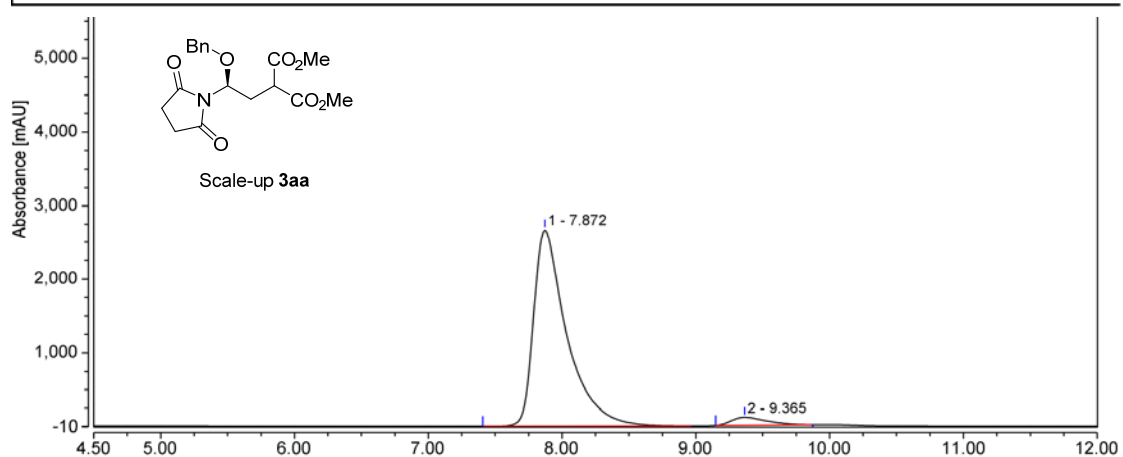

| Peak          | Retention Time<br>min | Area<br>mAU*min | Height<br>mAU   | Area<br>%     | Height<br>%   |
|---------------|-----------------------|-----------------|-----------------|---------------|---------------|
| 1             | 7.872                 | 766.931         | 2673.830        | 95.88         | 96.11         |
| 2             | 9.365                 | 32.923          | 108.142         | 4.12          | 3.89          |
| <b>Total:</b> |                       | <b>799.854</b>  | <b>2781.972</b> | <b>100.00</b> | <b>100.00</b> |

## Kinetic resolution of **1a**

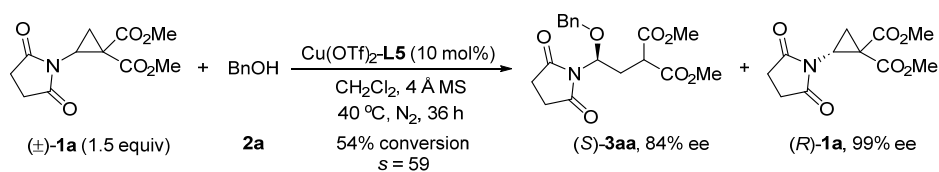

In a dry reaction tube, a mixture of  $\text{Cu}(\text{OTf})_2$  (3.6 mg, 0.01 mmol, 10 mol%), ligand **L5** (7.8 mg, 0.011 mmol, 11 mol%), 4 Å MS (10 mg), and aminocyclopropane **1a** (0.15 mmol) in DCM (3.0 mL) were stirred at room temperature for 30 minutes under the atmosphere of nitrogen. Then benzyl alcohol **2a** (0.1 mmol) in DCM (1.0 mL) was added to the mixture of catalyst via a syringe. Subsequently, the reaction was stirred at 40 °C for 36 h. Then, the reaction was filtered through a glass funnel within layer of silica gel (100-200 mesh) and purified by flash column chromatography (Pet/EtOAc/MeOH, v/v/v, 10:1:0.1-5:1:0.1) to give the product **3aa** with 84% ee and the *R*-**1a** with 99% ee,  $s = 59.2$ .

$C = ee^1/(ee^3 + ee^1)$ ,  $s = \ln[(1 - C)(1 - ee^1)]/\ln[(1 - C)(1 + ee^1)]$ , where  $ee^1 = ee$  of the recovered substrate and  $ee^3 = ee$  of the product.

The absolute configuration of product *R*-**1a** was determined by comparison the HPLC spectra with the prepared reference sample.<sup>[1-2]</sup>

### HPLC Spectrum of (±)-1a

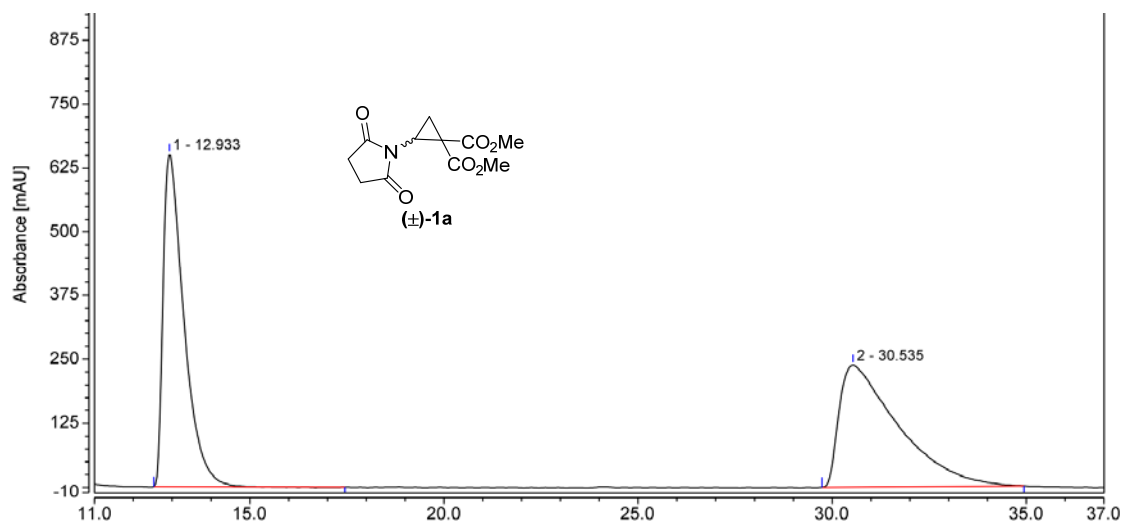

| Peak          | Retention Time<br>min | Area<br>mAU*min | Height<br>mAU  | Area<br>%     | Height<br>%   |
|---------------|-----------------------|-----------------|----------------|---------------|---------------|
| 1             | 12.933                | 403.438         | 651.588        | 49.04         | 73.23         |
| 2             | 30.535                | 419.221         | 238.220        | 50.96         | 26.77         |
| <b>Total:</b> |                       | <b>822.659</b>  | <b>889.809</b> | <b>100.00</b> | <b>100.00</b> |

### HPLC Spectrum of (*R*)-1a

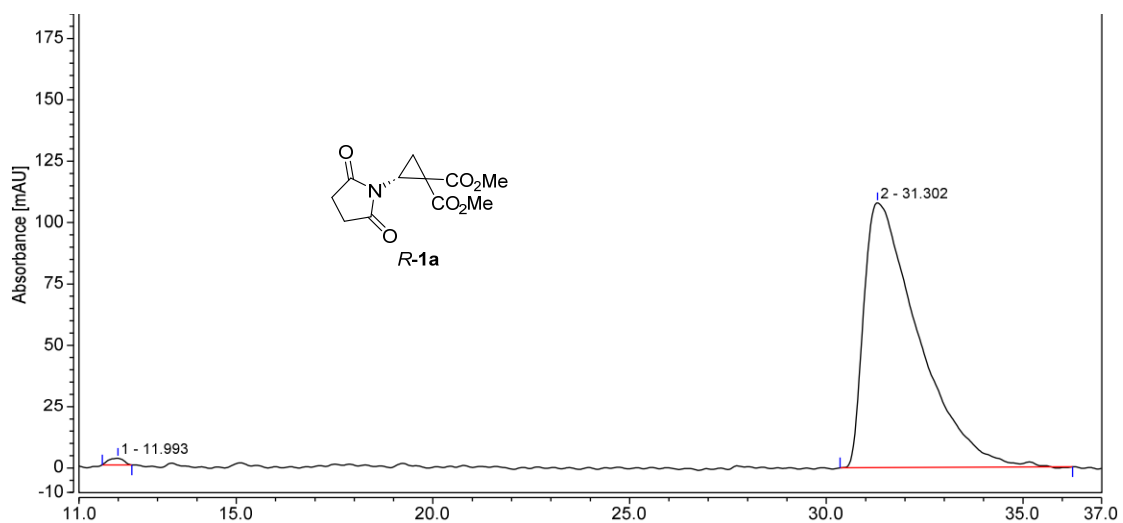

| Peak          | Retention Time<br>min | Area<br>mAU*min | Height<br>mAU  | Area<br>%     | Height<br>%   |
|---------------|-----------------------|-----------------|----------------|---------------|---------------|
| 1             | 11.993                | 1.219           | 2.694          | 0.70          | 2.44          |
| 2             | 31.302                | 172.997         | 107.911        | 99.30         | 97.56         |
| <b>Total:</b> |                       | <b>174.216</b>  | <b>110.605</b> | <b>100.00</b> | <b>100.00</b> |

Figure S3 HPLC of *R*-1a

## Ring-opening of **3aa**

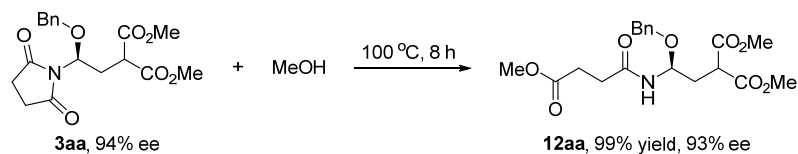

In a dry reaction tube, **3aa** (0.1 mmol) in MeOH (0.5 mL) was stirred at 100 °C for 8 h. After the reaction was complete (monitored by TLC), the reaction was filtered through a glass funnel within layer of silica gel (100-200 mesh) and purified by flash column chromatography (DCM/MeOH, v/v, 100:1-20:1) to give the product **12aa**.

## Dimethyl (*S*)-2-(2-(benzyloxy)-2-(4-methoxy-4-oxobutanamido)ethyl)malonate (**12aa**)

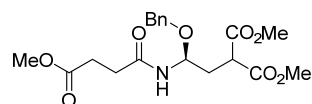

Colorless oil: 39.1 mg, 99% yield, 93% ee;  $R_f = 0.50$  (DCM/MeOH, 20/1, v/v).  $[\alpha]_D^{25} = +2.33$  ( $c = 1.30$ , CHCl<sub>3</sub>); reaction time: 8 h; reaction temperature: 100 °C.

**HPLC** CHIRALPAK IG, n-hexane/2-propanol = 70/30, flow rate 1.0 mL/min,  $\lambda = 210$  nm, retention time: 14.377 min (minor), 17.748 min (major).

**<sup>1</sup>H NMR** (400 MHz, CDCl<sub>3</sub>)  $\delta$  7.34 - 7.23 (m, 5H), 6.27 (d,  $J = 9.6$  Hz, 1H), 5.43 - 5.37 (m, 1H), 4.57 (d,  $J = 11.6$  Hz, 1H), 6.27 (d,  $J = 11.6$  Hz, 1H), 3.68 (s, 3H), 3.67 (s, 3H), 3.64 (s, 3H), 3.56 (t,  $J = 7.2$  Hz, 1H), 2.68 - 2.64 (m, 2H), 2.68 - 2.64 (m, 2H), 2.46 (t,  $J = 6.4$  Hz, 2H), 2.34 - 2.22 (m, 2H).

**<sup>13</sup>C NMR** (100 MHz, CDCl<sub>3</sub>)  $\delta$  173.4, 171.8, 169.7, 169.5, 137.9, 128.4, 128.1, 127.8, 70.5, 52.83, 52.76, 52.0, 48.2, 34.4, 31.1, 29.1.

**HRMS** (ESI): exact mass calcd for C<sub>19</sub>H<sub>25</sub>NNaO<sub>8</sub><sup>+</sup> (M+Na)<sup>+</sup> requires  $m/z$  418.1472, found  $m/z$  418.1467 ( $\Delta = -5$  ppm).

**IR** (neat): 3311, 2954, 2355, 1732, 1662, 1528, 1436, 1349, 1160, 1058, 916, 733, 699 cm<sup>-1</sup>.

## Decarboxylation and ring-opening of **3aa**

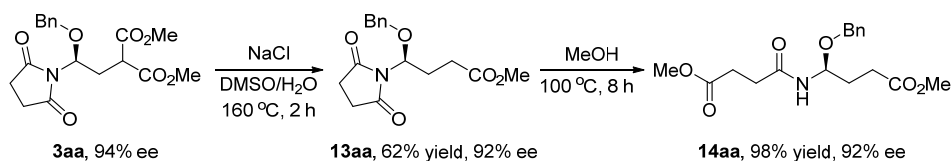

To the solution of **3aa** (0.3 mmol, 1.0 equiv) in DMSO (1 mL) was added NaCl (36.5 mg, 0.63 mmol, 2.1 equiv) and H<sub>2</sub>O (10  $\mu$ L). The reaction was stirred at 160 °C for 2 h. The organic layer was extracted with EtOAc for 3 times, and the collected organic layer was dried over Na<sub>2</sub>SO<sub>4</sub>. After removing the solvent under reduced pressure, the reaction was filtered through a glass funnel within layer of silica gel (100-200 mesh) and purified by flash column chromatography (Pet/EtOAc/MeOH, v/v/v, 10:1:0.1-3:1:0.1) to give the product **13aa**.

Then, in a dry reaction tube, **13aa** (0.1 mmol) in MeOH (0.5 mL) was stirred at 100 °C for 8 h. After the reaction was complete (monitored by TLC), the reaction was filtered through a glass funnel within layer of silica gel (100-200 mesh) and purified by flash column chromatography (DCM/MeOH, v/v, 100:1-20:1) to give the product **14aa**.

**Methyl (S)-4-(benzyloxy)-4-(2,5-dioxopyrrolidin-1-yl)butanoate (13aa)**

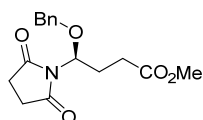

Colorless oil: 47.3 mg, 62% yield, 92% ee;  $R_f = 0.50$  (Pet/EtOAc/ MeOH, 3/1/0.1, v/v/v).  $[\alpha]_D^{25} = -2.45$  ( $c = 1.26$ ,  $\text{CHCl}_3$ ); reaction time: 2 h; reaction temperature: 160 °C.

**HPLC** CHIRALPAK IG, n-hexane/2-propanol = 70/30, flow rate 1.0 mL/min,  $\lambda = 210$  nm, retention time: 9.885 min (minor), 13.583 min (major).

**$^1\text{H NMR}$**  (600 MHz,  $\text{CDCl}_3$ )  $\delta$  7.34 - 7.26 (m, 5H), 5.35 (t,  $J = 7.2$  Hz, 1H), 4.65 (d,  $J = 12.6$  Hz, 1H), 4.45 (d,  $J = 12.6$  Hz, 1H), 3.63 (s, 3H), 2.71 - 2.63 (m, 1H), 2.42 (dd,  $J = 16.8, 7.8$  Hz, 1H), 2.38 (s, 4H), 2.35 - 2.30 (m, 1H), 2.19 - 2.14 (m, 1H).

**$^{13}\text{C NMR}$**  (150 MHz,  $\text{CDCl}_3$ )  $\delta$  176.8, 172.9, 137.3, 128.4, 128.1, 128.0, 81.7, 72.4, 51.8, 30.0, 27.9, 27.4.

**HRMS** (ESI): exact mass calcd for  $\text{C}_{16}\text{H}_{19}\text{NNaO}_5^+$  ( $\text{M}+\text{Na}$ ) $^+$  requires  $m/z$  328.1155, found  $m/z$  328.1153 ( $\Delta = -2$  ppm).

**IR** (neat): 2950, 1778, 1732, 1701, 1436, 1350, 1163, 1088, 819, 739, 699, 663, 633  $\text{cm}^{-1}$ .



**Methyl (S)-4-(benzyloxy)-4-(4-methoxy-4-oxobutanamido)butanoate (14aa)**

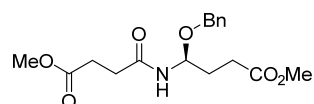

Colorless oil: 33.0 mg, 98% yield, 92% ee;  $R_f = 0.50$  (DCM/MeOH, 20/1, v/v).  $[\alpha]_D^{25} = +3.36$  ( $c = 1.26$ ,  $\text{CHCl}_3$ ); reaction time: 8 h; reaction temperature: 100 °C.

**HPLC** CHIRALPAK IG, n-hexane/2-propanol = 70/30, flow rate 1.0 mL/min,  $\lambda = 210$  nm, retention time: 16.375 min (major), 19.238 min (minor).

**$^1\text{H NMR}$**  (400 MHz,  $\text{CDCl}_3$ )  $\delta$  7.35 - 7.27 (m, 5H), 6.19 (d,  $J = 9.6$  Hz, 1H), 5.38 - 5.32 (m, 1H), 4.60 (d,  $J = 12.0$  Hz, 1H), 4.50 (d,  $J = 11.6$  Hz, 1H), 3.68 (s, 3H), 3.64 (s, 3H), 2.68 (t,  $J = 6.8$  Hz, 1H), 2.51 - 2.45 (m, 3H), 2.40 - 2.32 (m, 1H), 2.04 - 1.93 (m, 2H).

**$^{13}\text{C NMR}$**  (100 MHz,  $\text{CDCl}_3$ )  $\delta$  173.9, 173.4, 171.9, 138.2, 128.7, 128.5, 128.0, 127.8, 127.1, 78.7, 70.4, 52.0, 51.9, 31.2, 30.5, 29.6, 29.2.

**HRMS** (ESI): exact mass calcd for  $\text{C}_{17}\text{H}_{23}\text{NNaO}_6^+$  ( $\text{M}+\text{Na}$ ) $^+$  requires  $m/z$  360.1418, found  $m/z$  360.1420 ( $\Delta = +2$  ppm).

**IR** (neat): 3305, 2953, 1734, 1658, 1535, 1436, 1361, 1165, 1071, 1022, 919, 732, 698  $\text{cm}^{-1}$ .

## The transformations of the product **3aa**

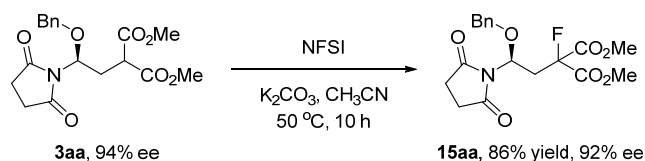

To a solution of **3aa** (36.3 mg, 0.1 mmol, 1.0 equiv) in MeCN (1.0 mL) was added  $\text{K}_2\text{CO}_3$  (15.2 mg, 0.11 mmol, 1.1 equiv), NFSI (35 mg, 0.11 mmol, 1.1 equiv) was then added. After stirring at 50 °C 10 h, the crude compound was purified by column chromatography on silica gel (Pet/EtOAc/DCM/MeOH, 3/1/1/0.1, v/v/v/v), affording the desired compound **15aa**.

### Dimethyl (*S*)-2-(2-(benzyloxy)-2-(2,5-dioxopyrrolidin-1-yl)ethyl)-2-fluoromalonate (**15aa**)

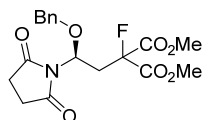

Colorless oil: 32.8 mg, 86% yield, 92% ee;  $R_f = 0.50$  (Pet/EtOAc/DCM/MeOH, 3/1/1/0.1, v/v/v/v).

$[\alpha]_D^{24} = 11.2$  ( $c = 0.25$ ,  $\text{CHCl}_3$ ); reaction time: 10 h; reaction temperature: 50 °C.

**HPLC** CHIRALPAK IG, n-hexane/2-propanol = 60/40, flow rate 1.0 mL/min,  $\lambda = 210$  nm, retention time: 14.198 min (minor), 17.495 min (major).

**$^1\text{H}$  NMR** (400 MHz,  $\text{CDCl}_3$ )  $\delta$  7.32 - 7.24 (m, 5H), 5.58 (dd,  $J = 8.8, 4.0$  Hz, 1H), 4.64 (d,  $J = 12.4$  Hz, 1H), 4.38 (d,  $J = 12.4$  Hz, 1H), 3.81 (s, 3H), 3.69 (s, 3H), 3.57 - 3.43 (m, 1H), 2.64 - 2.57 (m, 1H), 2.36 (s, 4H).

**$^{13}\text{C}$  NMR** (100 MHz,  $\text{CDCl}_3$ )  $\delta$  176.4, 166.1 (d,  $J_{\text{C-F}} = 23.0$  Hz), 165.9 (d,  $J_{\text{C-F}} = 21.0$  Hz), 137.1, 128.4, 128.1, 127.9, 93.4, 91.4, 72.7, 53.8 (d,  $J_{\text{C-F}} = 3.0$  Hz), 53.4, (d,  $J_{\text{C-F}} = 2.0$  Hz), 37.2 (d,  $J_{\text{C-F}} = 20.0$  Hz), 28.0.

**$^9\text{F}$  NMR** (376 MHz,  $\text{CDCl}_3$ ): -167.6.

**HRMS** (ESI): exact mass calcd for  $\text{C}_{18}\text{H}_{20}\text{FNNaO}_7^+$  ( $\text{M}+\text{Na}$ ) $^+$  requires  $m/z$  404.1116, found  $m/z$  404.1112 ( $\Delta = -4$  ppm).

**IR** (neat): 2957, 1753, 1706, 1436, 1352, 1303, 1255, 1178, 1103, 912, 812, 729, 699  $\text{cm}^{-1}$ .

## The transformations of the product **12aa**

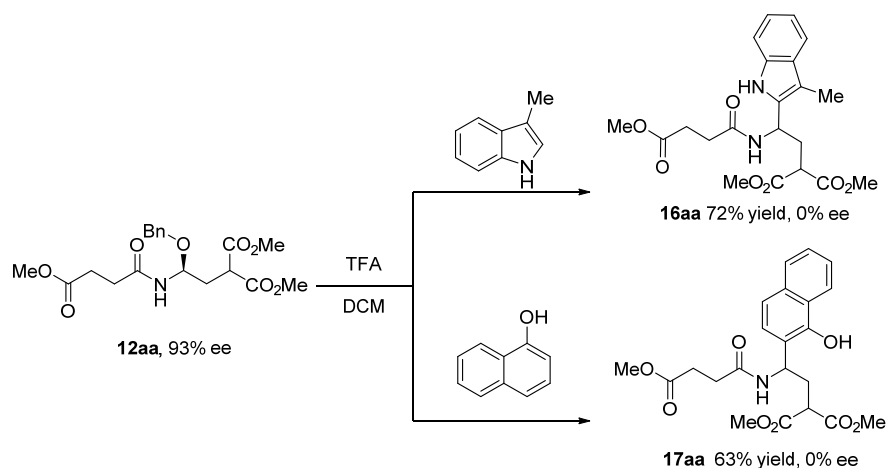

To a solution of **12aa** (39.5 mg, 0.1 mmol, 1.0 equiv) in DCM (1.0 mL) was added 3-methyl-1H-indole (14.4 mg, 0.11 mmol, 1.1 equiv), TFA (23.0  $\mu$ L, 0.3 mmol, 3 equiv) was then added. The reaction mixture was stirred at room temperature for 2 hour, the crude compound was purified by column chromatography on silica gel (Pet/EtOAc/DCM/MeOH, 2/1/1/0.1, v/v/v/v), affording the desired compound **16aa**.

To a solution of **12aa** (39.5 mg, 0.1 mmol, 1.0 equiv) in DCM (1.0 mL) was added naphthalen-1-ol (15.8 mg, 0.11 mmol, 1.1 equiv), TFA (23.0  $\mu$ L, 0.3 mmol, 3 equiv) was then added. The reaction mixture was stirred at room temperature for 5 hour, the crude compound was purified by column chromatography on silica gel (Pet/EtOAc/DCM/MeOH, 3/1/1/0.1, v/v/v/v), affording the desired compound **17aa**.

**Dimethyl 2-(2-(4-methoxy-4-oxobutanamido)-2-(3-methyl-1*H*-indol-2-yl)ethyl)malonate (16aa)**

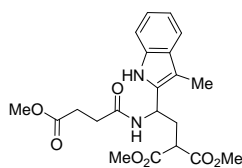

Colorless oil: 30.1 mg, 72% yield,  $R_f = 0.50$  (Pet/EtOAc/DCM/MeOH, 3/1/1/0.1, v/v/v/v); reaction time: 2 h; reaction temperature: 25 °C.

**$^1\text{H NMR}$**  (600 MHz,  $\text{CDCl}_3$ )  $\delta$  9.00 (s, 1H), 7.49 (d,  $J = 7.8$  Hz, 1H), 7.25 (d,  $J = 9.0$  Hz, 1H), 7.15 - 7.12 (m, 1H), 7.08 - 7.06 (m, 1H), 6.76 (d,  $J = 7.8$  Hz, 1H), 5.18 (q,  $J = 7.8$  Hz, 1H), 3.73 (s, 3H), 3.64 (s, 3H), 3.59 (s, 3H), 3.39 (t,  $J = 7.2$  Hz, 1H), 2.66 - 2.57 (m, 4H), 2.44 (t,  $J = 6.6$  Hz, 1H), 2.27 (s, 3H).

**$^{13}\text{C NMR}$**  (150 MHz,  $\text{CDCl}_3$ )  $\delta$  173.9, 171.9, 169.9, 169.7, 135.7, 132.7, 131.9, 128.9, 122.1, 119.2, 118.8, 111.1, 108.5, 53.0, 52.9, 52.0, 49.0, 45.7, 33.4, 31.1, 29.4, 8.7.

**HRMS** (ESI): exact mass calcd for  $\text{C}_{21}\text{H}_{26}\text{N}_2\text{NaO}_7^+$  ( $\text{M}+\text{Na}$ ) $^+$  requires  $m/z$  441.1632, found  $m/z$  441.1632 ( $\Delta = 0$  ppm).

**IR (neat)**: 3361, 2954, 1730, 1644, 1534, 1436, 1334, 1236, 1160, 1007, 907, 726, 647  $\text{cm}^{-1}$ .

**Dimethyl 2-(2-(1-hydroxynaphthalen-2-yl)-2-(4-methoxy-4-oxobutanamido)ethyl)malonate (17aa)**

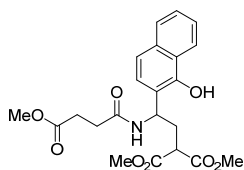

Colorless oil: 27.2 mg, 63% yield,  $R_f = 0.50$  (Pet/EtOAc/DCM/MeOH, 3/1/1/0.1, v/v/v/v); reaction time: 5 h; reaction temperature: 25 °C.

**$^1\text{H NMR}$**  (600 MHz,  $\text{CDCl}_3$ )  $\delta$  9.51 (s, 1H), 8.35 - 8.33 (m, 1H), 7.74 - 7.72 (m, 1H), 7.47 - 7.44 (m, 2H), 7.38 (d,  $J = 8.4$  Hz, 1H), 7.25 (d,  $J = 1.8$  Hz, 1H), 6.63 (d,  $J = 7.8$  Hz, 1H), 5.28 - 5.25 (m, 1H), 3.77 (s, 3H), 3.71 (s, 3H), 3.59 (s, 3H), 3.48 (dd,  $J = 8.4, 6.0$  Hz, 1H), 2.81 - 2.75 (m, 1H), 2.69 - 2.64 (m, 1H), 2.57 - 2.54 (m, 1H), 2.52 - 2.46 (m, 1H).

**$^{13}\text{C NMR}$**  (150 MHz,  $\text{CDCl}_3$ )  $\delta$  173.8, 173.2, 170.1, 169.5, 154.4, 134.3, 127.3, 126.8, 126.7, 125.6, 123.5, 122.7, 120.5, 120.7, 53.2, 53.1, 52.0, 49.6, 46.8, 31.9, 30.8, 29.2.

**HRMS** (ESI): exact mass calcd for  $\text{C}_{22}\text{H}_{25}\text{NNaO}_8^+$  ( $\text{M}+\text{Na}$ ) $^+$  requires  $m/z$  454.1472, found  $m/z$  454.1468 ( $\Delta = -4$  ppm).

**IR (neat)**: 3355, 2954, 1730, 1638, 1574, 1534, 1436, 1363, 1233, 1162, 908, 811, 727, 647  $\text{cm}^{-1}$ .

# NMR Spectra

## <sup>1</sup>H NMR Spectrum of L6 (600 MHz, CDCl<sub>3</sub>)

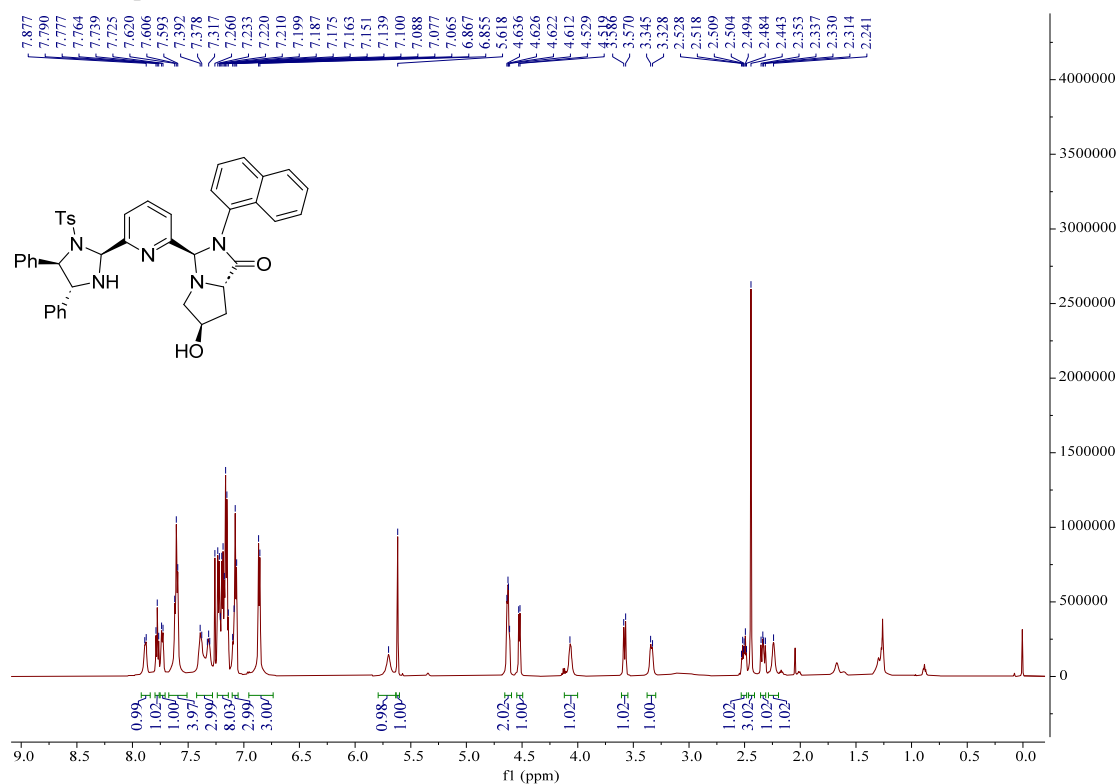

## <sup>13</sup>C NMR Spectrum of L6 (150 MHz, CDCl<sub>3</sub>)

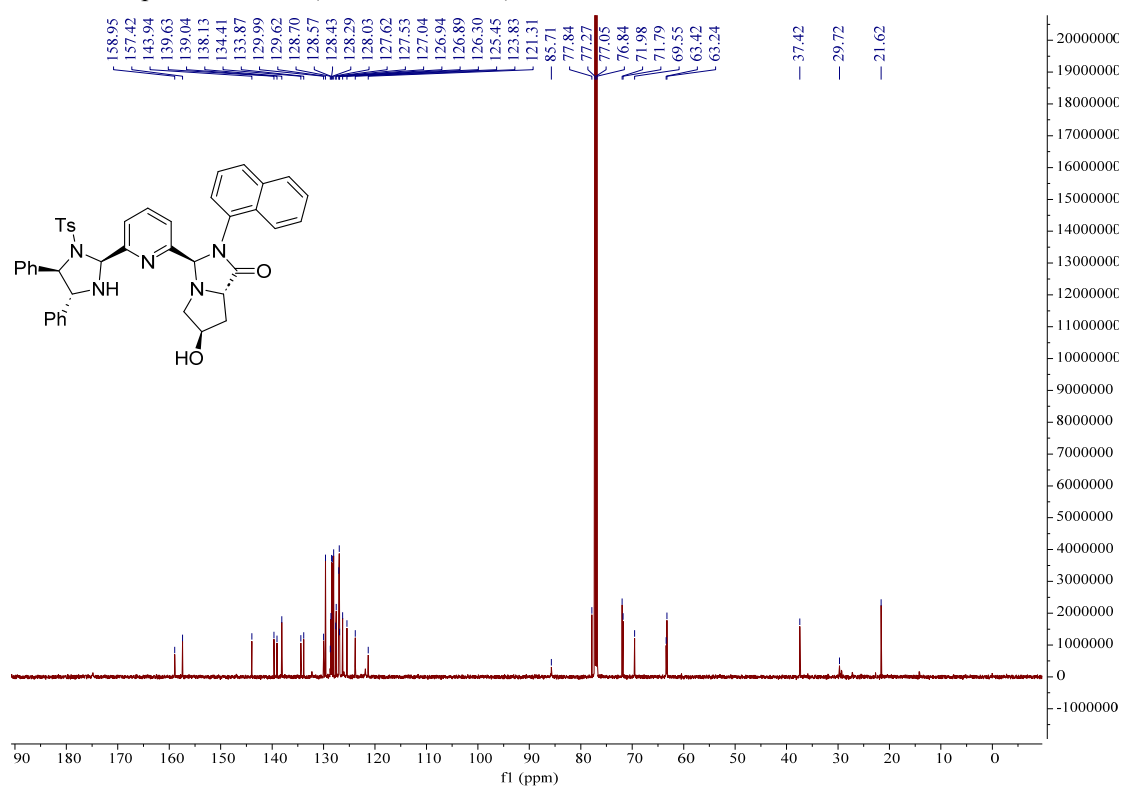

<sup>1</sup>H NMR Spectrum of **3aa** (400 MHz, CDCl<sub>3</sub>)

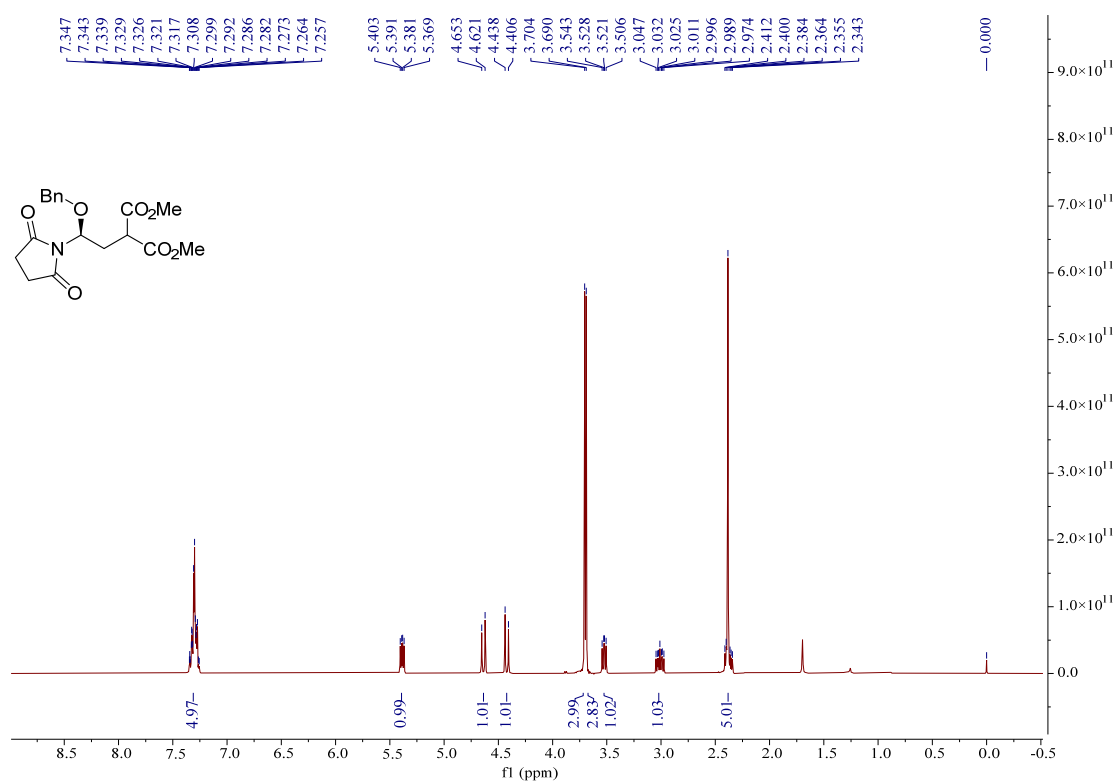

<sup>13</sup>C NMR Spectrum of **3aa** (100 MHz, CDCl<sub>3</sub>)

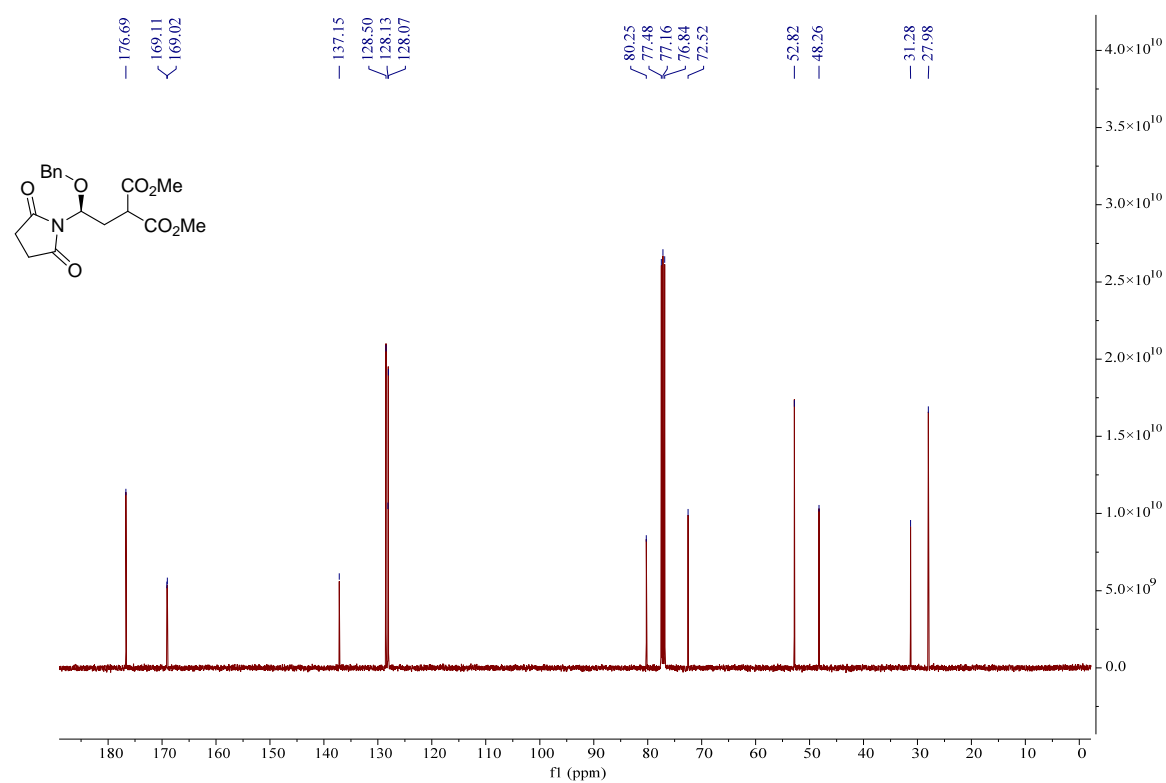

<sup>1</sup>H NMR Spectrum of **3ab** (400 MHz, CDCl<sub>3</sub>)

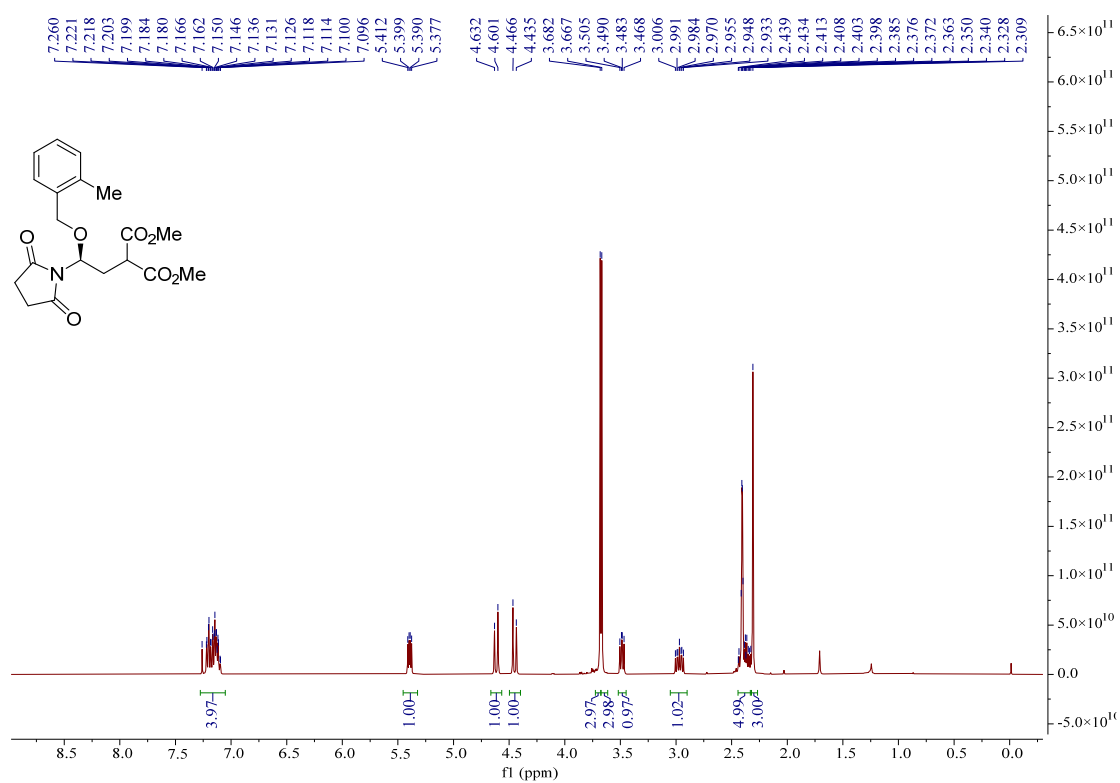

<sup>13</sup>C NMR Spectrum of **3ab** (100 MHz, CDCl<sub>3</sub>)

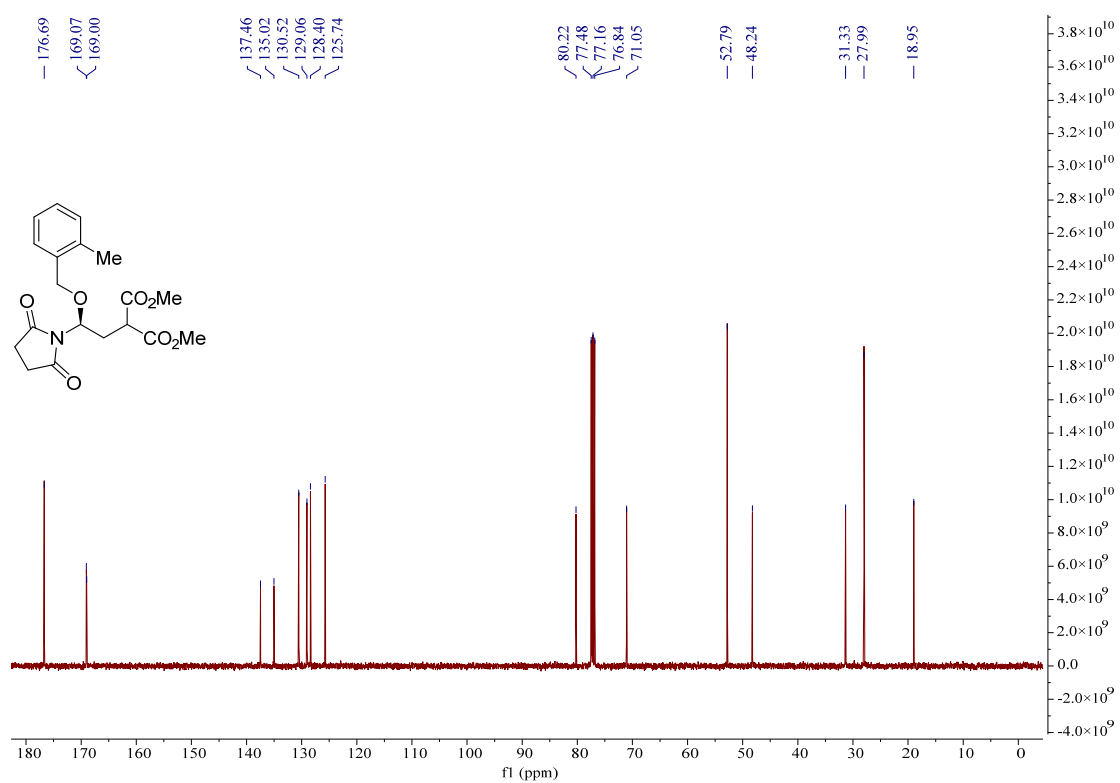



<sup>1</sup>H NMR Spectrum of **3ac** (400 MHz, CDCl<sub>3</sub>)

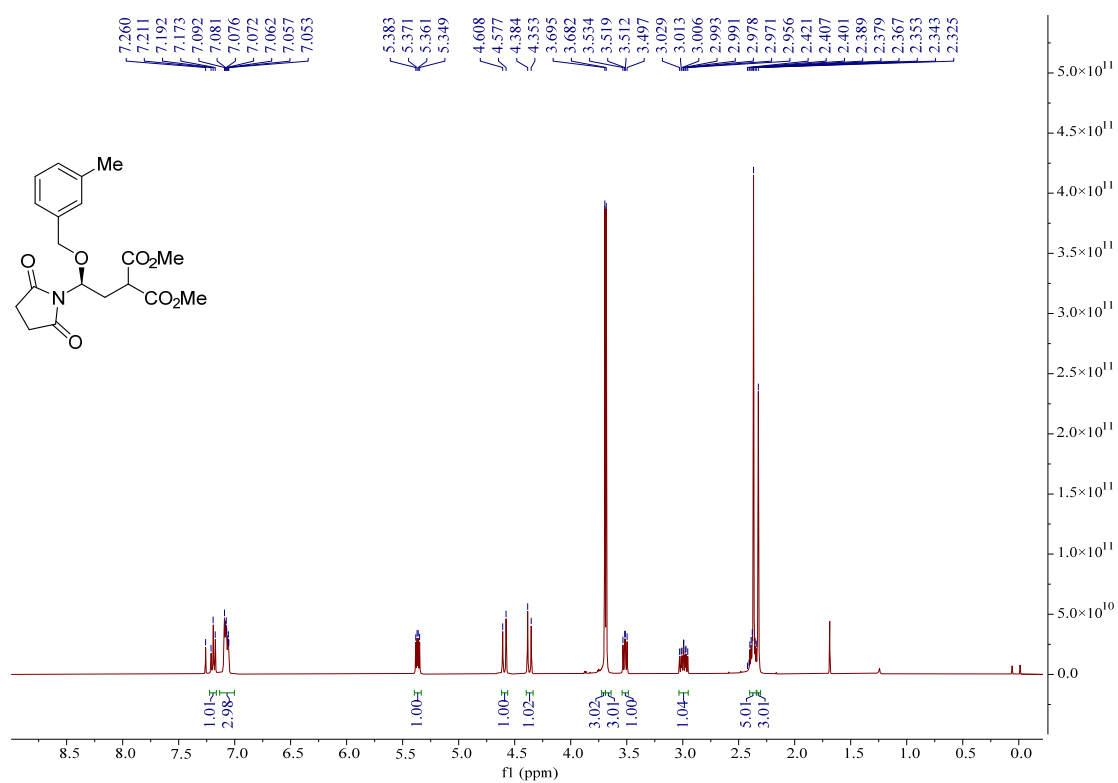

<sup>13</sup>C NMR Spectrum of **3ac** (100 MHz, CDCl<sub>3</sub>)

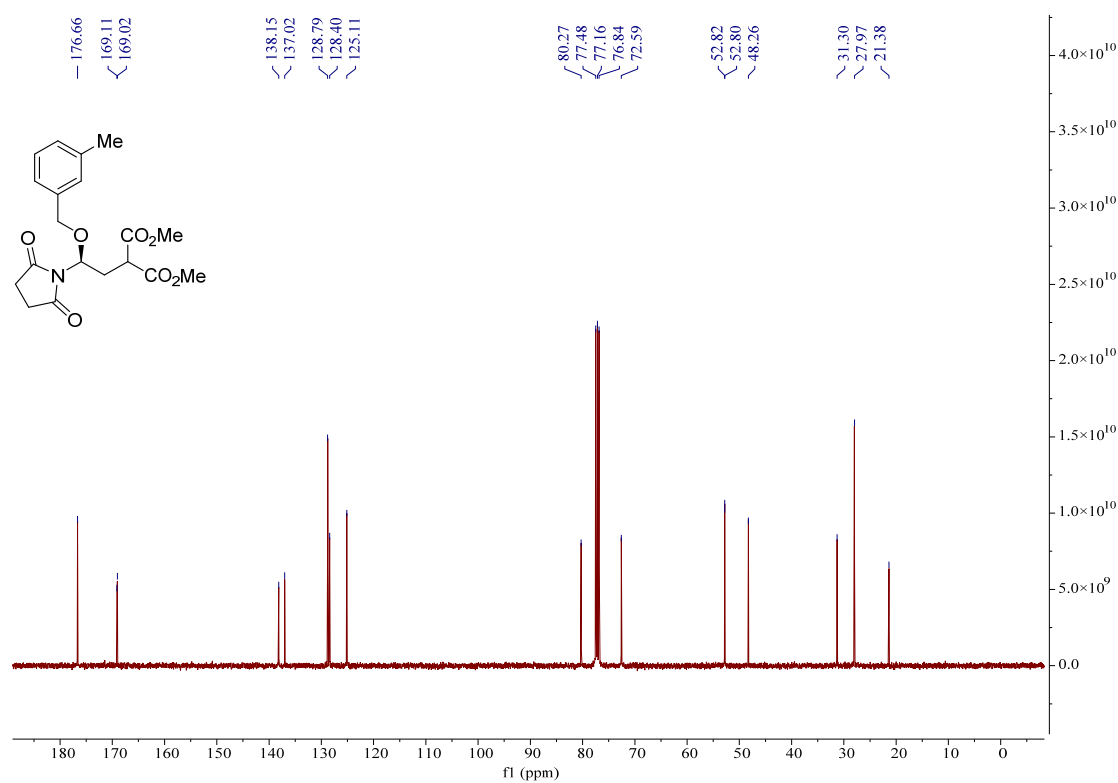

<sup>1</sup>H NMR Spectrum of **3ad** (600 MHz, CDCl<sub>3</sub>)

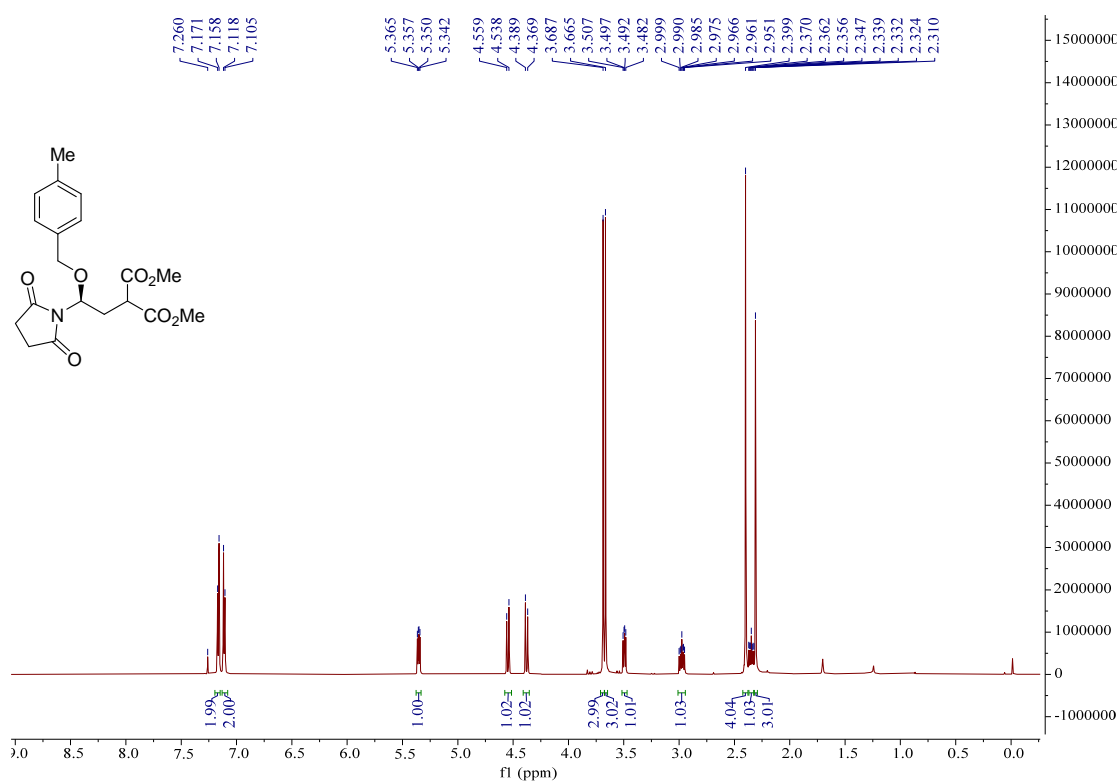

<sup>13</sup>C NMR Spectrum of **3ad** (150 MHz, CDCl<sub>3</sub>)

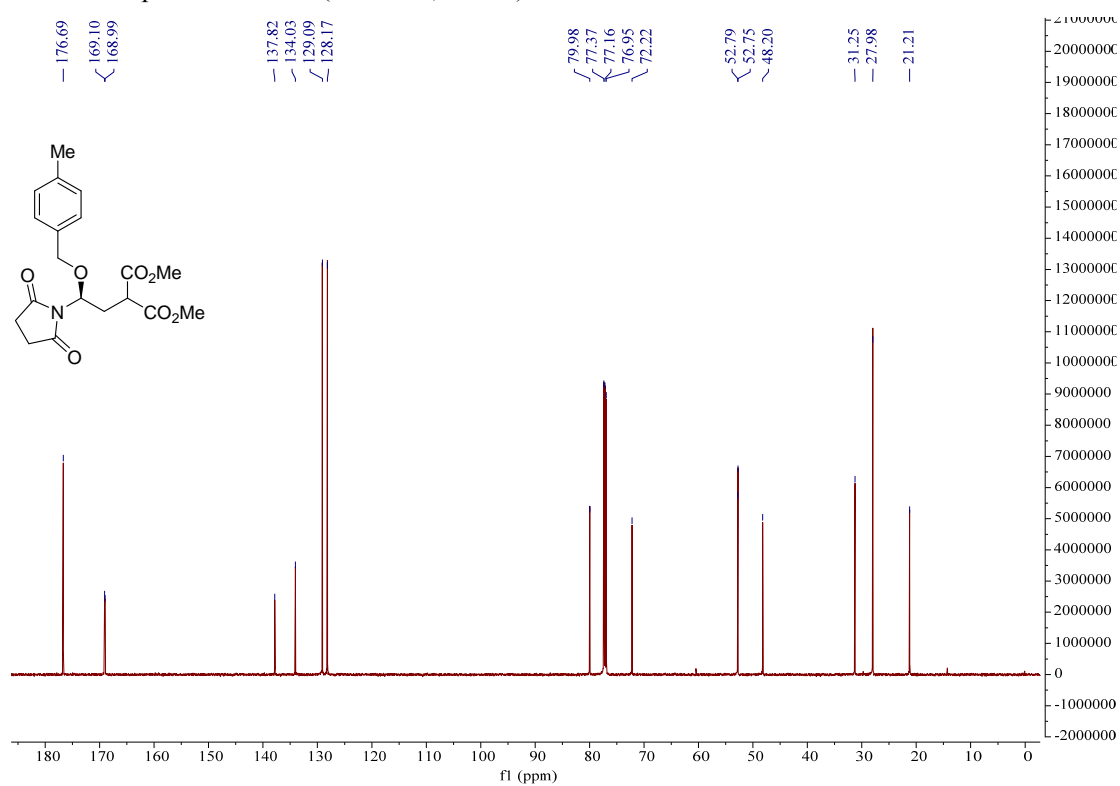

<sup>1</sup>H NMR Spectrum of **3ae** (600 MHz, CDCl<sub>3</sub>)

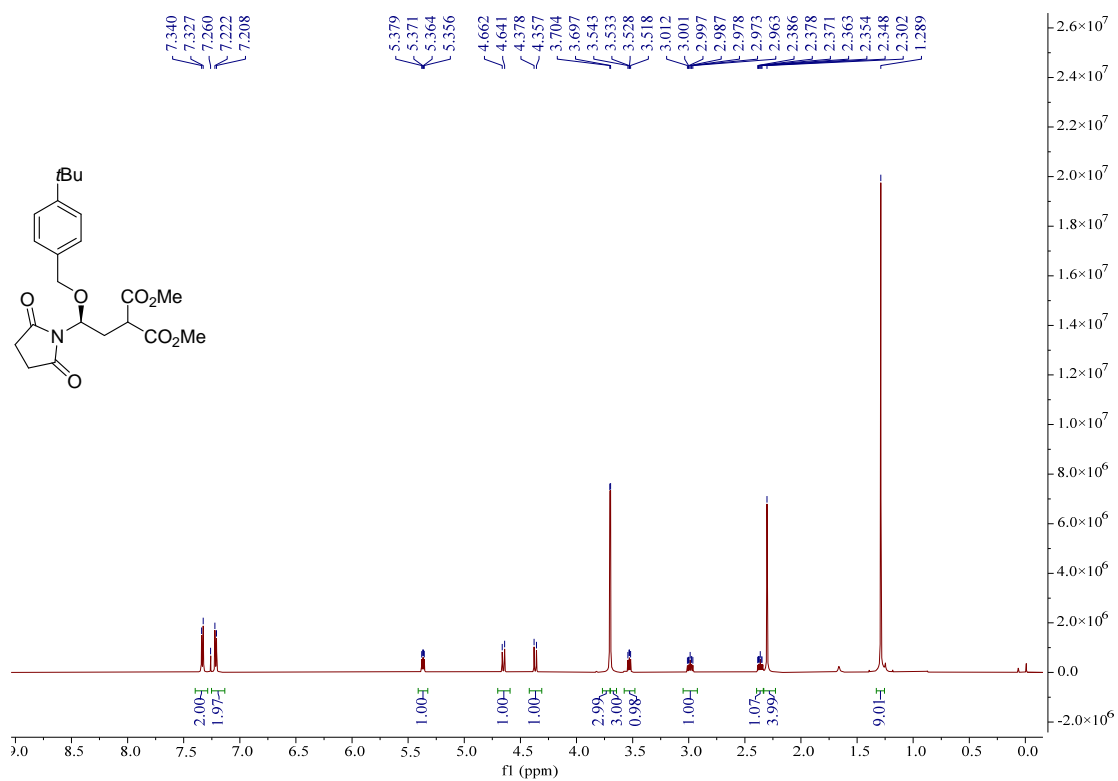

<sup>13</sup>C NMR Spectrum of **3ae** (150 MHz, CDCl<sub>3</sub>)

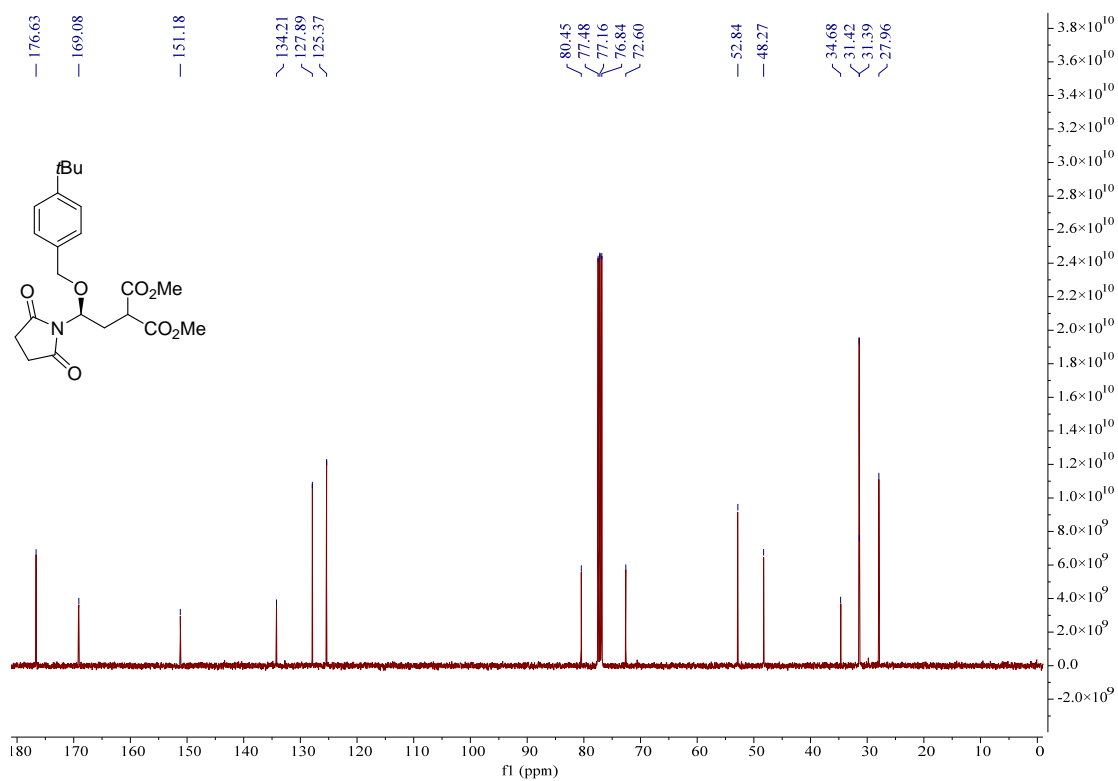

<sup>1</sup>H NMR Spectrum of **3af** (600 MHz, CDCl<sub>3</sub>)

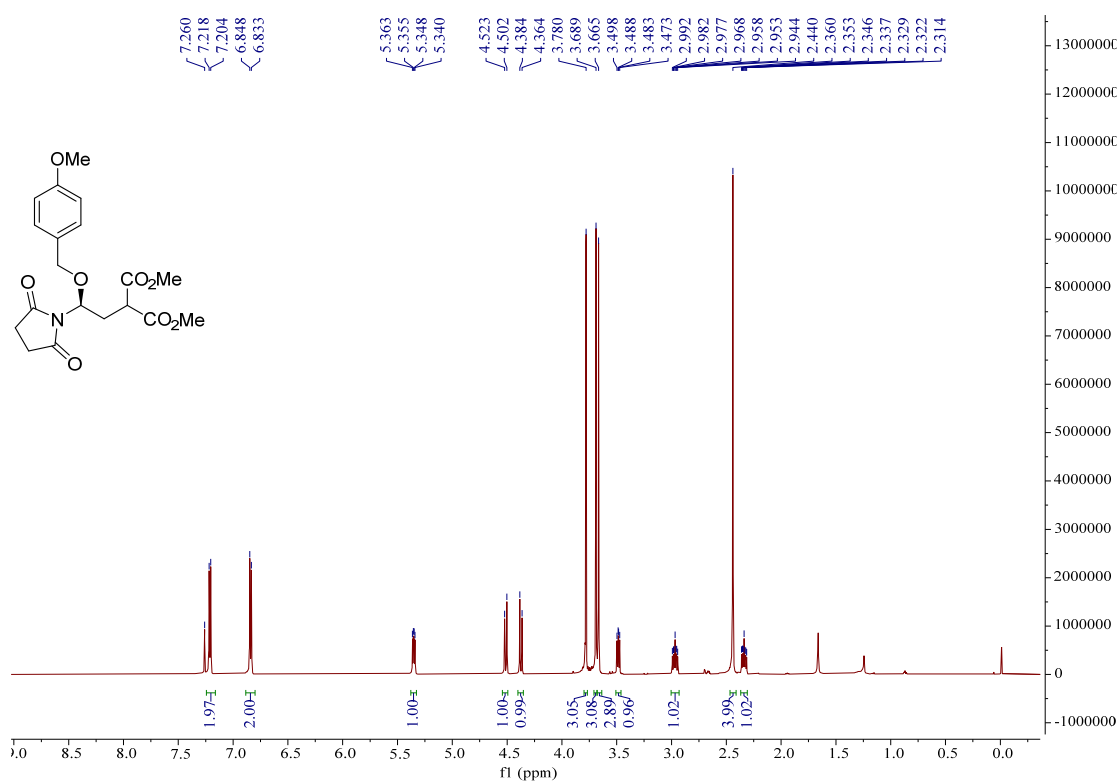

<sup>13</sup>C NMR Spectrum of **3af** (150 MHz, CDCl<sub>3</sub>)

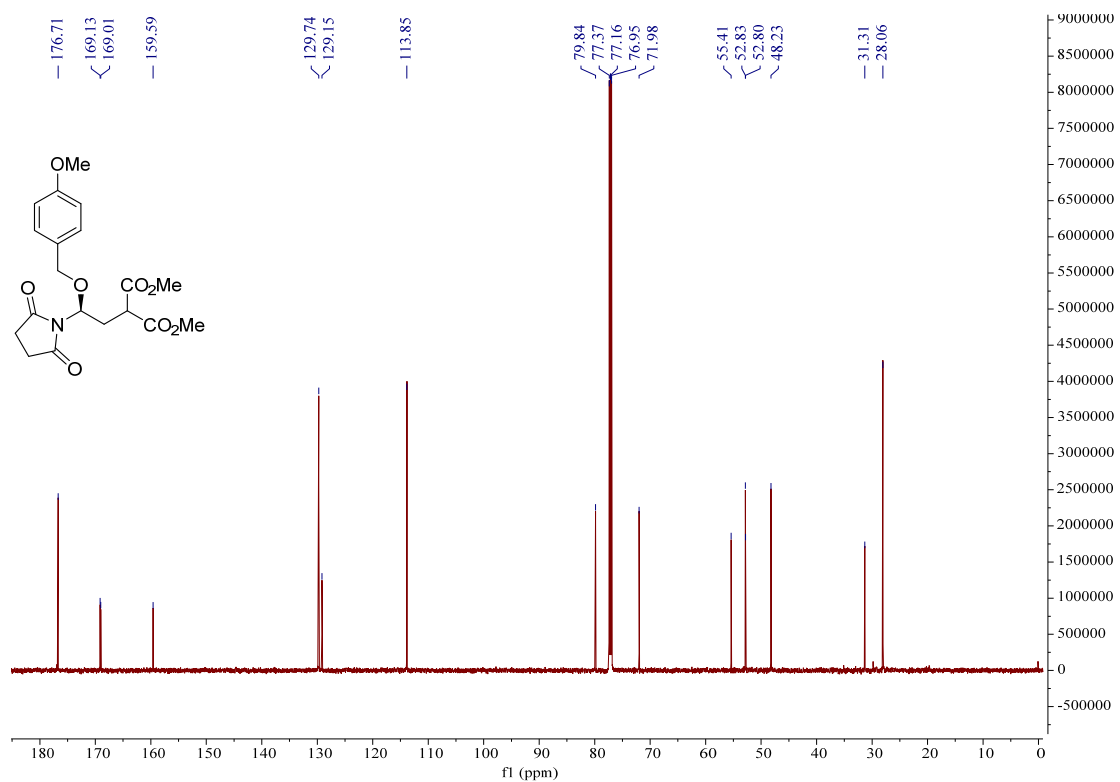

<sup>1</sup>H NMR Spectrum of **3ag** (600 MHz, CDCl<sub>3</sub>)

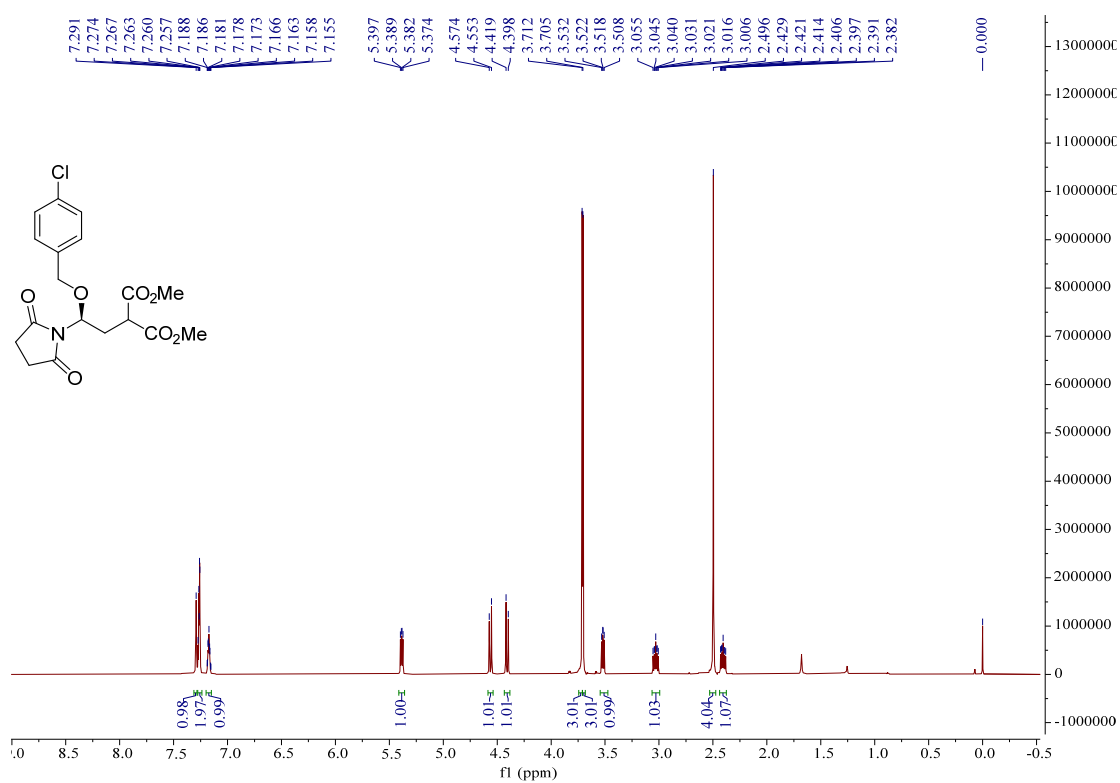

<sup>13</sup>C NMR Spectrum of **3ag** (150 MHz, CDCl<sub>3</sub>)

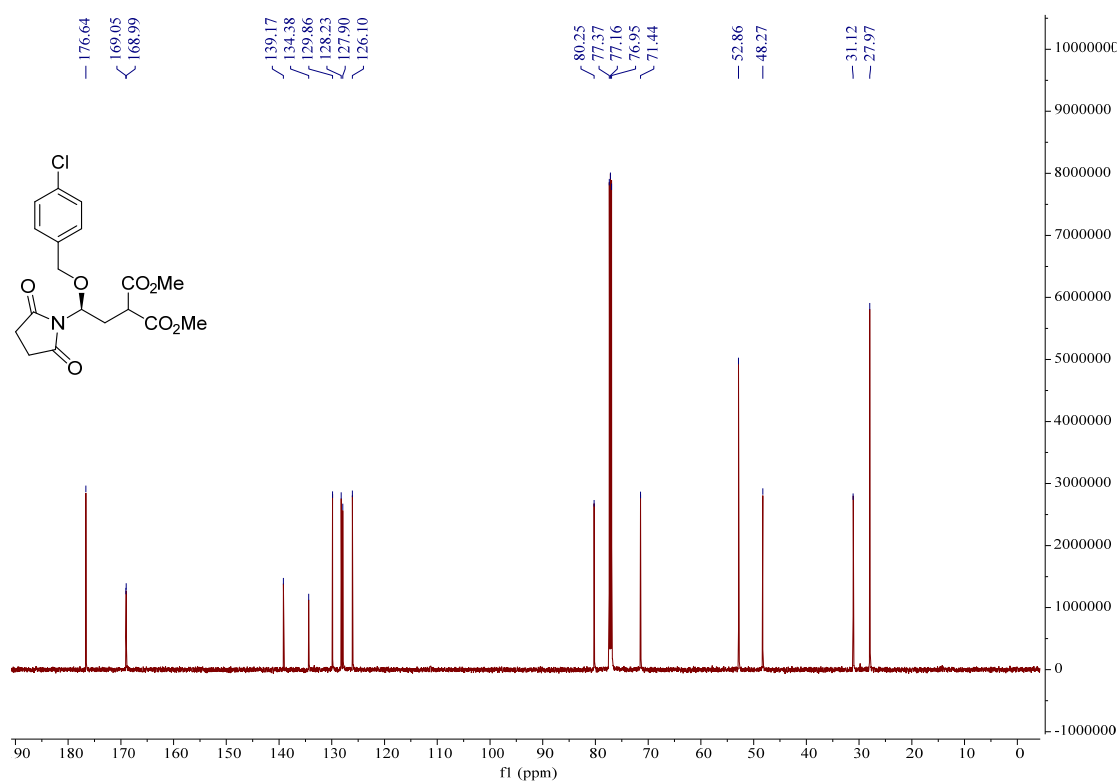

<sup>1</sup>H NMR Spectrum of **3ah** (600 MHz, CDCl<sub>3</sub>)

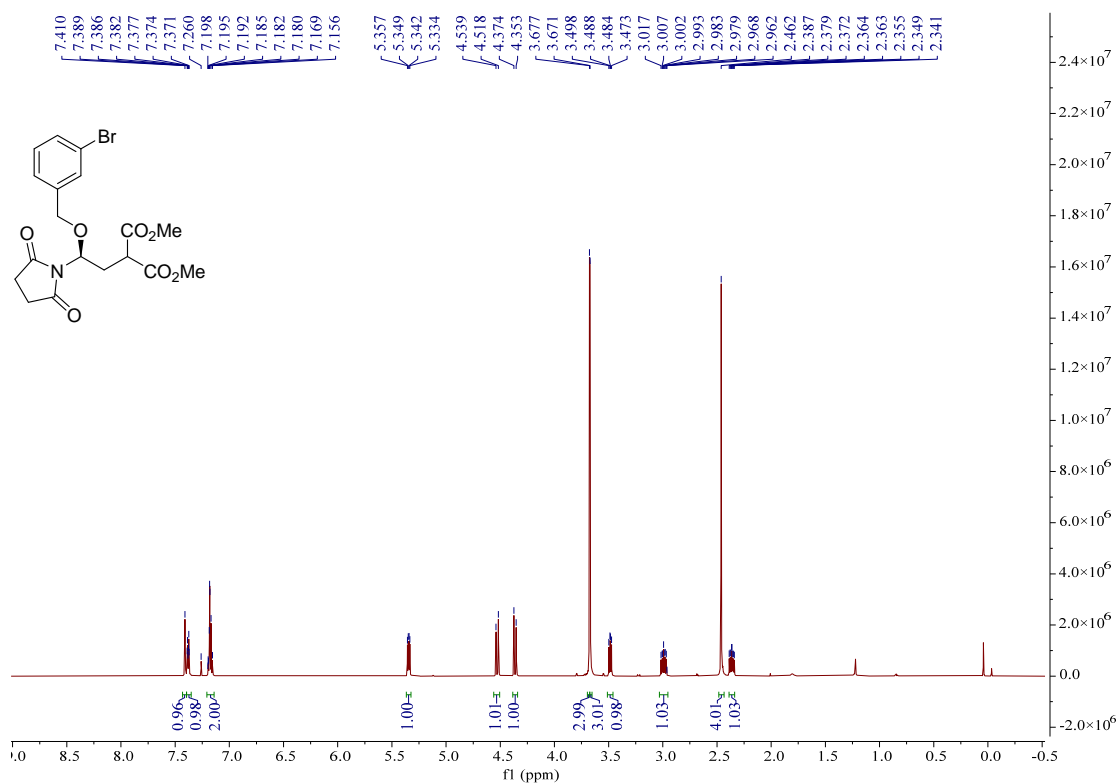

<sup>13</sup>C NMR Spectrum of **3ah** (150 MHz, CDCl<sub>3</sub>)

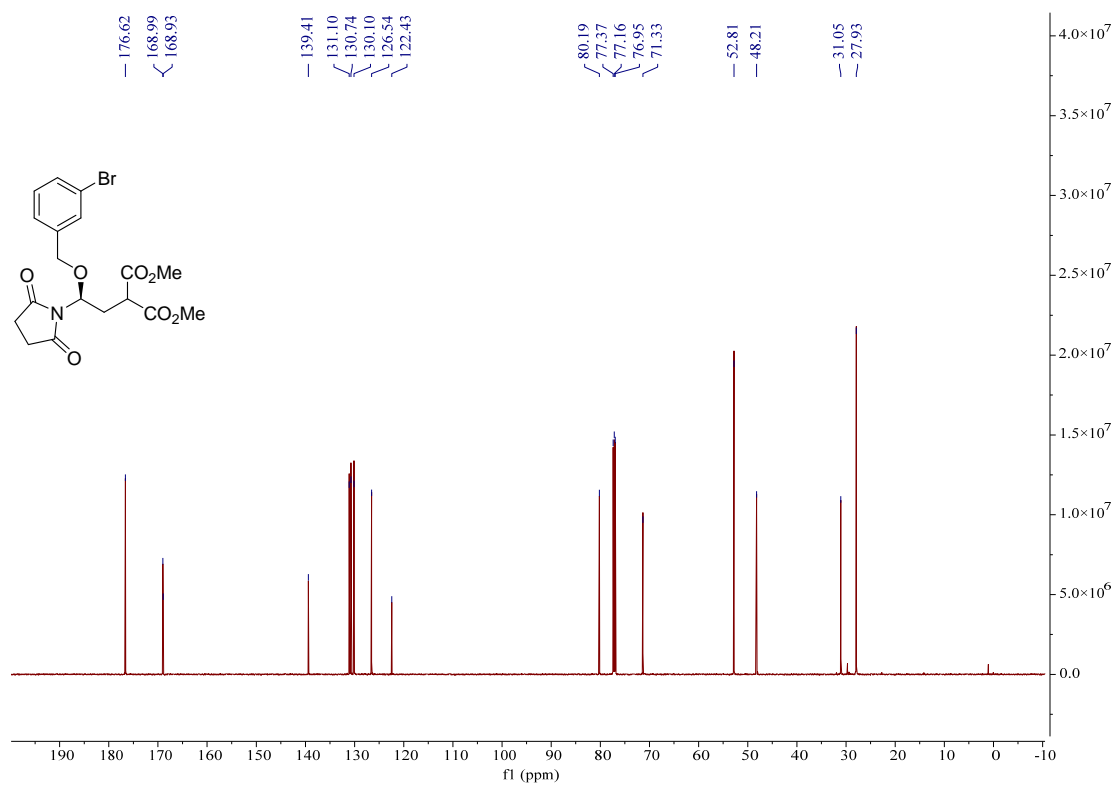

### <sup>1</sup>H NMR Spectrum of **3ai** (600 MHz, CDCl<sub>3</sub>)

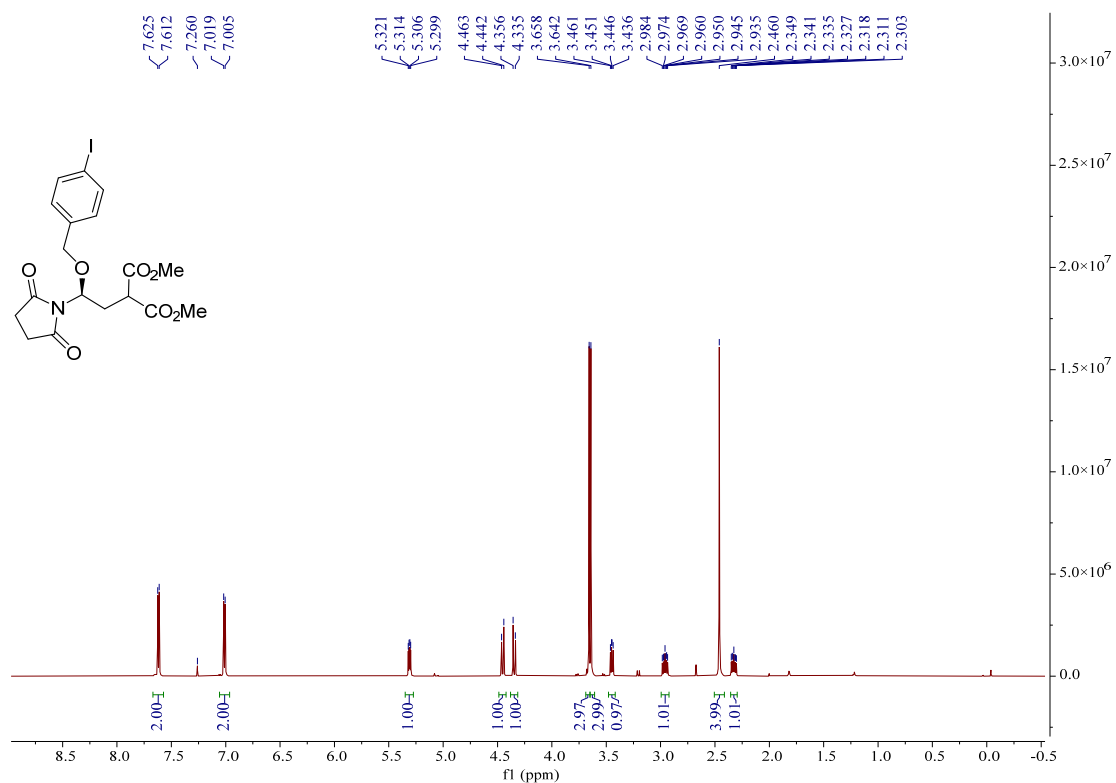

### <sup>13</sup>C NMR Spectrum of **3ai** (150 MHz, CDCl<sub>3</sub>)

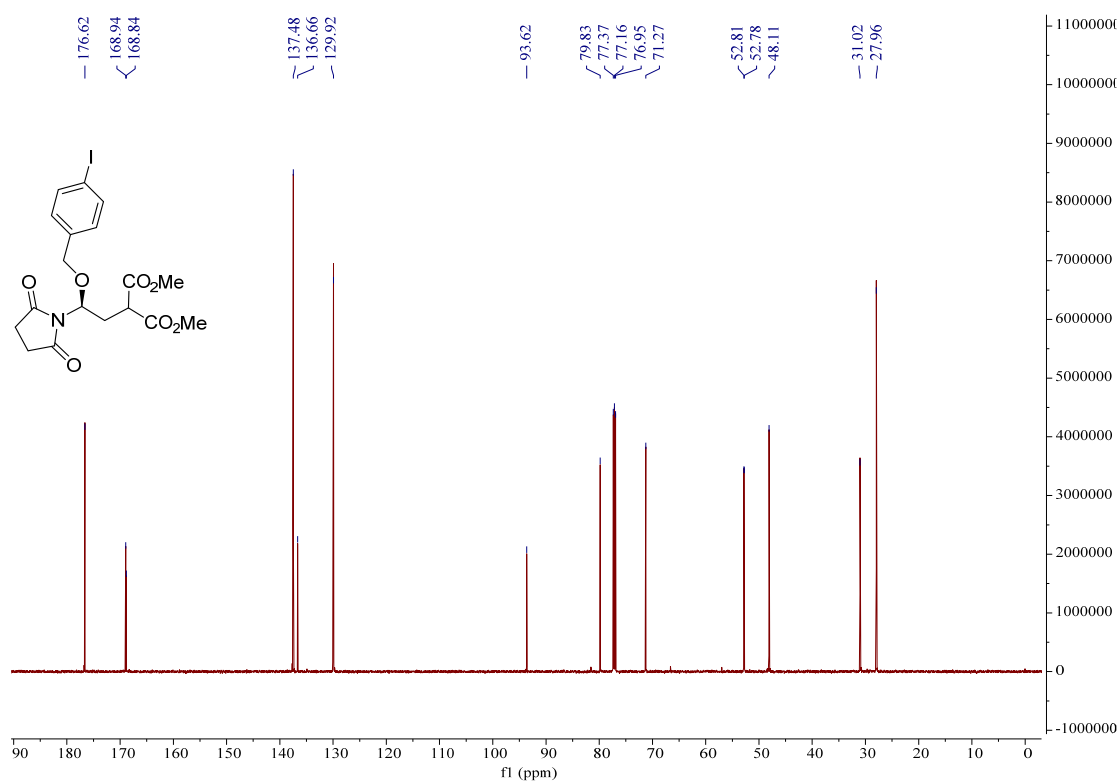

<sup>1</sup>H NMR Spectrum of **3aj** (600 MHz, CDCl<sub>3</sub>)

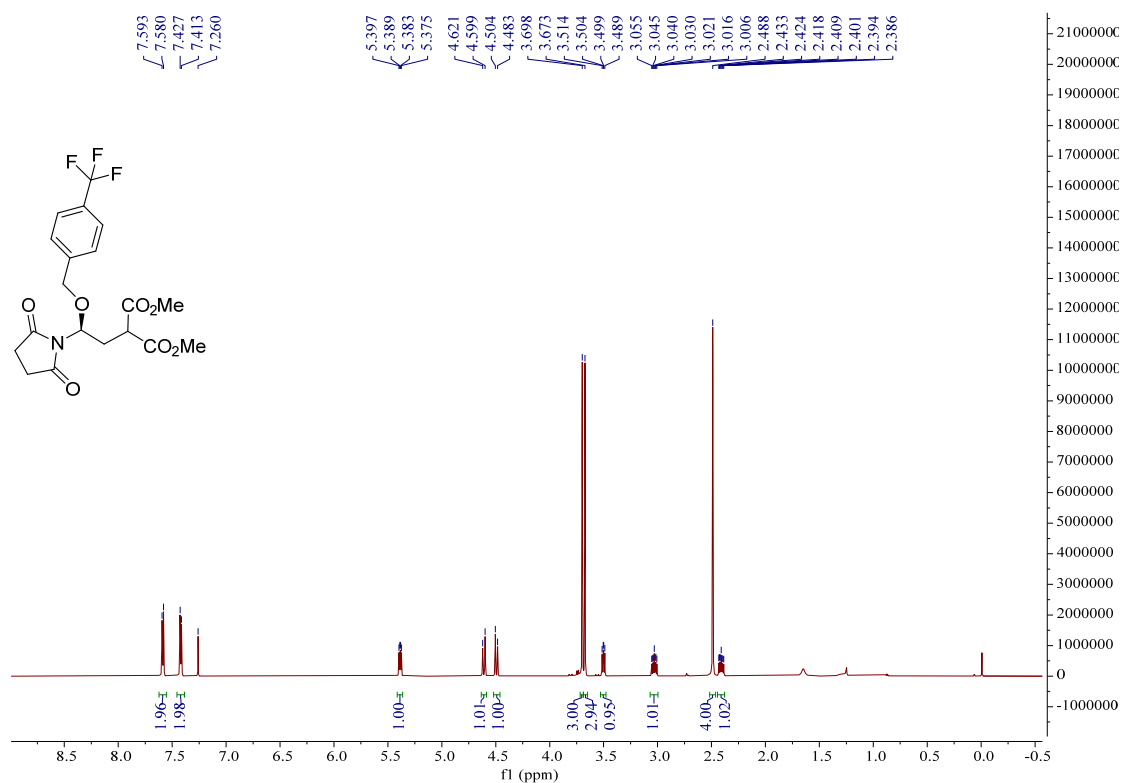

<sup>13</sup>C NMR Spectrum of **3aj** (150 MHz, CDCl<sub>3</sub>)

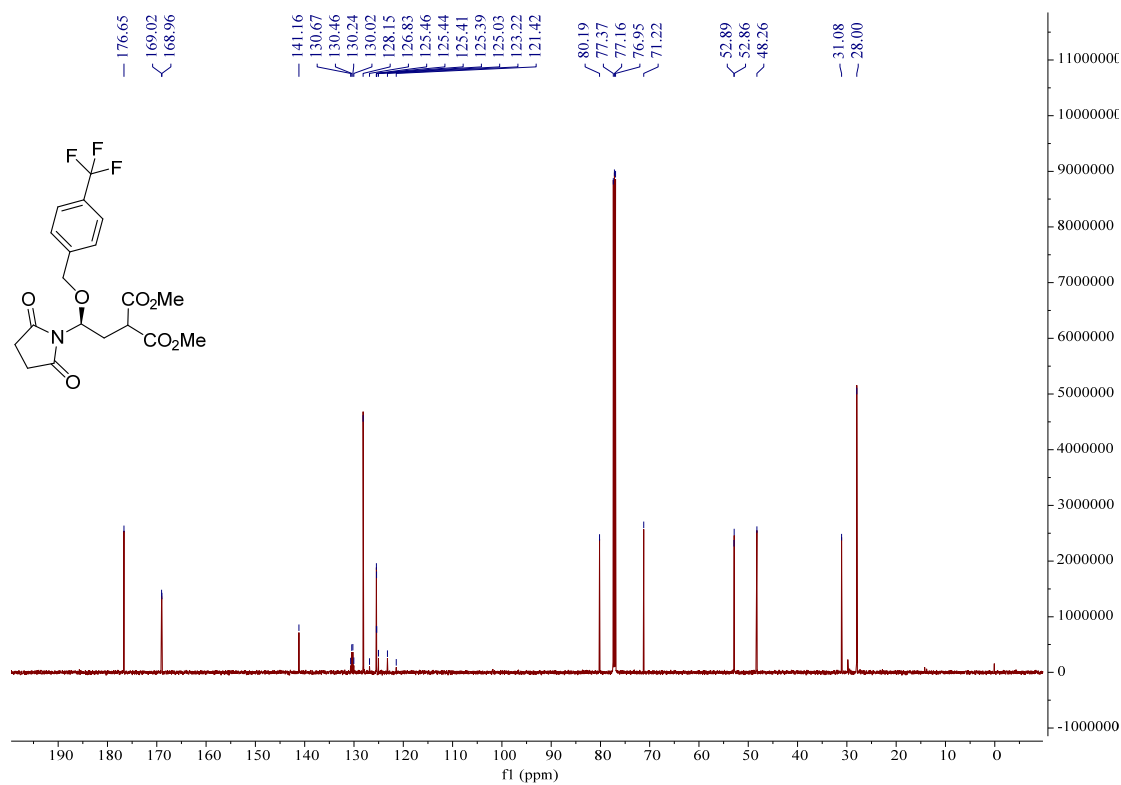



### <sup>1</sup>H NMR Spectrum of **3ak** (400 MHz, CDCl<sub>3</sub>)

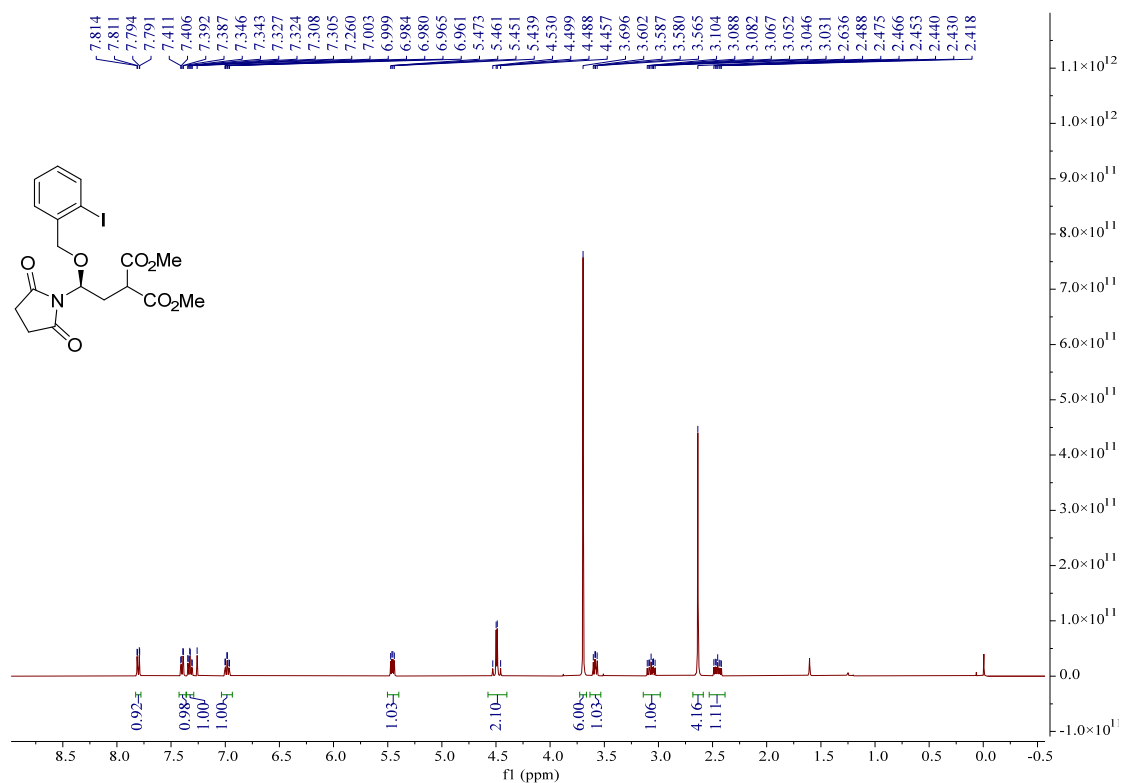

### <sup>13</sup>C NMR Spectrum of **3ak** (100 MHz, CDCl<sub>3</sub>)

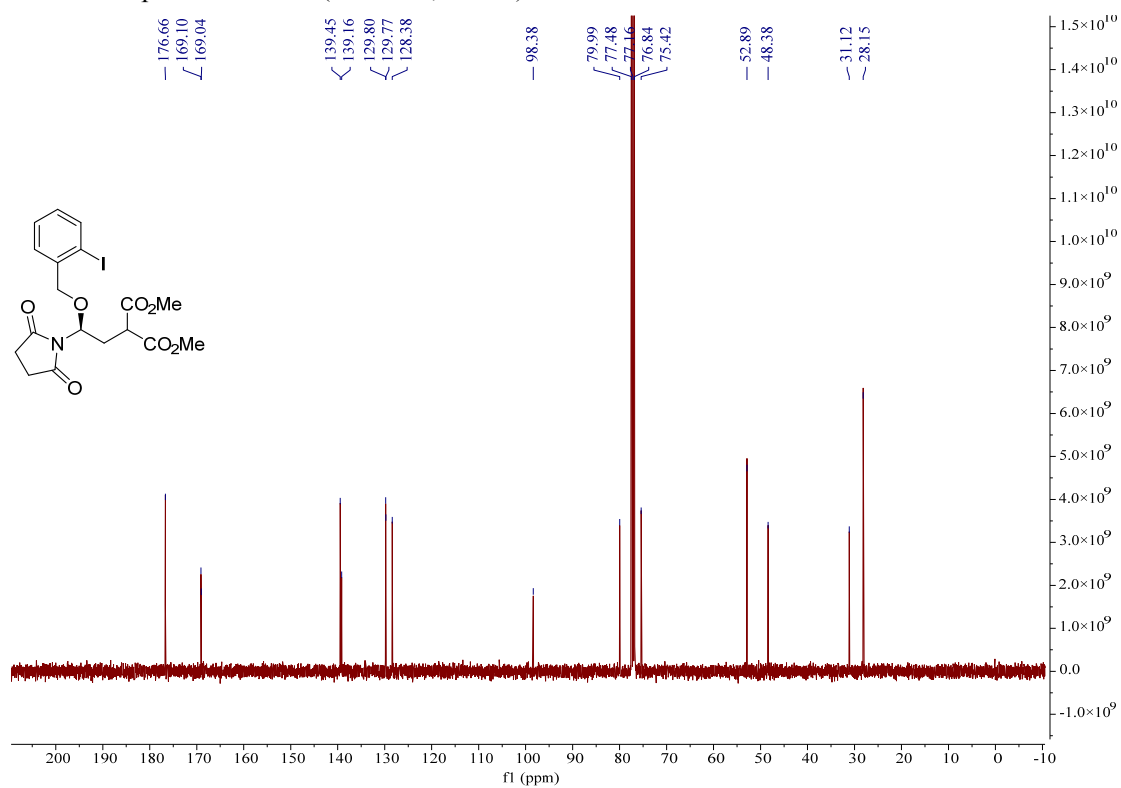

<sup>1</sup>H NMR Spectrum of **3al** (600 MHz, CDCl<sub>3</sub>)

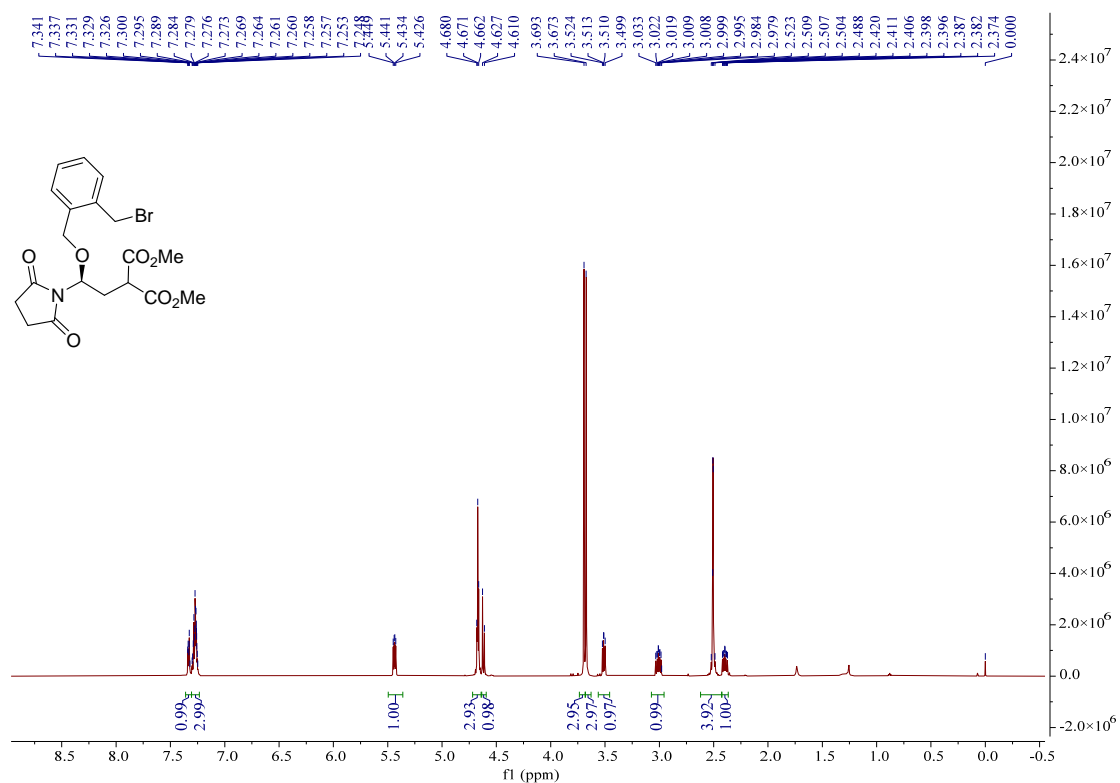

<sup>13</sup>C NMR Spectrum of **3al** (150 MHz, CDCl<sub>3</sub>)

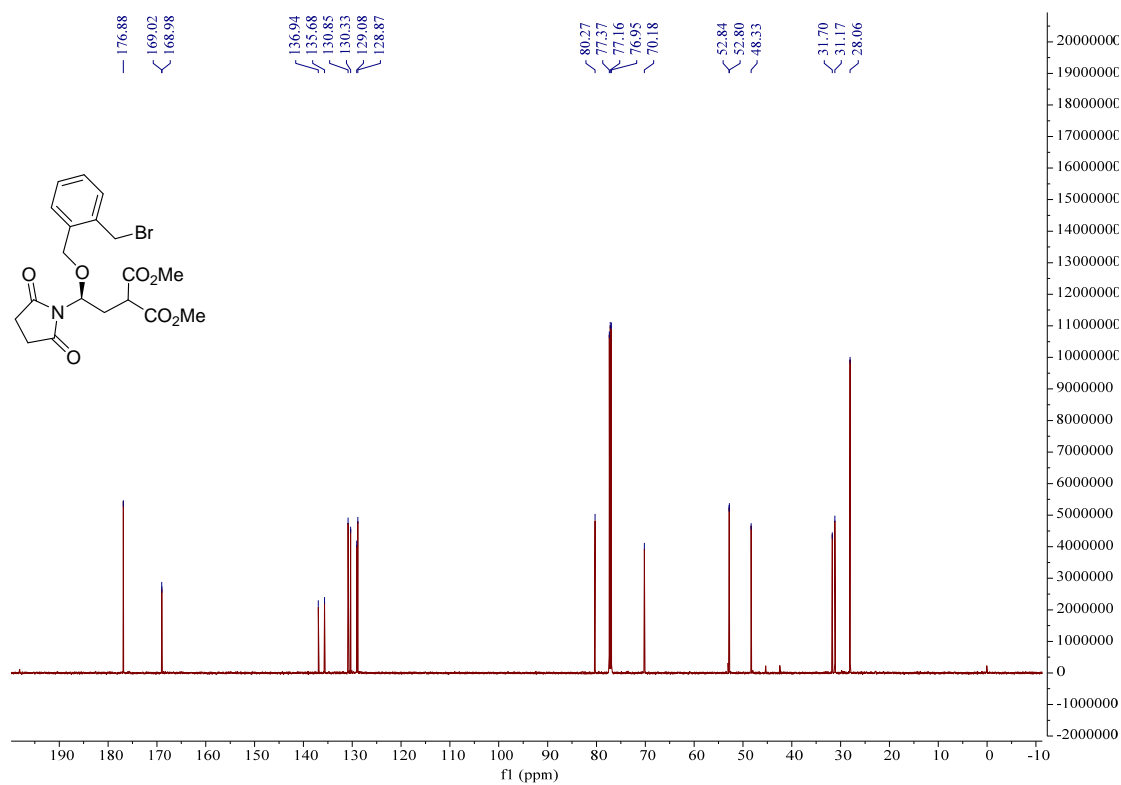

### <sup>1</sup>H NMR Spectrum of **3am** (400 MHz, CDCl<sub>3</sub>)

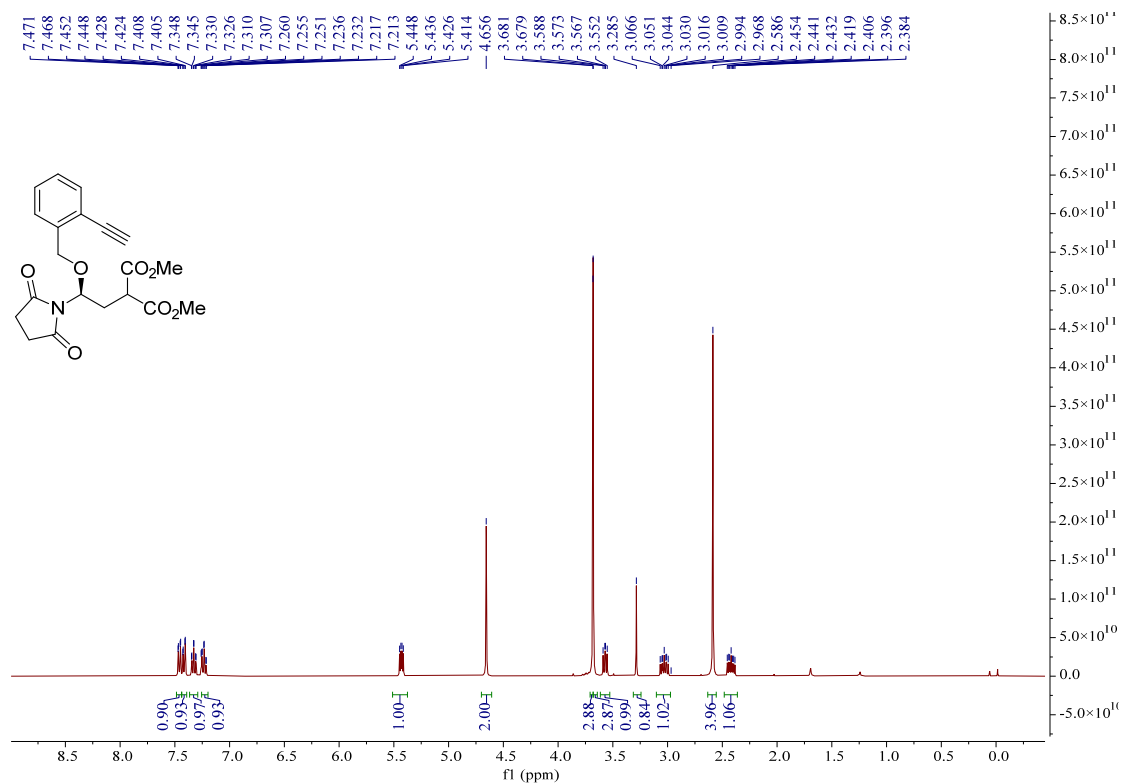

### <sup>13</sup>C NMR Spectrum of **3am** (100 MHz, CDCl<sub>3</sub>)

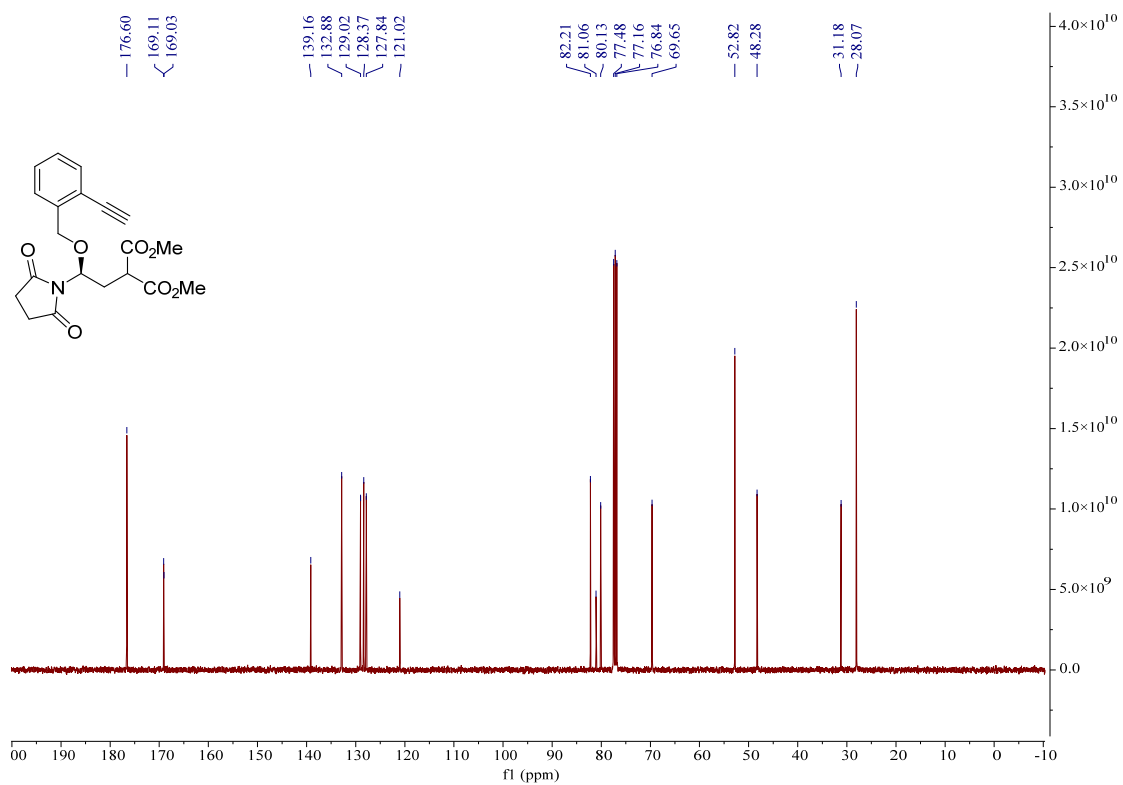

### <sup>1</sup>H NMR Spectrum of **3an** (600 MHz, CDCl<sub>3</sub>)

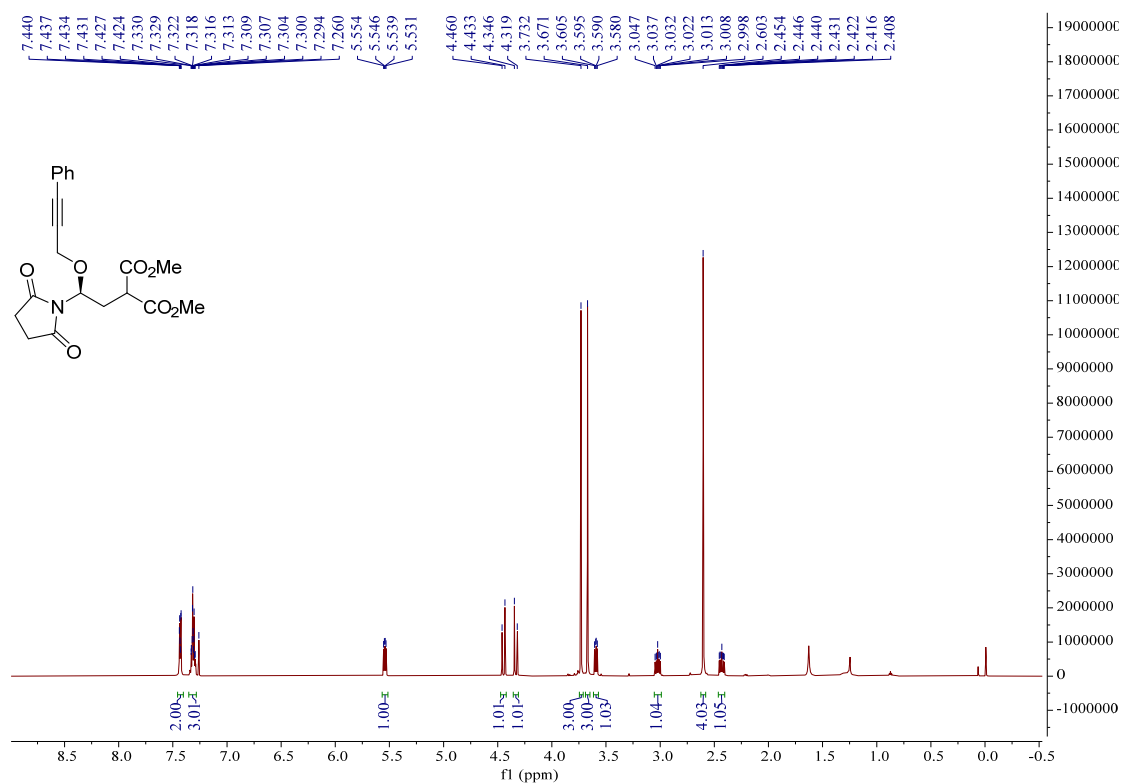

### <sup>13</sup>C NMR Spectrum of **3an** (150 MHz, CDCl<sub>3</sub>)

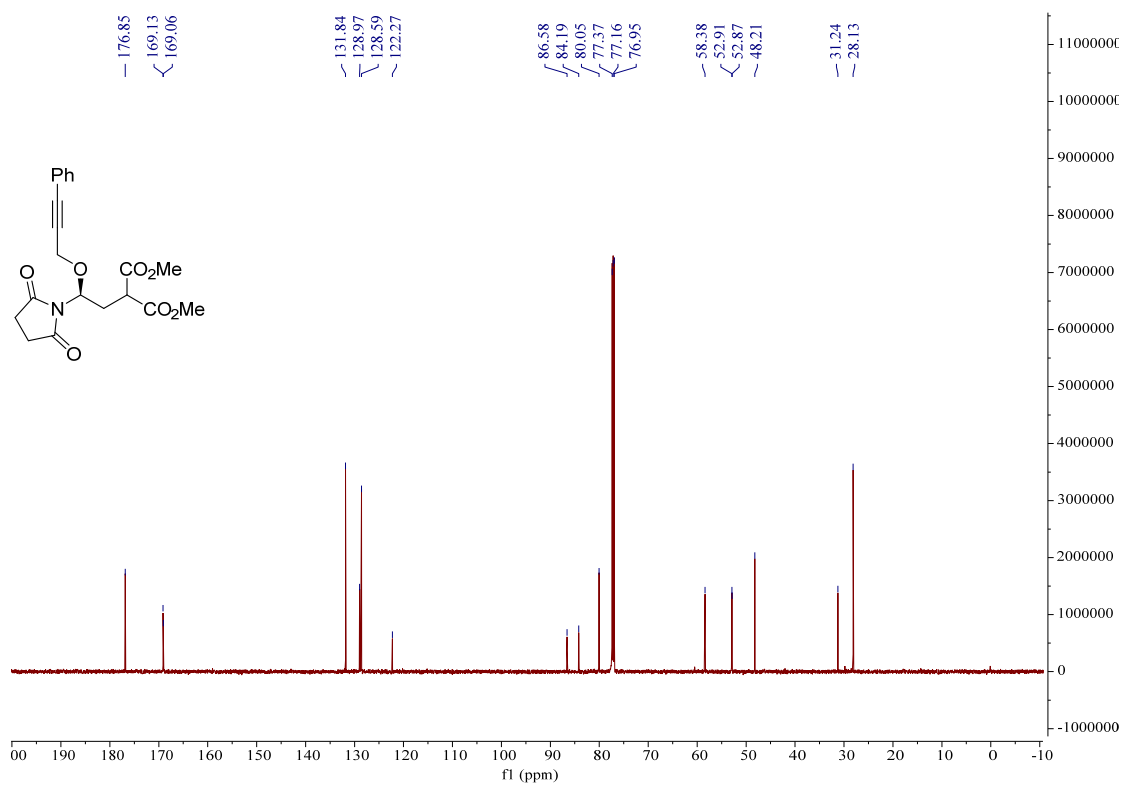

<sup>1</sup>H NMR Spectrum of **3ao** (600 MHz, CDCl<sub>3</sub>)

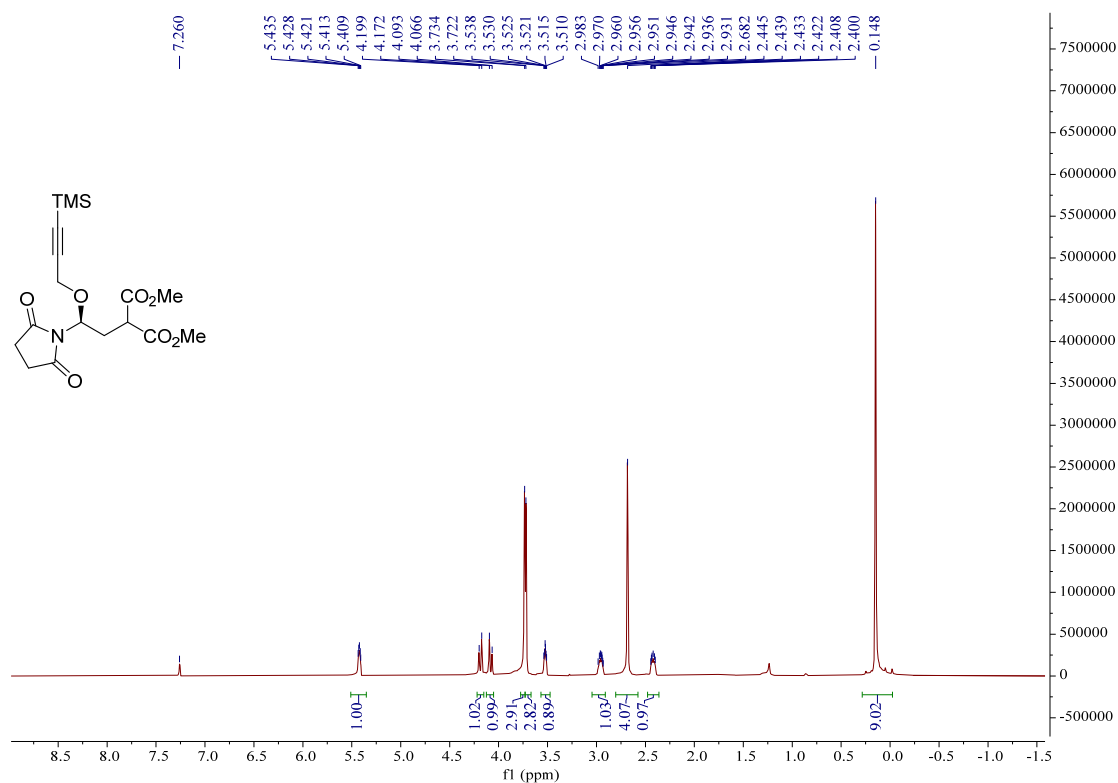

<sup>13</sup>C NMR Spectrum of **3ao** (150 MHz, CDCl<sub>3</sub>)

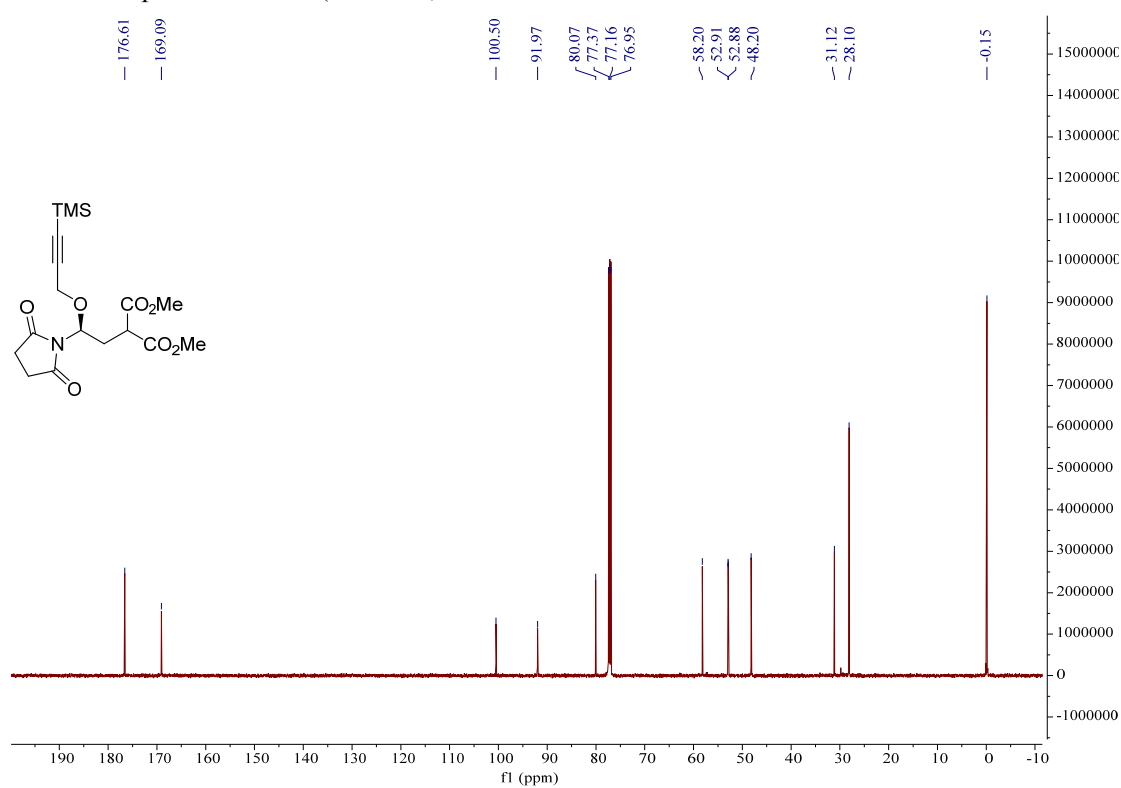

<sup>1</sup>H NMR Spectrum of **3ap** (600 MHz, CDCl<sub>3</sub>)

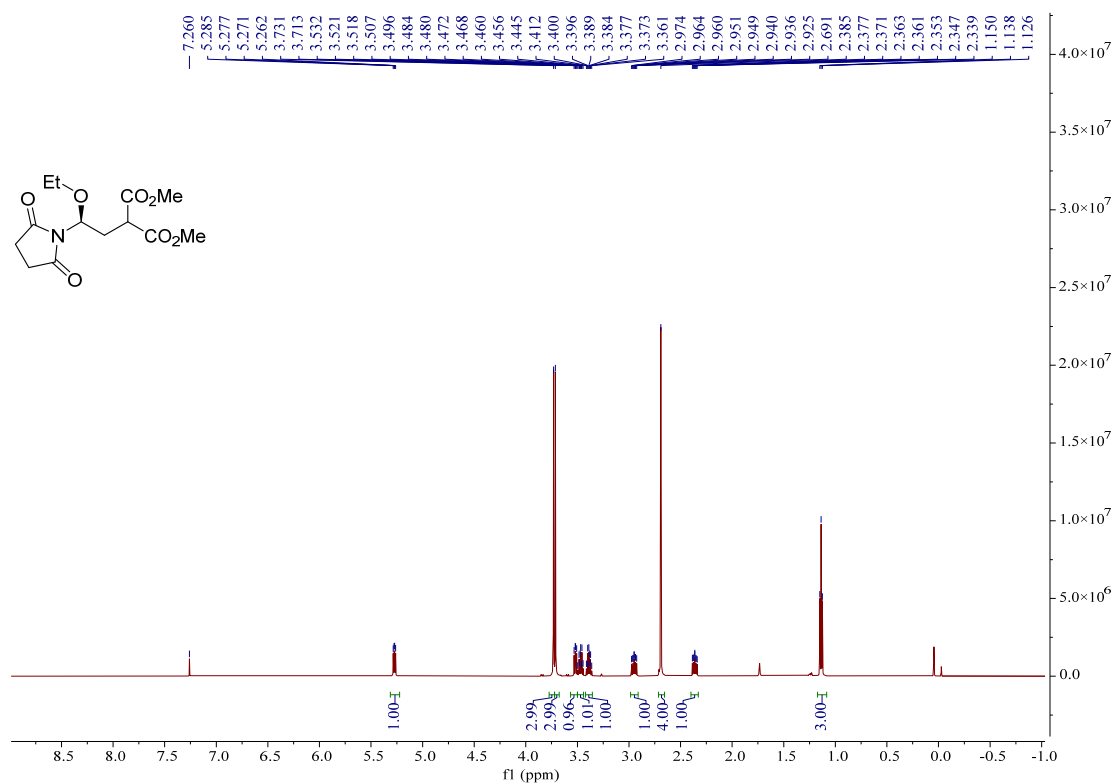

<sup>13</sup>C NMR Spectrum of **3ap** (150 MHz, CDCl<sub>3</sub>)

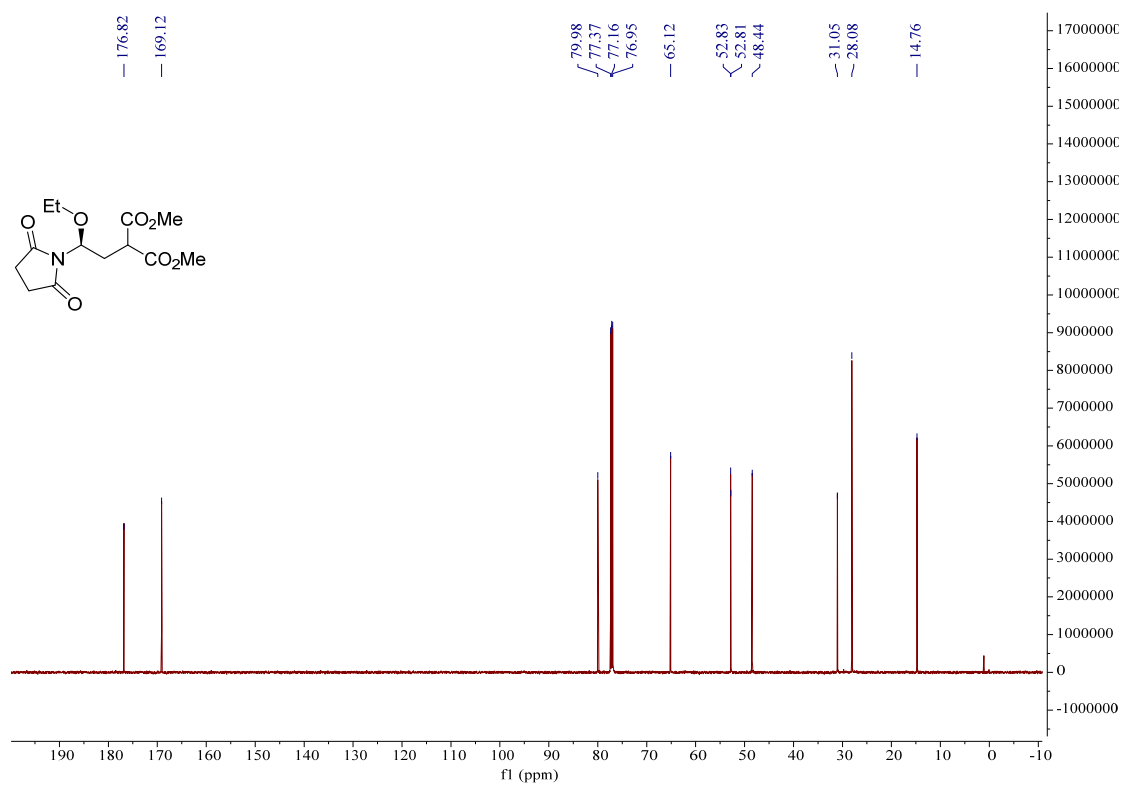

<sup>1</sup>H NMR Spectrum of **3aq** (600 MHz, CDCl<sub>3</sub>)

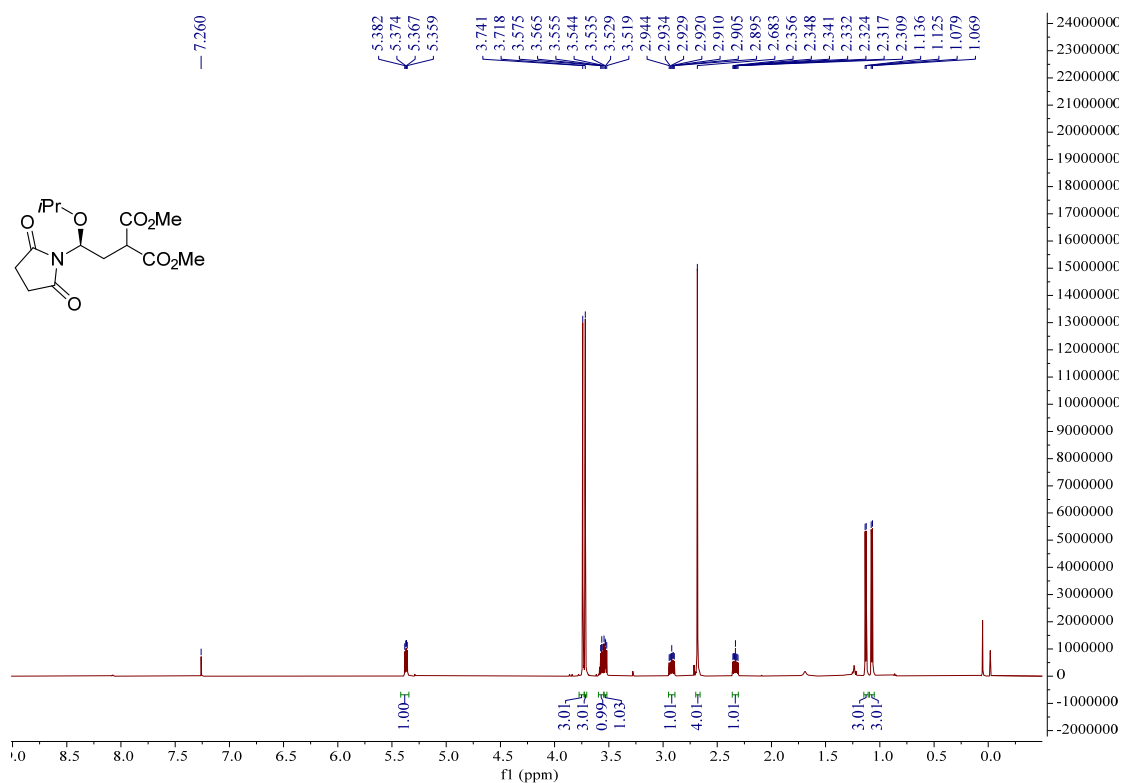

<sup>13</sup>C NMR Spectrum of **3aq** (150 MHz, CDCl<sub>3</sub>)

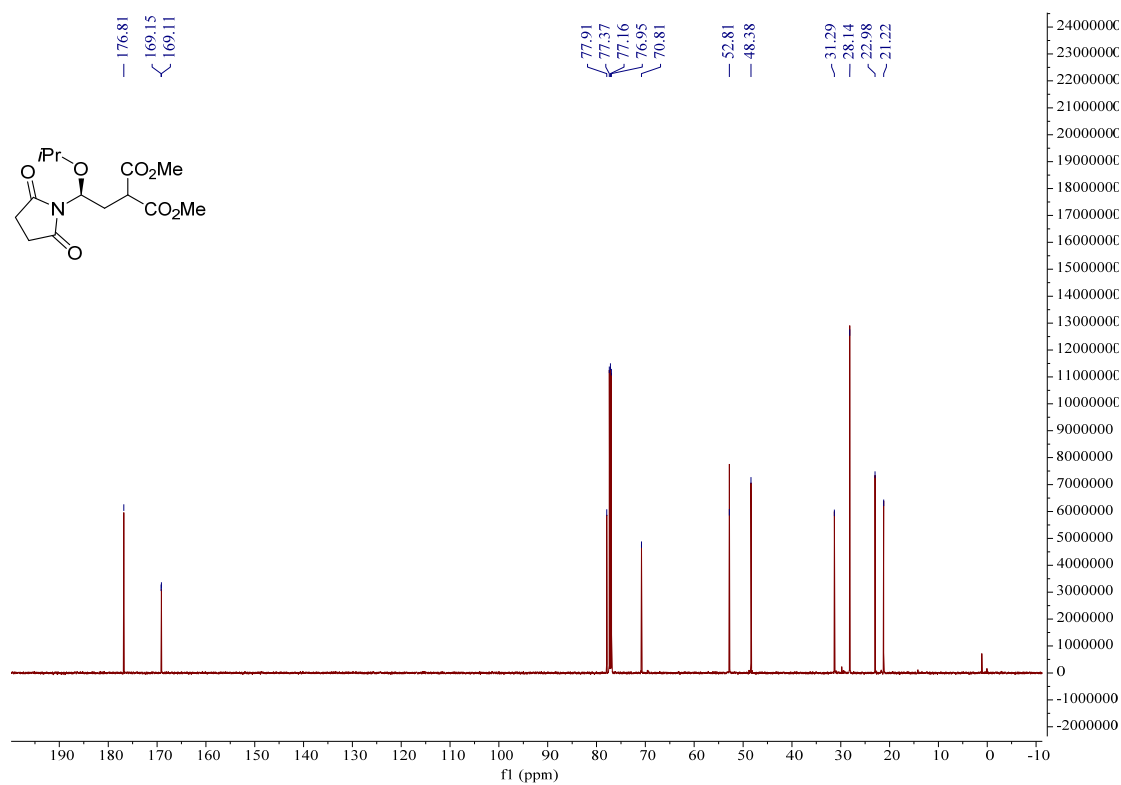

<sup>1</sup>H NMR Spectrum of **3ar** (600 MHz, CDCl<sub>3</sub>)

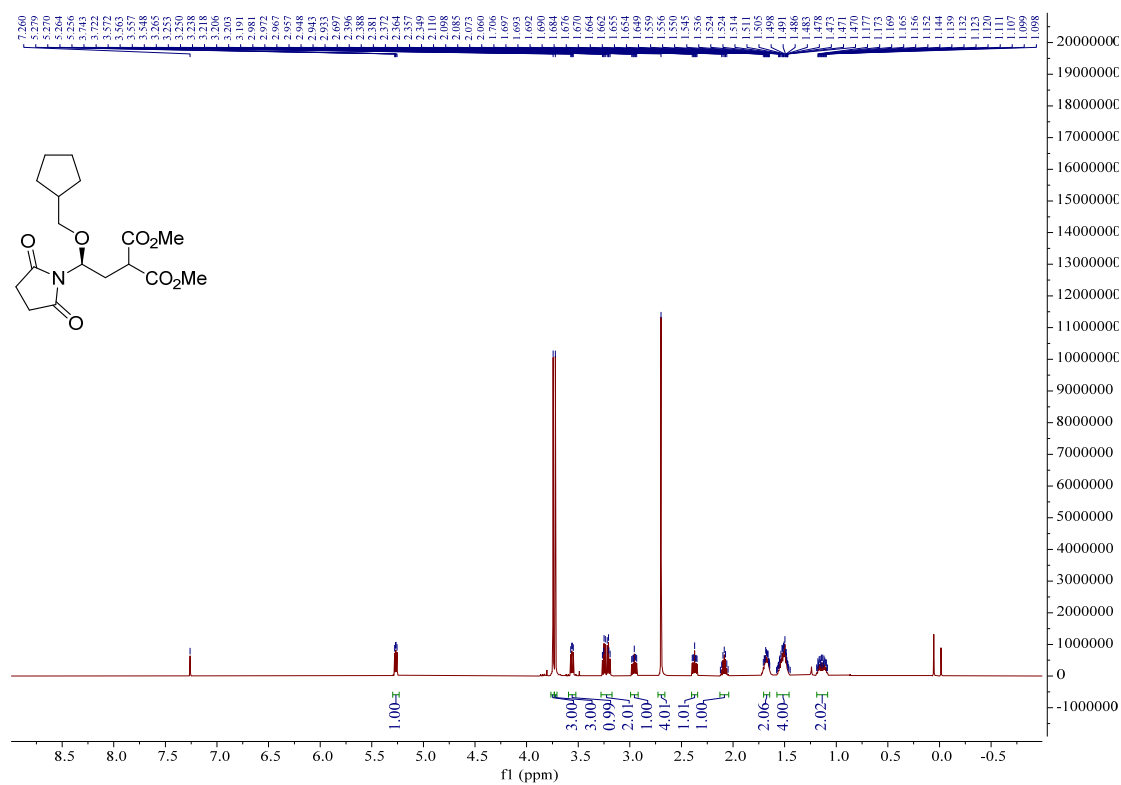

<sup>13</sup>C NMR Spectrum of **3ar** (150 MHz, CDCl<sub>3</sub>)

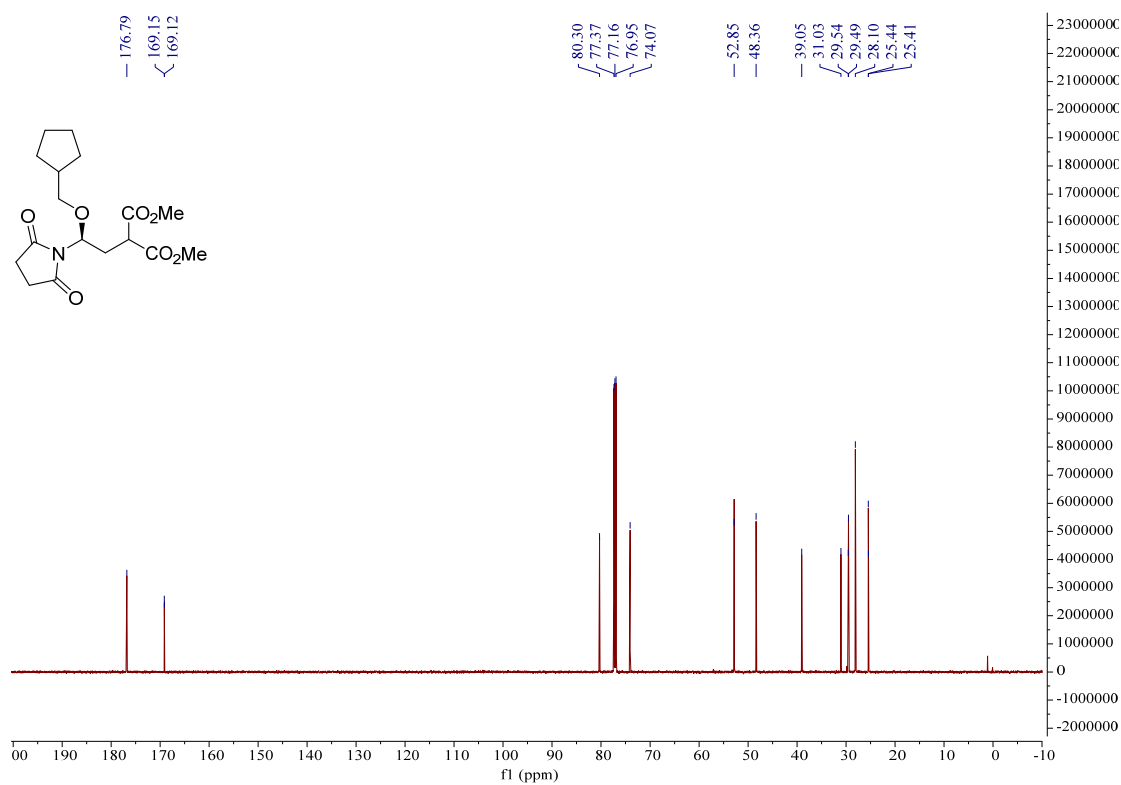



<sup>1</sup>H NMR Spectrum of **3as** (600 MHz, CDCl<sub>3</sub>)

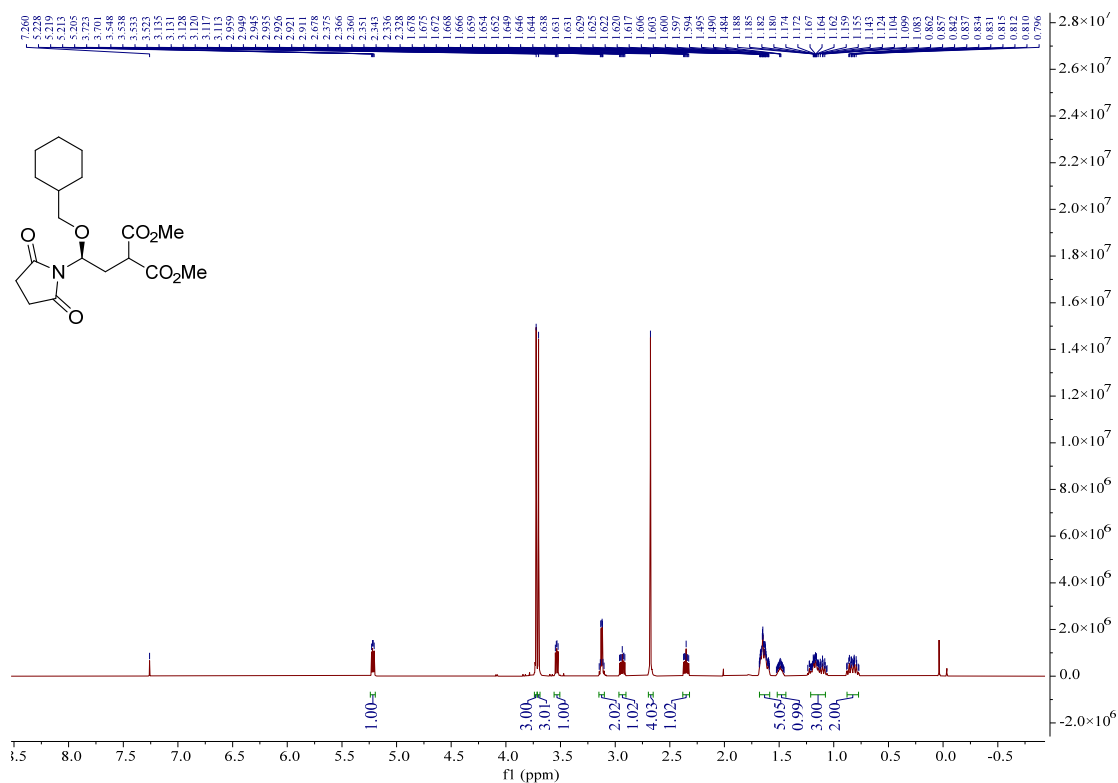

<sup>13</sup>C NMR Spectrum of **3as** (150 MHz, CDCl<sub>3</sub>)

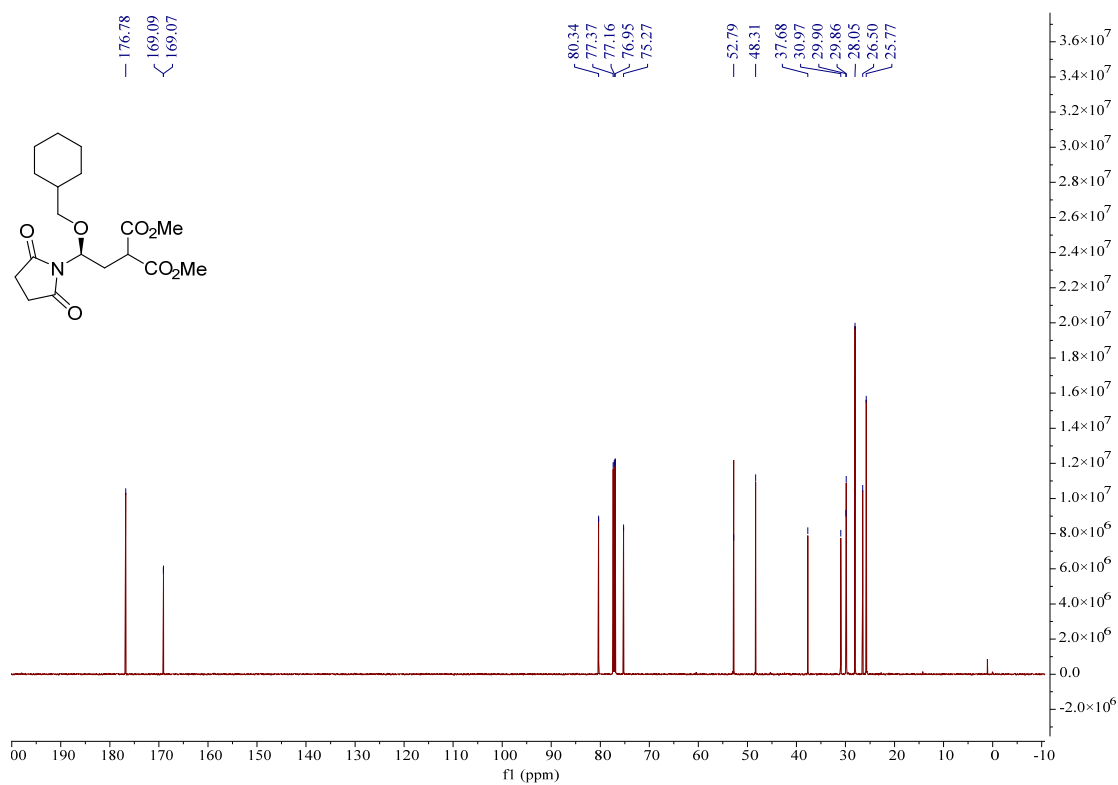

<sup>1</sup>H NMR Spectrum of **3at** (600 MHz, CDCl<sub>3</sub>)

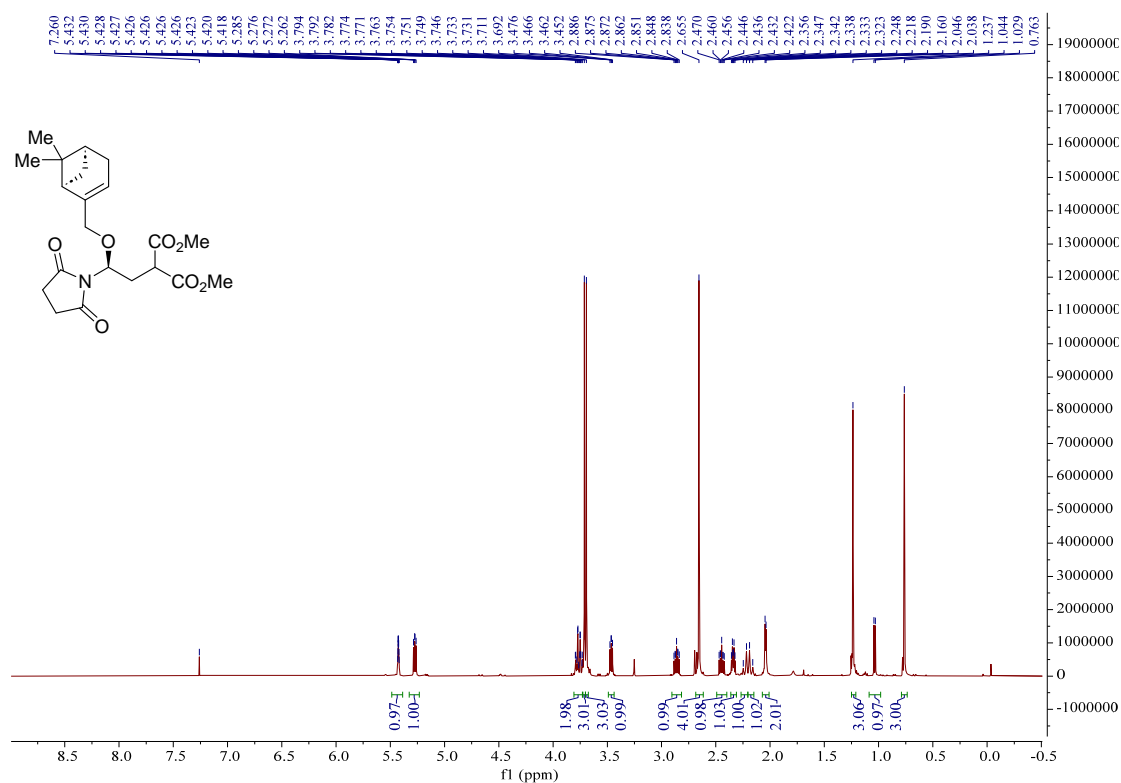

<sup>13</sup>C NMR Spectrum of **3at** (150 MHz, CDCl<sub>3</sub>)

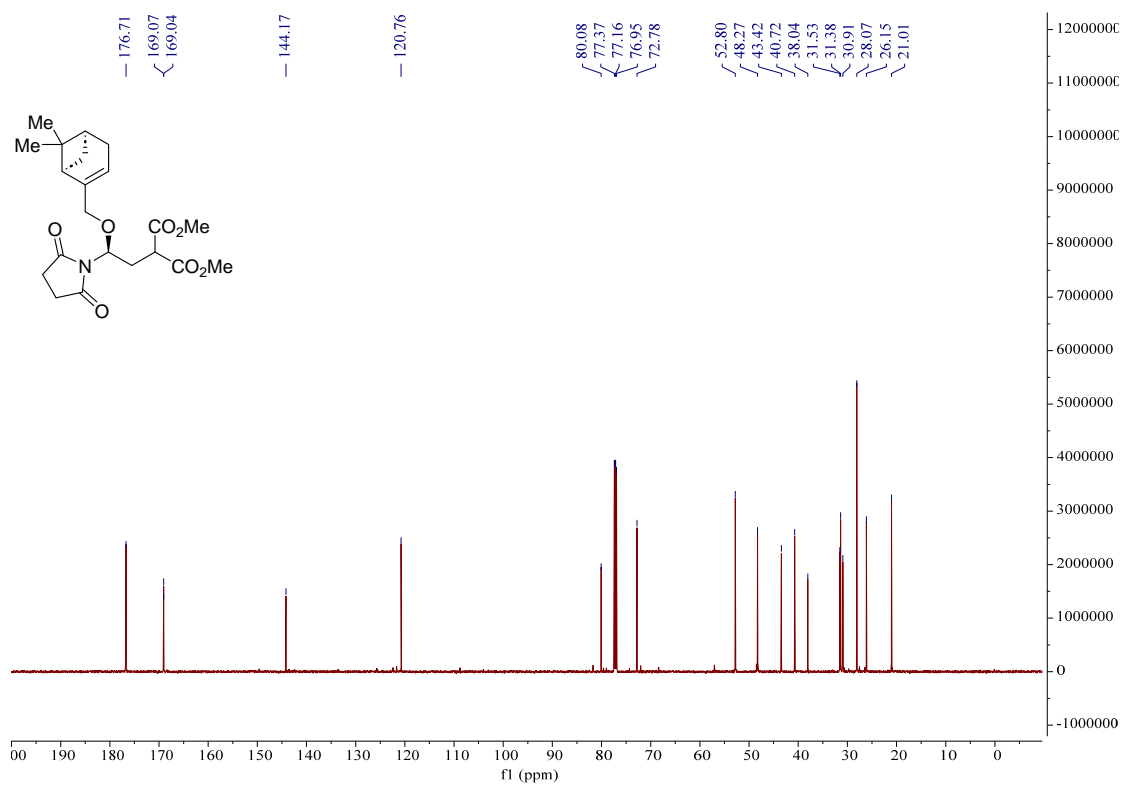

<sup>1</sup>H NMR Spectrum of **3at'** (400 MHz, CDCl<sub>3</sub>)

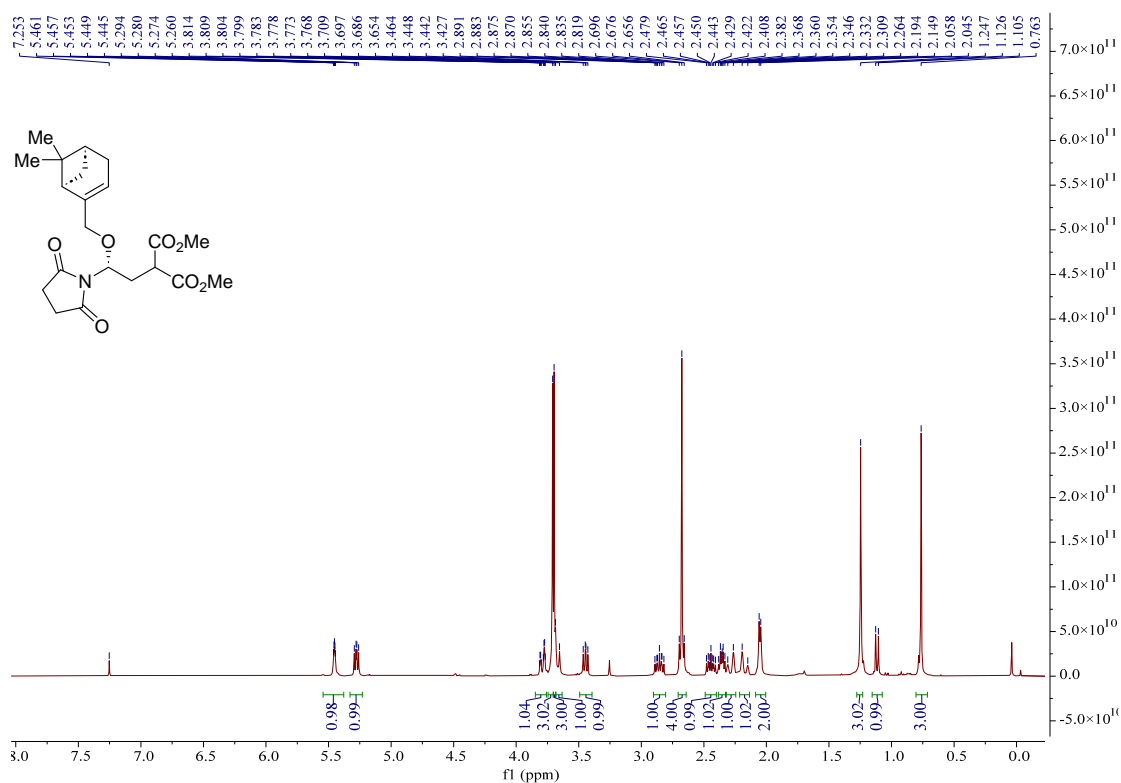

<sup>13</sup>C NMR Spectrum of **3at'** (100 MHz, CDCl<sub>3</sub>)

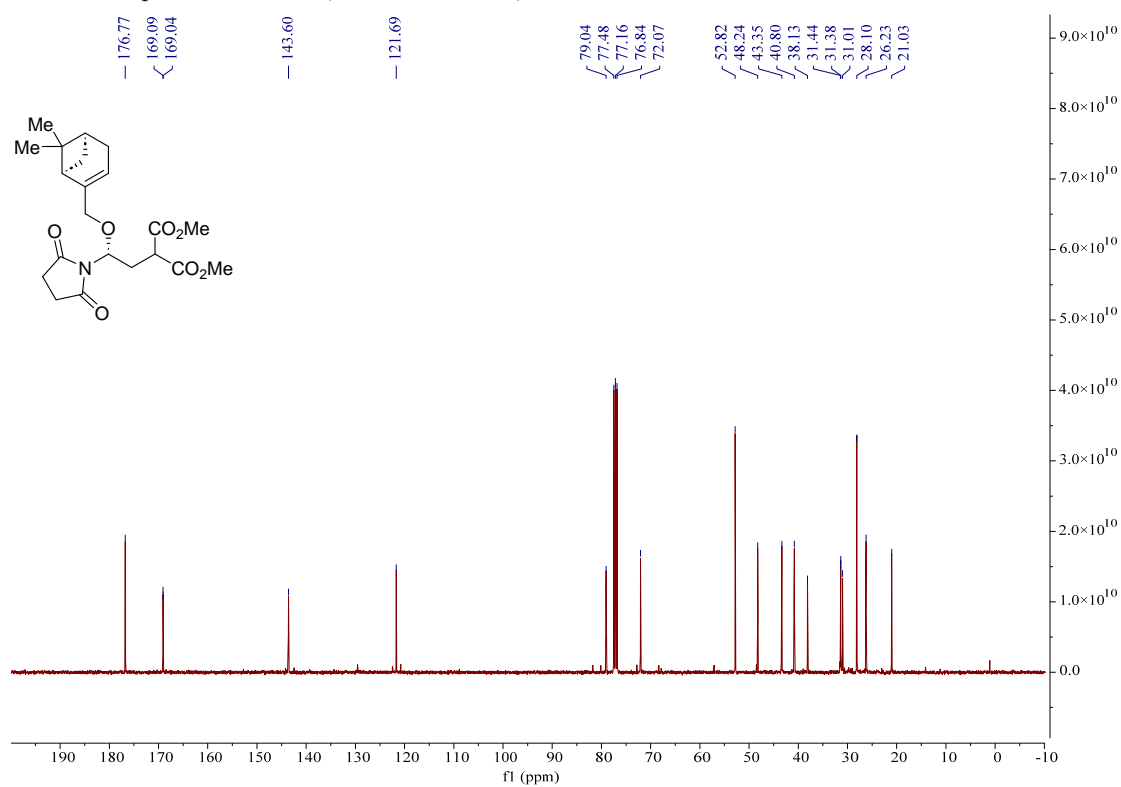

### <sup>1</sup>H NMR Spectrum of **3au** (600 MHz, CDCl<sub>3</sub>)

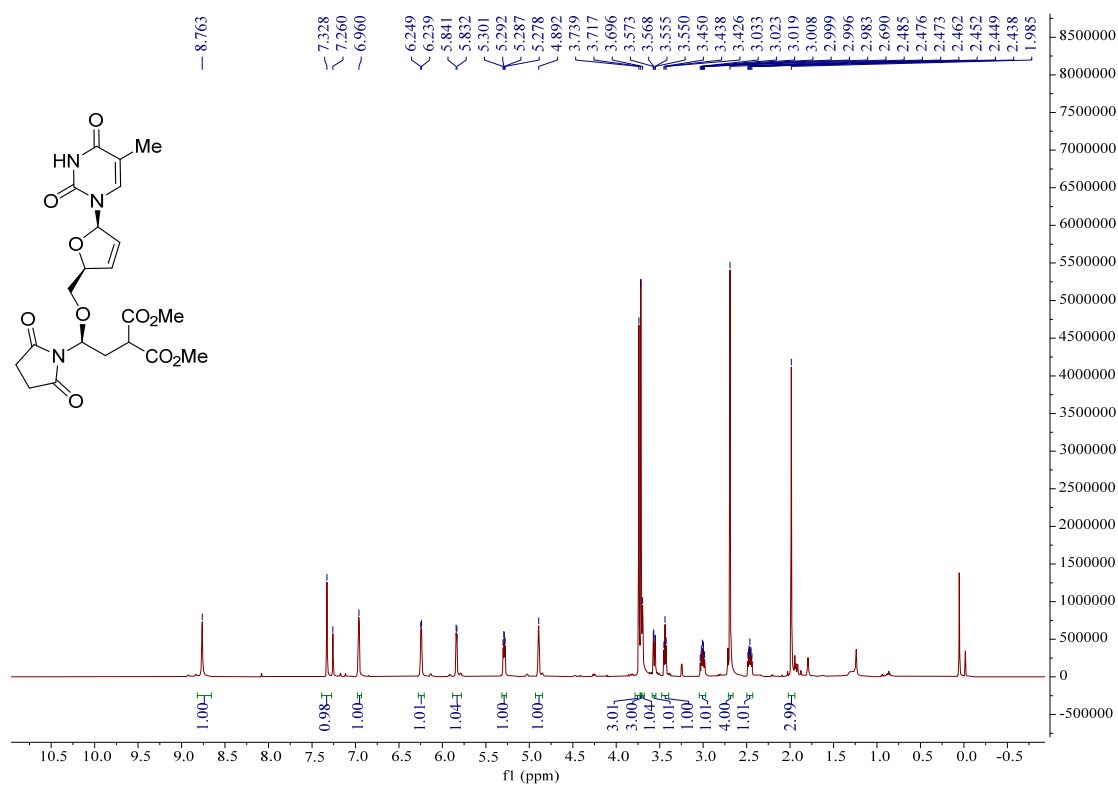

### <sup>13</sup>C NMR Spectrum of **3au** (150 MHz, CDCl<sub>3</sub>)

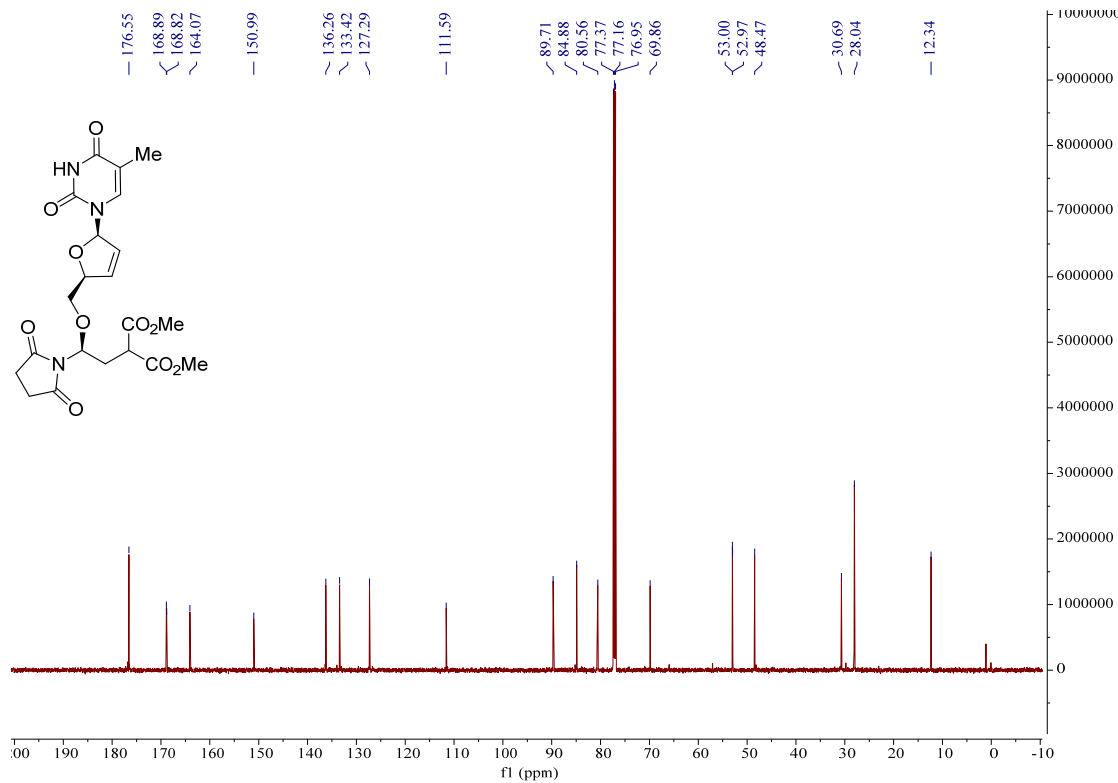

<sup>1</sup>H NMR Spectrum of **3au'** (600 MHz, CDCl<sub>3</sub>)

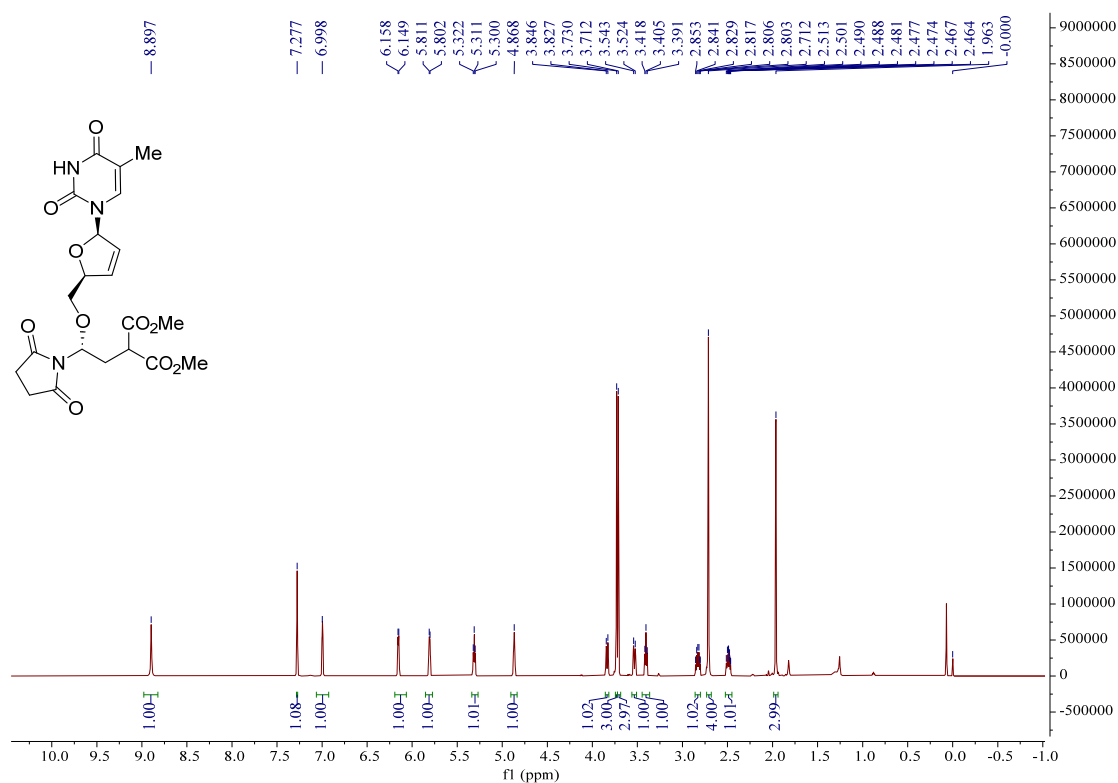

<sup>13</sup>C NMR Spectrum of **3au'** (150 MHz, CDCl<sub>3</sub>)

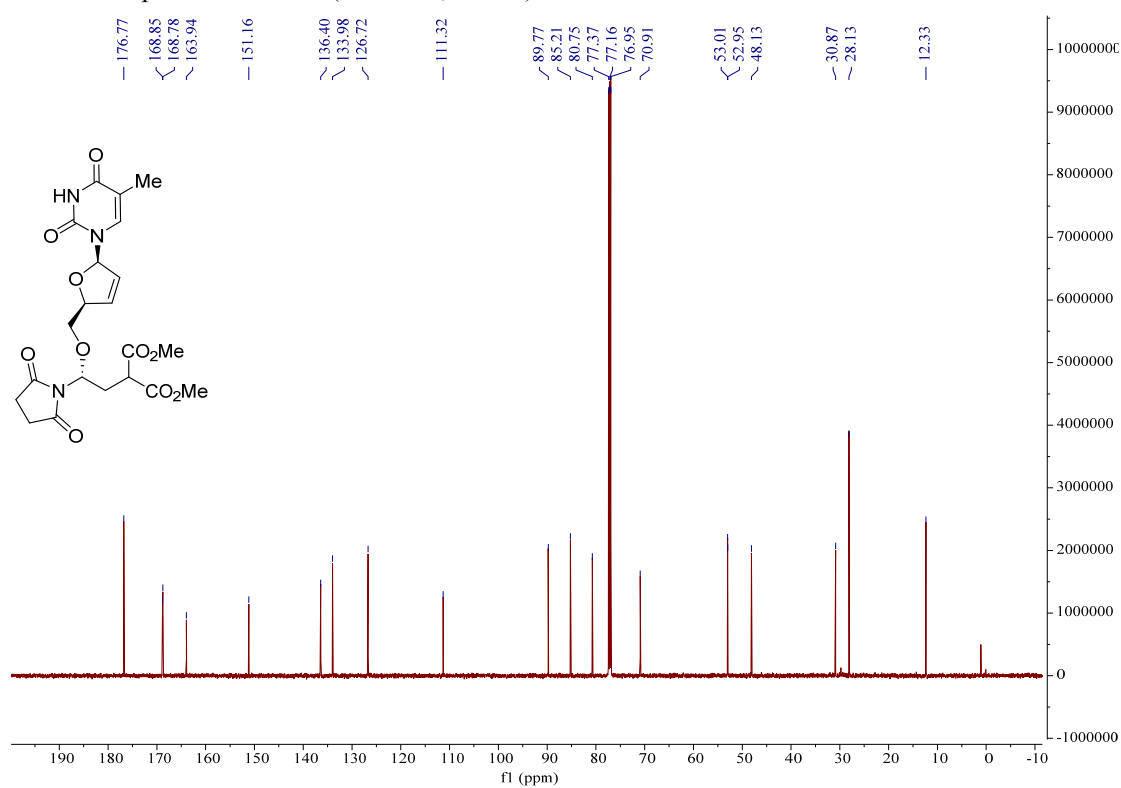

### <sup>1</sup>H NMR Spectrum of **3av** (600 MHz, CDCl<sub>3</sub>)

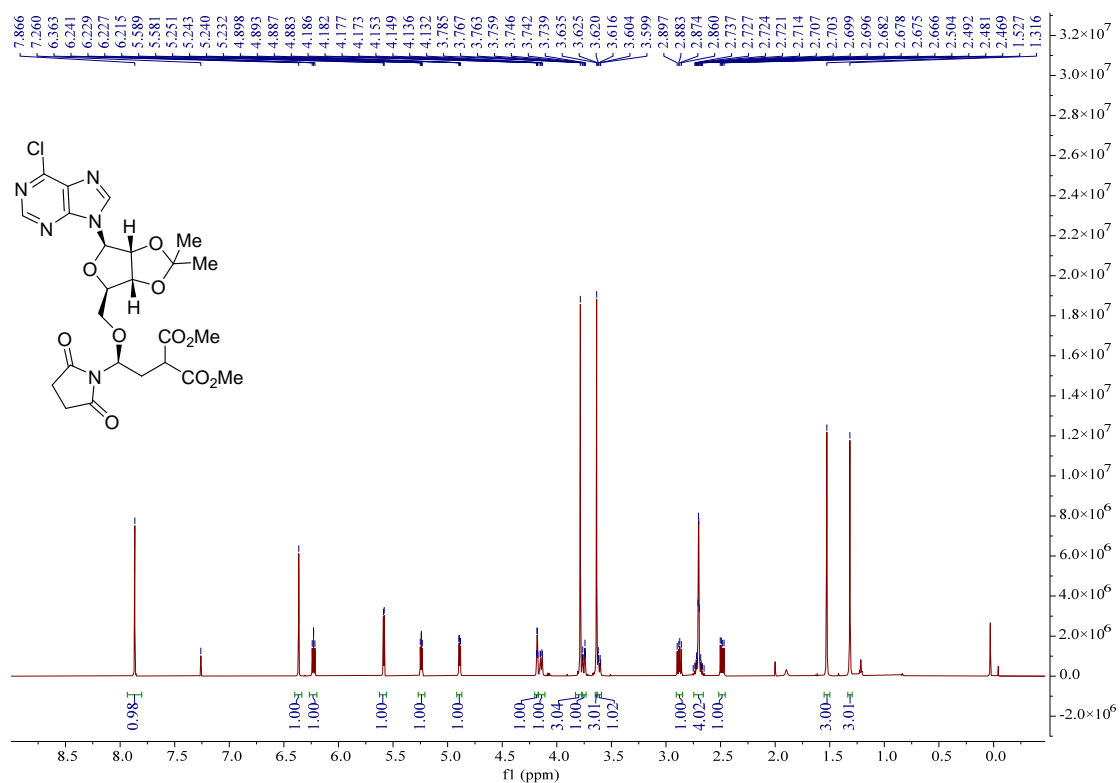

### <sup>13</sup>C NMR Spectrum of **3av** (150 MHz, CDCl<sub>3</sub>)

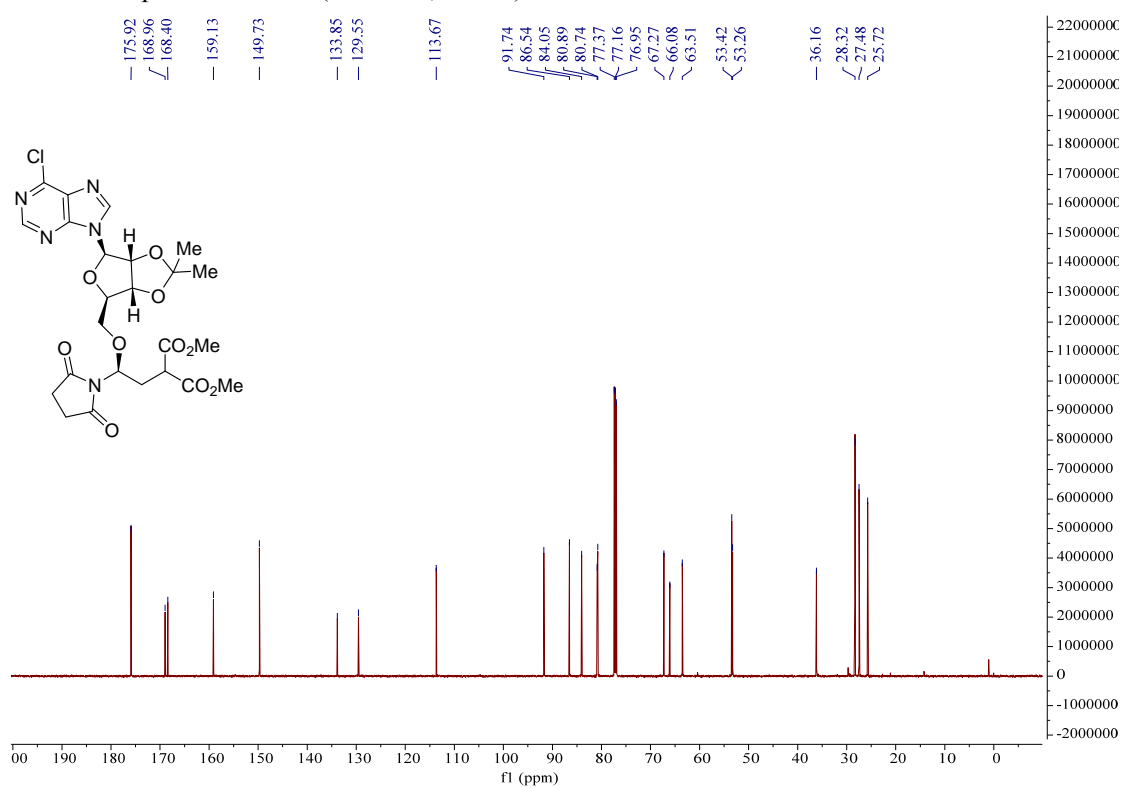

<sup>1</sup>H NMR Spectrum of **3av'** (600 MHz, CDCl<sub>3</sub>)

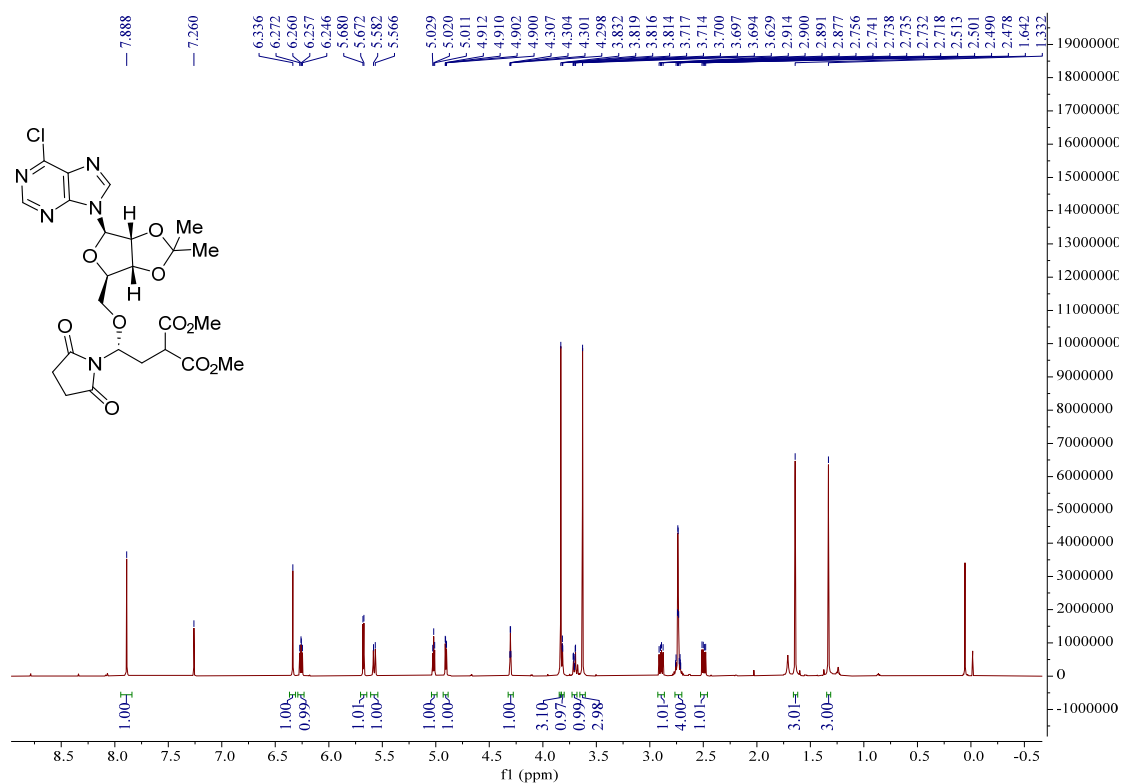

<sup>13</sup>C NMR Spectrum of **3av'** (150 MHz, CDCl<sub>3</sub>)

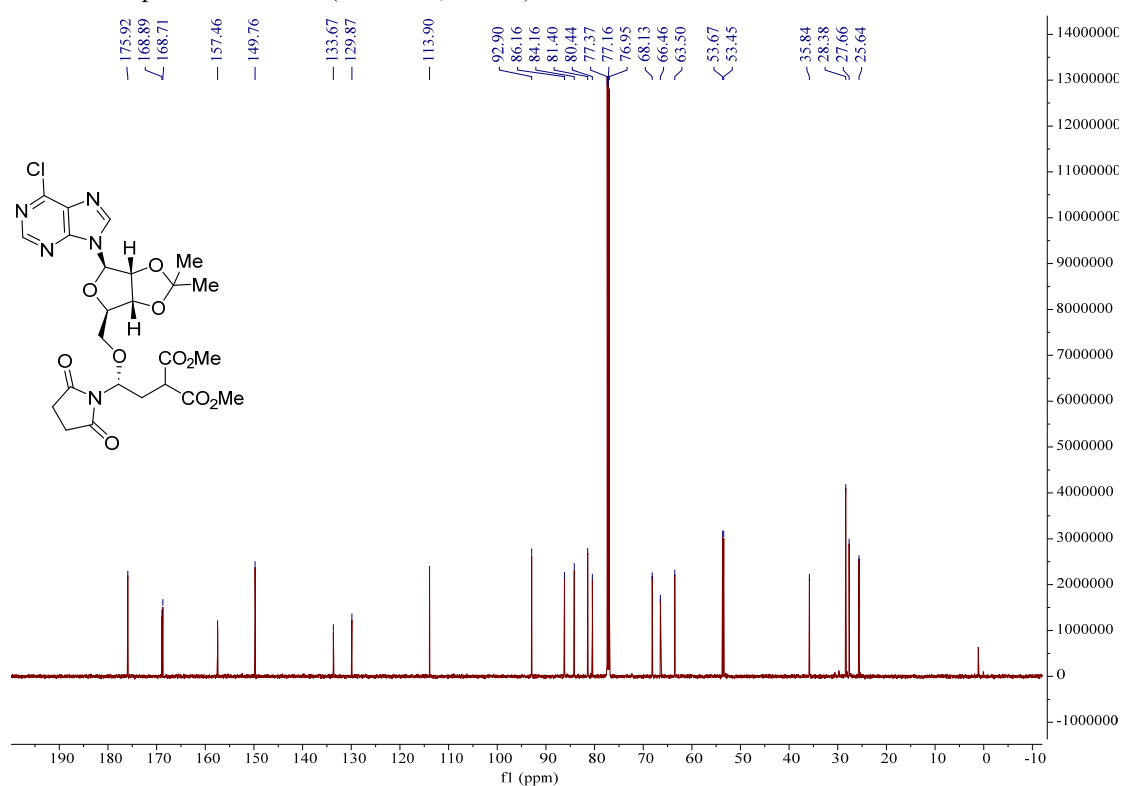

<sup>1</sup>H NMR Spectrum of **3ba** (600 MHz, CDCl<sub>3</sub>)

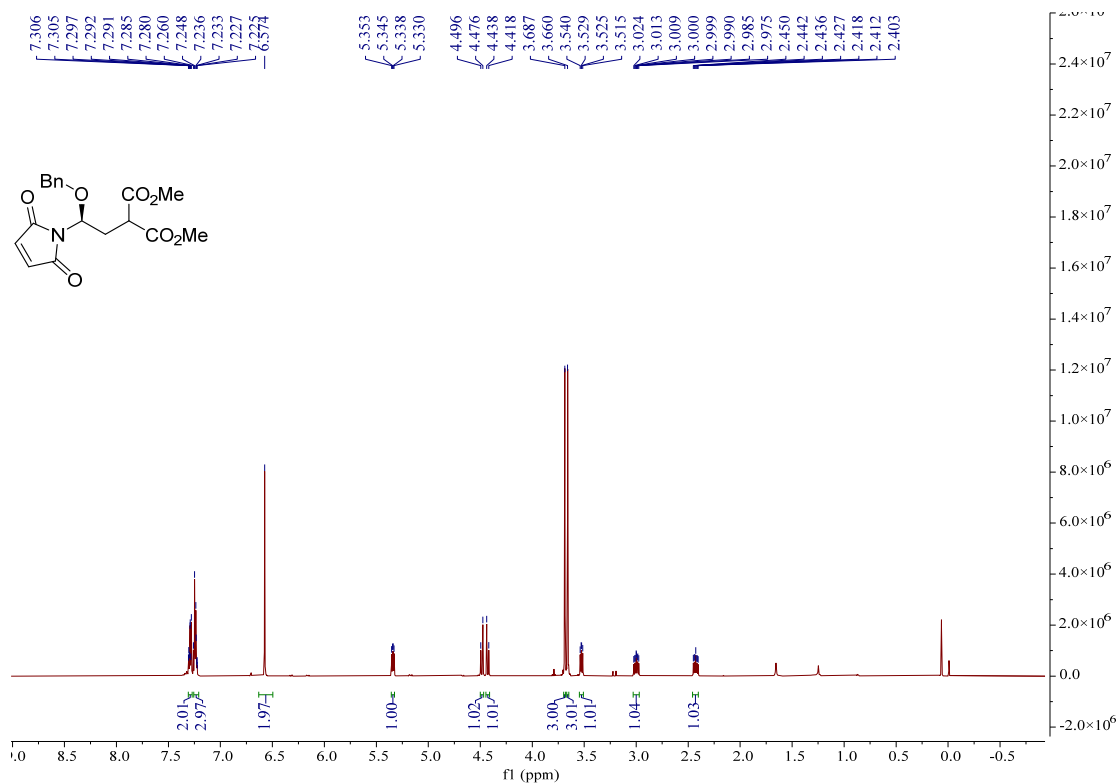

<sup>13</sup>C NMR Spectrum of **3aw** (150 MHz, CDCl<sub>3</sub>)

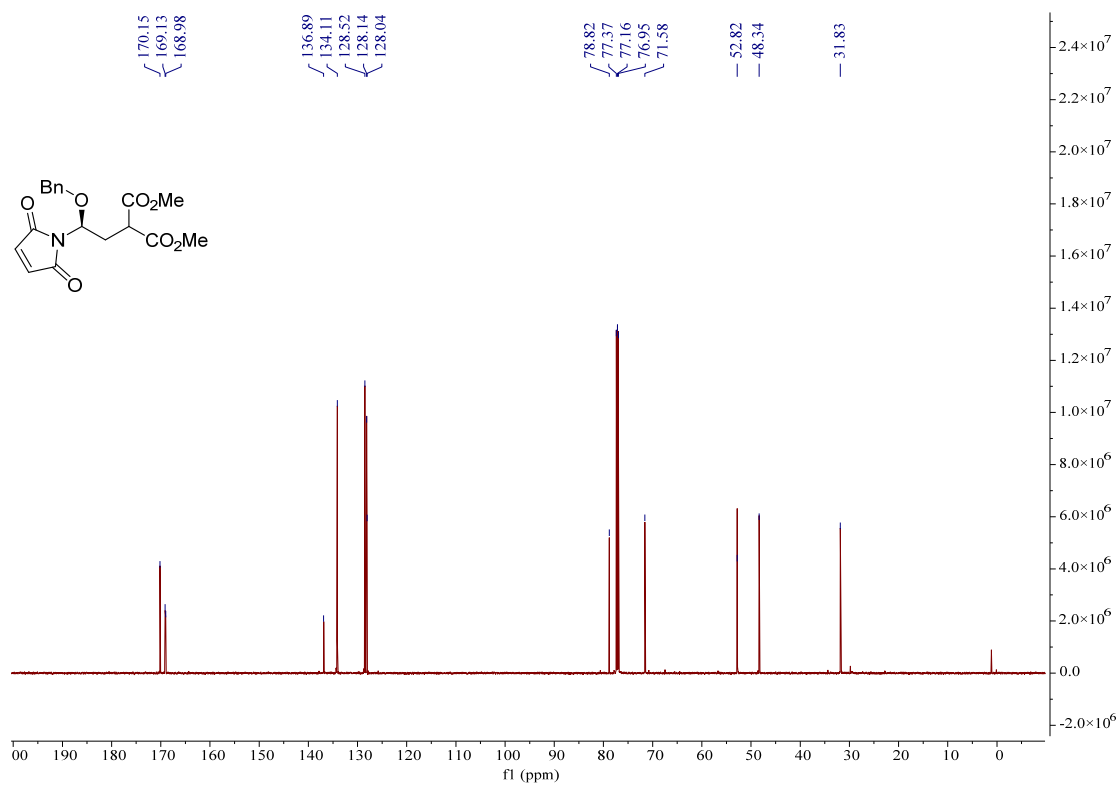



### <sup>1</sup>H NMR Spectrum of **3ca** (400 MHz, CDCl<sub>3</sub>)

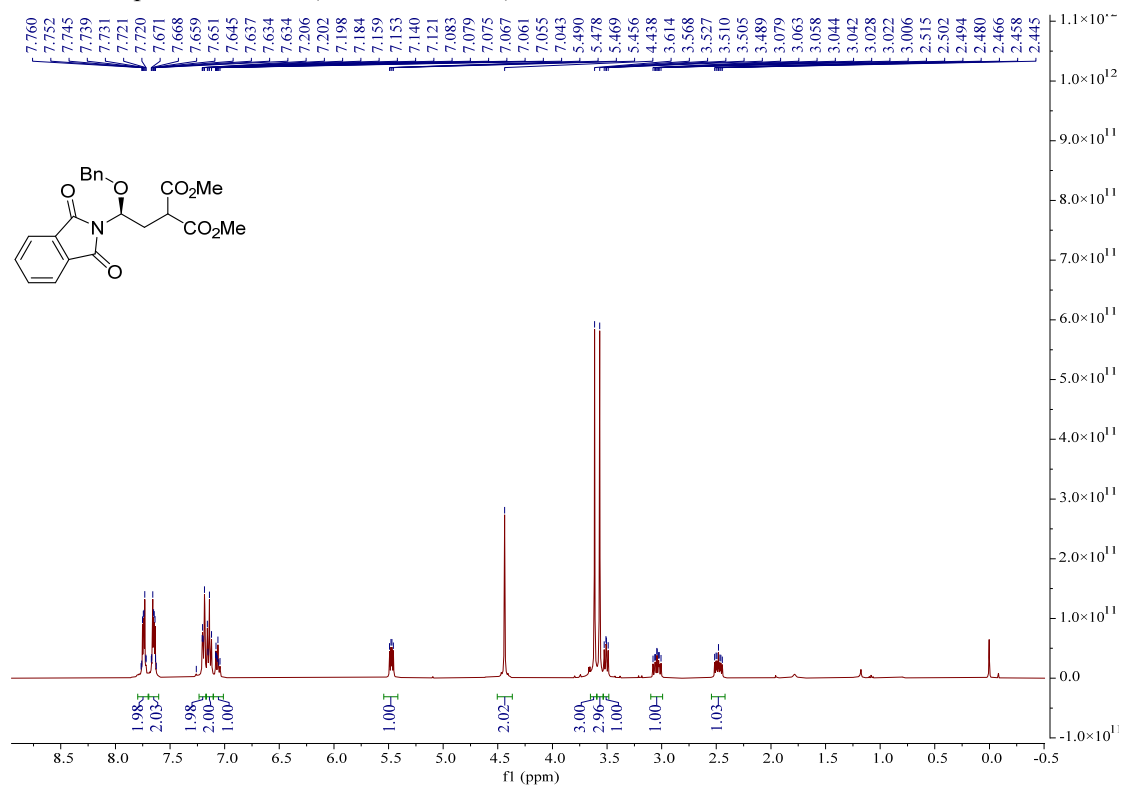

### <sup>13</sup>C NMR Spectrum of **3ca** (100 MHz, CDCl<sub>3</sub>)

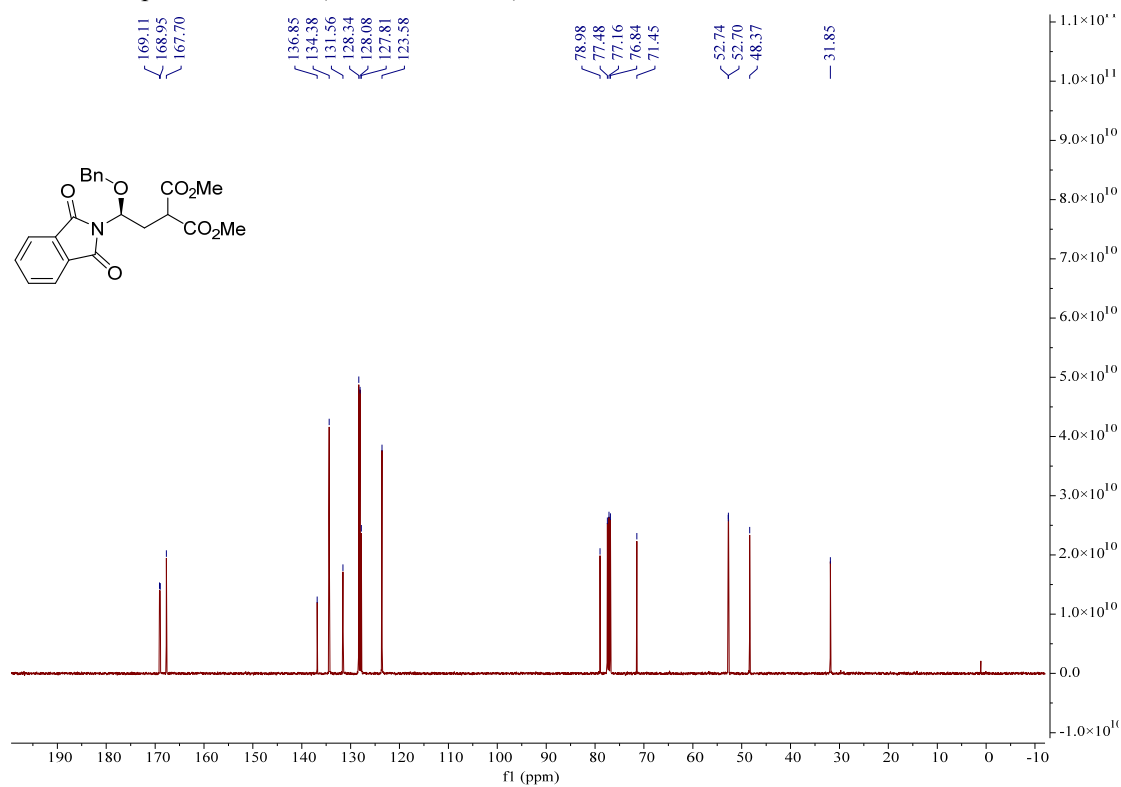

### <sup>1</sup>H NMR Spectrum of **3da** (600 MHz, CDCl<sub>3</sub>)

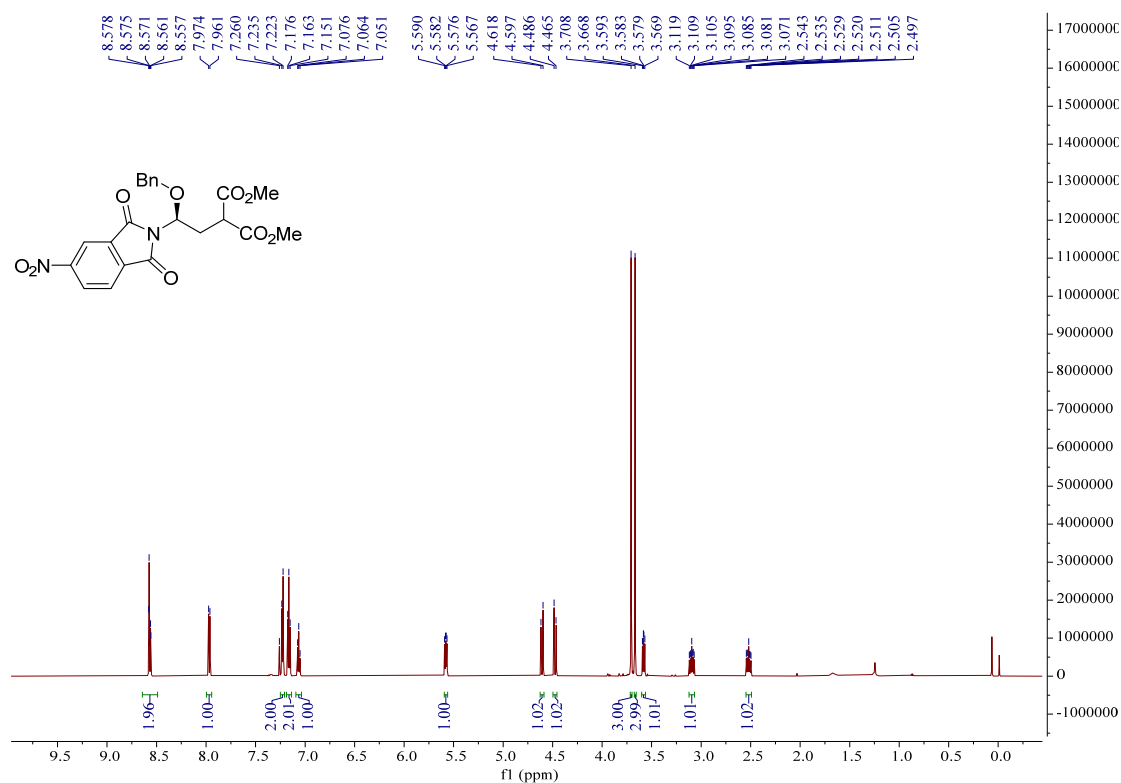

### <sup>13</sup>C NMR Spectrum of **3da** (150 MHz, CDCl<sub>3</sub>)

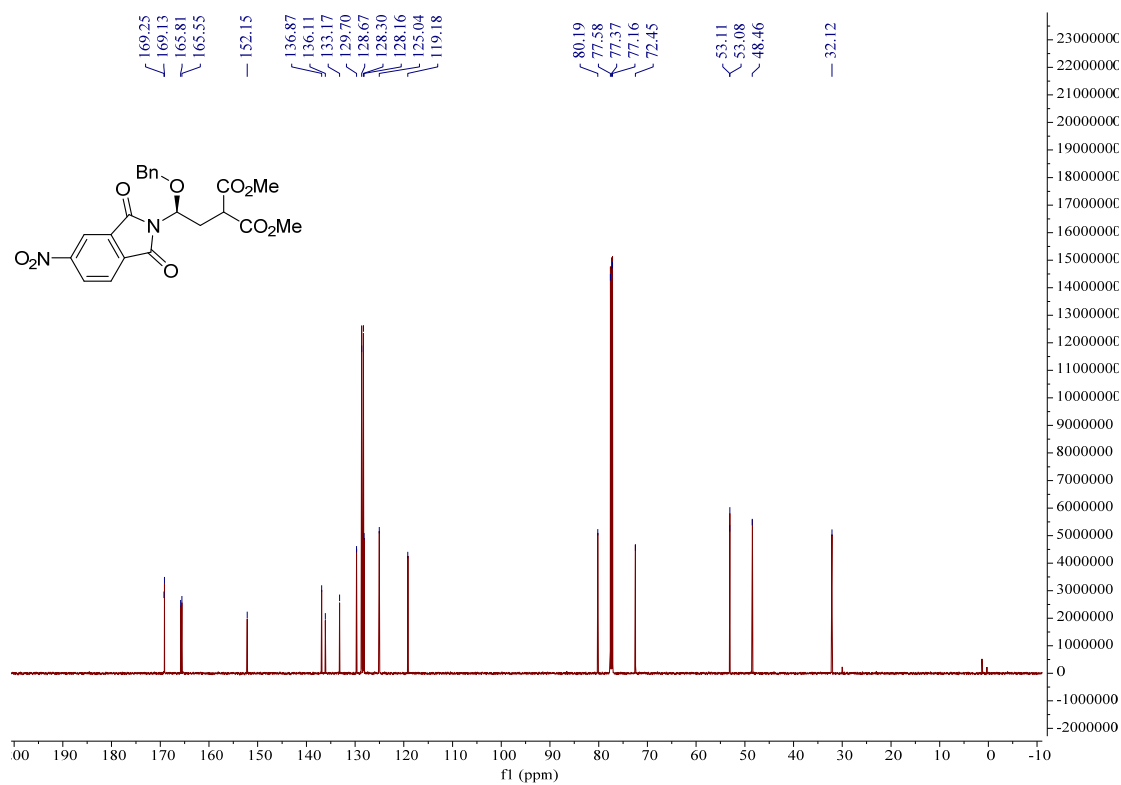

<sup>1</sup>H NMR Spectrum of **3ea** (600 MHz, CDCl<sub>3</sub>)

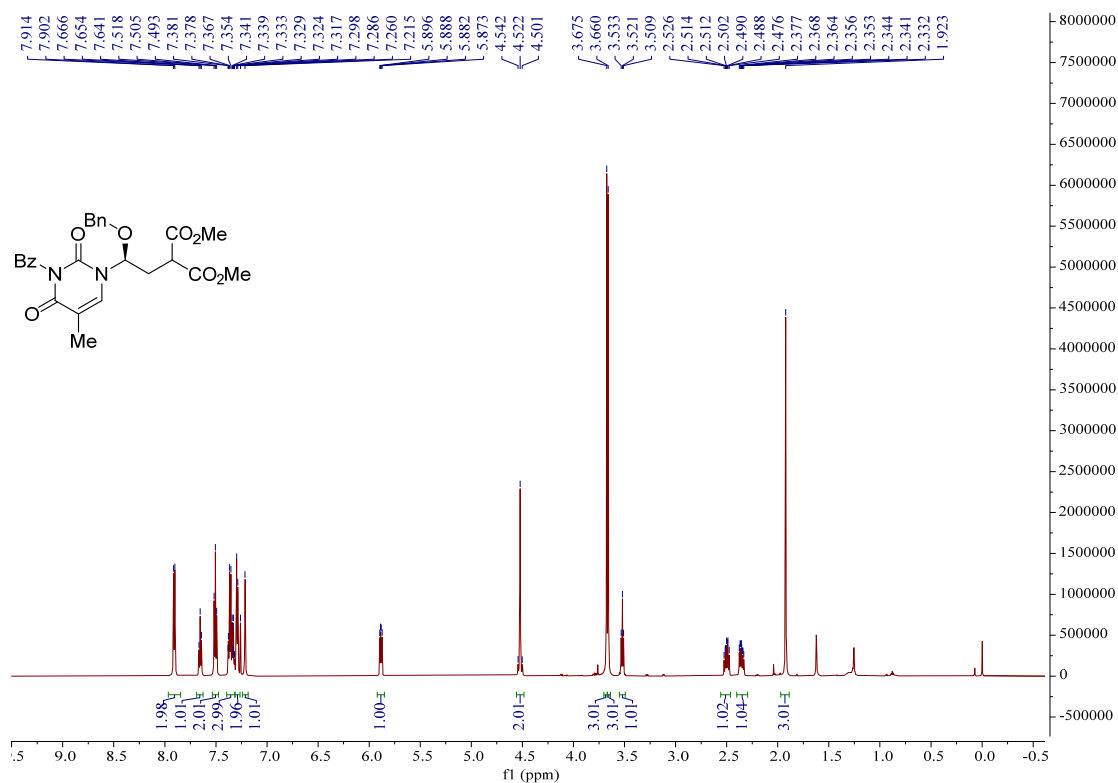

<sup>13</sup>C NMR Spectrum of **3ea** (150 MHz, CDCl<sub>3</sub>)

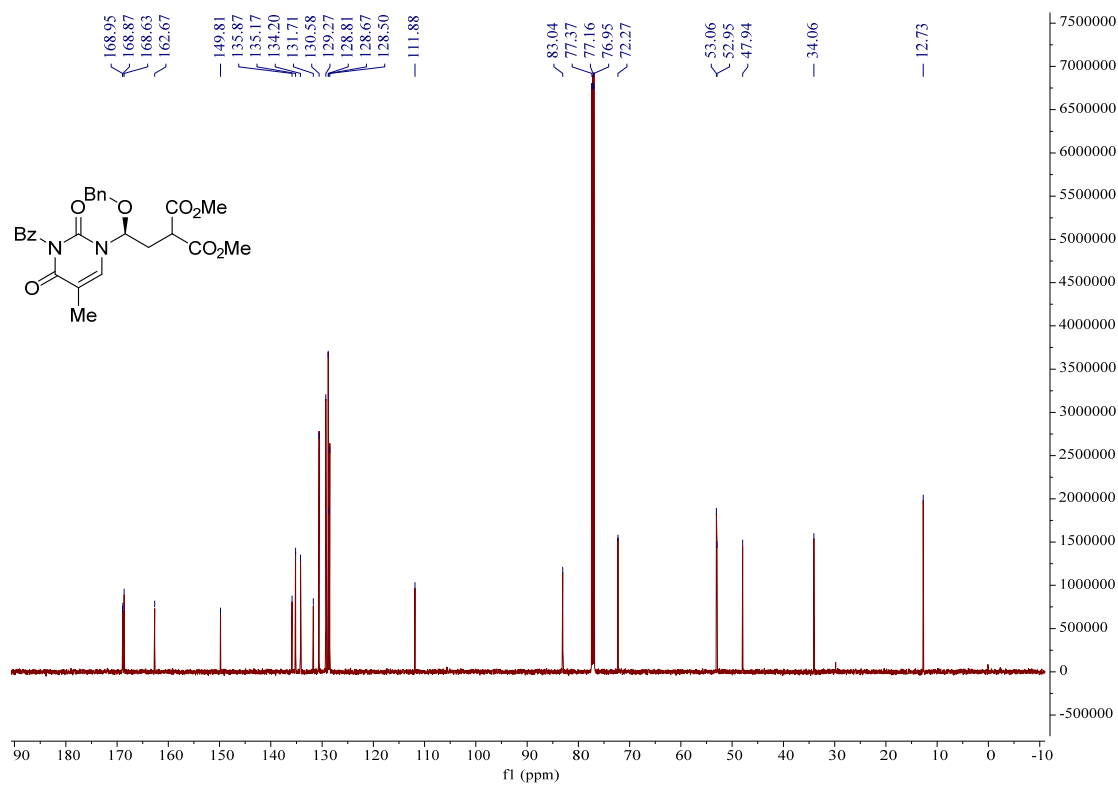

<sup>1</sup>H NMR Spectrum of **5aa** (600 MHz, CDCl<sub>3</sub>)

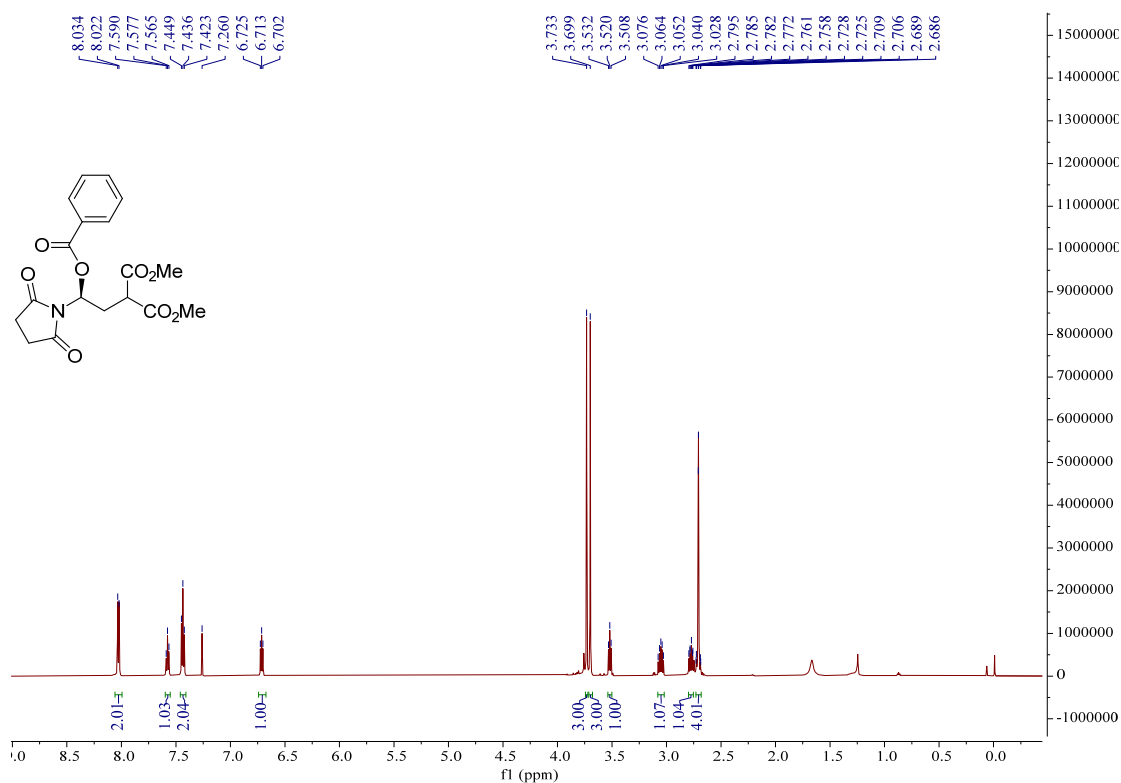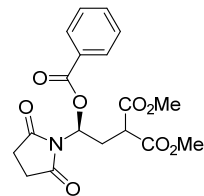

<sup>13</sup>C NMR Spectrum of **5aa** (150 MHz, CDCl<sub>3</sub>)

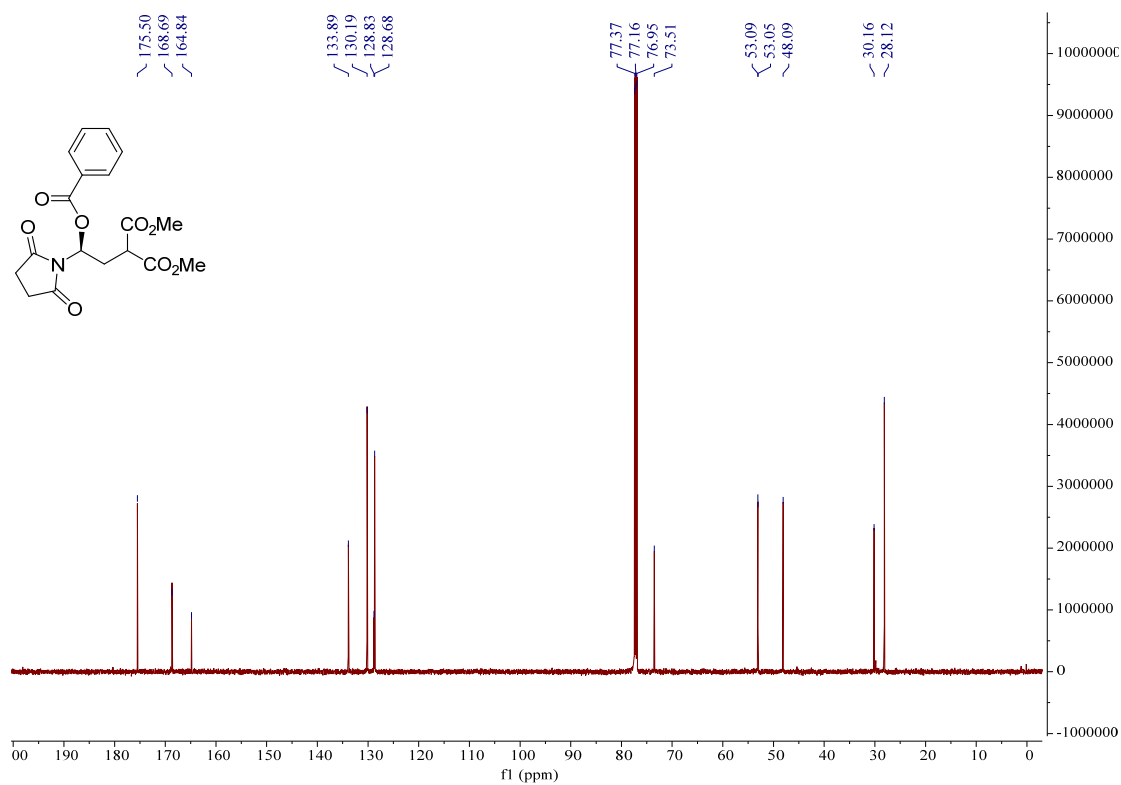

### <sup>1</sup>H NMR Spectrum of **5ab** (600 MHz, CDCl<sub>3</sub>)

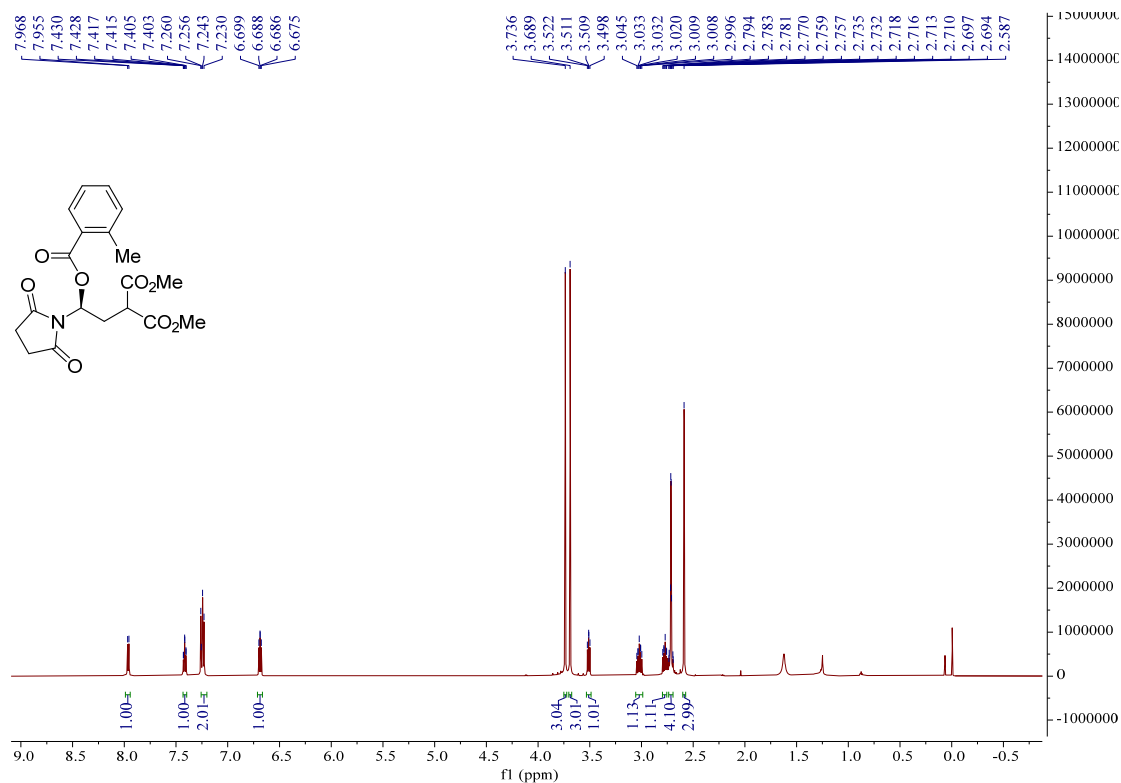

### <sup>13</sup>C NMR Spectrum of **5ab** (150 MHz, CDCl<sub>3</sub>)

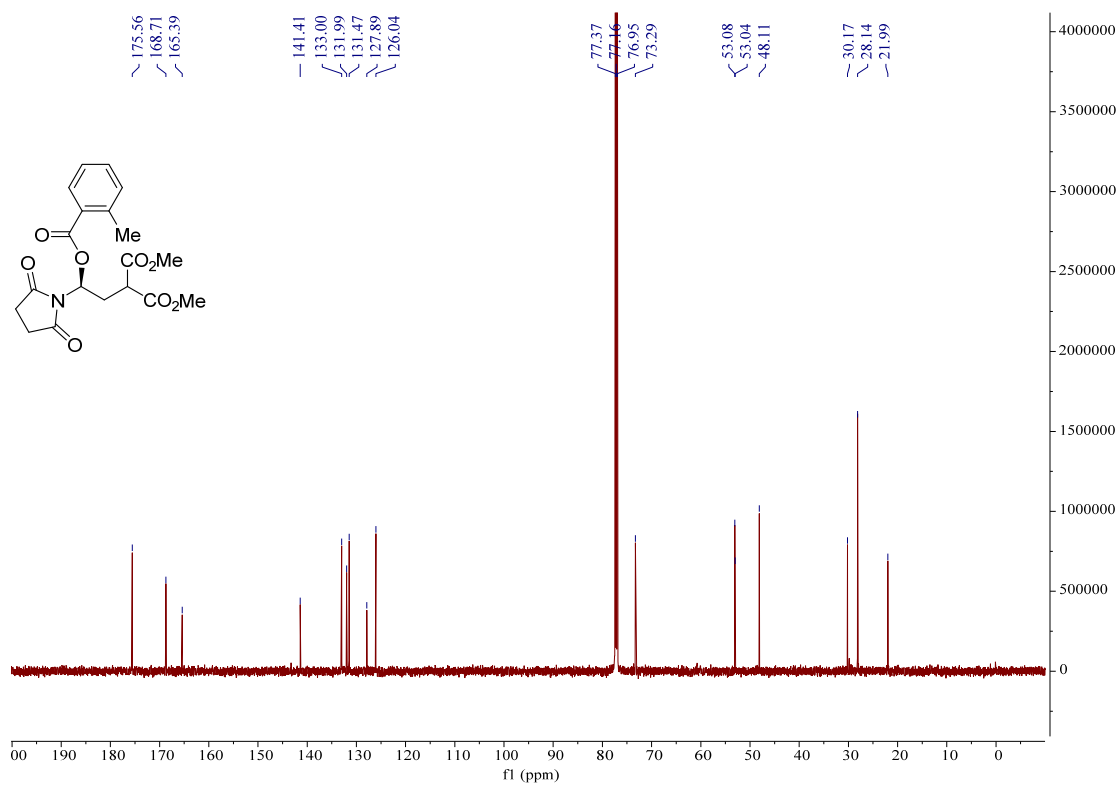

### <sup>1</sup>H NMR Spectrum of **5ac** (400 MHz, CDCl<sub>3</sub>)

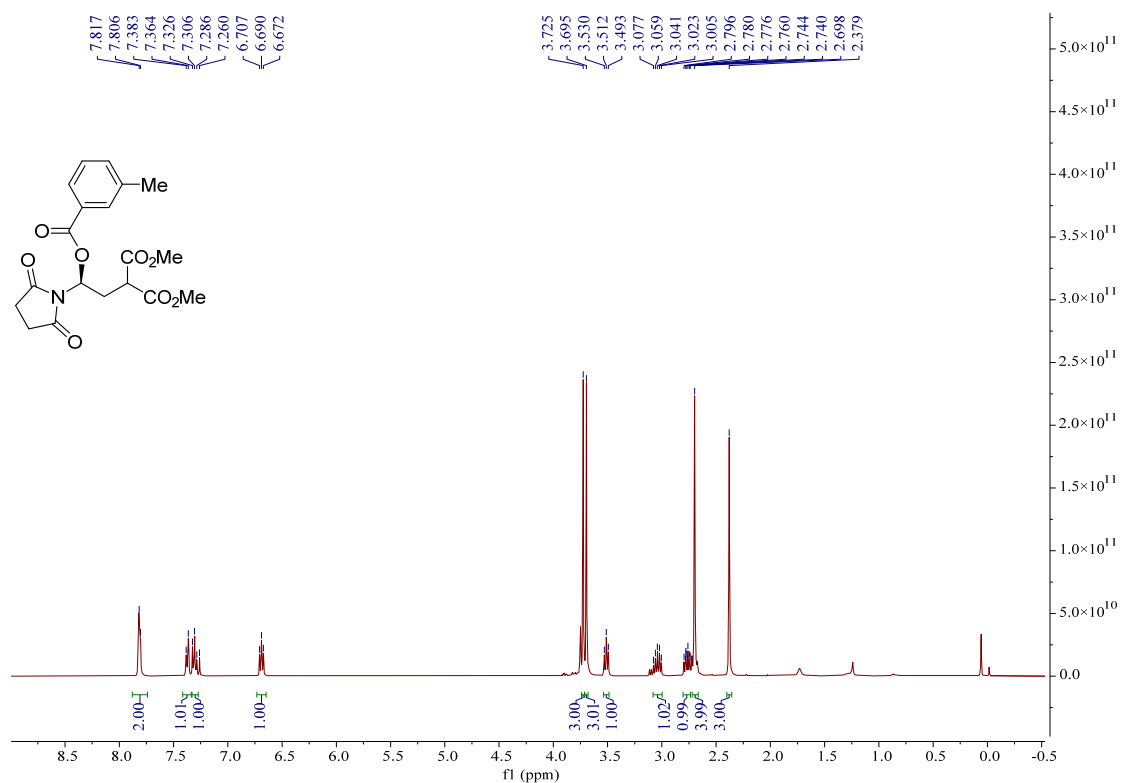

### <sup>13</sup>C NMR Spectrum of **5ac** (100 MHz, CDCl<sub>3</sub>)

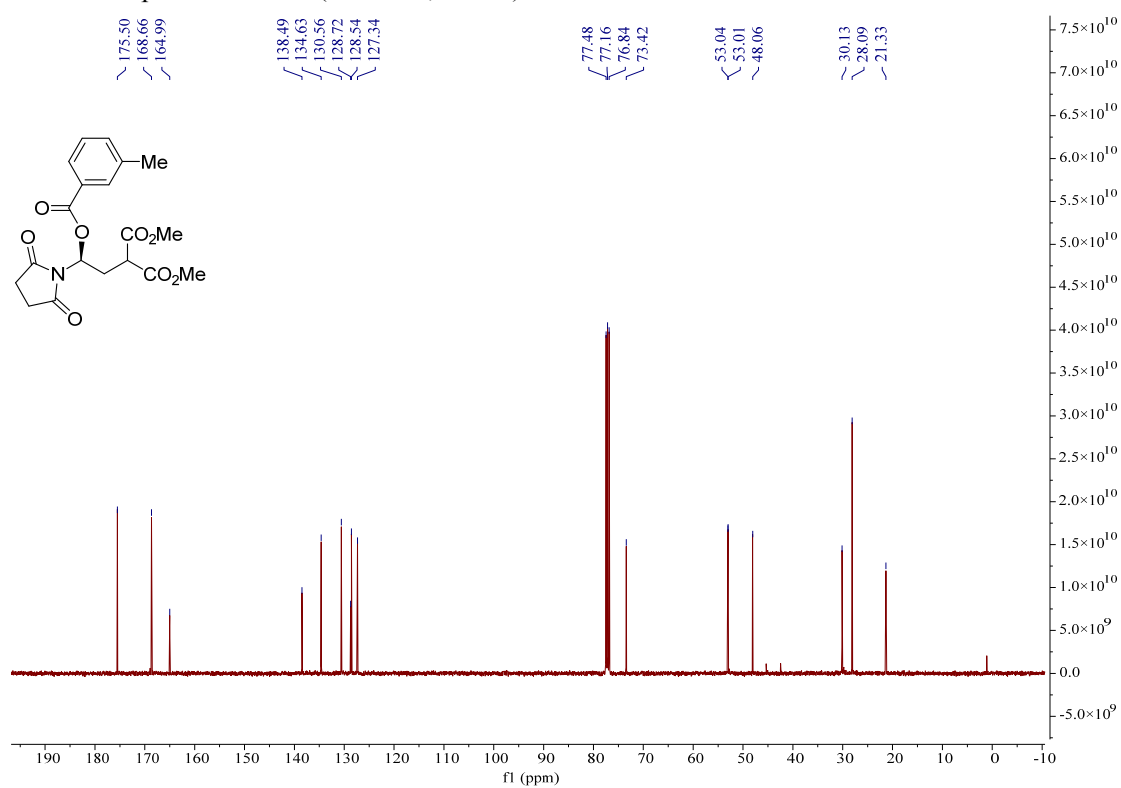

### <sup>1</sup>H NMR Spectrum of **5ad** (600 MHz, CDCl<sub>3</sub>)

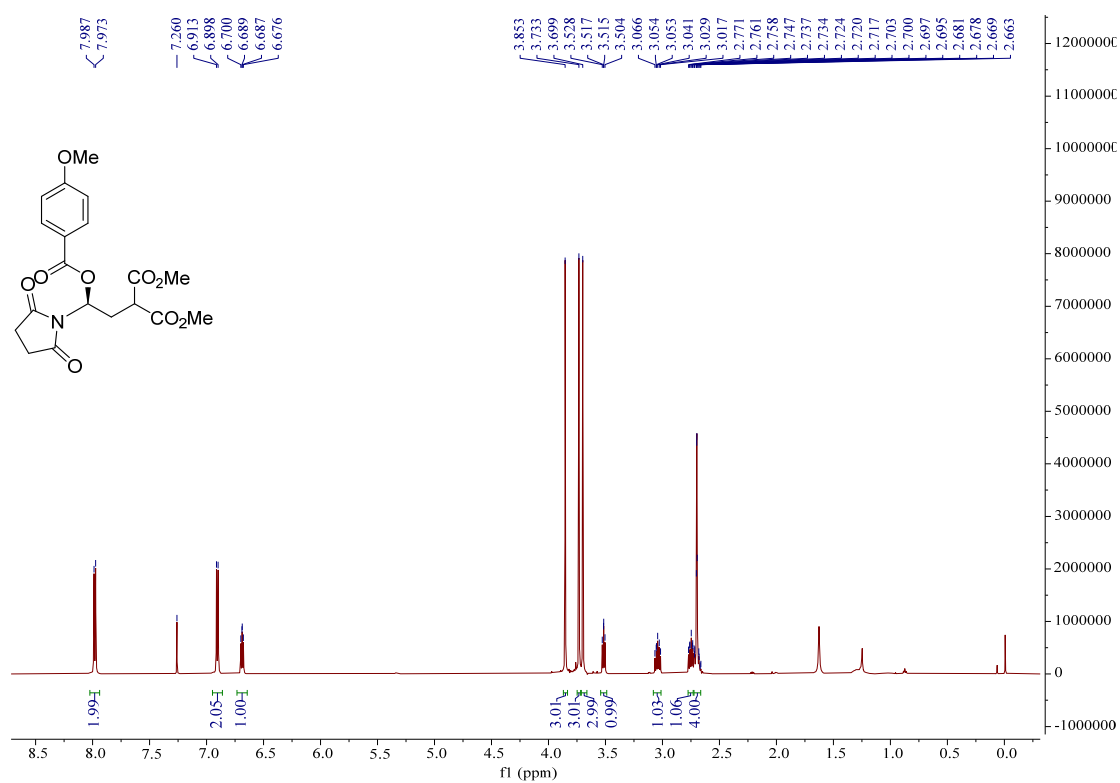

### <sup>13</sup>C NMR Spectrum of **5ad** (150 MHz, CDCl<sub>3</sub>)

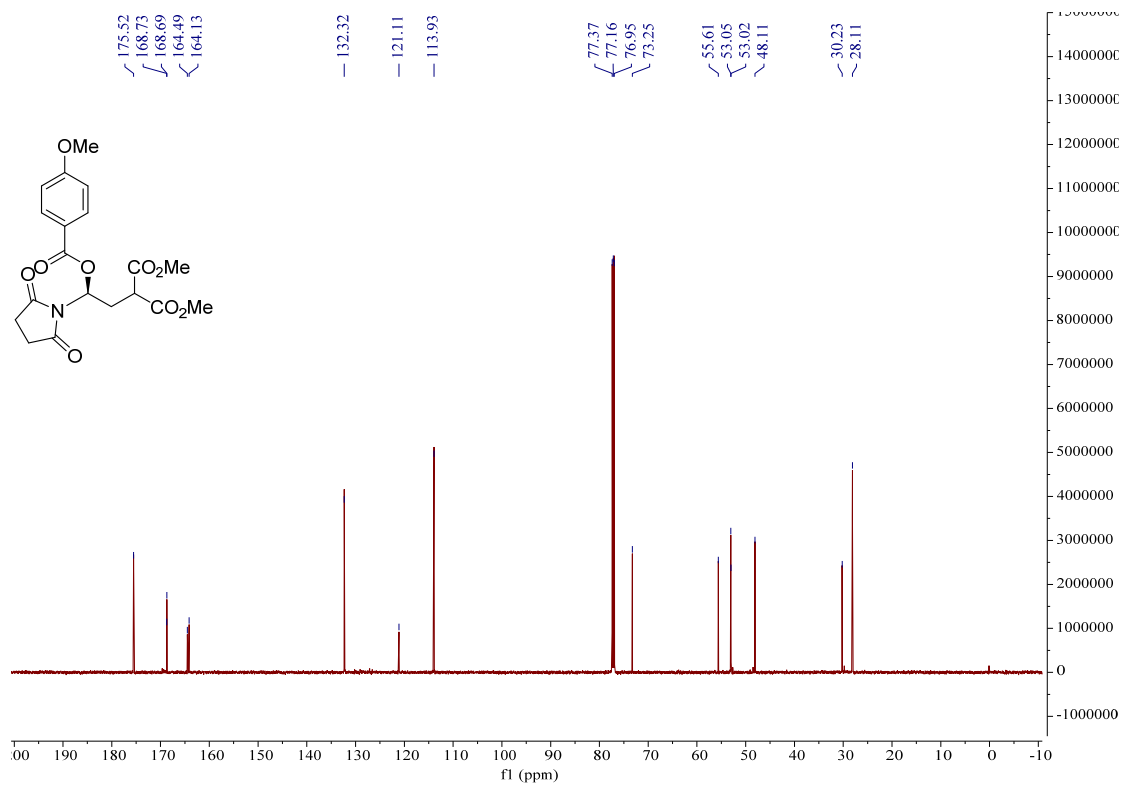

<sup>1</sup>H NMR Spectrum of **5ae** (400 MHz, CDCl<sub>3</sub>)

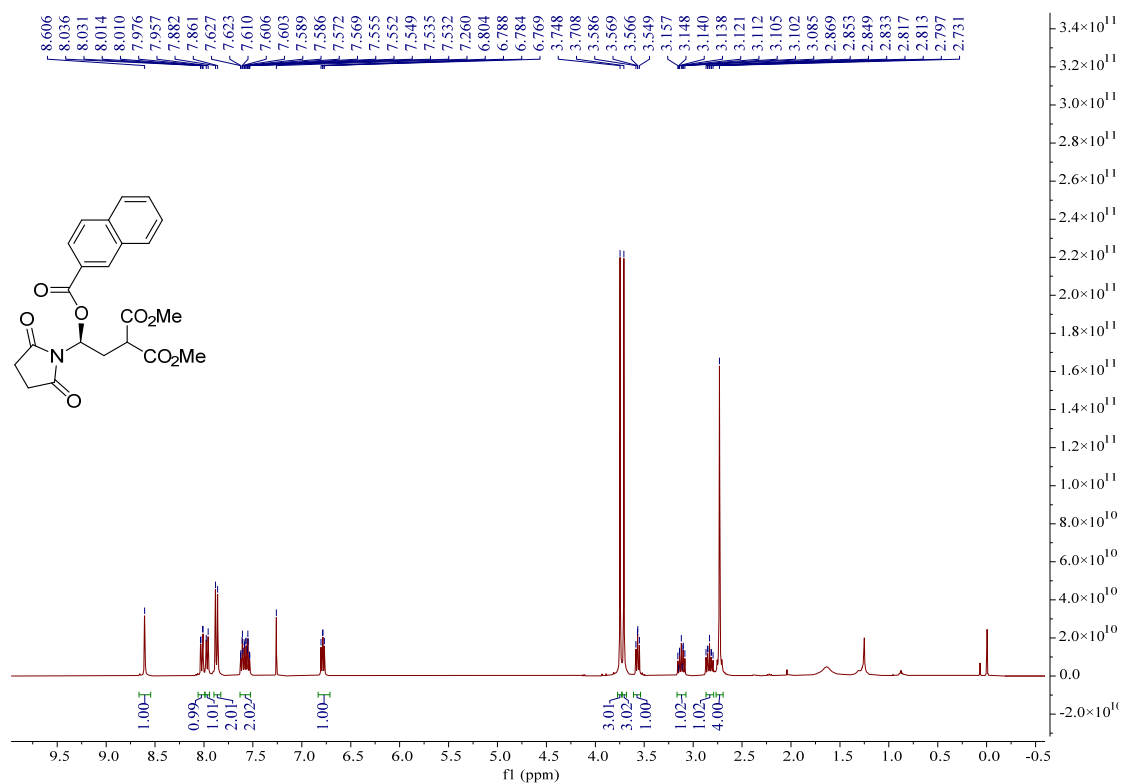

<sup>13</sup>C NMR Spectrum of **5ae** (100 MHz, CDCl<sub>3</sub>)

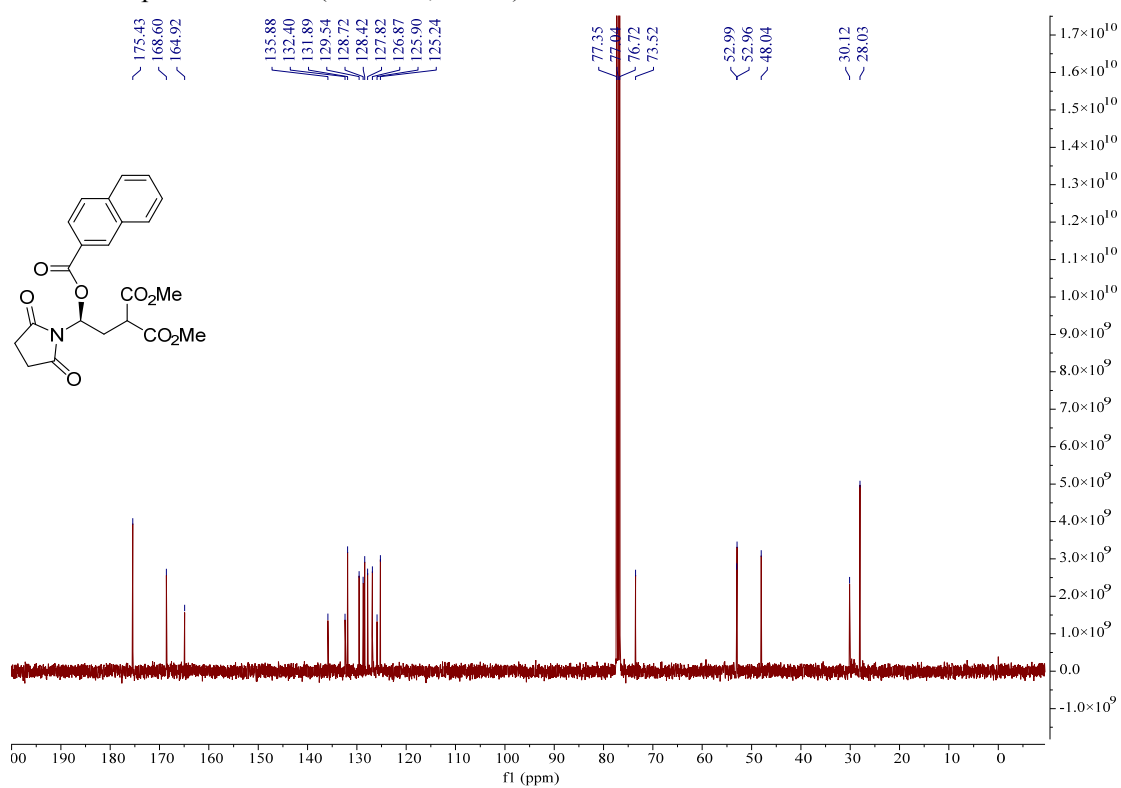



### <sup>1</sup>H NMR Spectrum of **5af** (600 MHz, CDCl<sub>3</sub>)

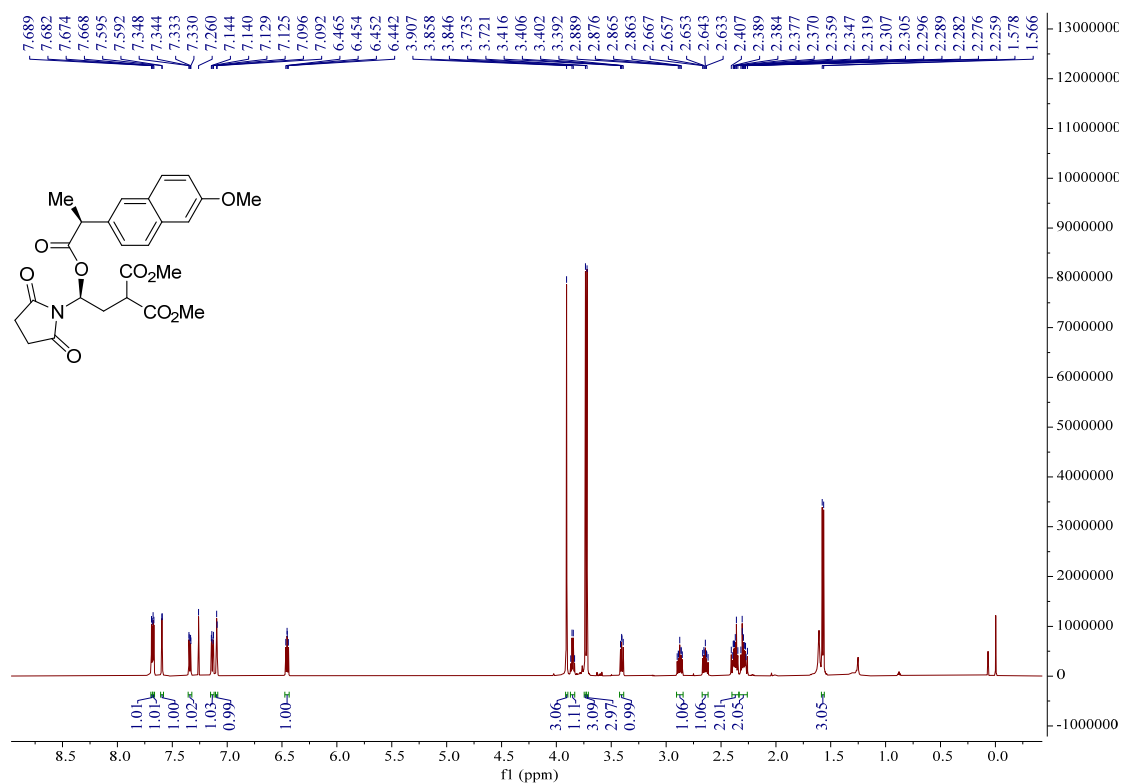

### <sup>13</sup>C NMR Spectrum of **5af** (150 MHz, CDCl<sub>3</sub>)

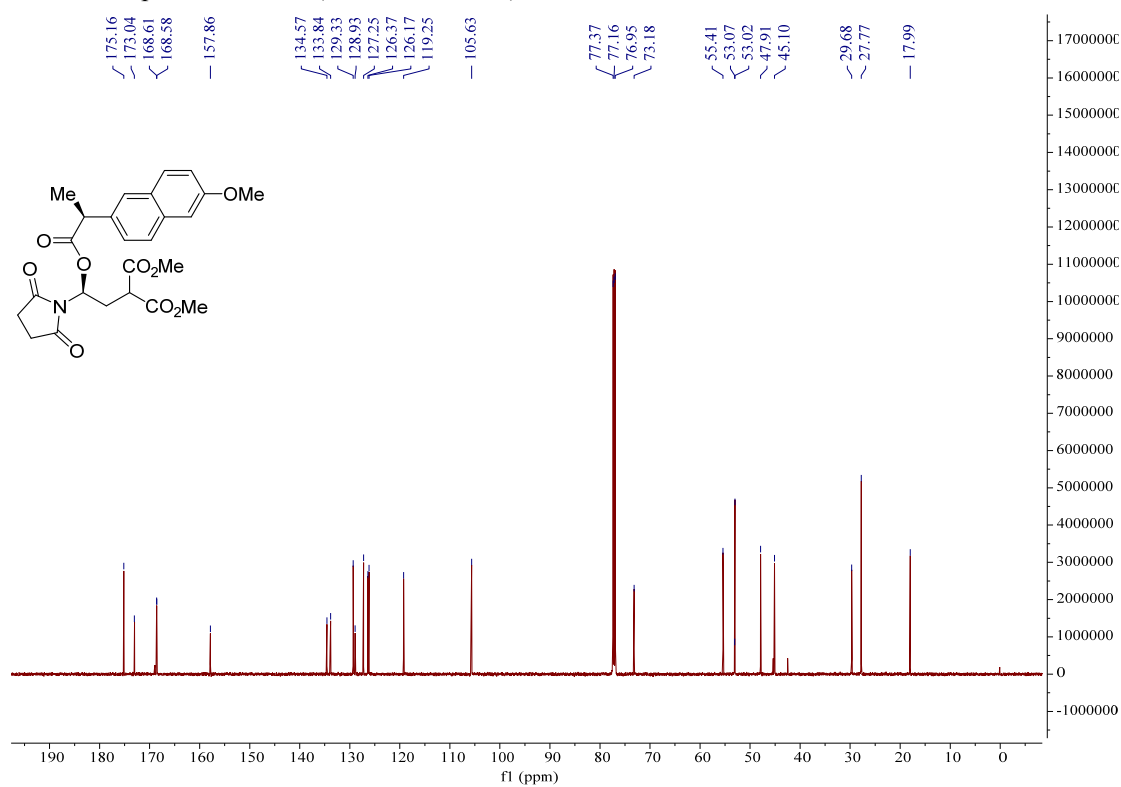

### <sup>1</sup>H NMR Spectrum of **5af** (600 MHz, CDCl<sub>3</sub>)

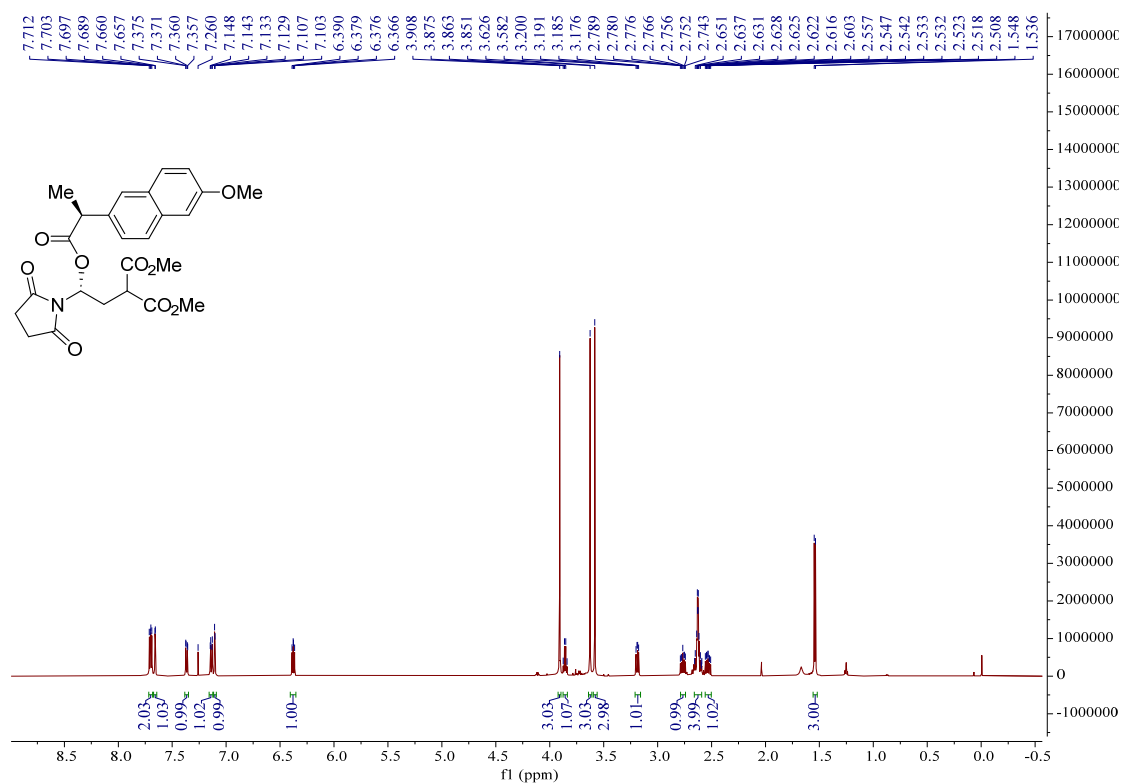

### <sup>13</sup>C NMR Spectrum of **5af** (150 MHz, CDCl<sub>3</sub>)

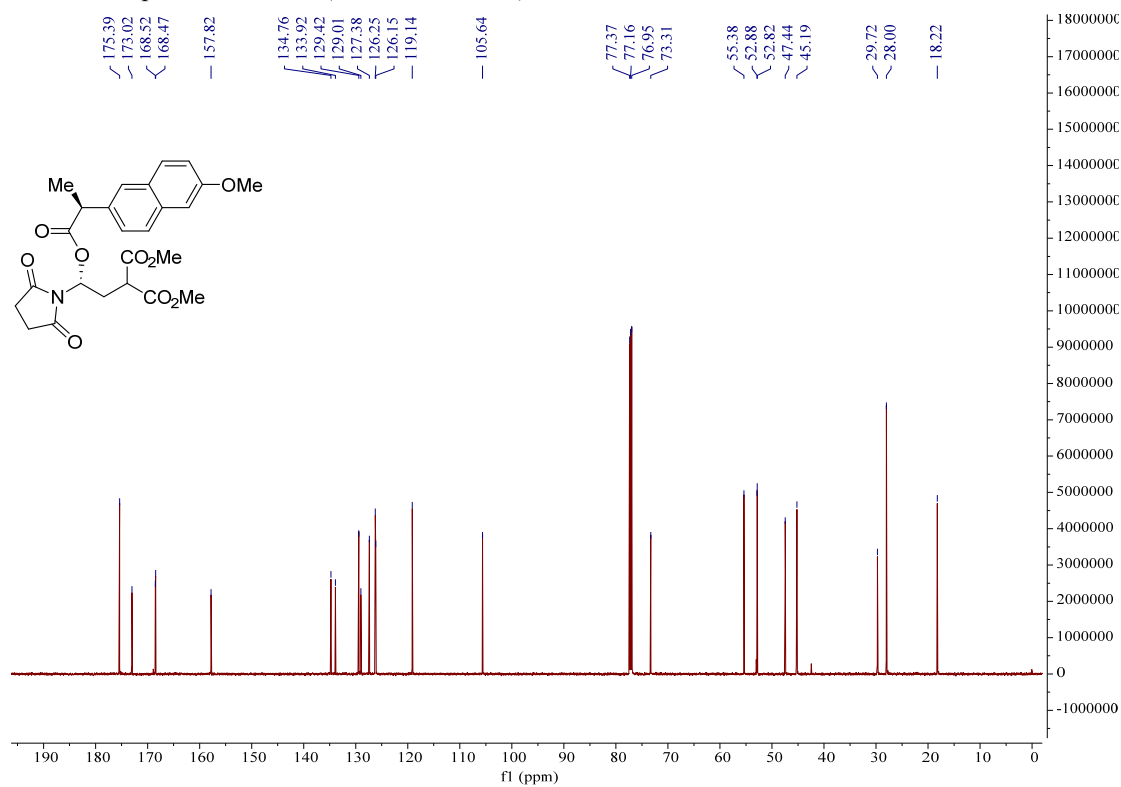

### <sup>1</sup>H NMR Spectrum of **7aa** (400 MHz, CDCl<sub>3</sub>)

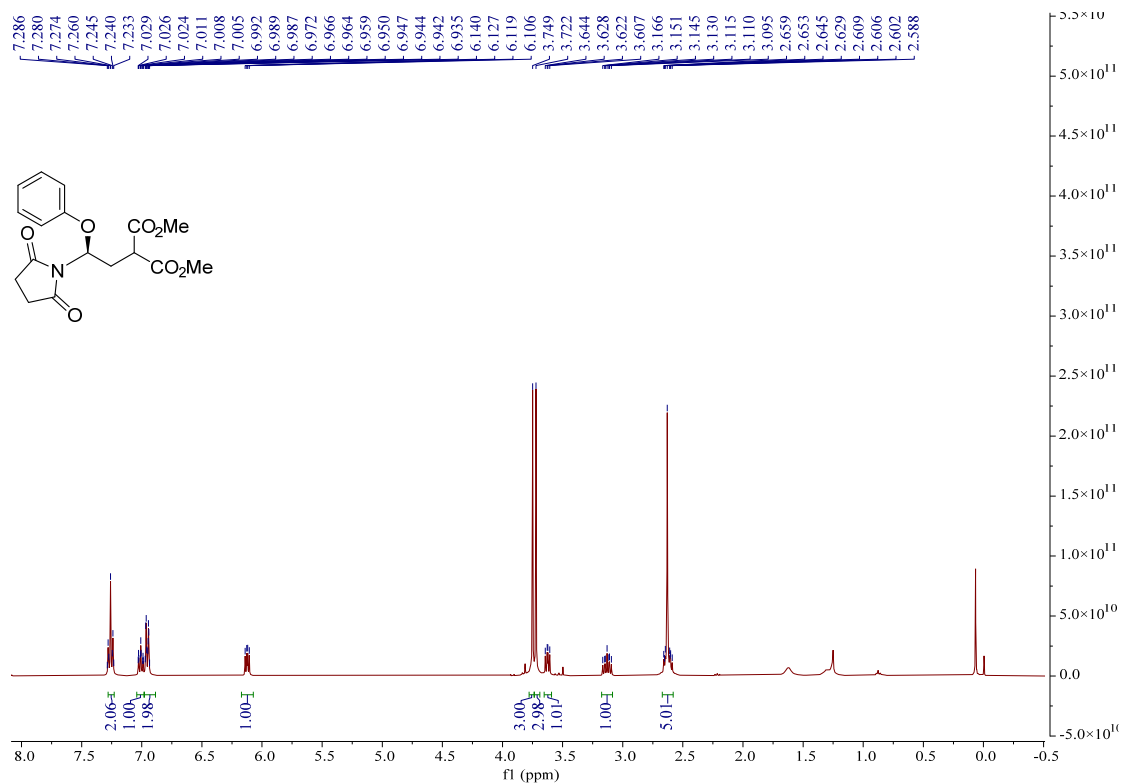

### <sup>13</sup>C NMR Spectrum of **7aa** (100 MHz, CDCl<sub>3</sub>)

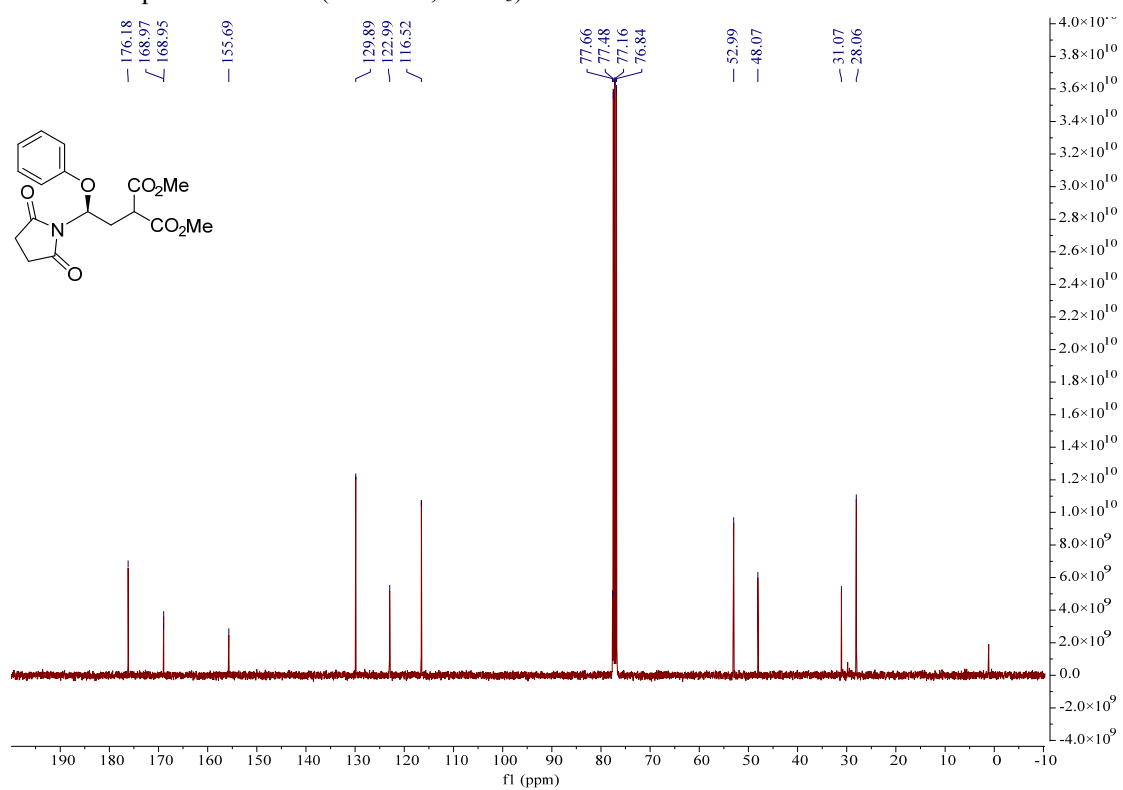

<sup>1</sup>H NMR Spectrum of **7ab** (600 MHz, CDCl<sub>3</sub>)

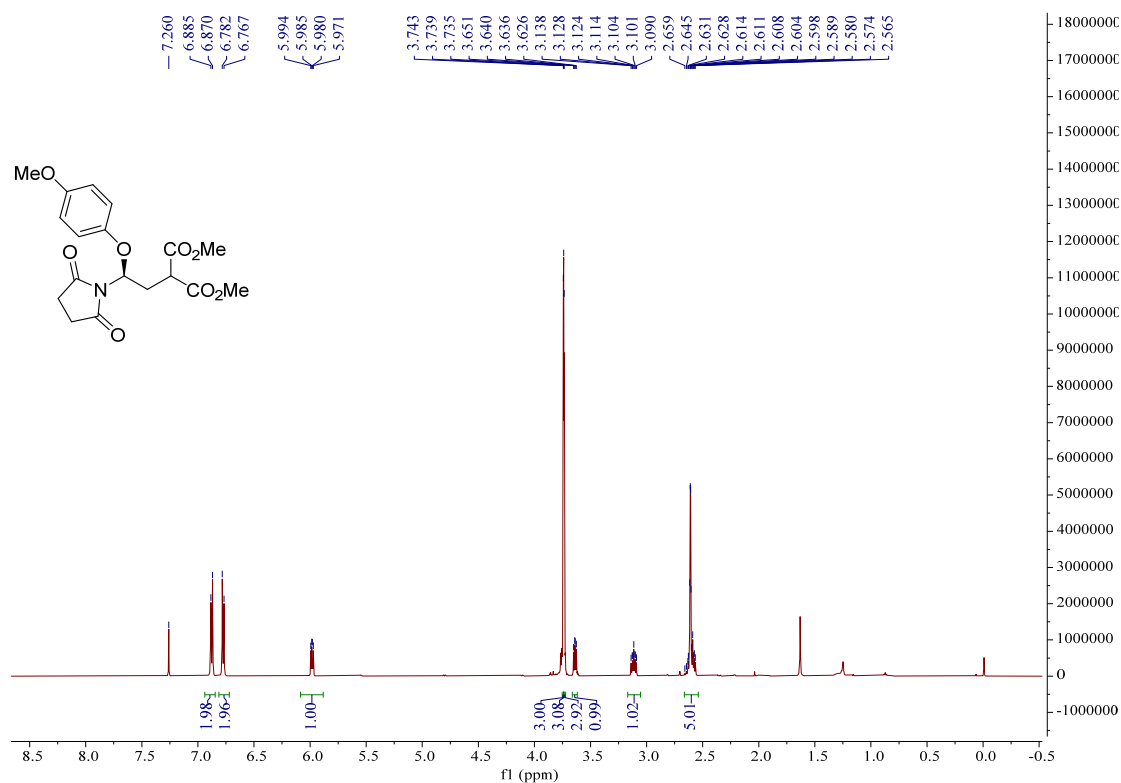

<sup>13</sup>C NMR Spectrum of **7ab** (150 MHz, CDCl<sub>3</sub>)

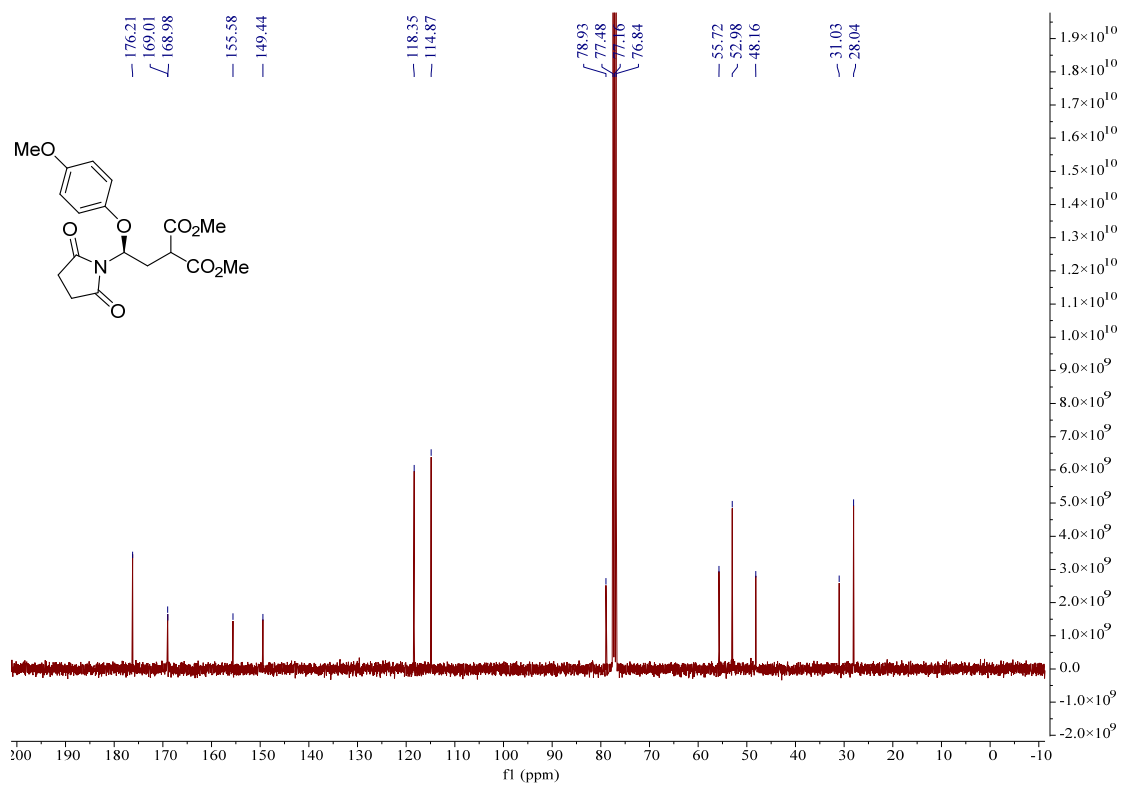

### <sup>1</sup>H NMR Spectrum of **7ac** (400 MHz, CDCl<sub>3</sub>)

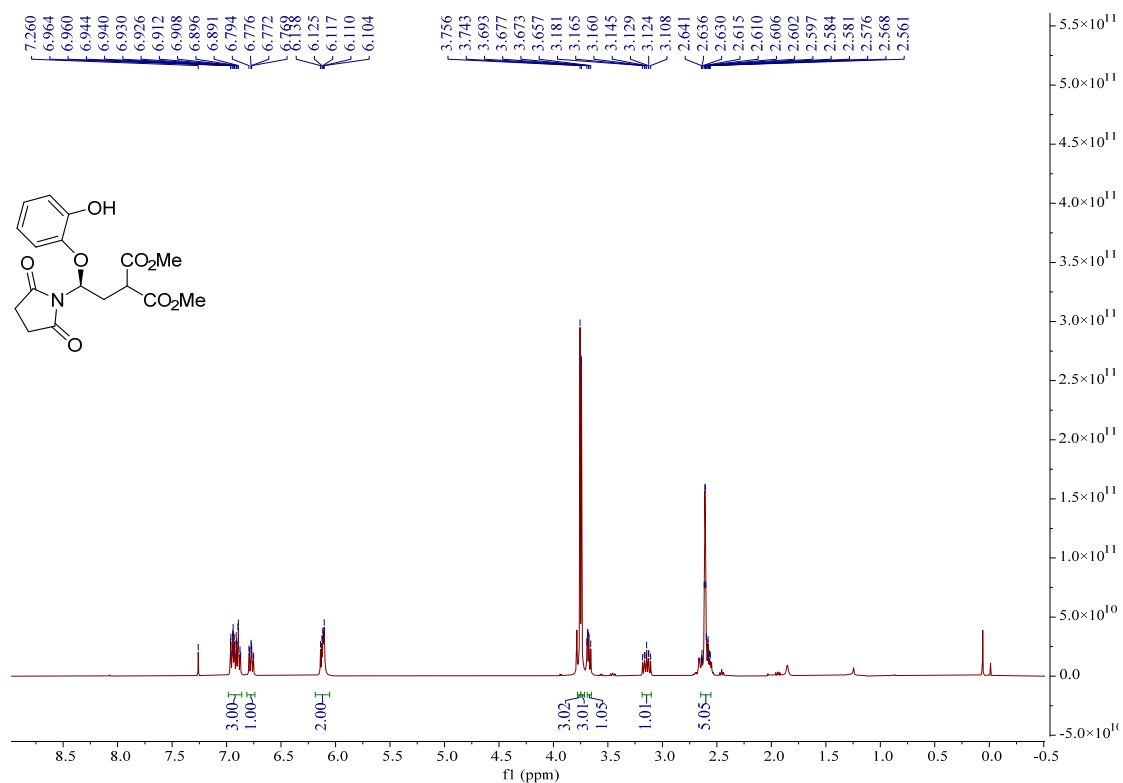

### <sup>13</sup>C NMR Spectrum of **7ac** (100 MHz, CDCl<sub>3</sub>)

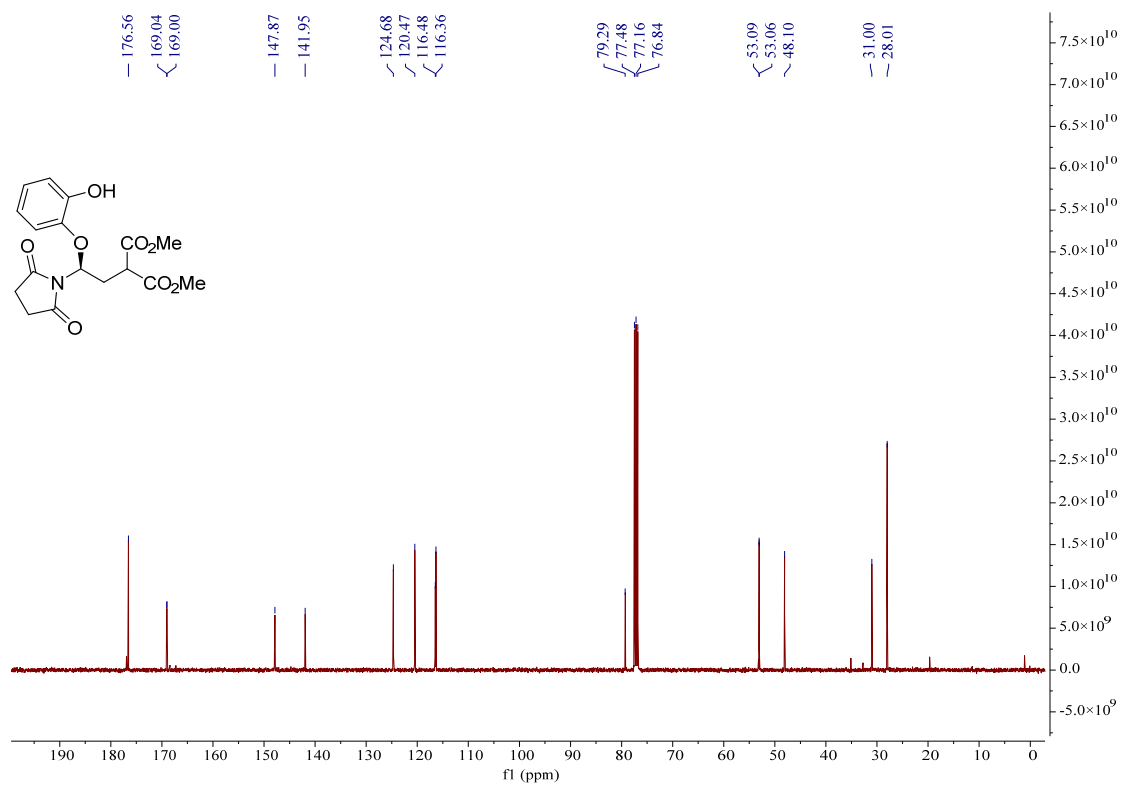

<sup>1</sup>H NMR Spectrum of **7ad** (400 MHz, CDCl<sub>3</sub>)

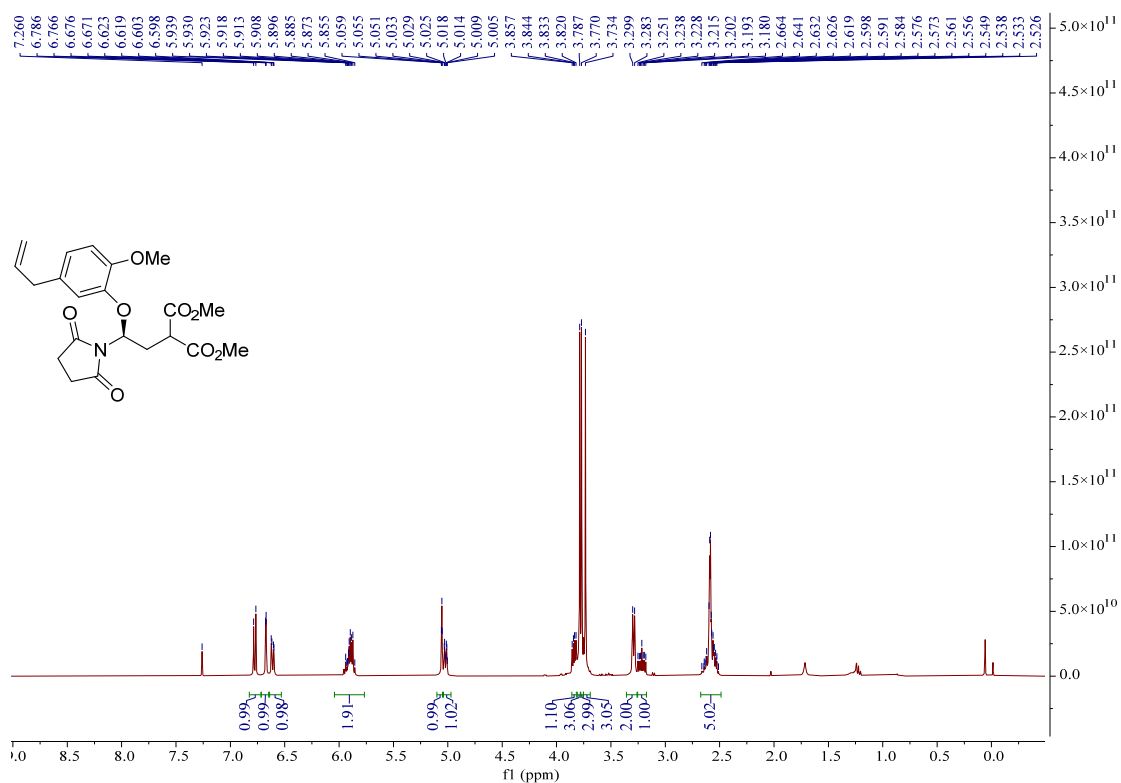

<sup>13</sup>C NMR Spectrum of **7ad** (100 MHz, CDCl<sub>3</sub>)

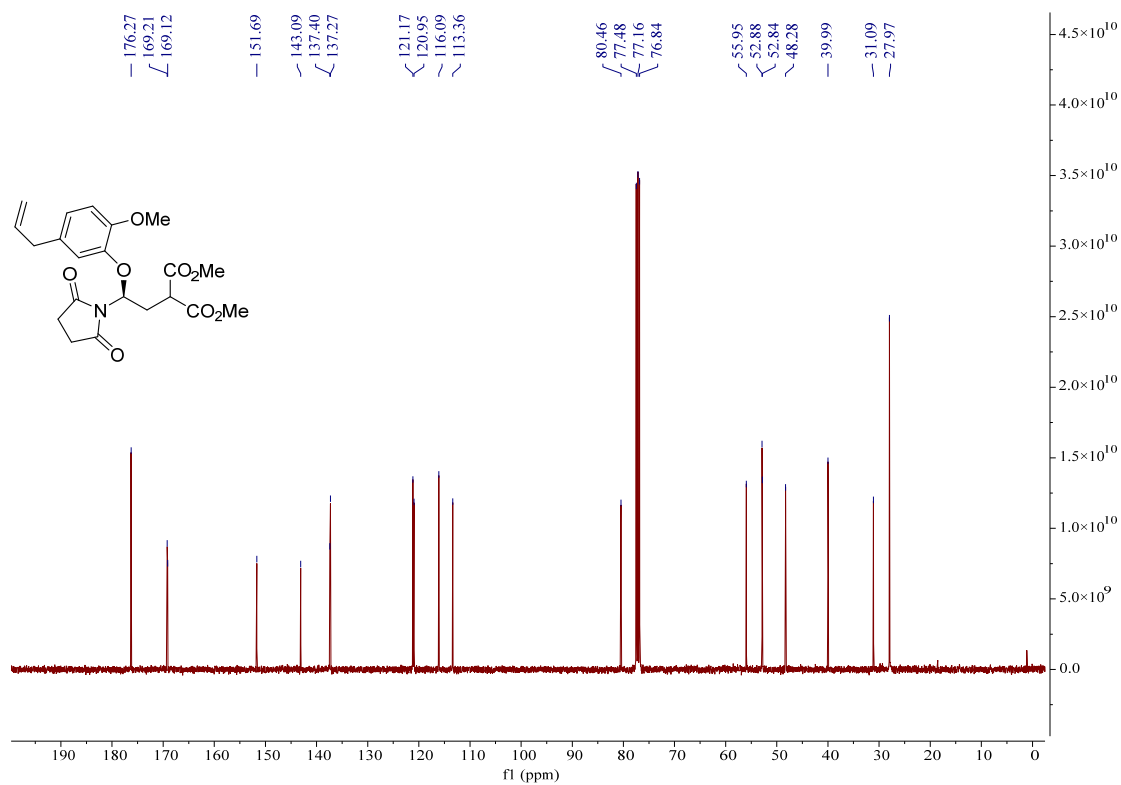

### <sup>1</sup>H NMR Spectrum of **7ae** (400 MHz, CDCl<sub>3</sub>)

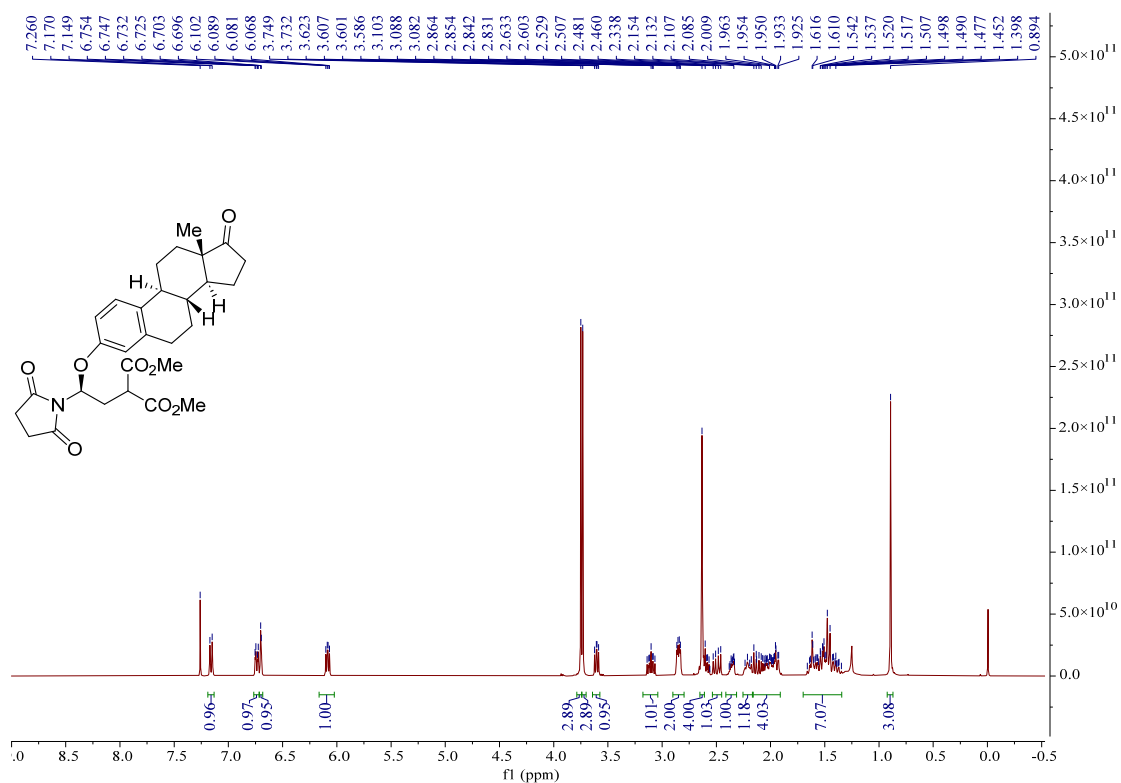

### <sup>13</sup>C NMR Spectrum of **7ae** (100 MHz, CDCl<sub>3</sub>)

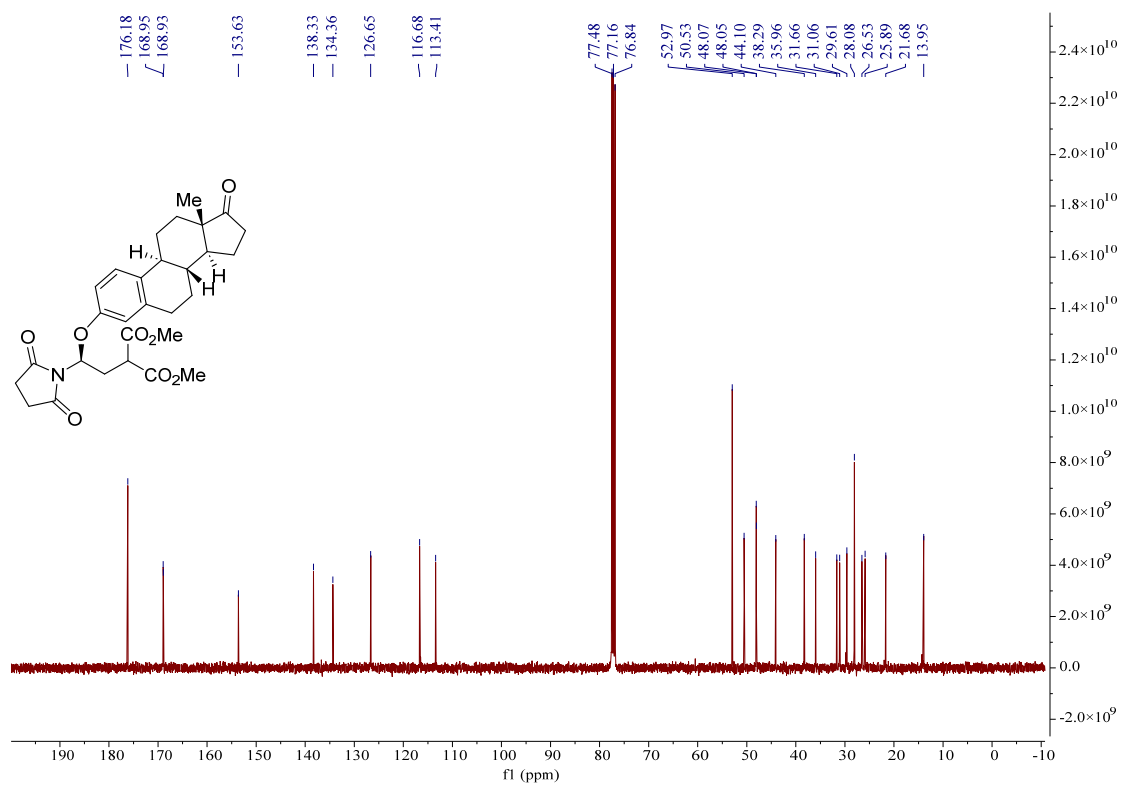

<sup>1</sup>H NMR Spectrum of **7ae'** (400 MHz, CDCl<sub>3</sub>)

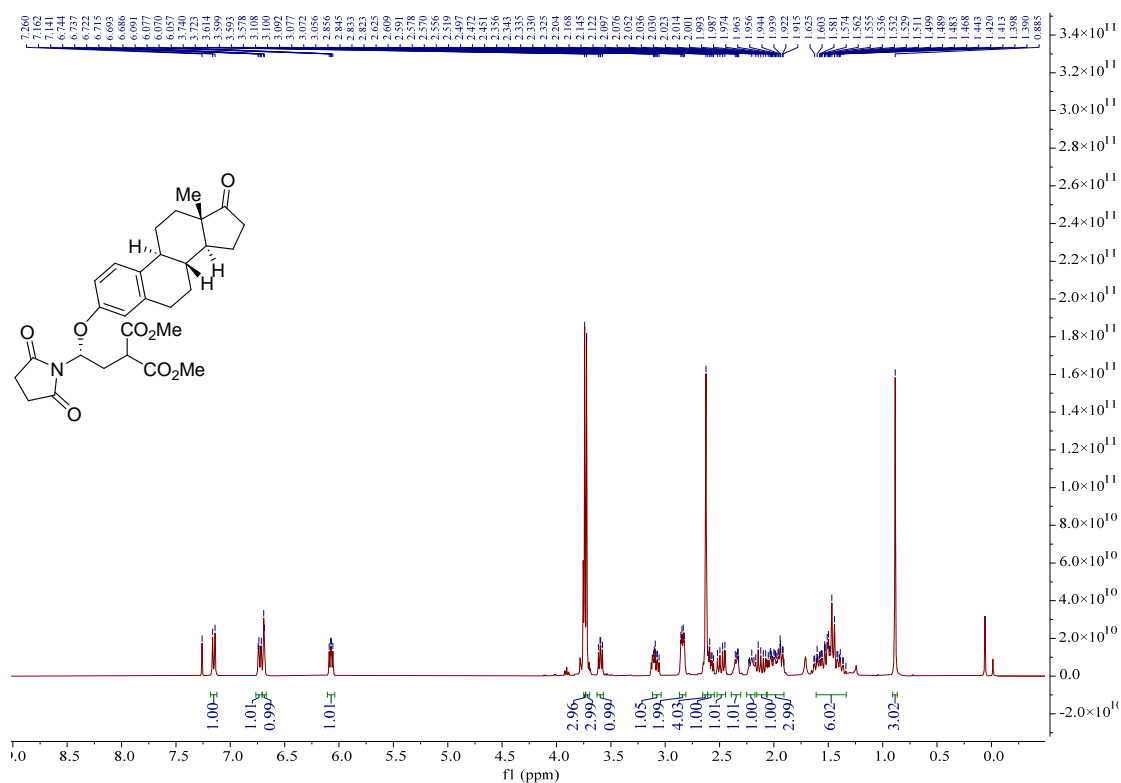

<sup>13</sup>C NMR Spectrum of **7ae'** (100 MHz, CDCl<sub>3</sub>)

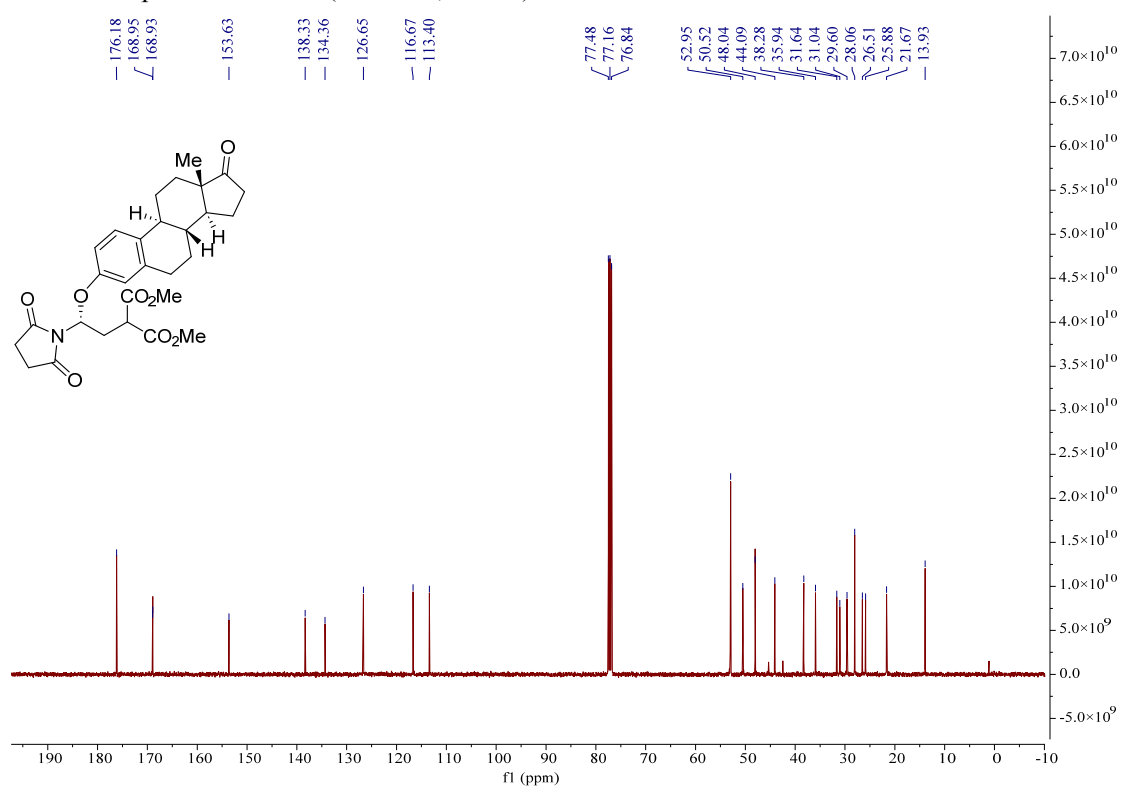



### <sup>1</sup>H NMR Spectrum of **9aa** (400 MHz, CDCl<sub>3</sub>)

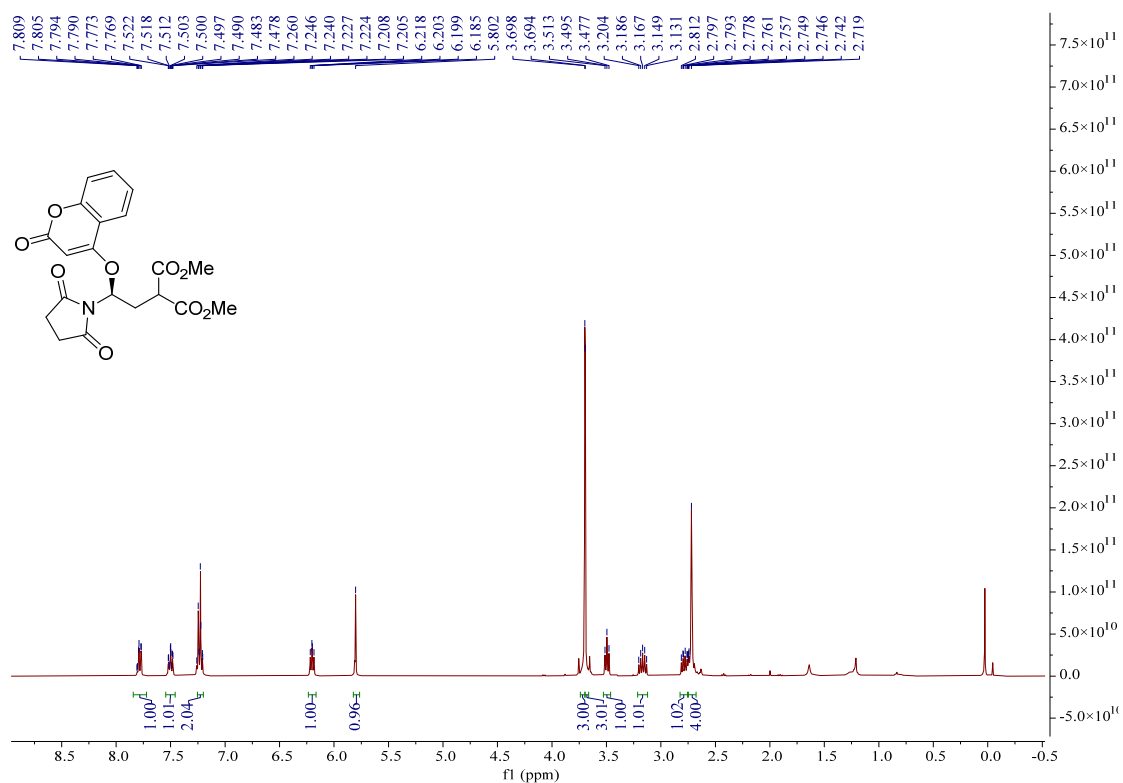

### <sup>13</sup>C NMR Spectrum of **9aa** (100 MHz, CDCl<sub>3</sub>)

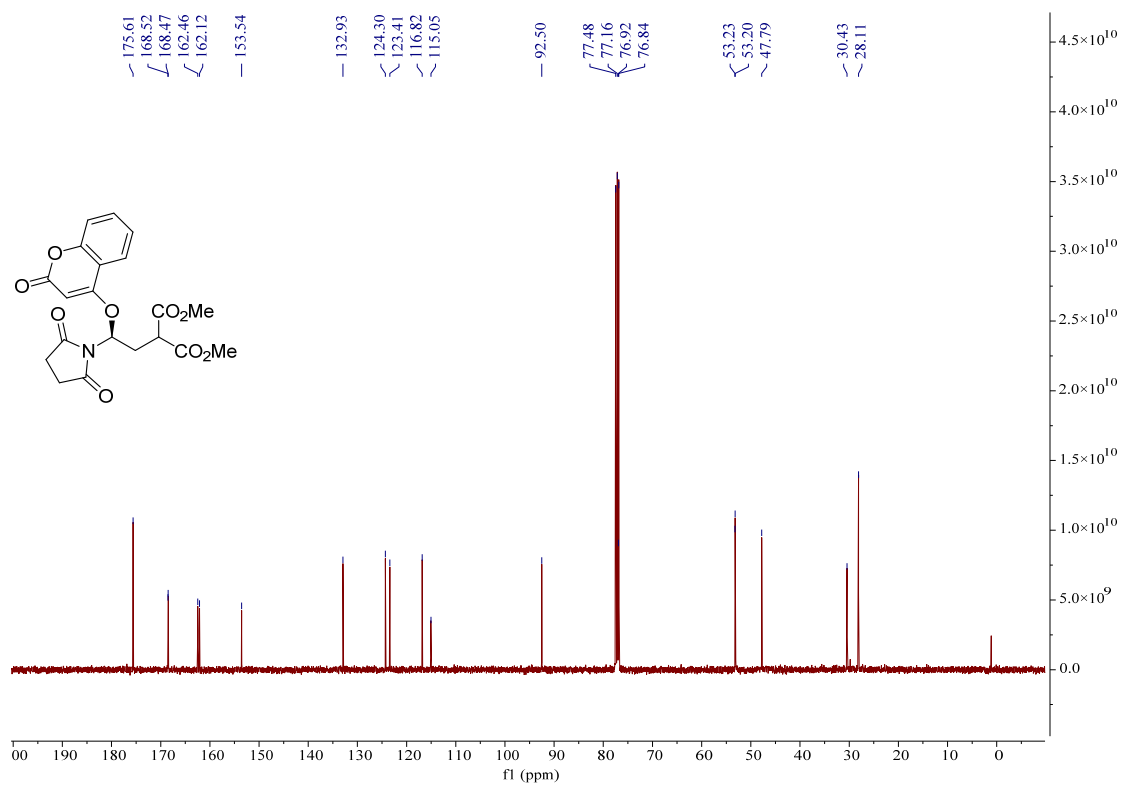

<sup>1</sup>H NMR Spectrum of **9ab** (600 MHz, CDCl<sub>3</sub>)

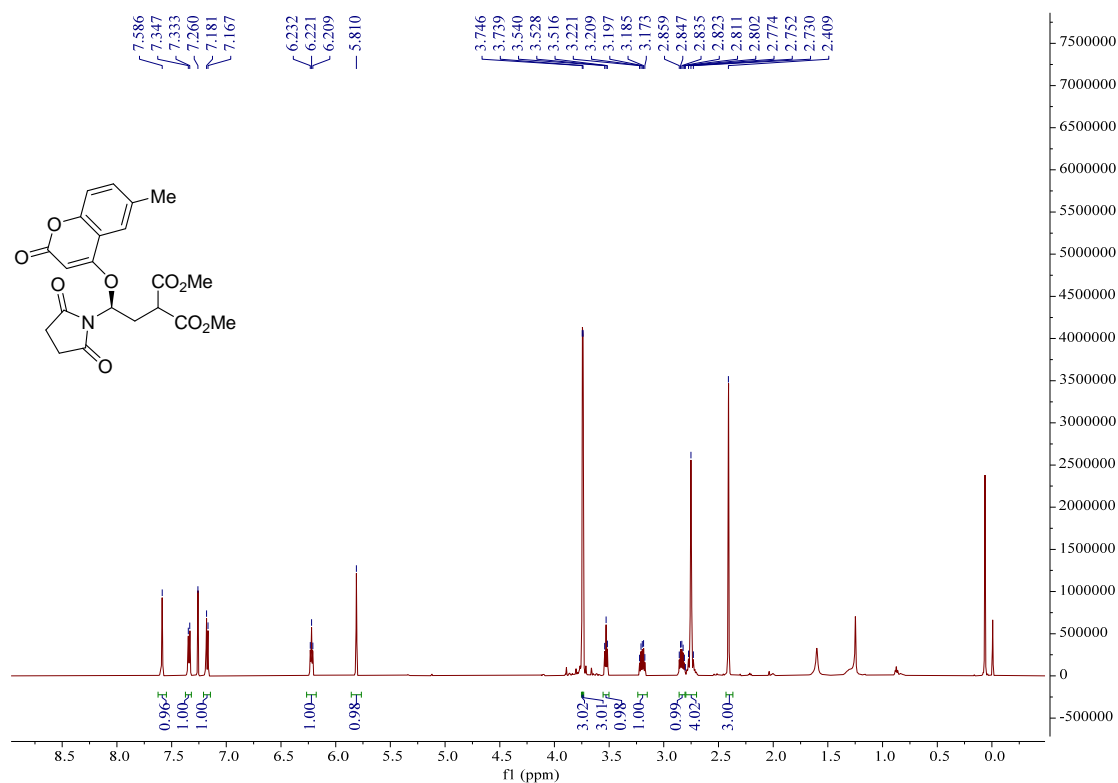

<sup>13</sup>C NMR Spectrum of **9ab** (150 MHz, CDCl<sub>3</sub>)

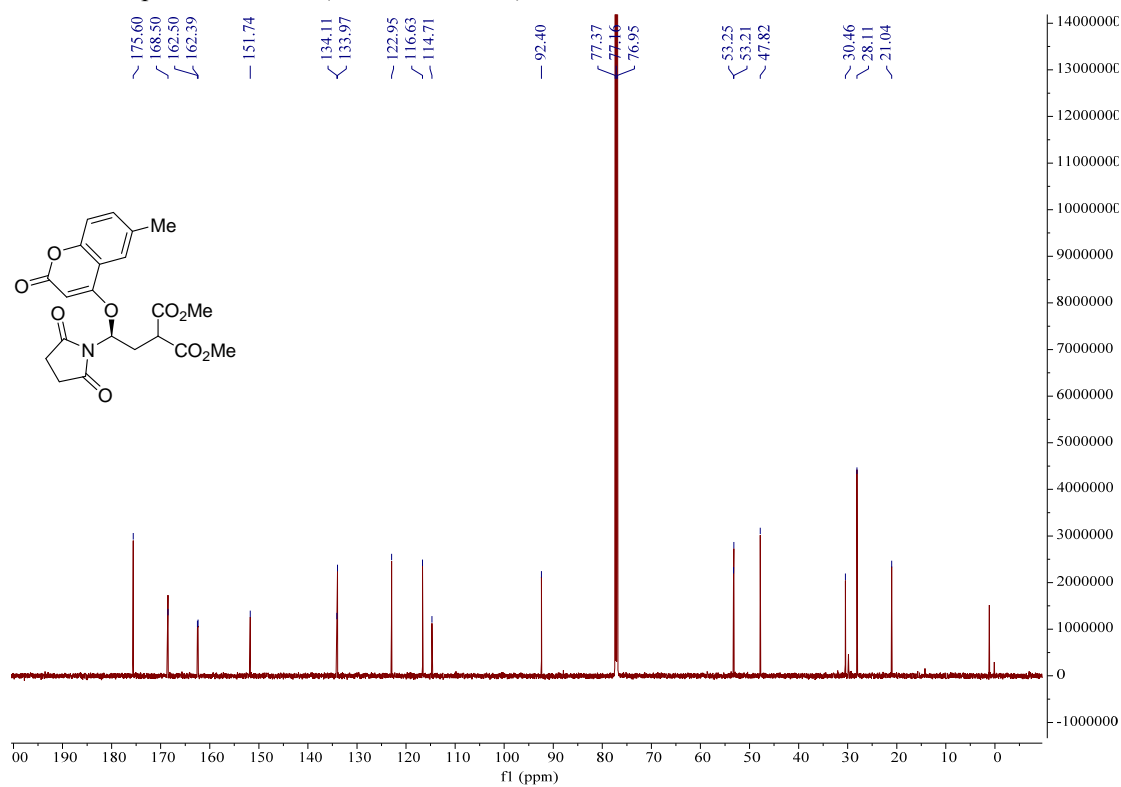

<sup>1</sup>H NMR Spectrum of **9ac** (600 MHz, CDCl<sub>3</sub>)

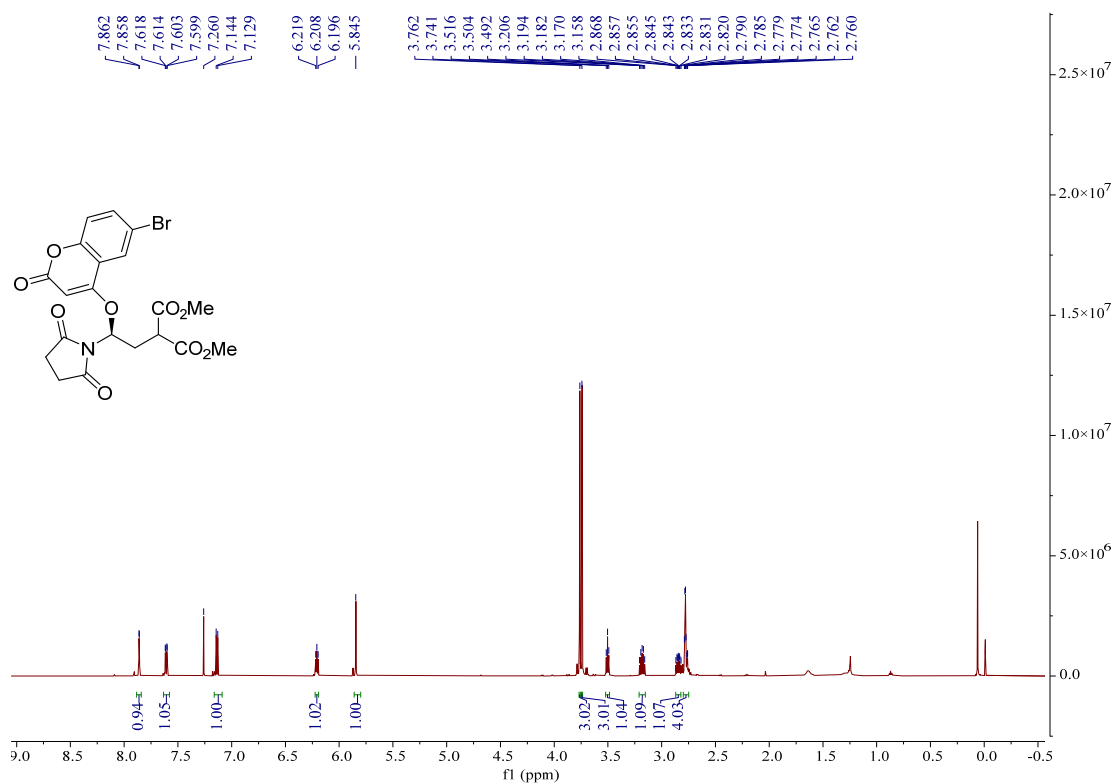

<sup>13</sup>C NMR Spectrum of **9ac** (150 MHz, CDCl<sub>3</sub>)

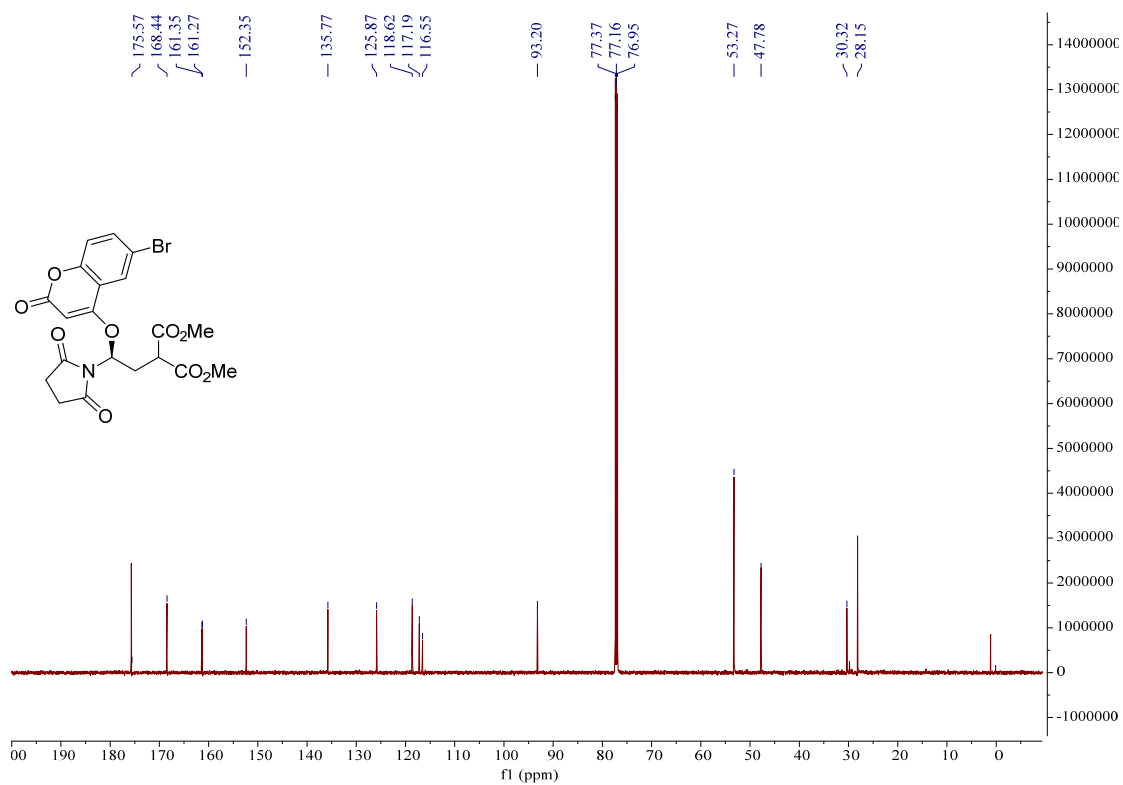

<sup>1</sup>H NMR Spectrum of **11aa** (600 MHz, CDCl<sub>3</sub>)

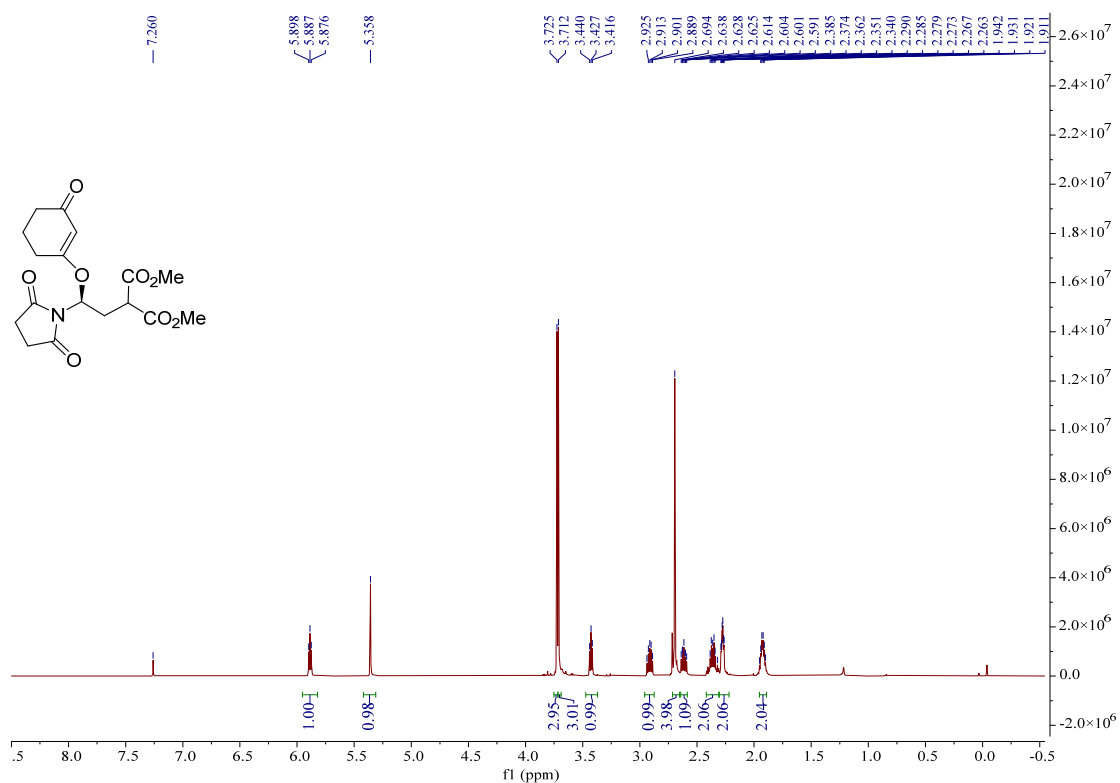

<sup>13</sup>C NMR Spectrum of **11aa** (150 MHz, CDCl<sub>3</sub>)

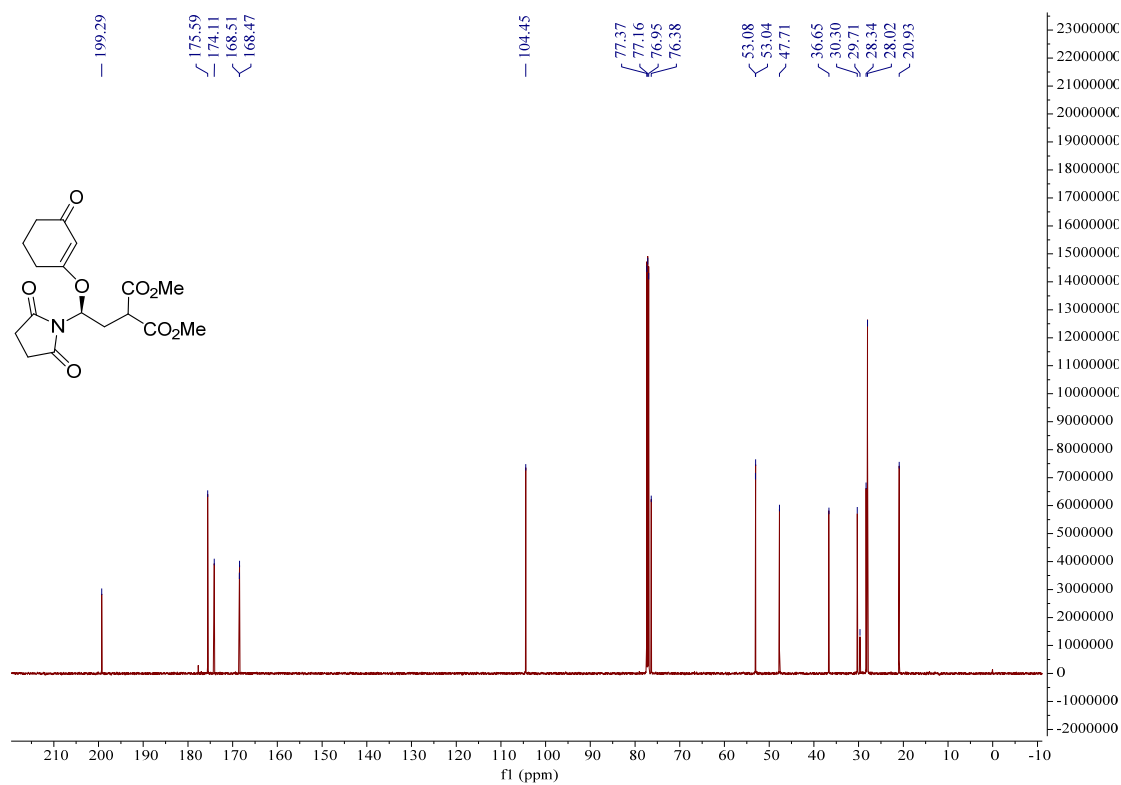

<sup>1</sup>H NMR Spectrum of **11ab** (400 MHz, CDCl<sub>3</sub>)

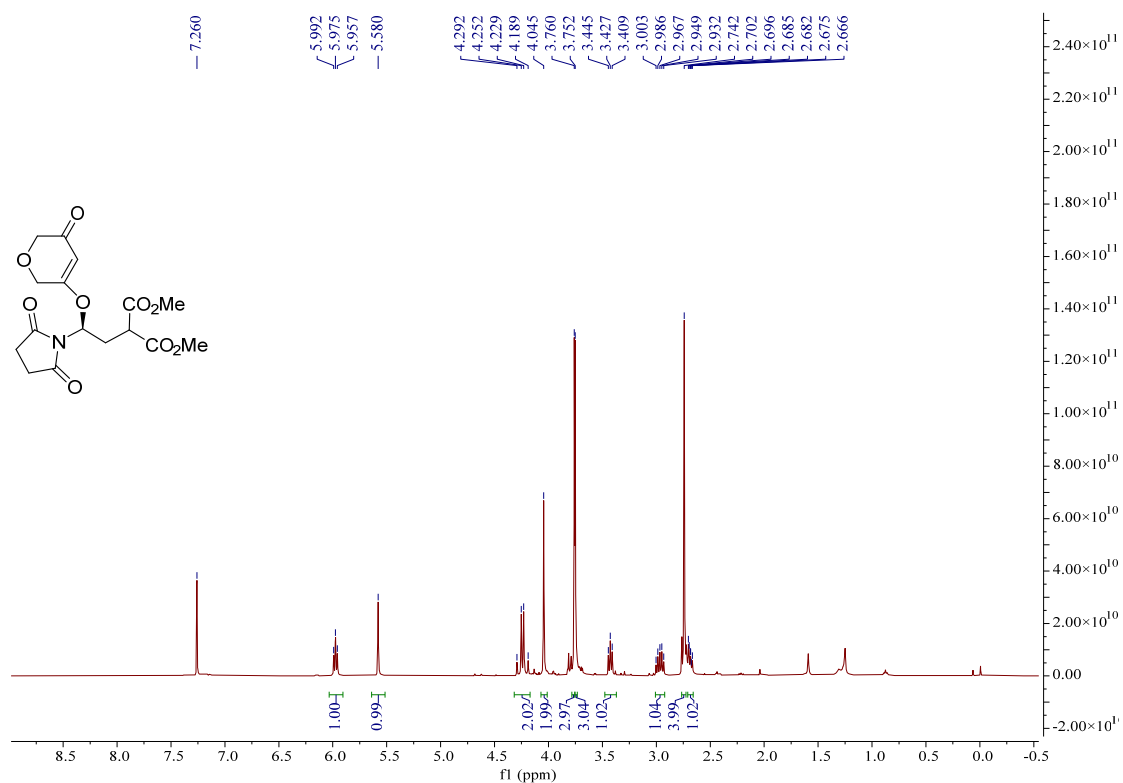

<sup>13</sup>C NMR Spectrum of **11ab** (100 MHz, CDCl<sub>3</sub>)

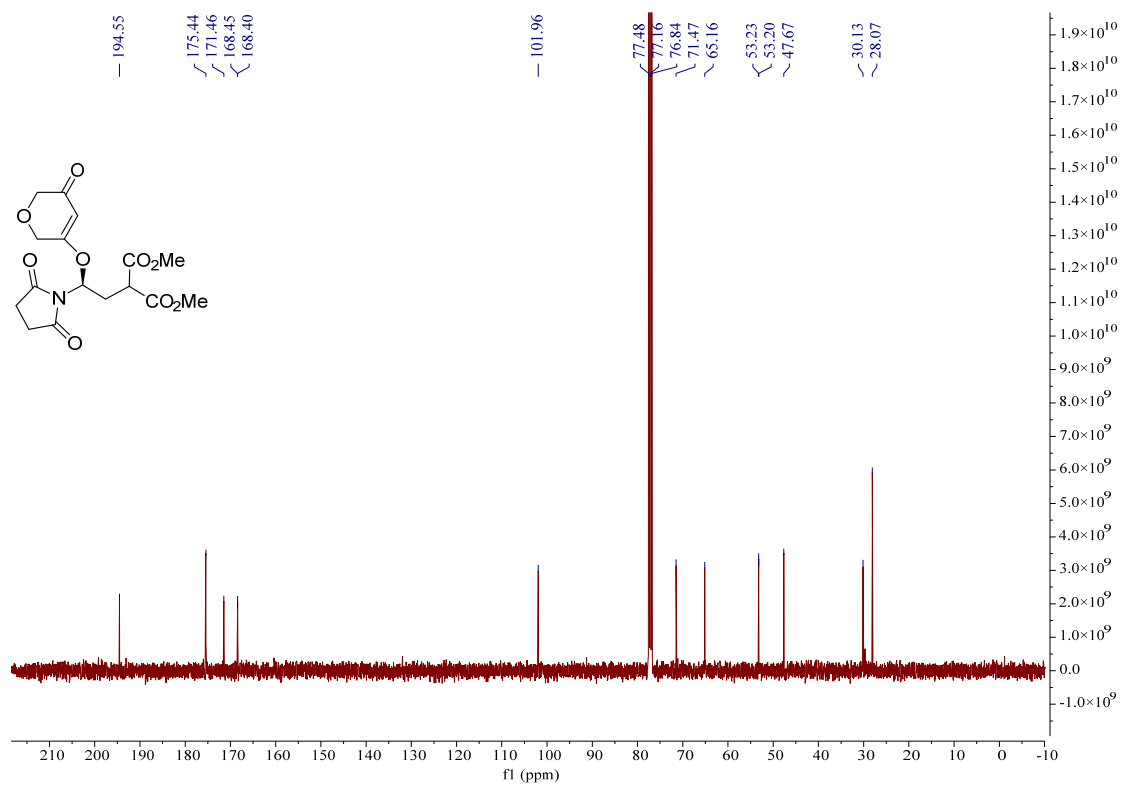

<sup>1</sup>H NMR Spectrum of **11ac** (600 MHz, CDCl<sub>3</sub>)

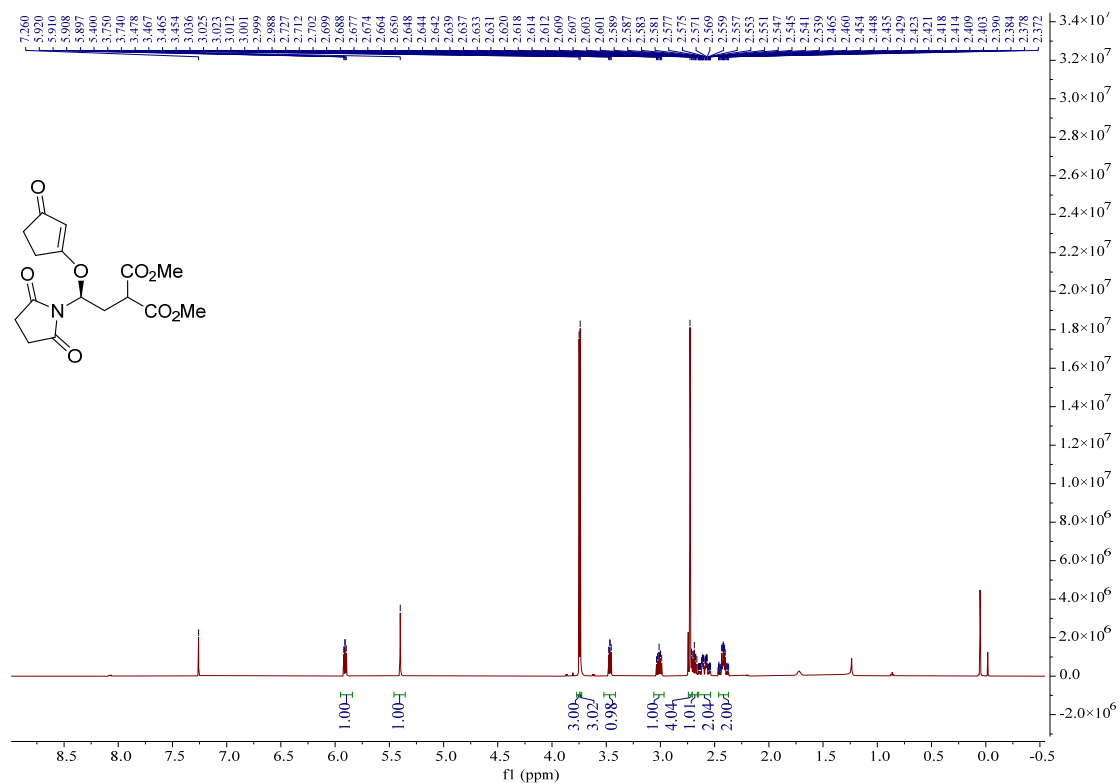

<sup>13</sup>C NMR Spectrum of **11ac** (150 MHz, CDCl<sub>3</sub>)

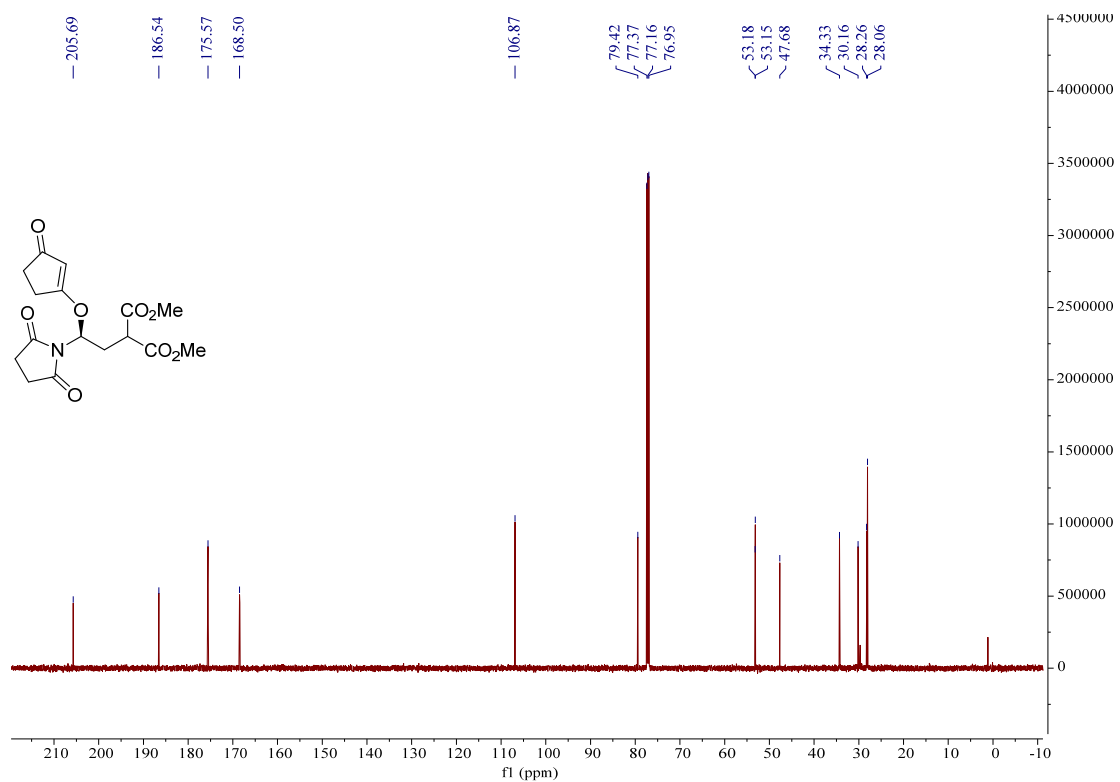

### <sup>1</sup>H NMR Spectrum of **12aa** (400 MHz, CDCl<sub>3</sub>)

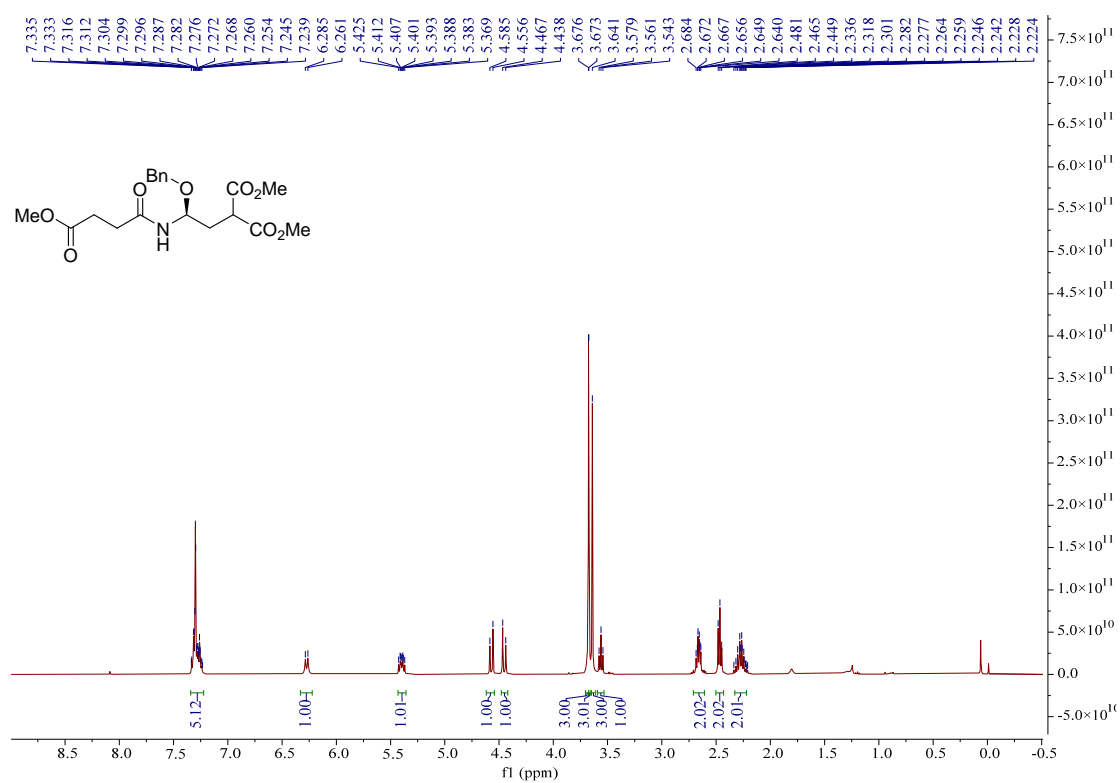

### <sup>13</sup>C NMR Spectrum of **12aa** (100 MHz, CDCl<sub>3</sub>)

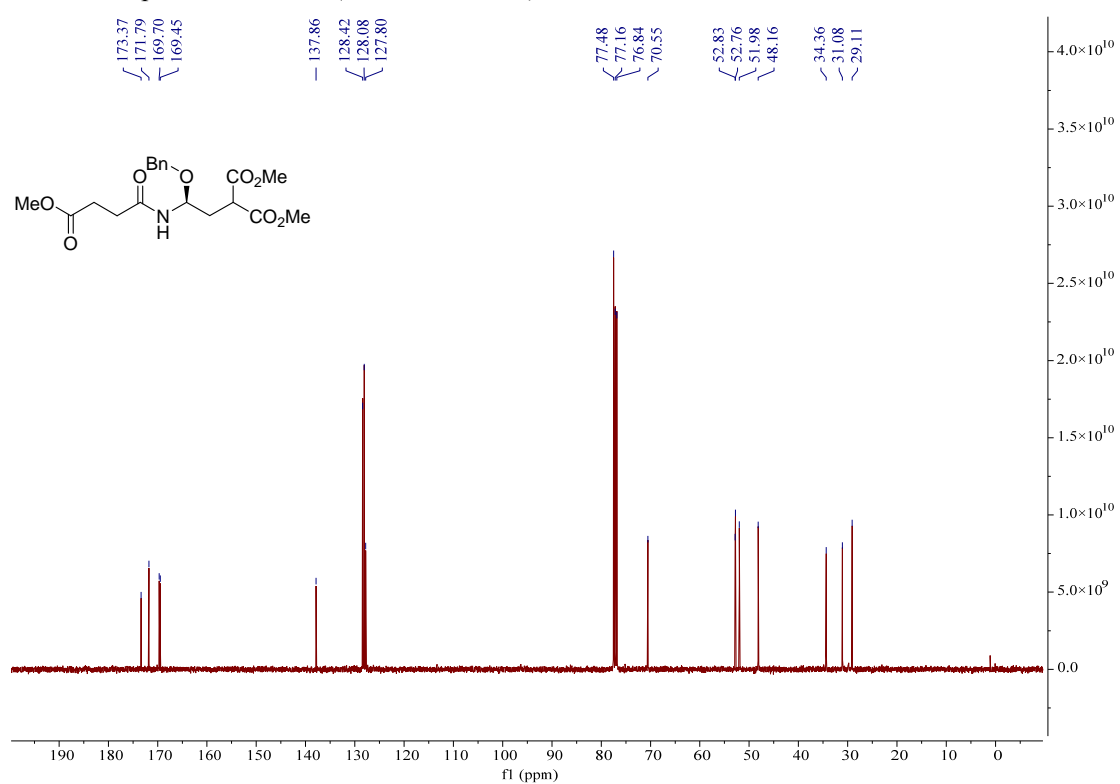

<sup>1</sup>H NMR Spectrum of **13aa** (600 MHz, CDCl<sub>3</sub>)

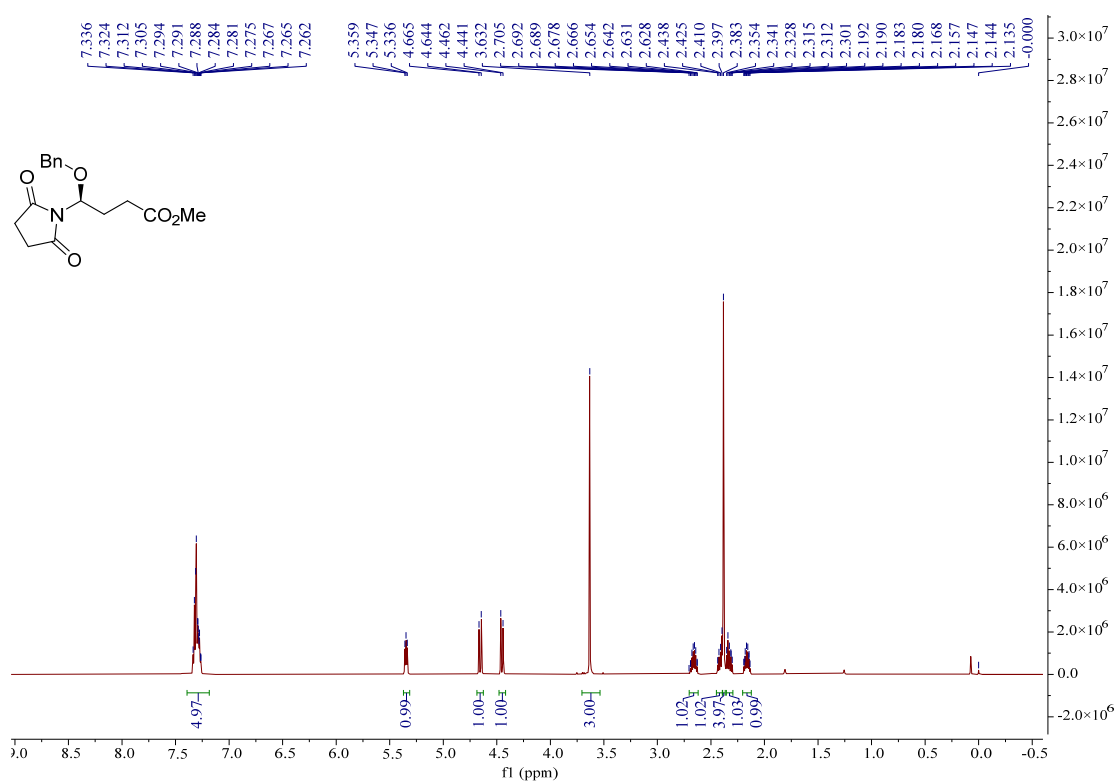

<sup>13</sup>C NMR Spectrum of **13aa** (150 MHz, CDCl<sub>3</sub>)

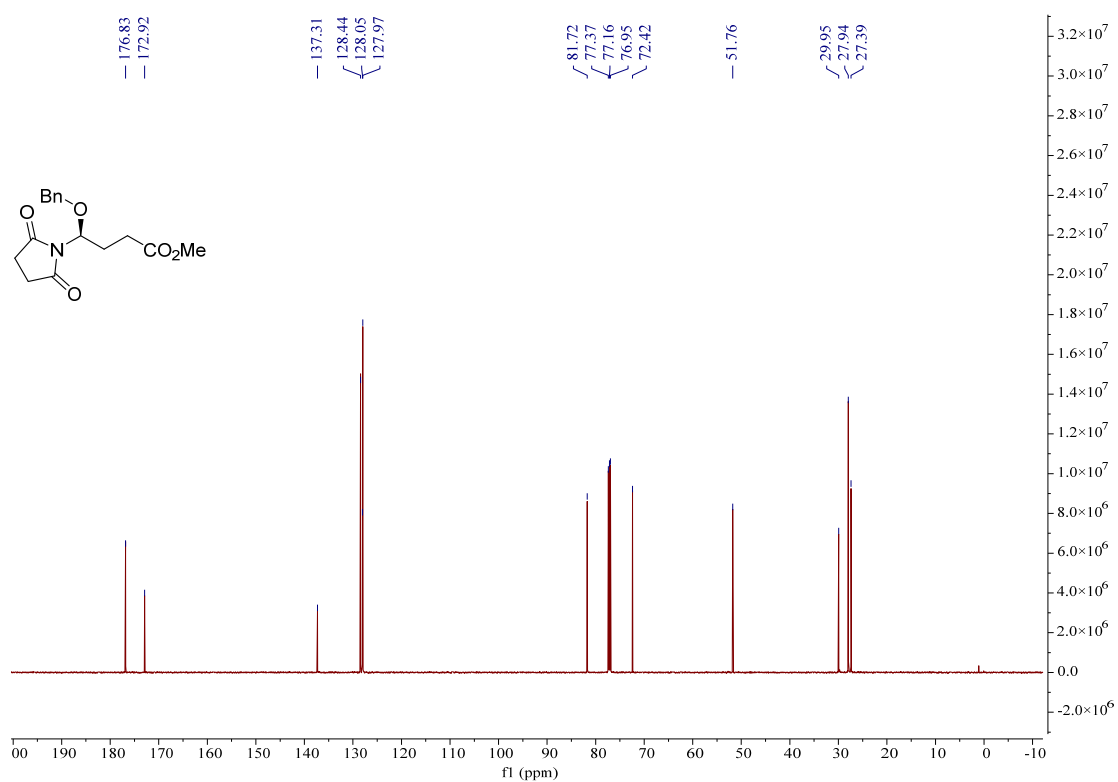



<sup>1</sup>H NMR Spectrum of **14aa** (400 MHz, CDCl<sub>3</sub>)

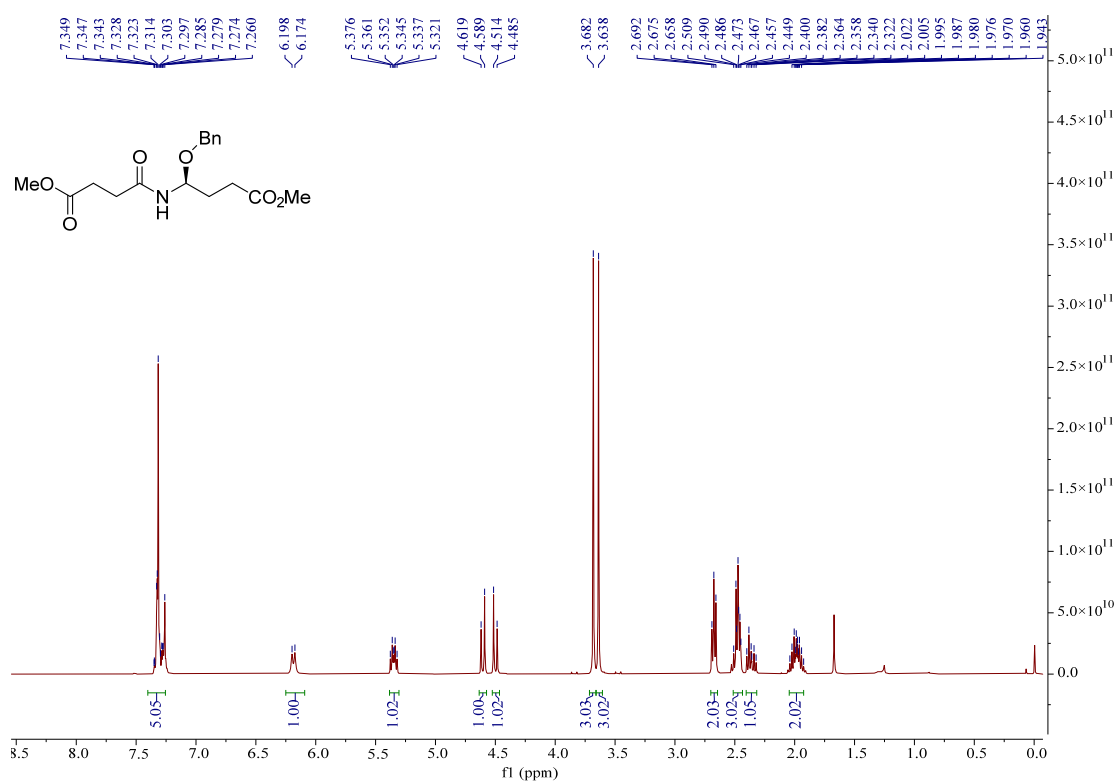

<sup>13</sup>C NMR Spectrum of **14aa** (100 MHz, CDCl<sub>3</sub>)

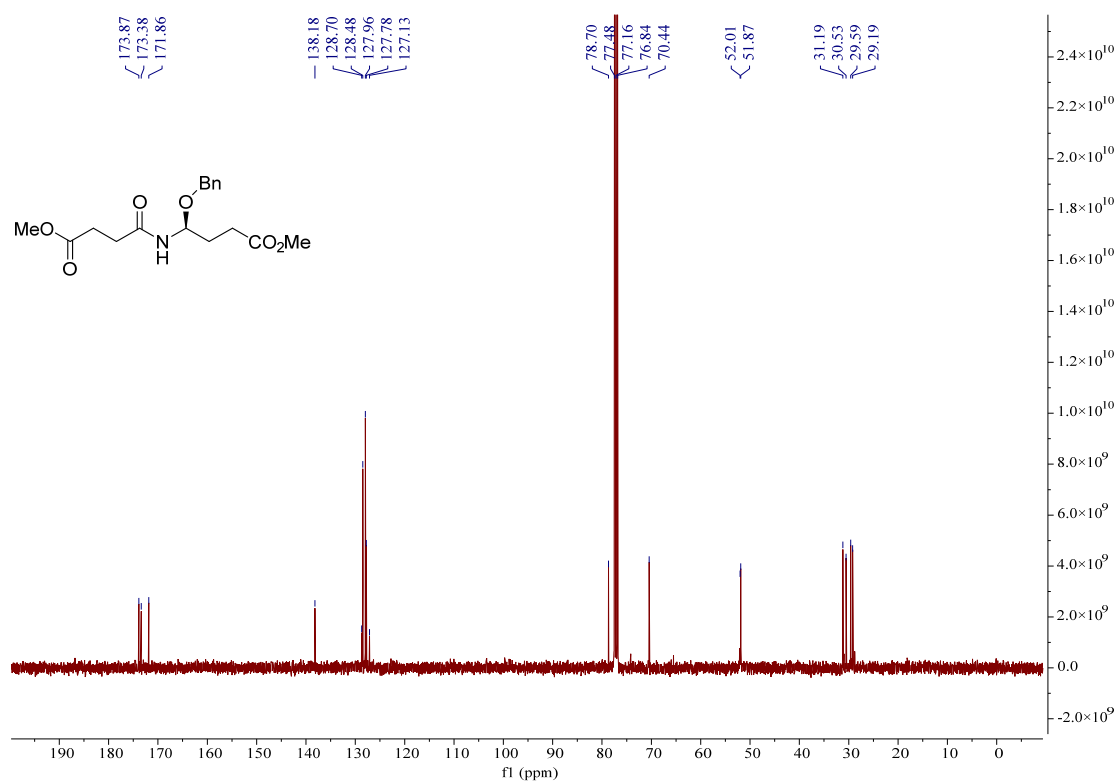

<sup>1</sup>H NMR Spectrum of **15aa** (400 MHz, CDCl<sub>3</sub>)

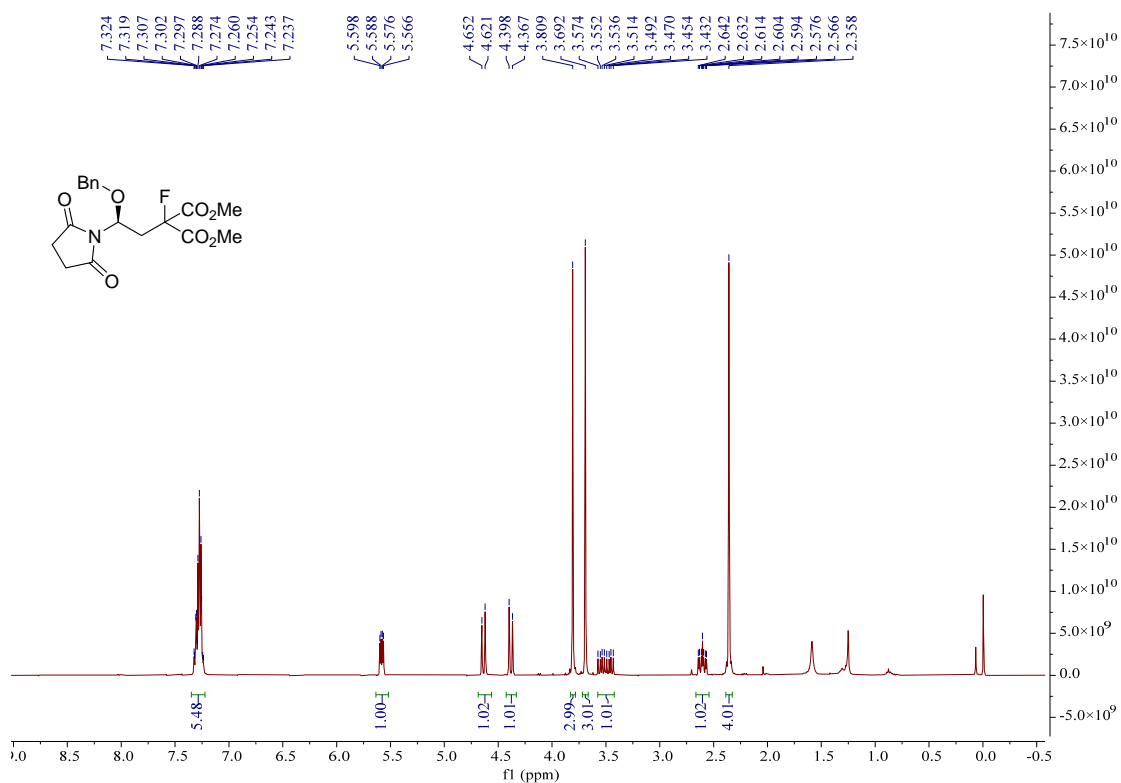

<sup>13</sup>C NMR Spectrum of **15aa** (100 MHz, CDCl<sub>3</sub>)

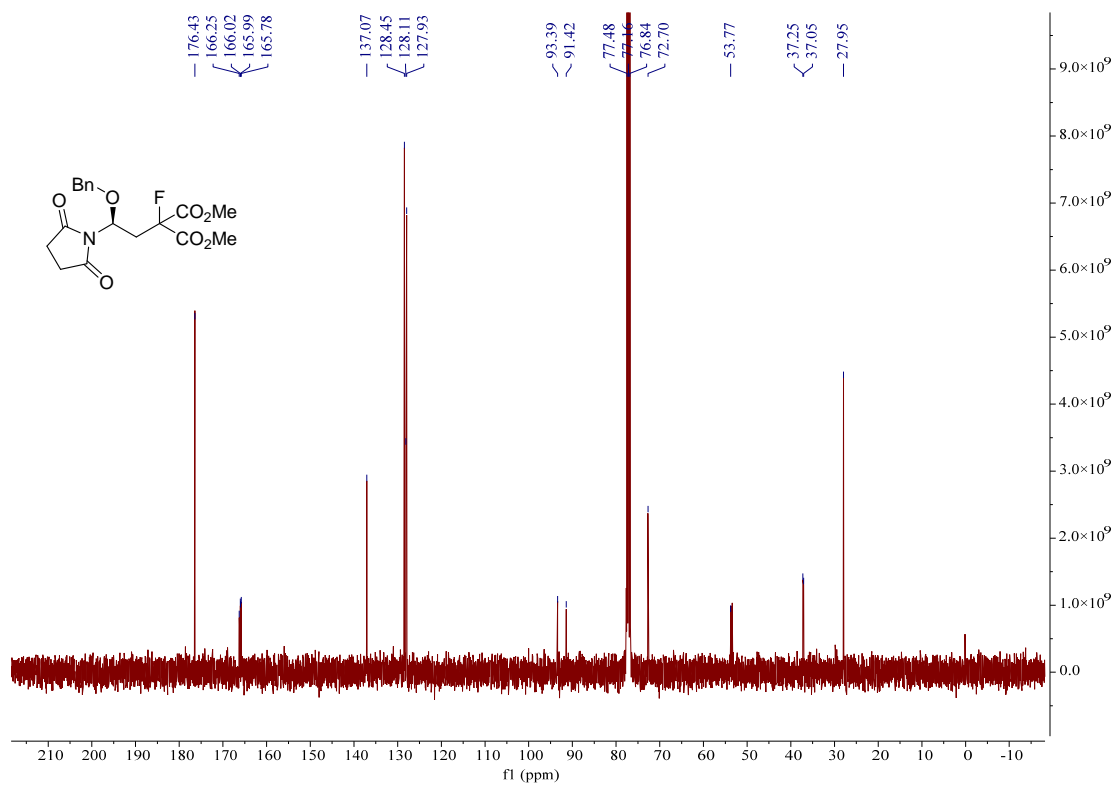

<sup>9</sup>F NMR Spectrum of **15aa** (376 MHz, CDCl<sub>3</sub>)

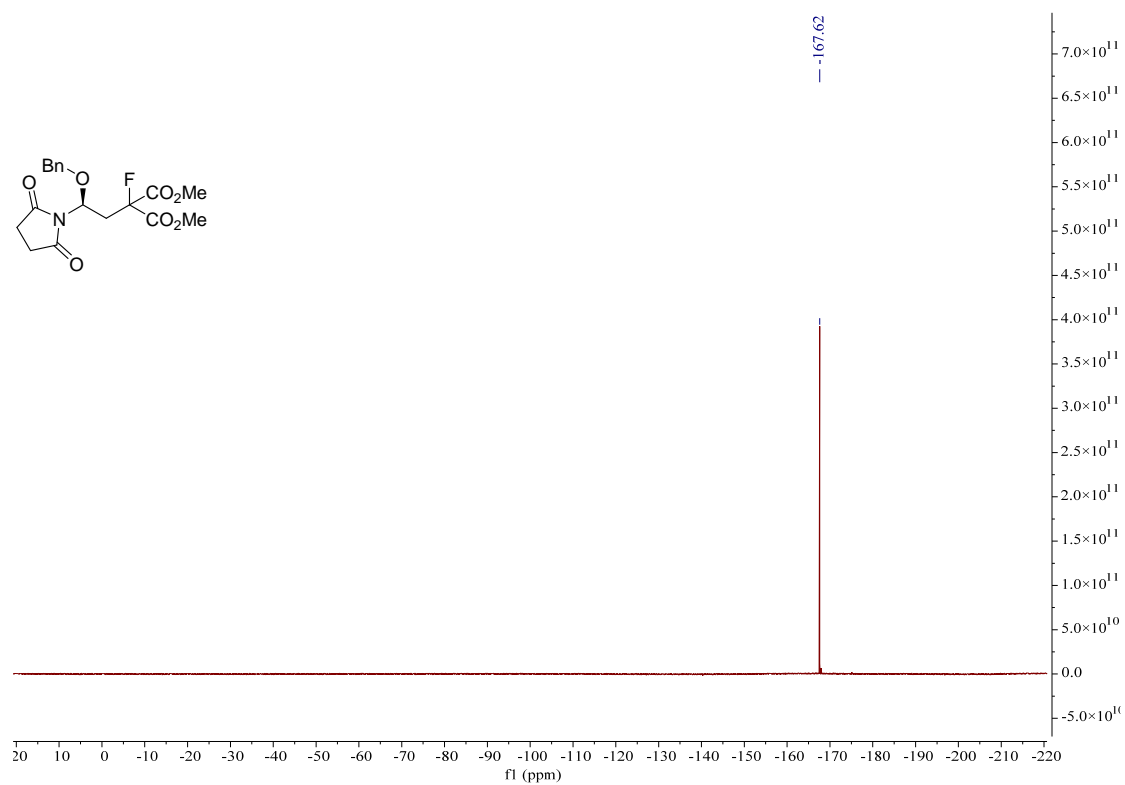

<sup>1</sup>H NMR Spectrum of **16aa** (600 MHz, CDCl<sub>3</sub>)

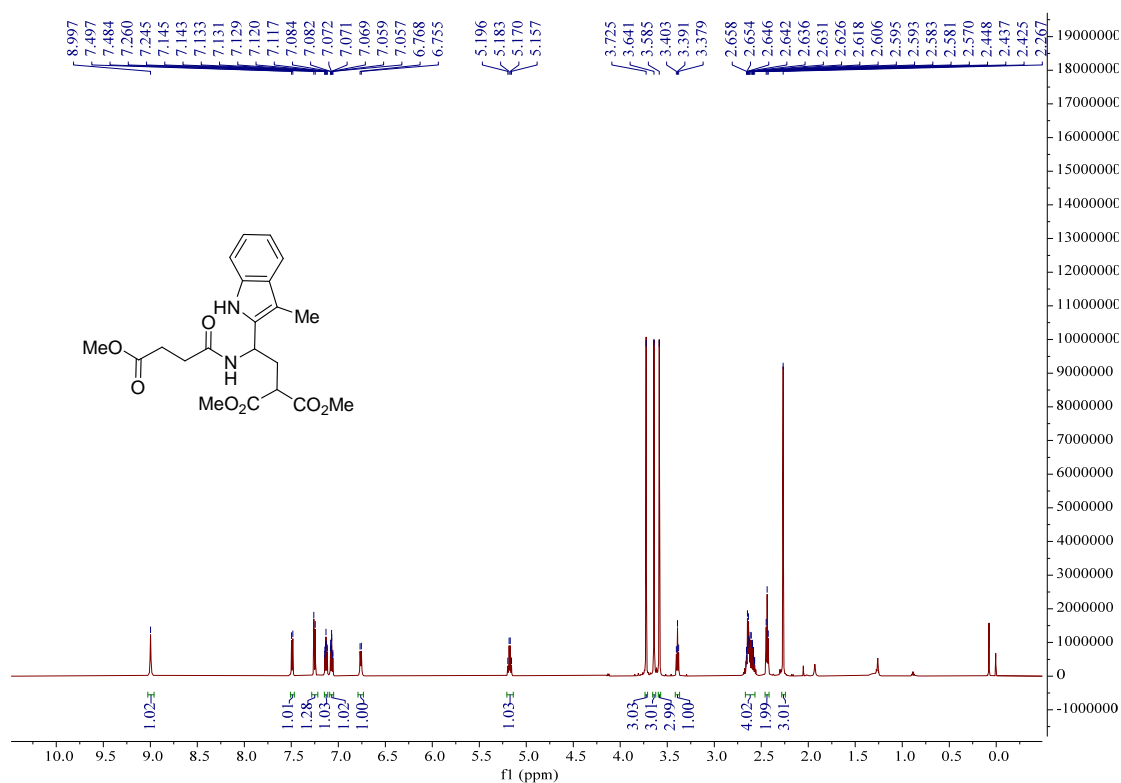

<sup>13</sup>C NMR Spectrum of **16aa** (150 MHz, CDCl<sub>3</sub>)

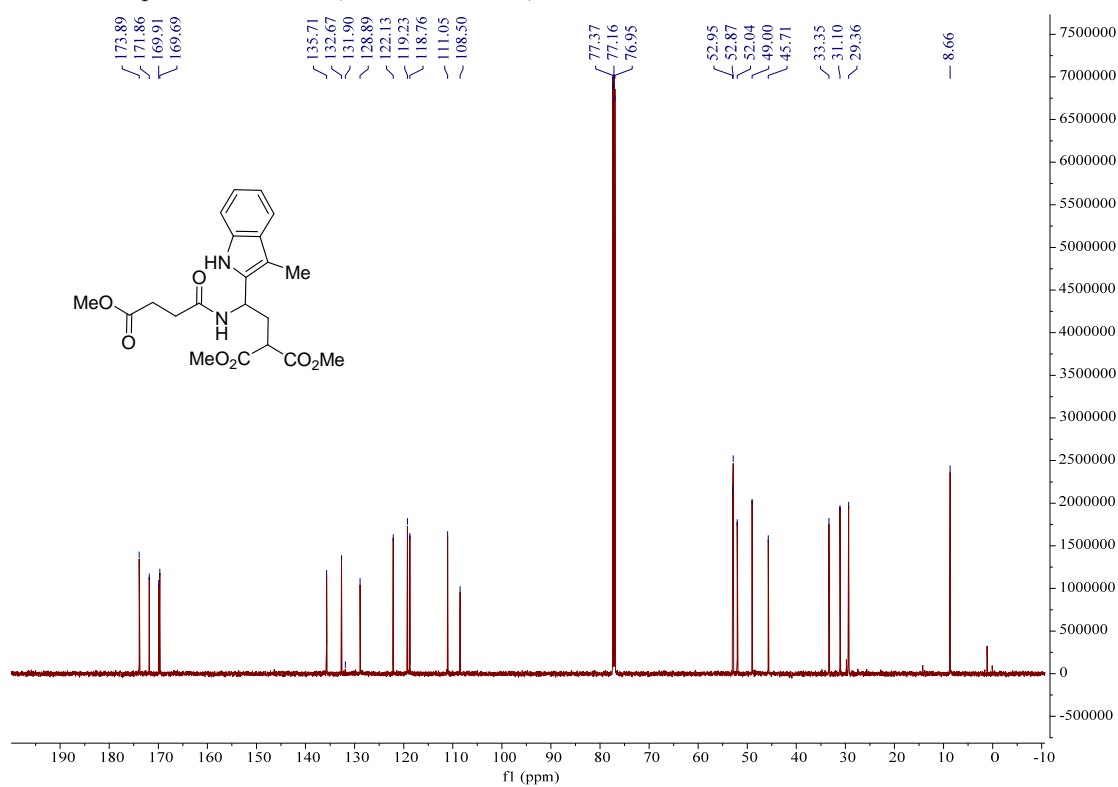

<sup>1</sup>H NMR Spectrum of **17aa** (600 MHz, CDCl<sub>3</sub>)

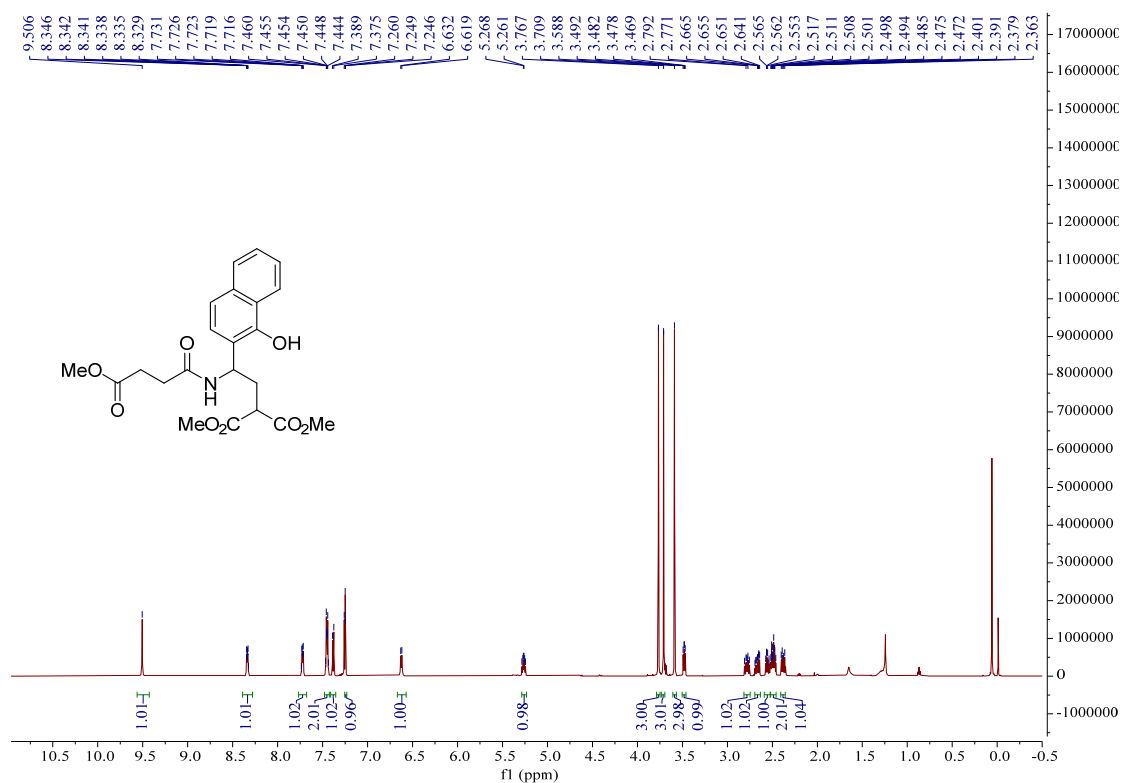

<sup>13</sup>C NMR Spectrum of **17aa** (150 MHz, CDCl<sub>3</sub>)

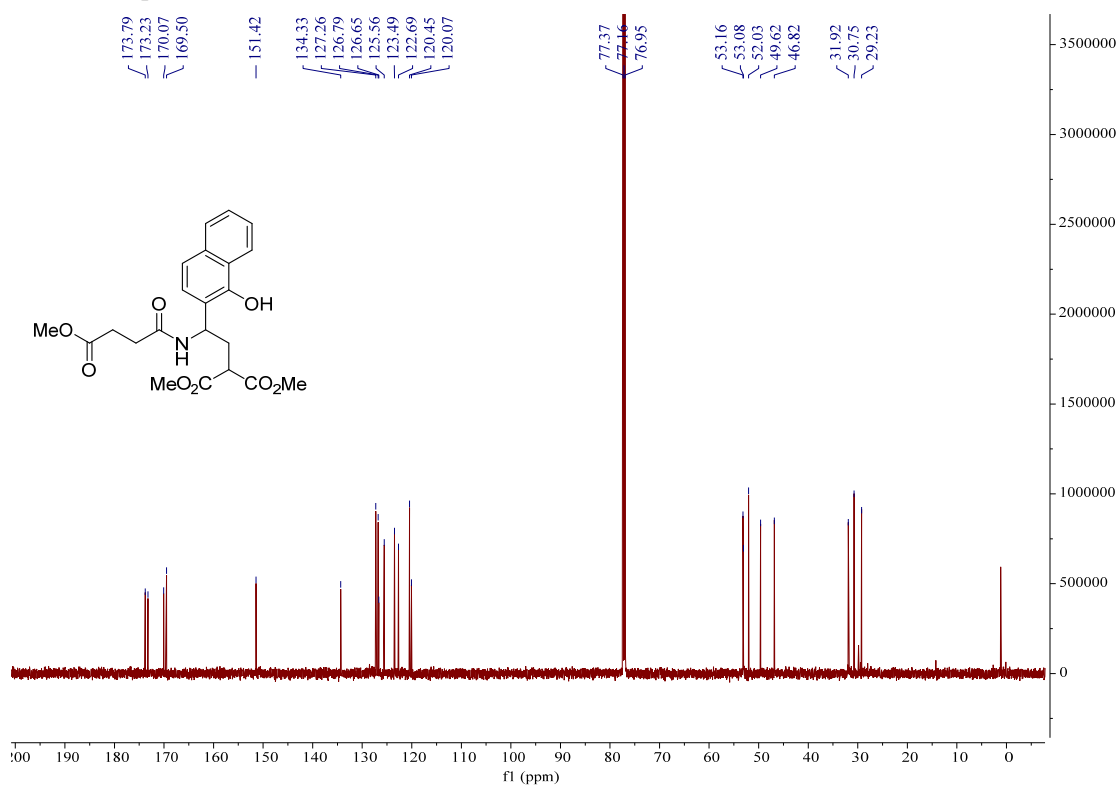

## HPLC spectra

### HPLC Spectrum of ( $\pm$ )-3aa

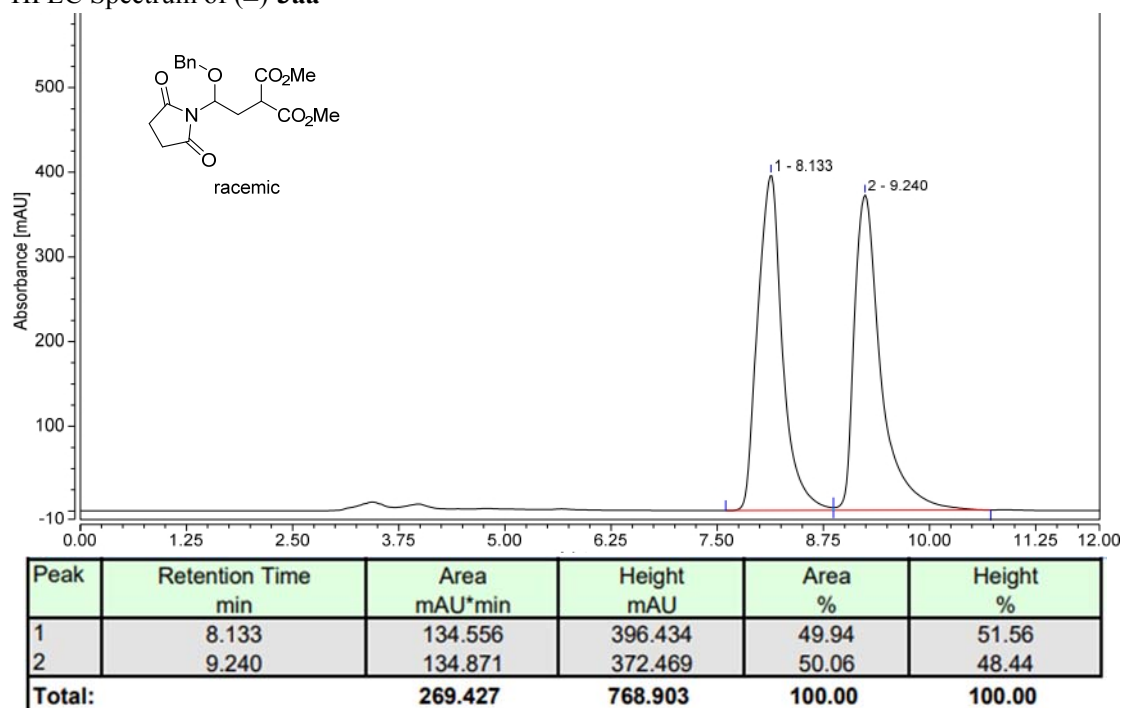

### HPLC Spectrum of (*S*)-3aa

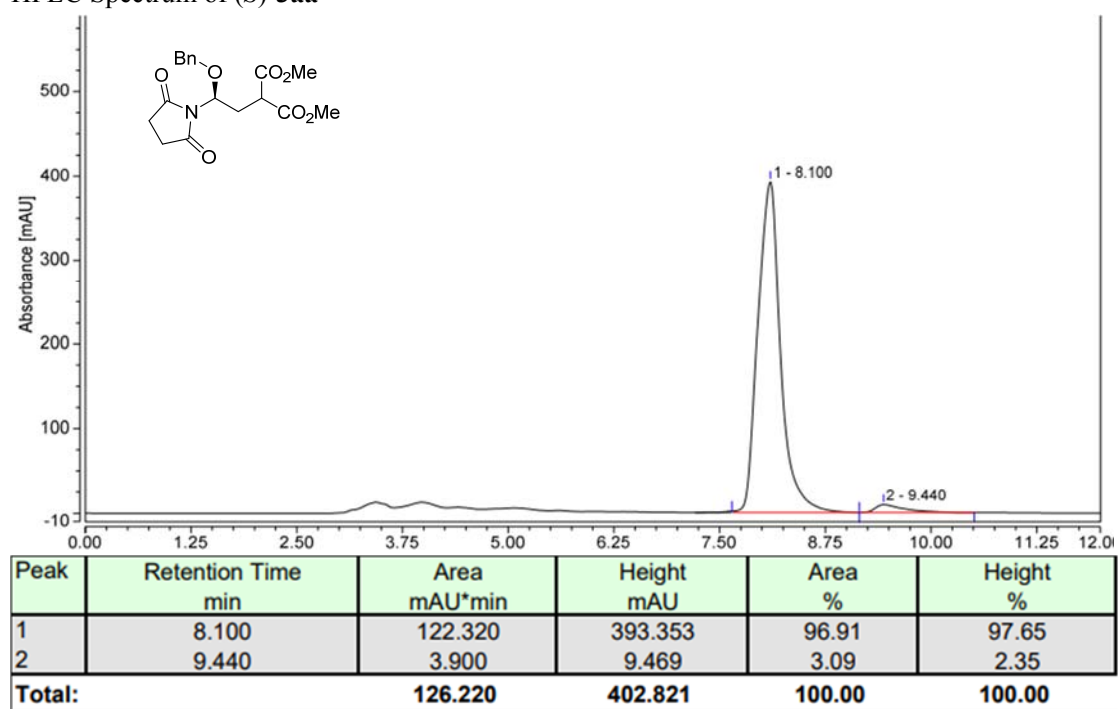

### HPLC Spectrum of (±)-3ab

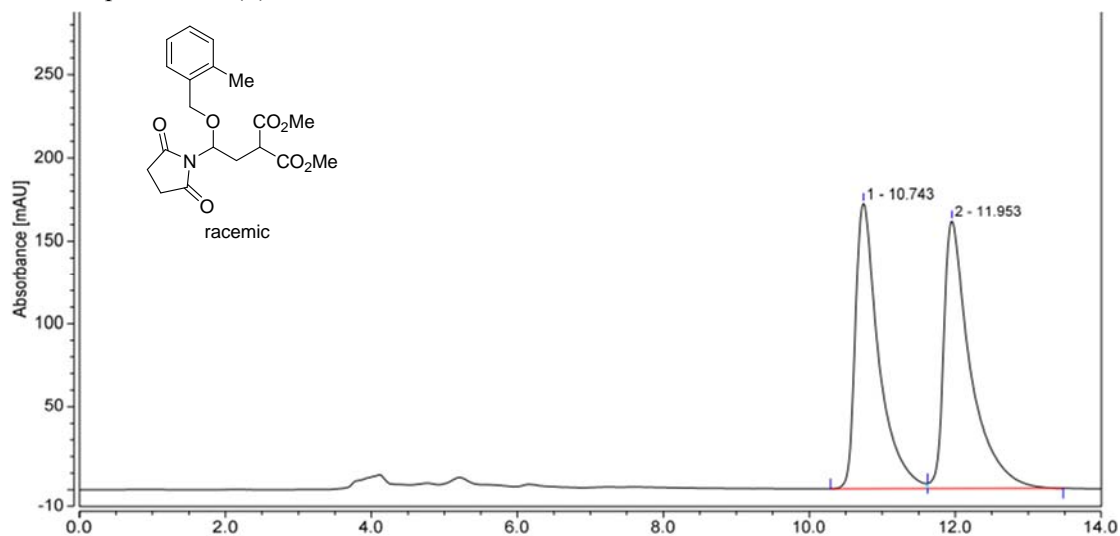

| Peak          | Retention Time<br>min | Area<br>mAU*min | Height<br>mAU  | Area<br>%     | Height<br>%   |
|---------------|-----------------------|-----------------|----------------|---------------|---------------|
| 1             | 10.743                | 63.899          | 172.308        | 48.38         | 51.61         |
| 2             | 11.953                | 68.184          | 161.584        | 51.62         | 48.39         |
| <b>Total:</b> |                       | <b>132.083</b>  | <b>333.892</b> | <b>100.00</b> | <b>100.00</b> |

### HPLC Spectrum of (S)-3ab

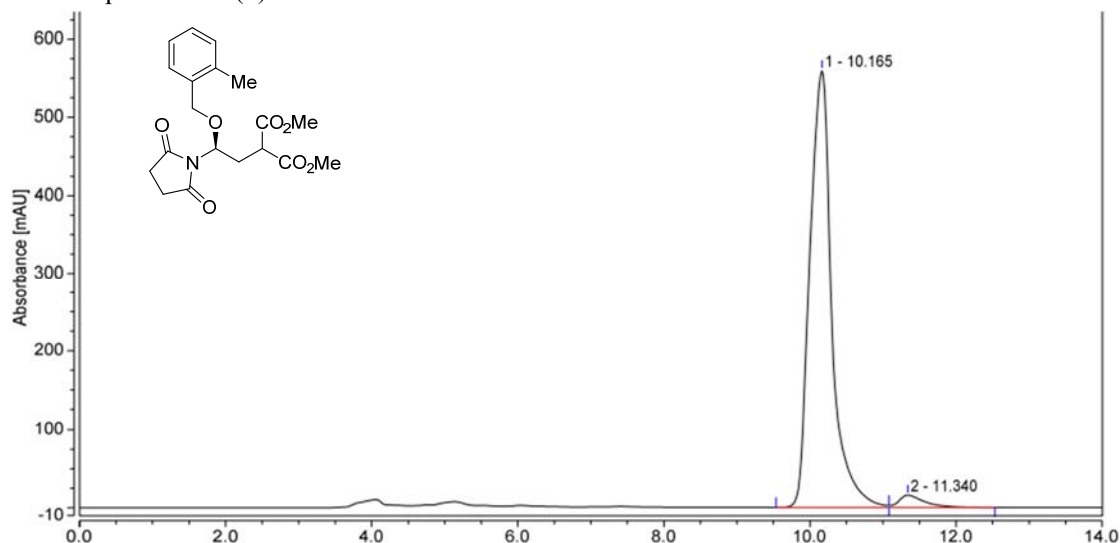

| Peak          | Retention Time<br>min | Area<br>mAU*min | Height<br>mAU  | Area<br>%     | Height<br>%   |
|---------------|-----------------------|-----------------|----------------|---------------|---------------|
| 1             | 10.165                | 193.828         | 559.553        | 96.80         | 97.26         |
| 2             | 11.340                | 6.399           | 15.789         | 3.20          | 2.74          |
| <b>Total:</b> |                       | <b>200.226</b>  | <b>575.342</b> | <b>100.00</b> | <b>100.00</b> |

### HPLC Spectrum of (±)-3ac

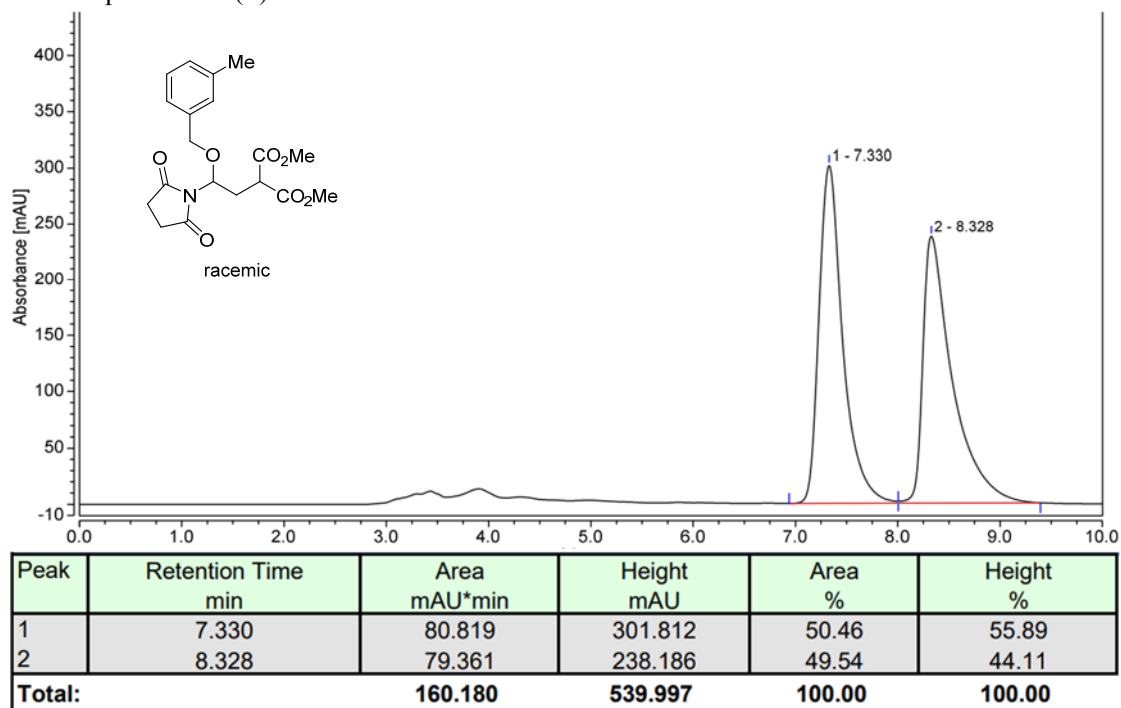

### HPLC Spectrum of (S)-3ab

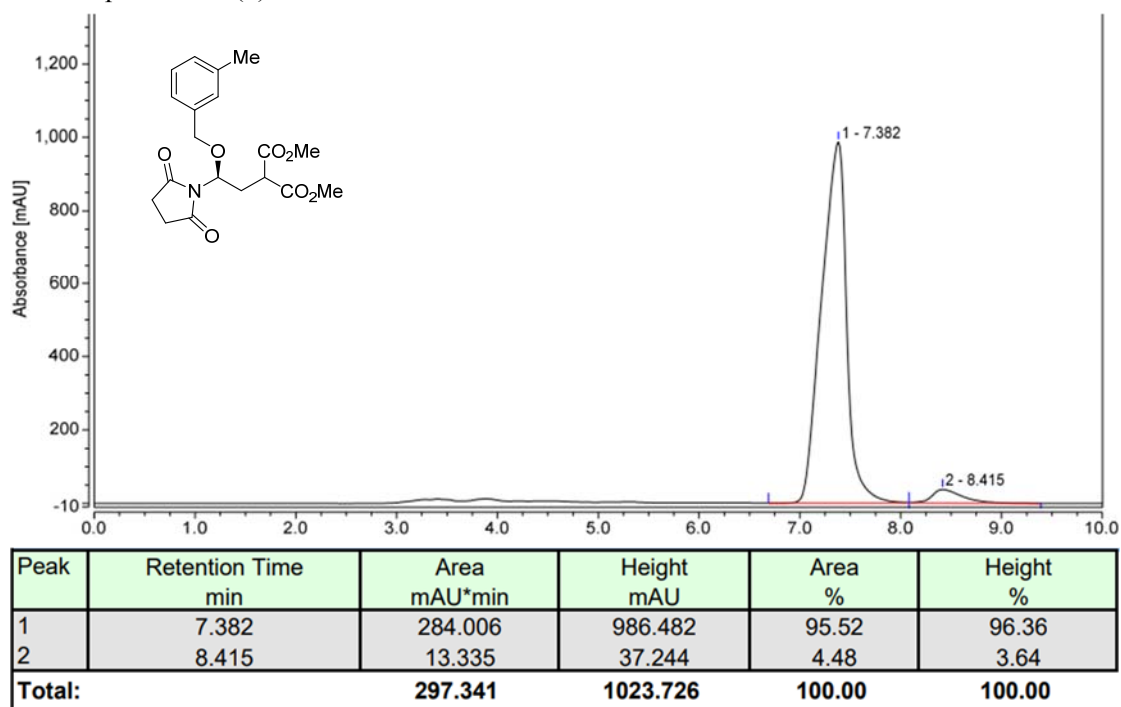



### HPLC Spectrum of (±)-3ad

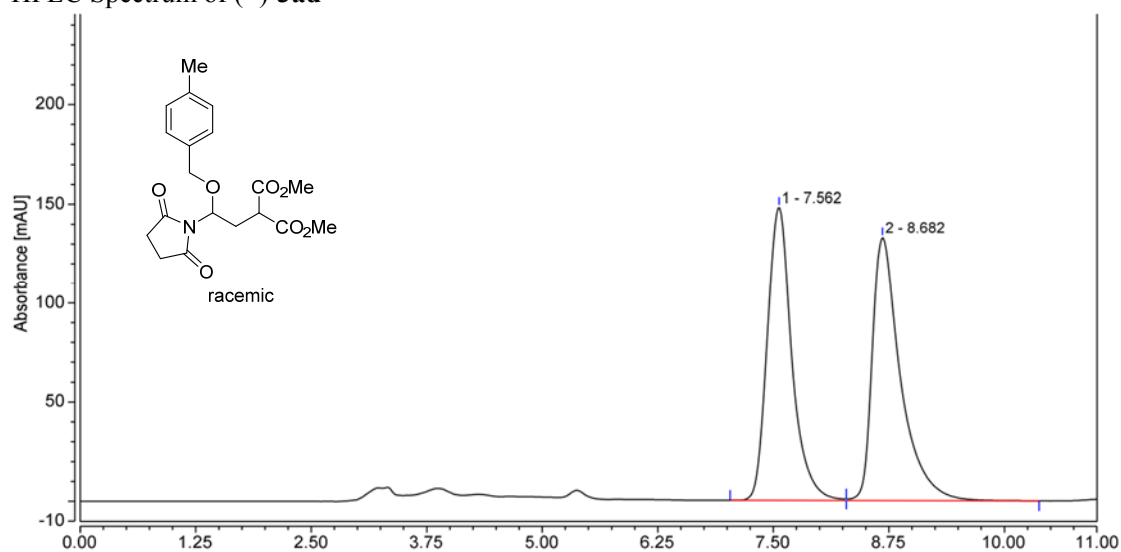

| Peak          | Retention Time<br>min | Area<br>mAU*min | Height<br>mAU  | Area<br>%     | Height<br>%   |
|---------------|-----------------------|-----------------|----------------|---------------|---------------|
| 1             | 7.562                 | 45.656          | 148.089        | 49.43         | 52.71         |
| 2             | 8.682                 | 46.718          | 132.879        | 50.57         | 47.29         |
| <b>Total:</b> |                       | <b>92.375</b>   | <b>280.968</b> | <b>100.00</b> | <b>100.00</b> |

### HPLC Spectrum of (S)-3ad

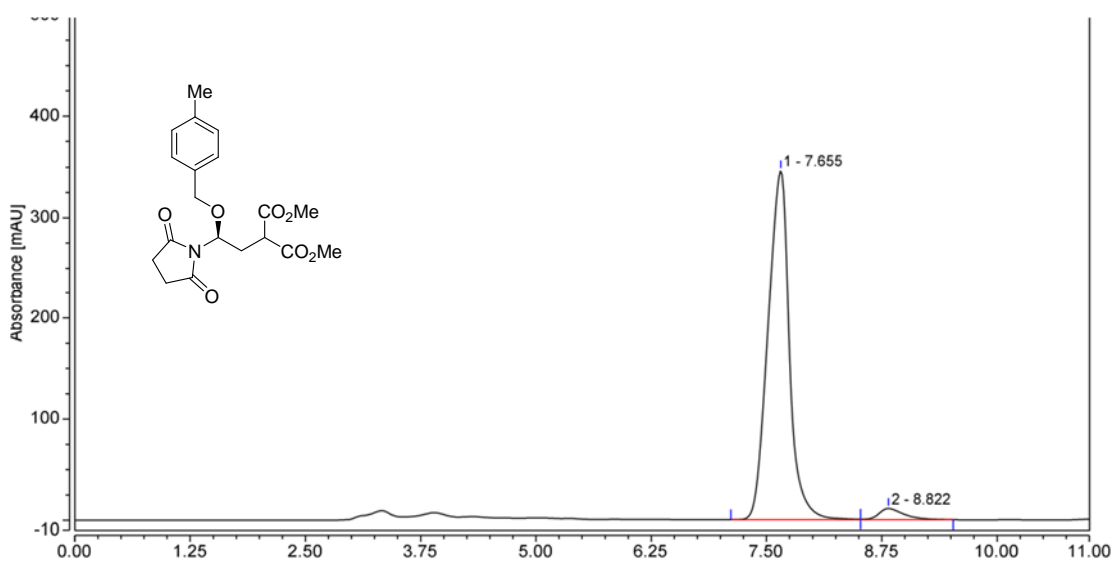

| Peak          | Retention Time<br>min | Area<br>mAU*min | Height<br>mAU  | Area<br>%     | Height<br>%   |
|---------------|-----------------------|-----------------|----------------|---------------|---------------|
| 1             | 7.655                 | 93.168          | 346.041        | 96.32         | 96.87         |
| 2             | 8.822                 | 3.555           | 11.164         | 3.68          | 3.13          |
| <b>Total:</b> |                       | <b>96.723</b>   | <b>357.205</b> | <b>100.00</b> | <b>100.00</b> |

### HPLC Spectrum of (±)-3ae

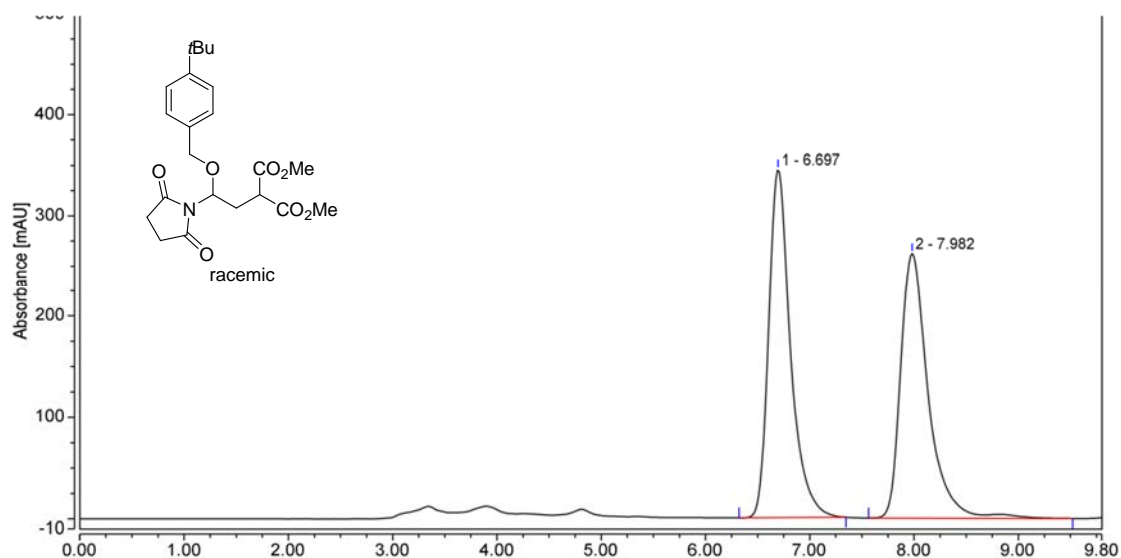

| Peak          | Retention Time<br>min | Area<br>mAU*min | Height<br>mAU  | Area<br>%     | Height<br>%   |
|---------------|-----------------------|-----------------|----------------|---------------|---------------|
| 1             | 6.697                 | 83.364          | 344.699        | 50.99         | 56.83         |
| 2             | 7.982                 | 80.119          | 261.817        | 49.01         | 43.17         |
| <b>Total:</b> |                       | <b>163.482</b>  | <b>606.516</b> | <b>100.00</b> | <b>100.00</b> |

### HPLC Spectrum of (S)-3ae

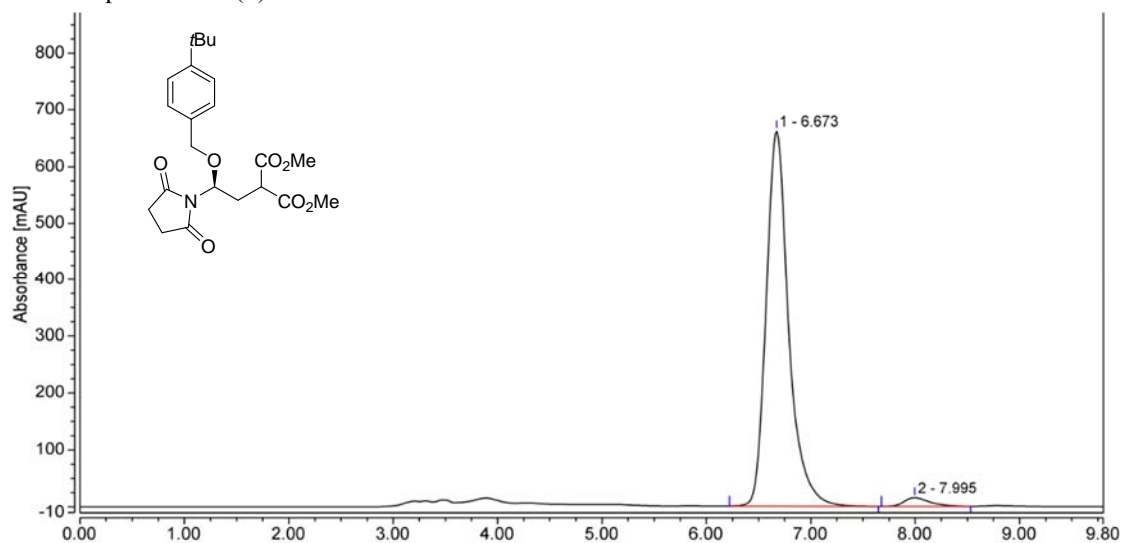

| Peak          | Retention Time<br>min | Area<br>mAU*min | Height<br>mAU  | Area<br>%     | Height<br>%   |
|---------------|-----------------------|-----------------|----------------|---------------|---------------|
| 1             | 6.673                 | 164.490         | 661.434        | 97.45         | 97.76         |
| 2             | 7.995                 | 4.300           | 15.189         | 2.55          | 2.24          |
| <b>Total:</b> |                       | <b>168.790</b>  | <b>676.623</b> | <b>100.00</b> | <b>100.00</b> |

### HPLC Spectrum of (±)-3af

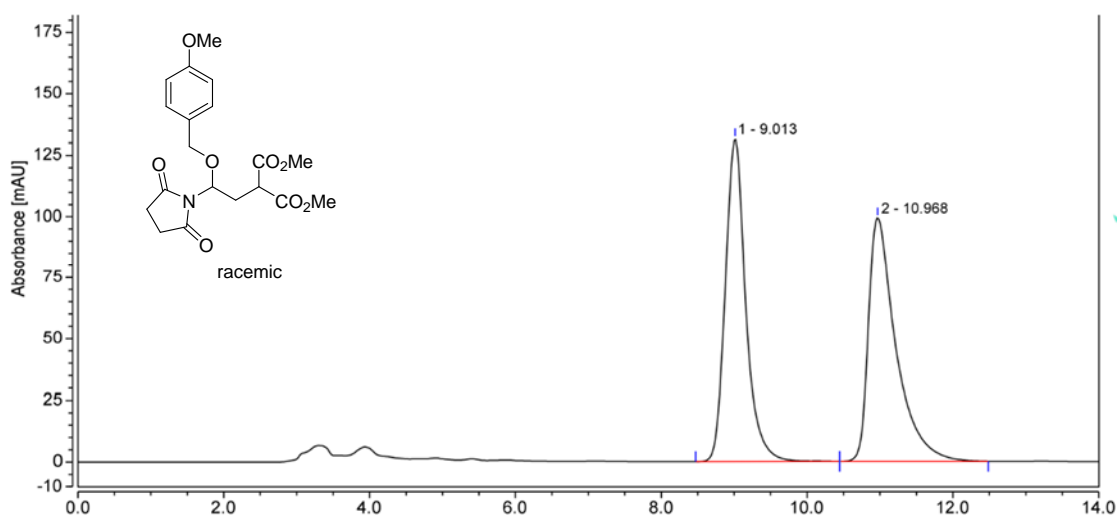

| Peak          | Retention Time min | Area mAU*min  | Height mAU     | Area %        | Height %      |
|---------------|--------------------|---------------|----------------|---------------|---------------|
| 1             | 9.013              | 42.737        | 131.489        | 49.78         | 56.96         |
| 2             | 10.968             | 43.123        | 99.354         | 50.22         | 43.04         |
| <b>Total:</b> |                    | <b>85.860</b> | <b>230.843</b> | <b>100.00</b> | <b>100.00</b> |

### HPLC Spectrum of (S)-3af

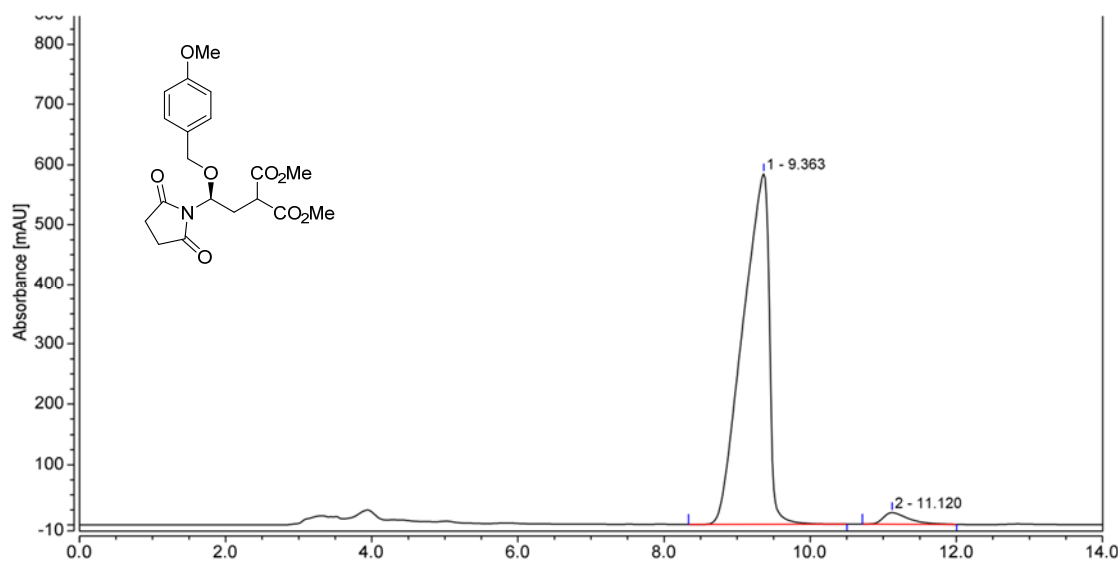

| Peak          | Retention Time min | Area mAU*min   | Height mAU     | Area %        | Height %      |
|---------------|--------------------|----------------|----------------|---------------|---------------|
| 1             | 9.363              | 243.548        | 584.193        | 96.90         | 96.80         |
| 2             | 11.120             | 7.797          | 19.308         | 3.10          | 3.20          |
| <b>Total:</b> |                    | <b>251.345</b> | <b>603.501</b> | <b>100.00</b> | <b>100.00</b> |

### HPLC Spectrum of (±)-3ag

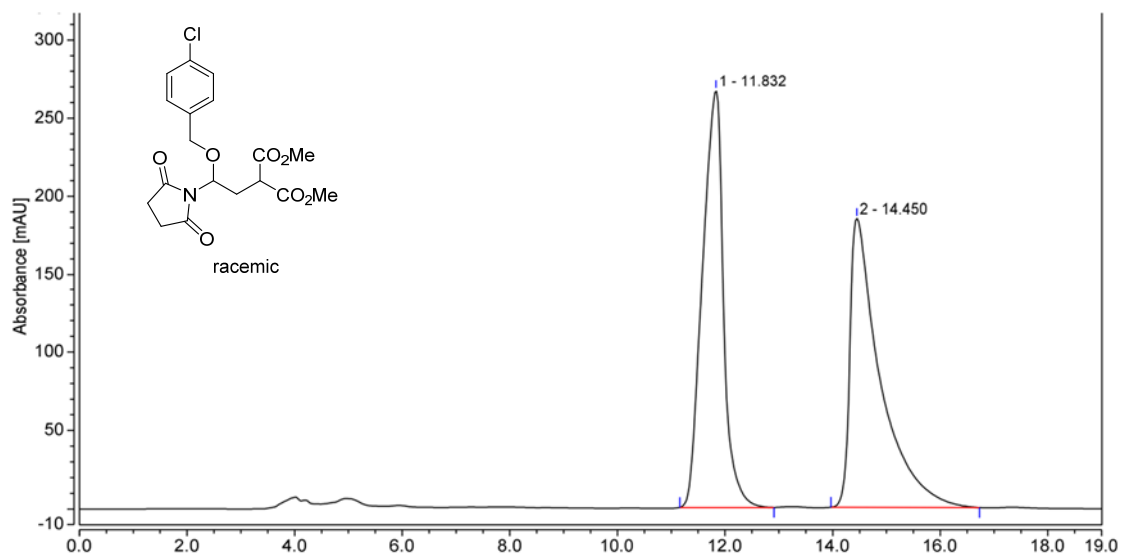

| Peak          | Retention Time<br>min | Area<br>mAU*min | Height<br>mAU  | Area<br>%     | Height<br>%   |
|---------------|-----------------------|-----------------|----------------|---------------|---------------|
| 1             | 11.832                | 120.338         | 266.776        | 50.12         | 59.07         |
| 2             | 14.450                | 119.781         | 184.872        | 49.88         | 40.93         |
| <b>Total:</b> |                       | <b>240.119</b>  | <b>451.649</b> | <b>100.00</b> | <b>100.00</b> |

### HPLC Spectrum of (S)-3ag

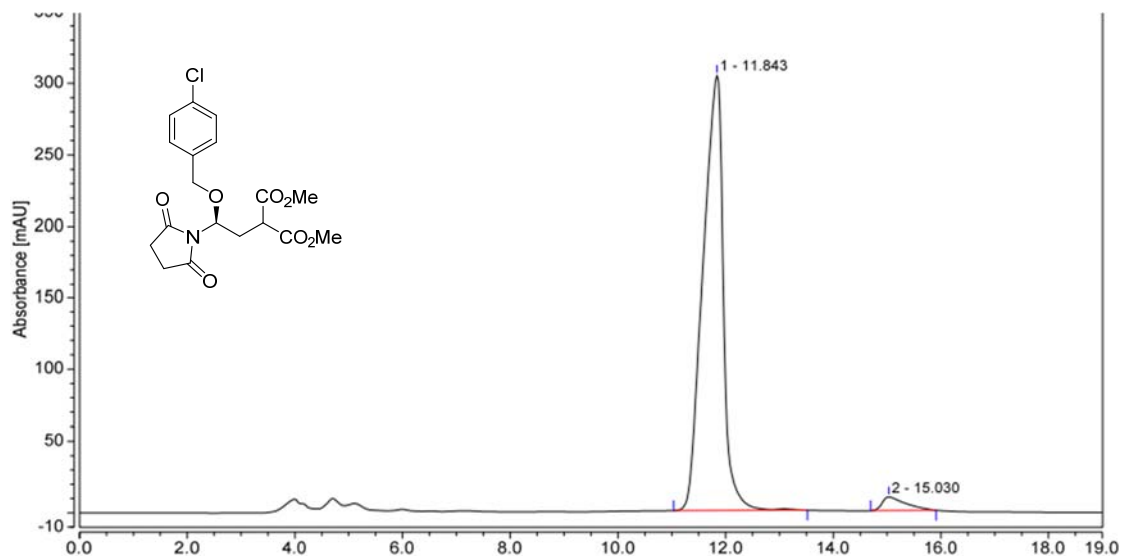

| Peak          | Retention Time<br>min | Area<br>mAU*min | Height<br>mAU  | Area<br>%     | Height<br>%   |
|---------------|-----------------------|-----------------|----------------|---------------|---------------|
| 1             | 11.843                | 132.671         | 303.866        | 96.51         | 97.00         |
| 2             | 15.030                | 4.796           | 9.413          | 3.49          | 3.00          |
| <b>Total:</b> |                       | <b>137.467</b>  | <b>313.279</b> | <b>100.00</b> | <b>100.00</b> |

### HPLC Spectrum of (±)-3ah

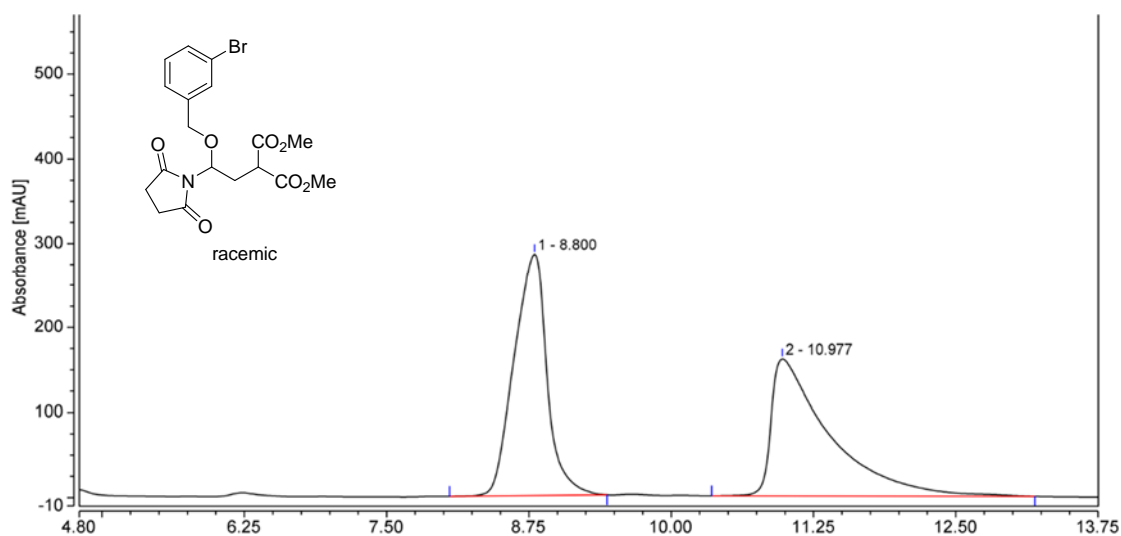

| Peak          | Retention Time<br>min | Area<br>mAU*min | Height<br>mAU  | Area<br>%     | Height<br>%   |
|---------------|-----------------------|-----------------|----------------|---------------|---------------|
| 1             | 8.800                 | 95.664          | 284.998        | 50.12         | 63.94         |
| 2             | 10.977                | 95.218          | 160.738        | 49.88         | 36.06         |
| <b>Total:</b> |                       | <b>190.881</b>  | <b>445.735</b> | <b>100.00</b> | <b>100.00</b> |

### HPLC Spectrum of (S)-3ah

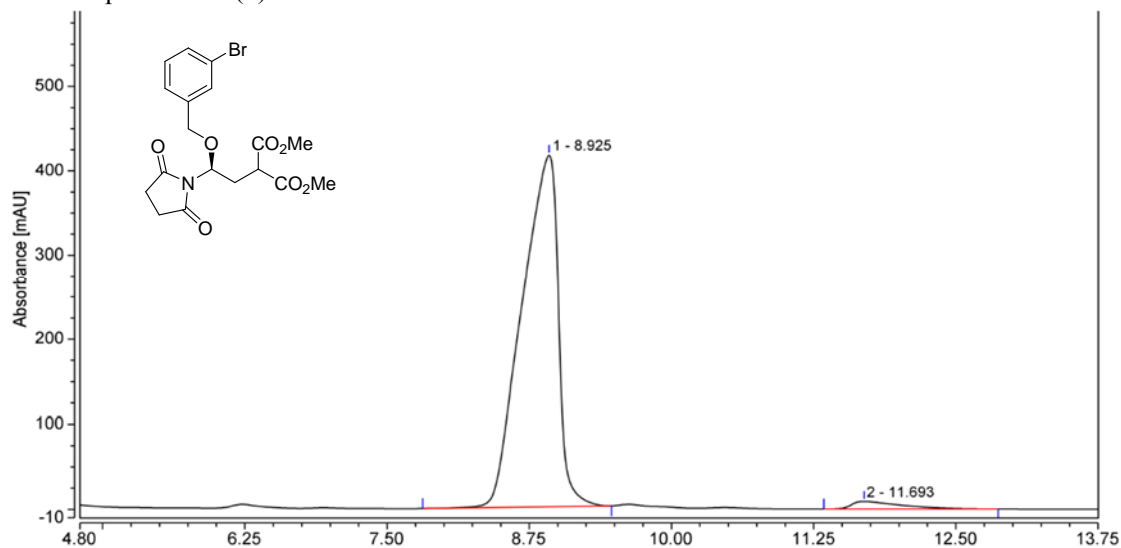

| Peak          | Retention Time<br>min | Area<br>mAU*min | Height<br>mAU  | Area<br>%     | Height<br>%   |
|---------------|-----------------------|-----------------|----------------|---------------|---------------|
| 1             | 8.925                 | 153.681         | 415.577        | 97.12         | 97.88         |
| 2             | 11.693                | 4.558           | 8.996          | 2.88          | 2.12          |
| <b>Total:</b> |                       | <b>158.240</b>  | <b>424.573</b> | <b>100.00</b> | <b>100.00</b> |

### HPLC Spectrum of (±)-3ai

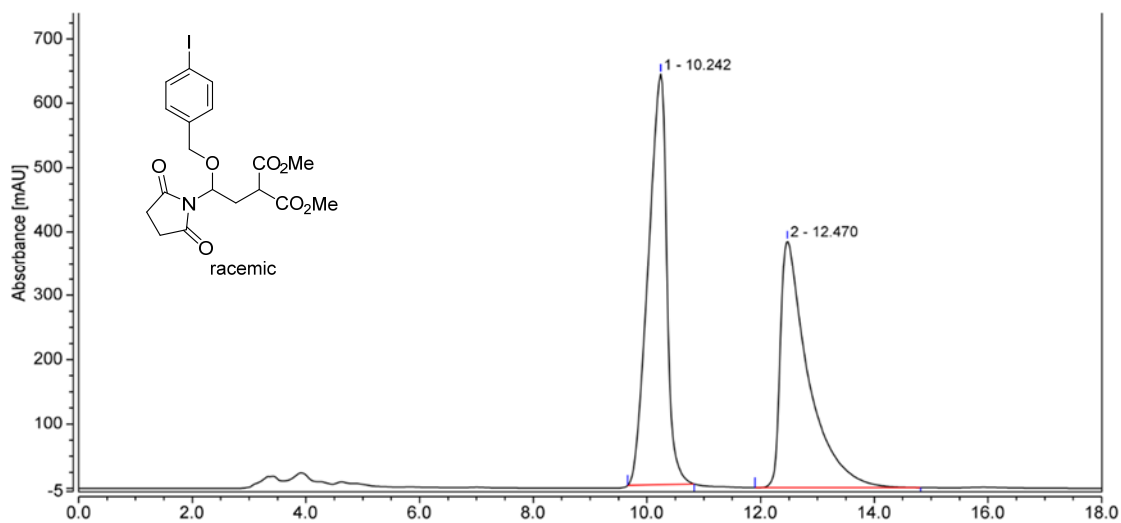

| Peak          | Retention Time<br>min | Area<br>mAU*min | Height<br>mAU   | Area<br>%     | Height<br>%   |
|---------------|-----------------------|-----------------|-----------------|---------------|---------------|
| 1             | 10.242                | 240.671         | 639.324         | 52.45         | 62.44         |
| 2             | 12.470                | 218.204         | 384.623         | 47.55         | 37.56         |
| <b>Total:</b> |                       | <b>458.875</b>  | <b>1023.947</b> | <b>100.00</b> | <b>100.00</b> |

### HPLC Spectrum of (S)-3ai

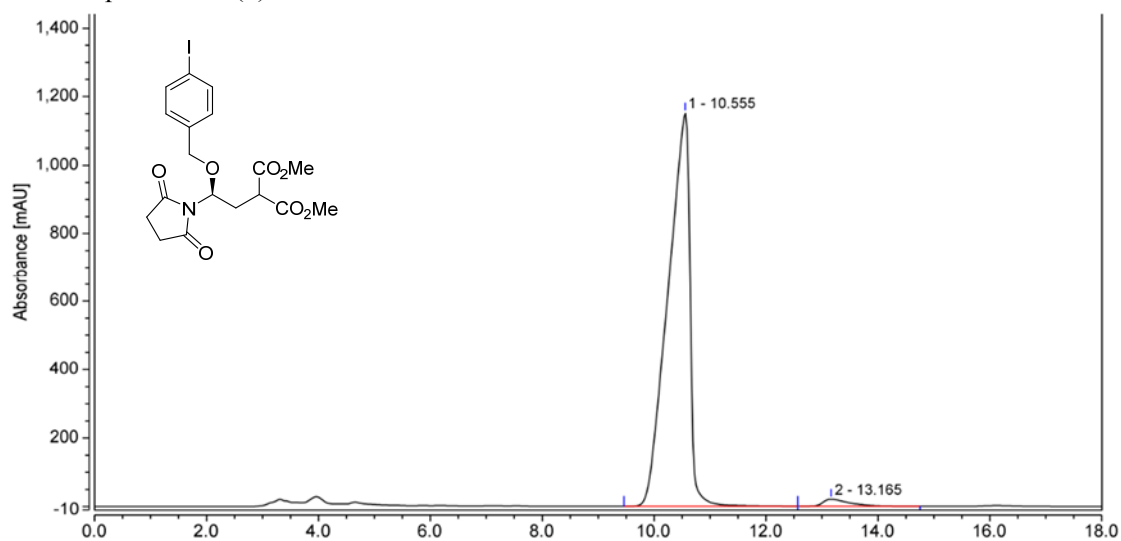

| Peak          | Retention Time<br>min | Area<br>mAU*min | Height<br>mAU   | Area<br>%     | Height<br>%   |
|---------------|-----------------------|-----------------|-----------------|---------------|---------------|
| 1             | 10.555                | 522.670         | 1151.427        | 97.82         | 98.23         |
| 2             | 13.165                | 11.629          | 20.765          | 2.18          | 1.77          |
| <b>Total:</b> |                       | <b>534.298</b>  | <b>1172.192</b> | <b>100.00</b> | <b>100.00</b> |

### HPLC Spectrum of (±)-3aj

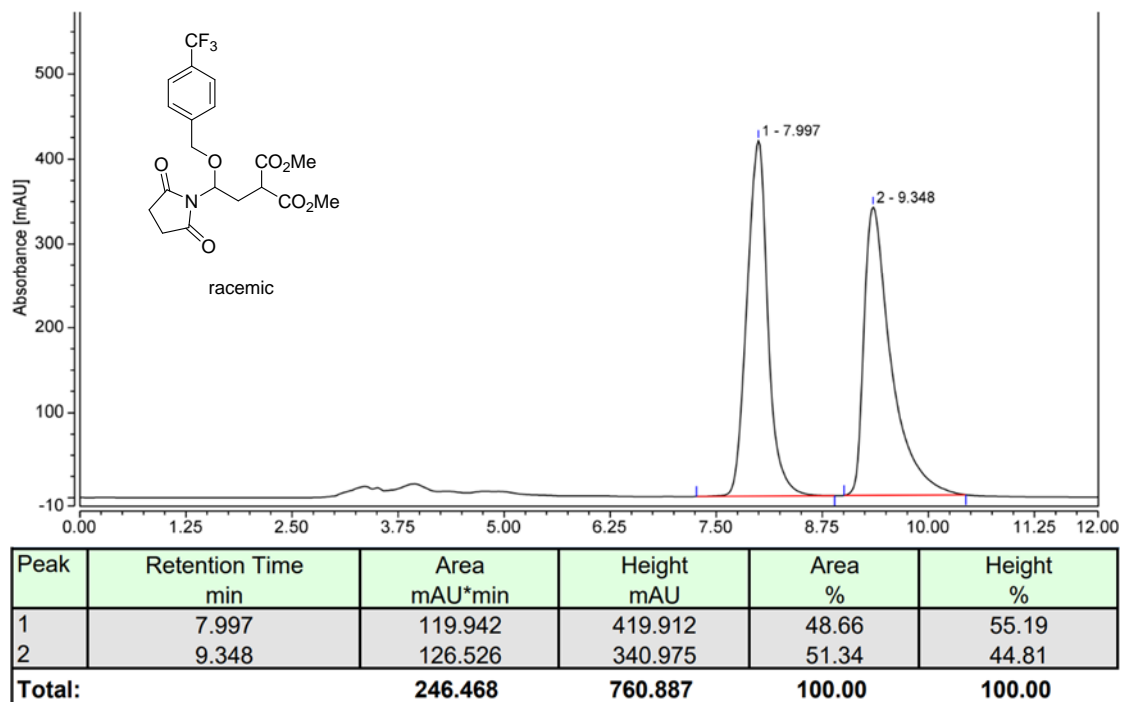

### HPLC Spectrum of (S)-3aj

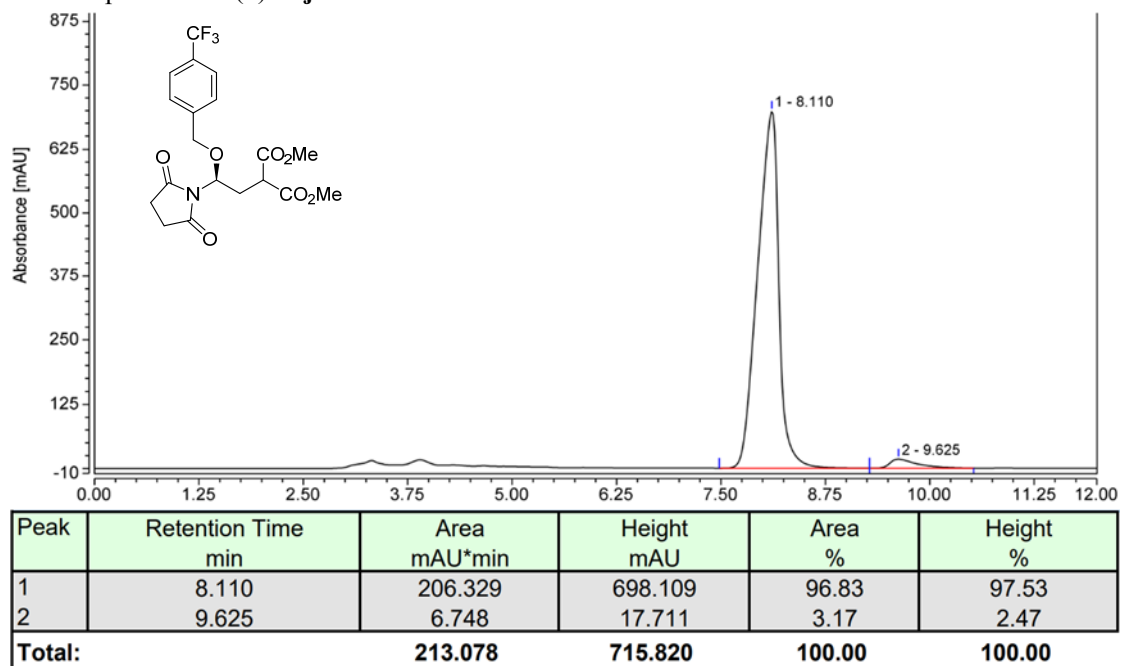

### HPLC Spectrum of (±)-3a1

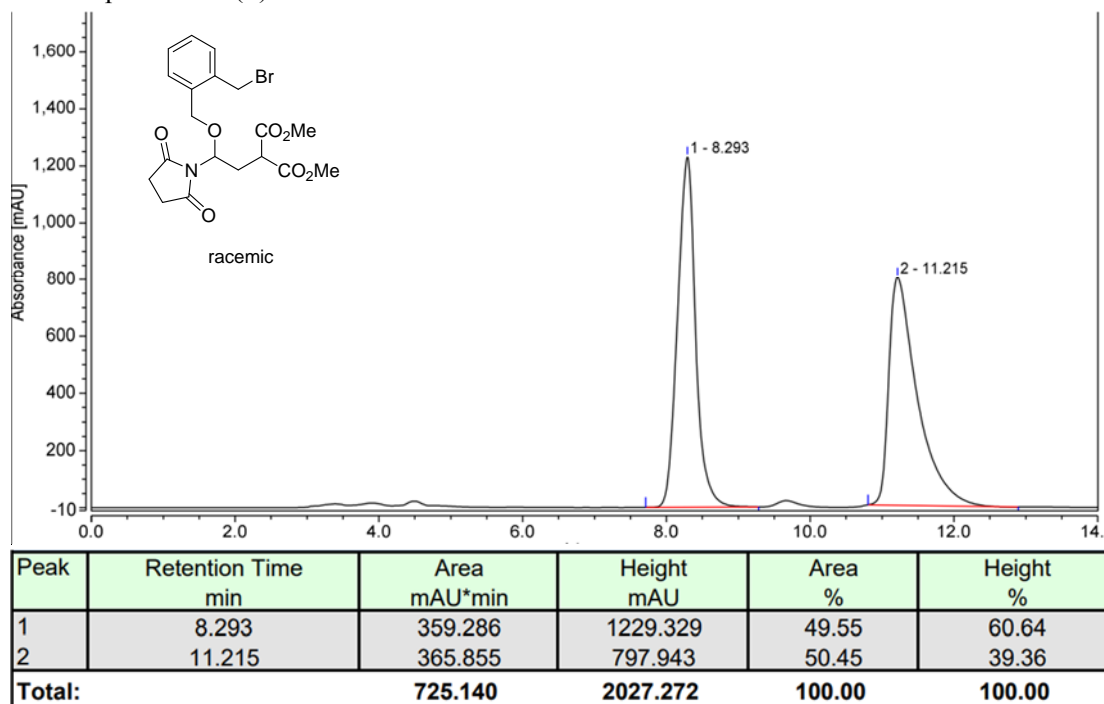

### HPLC Spectrum of (S)-3a1

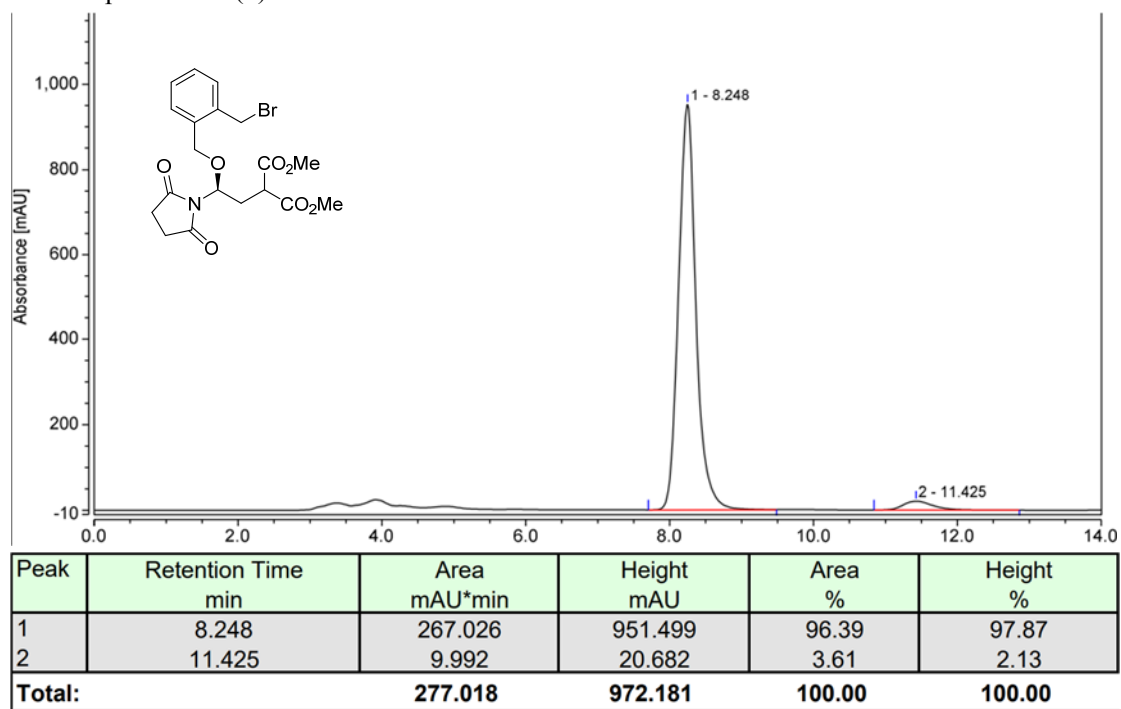



### HPLC Spectrum of (±)-3am

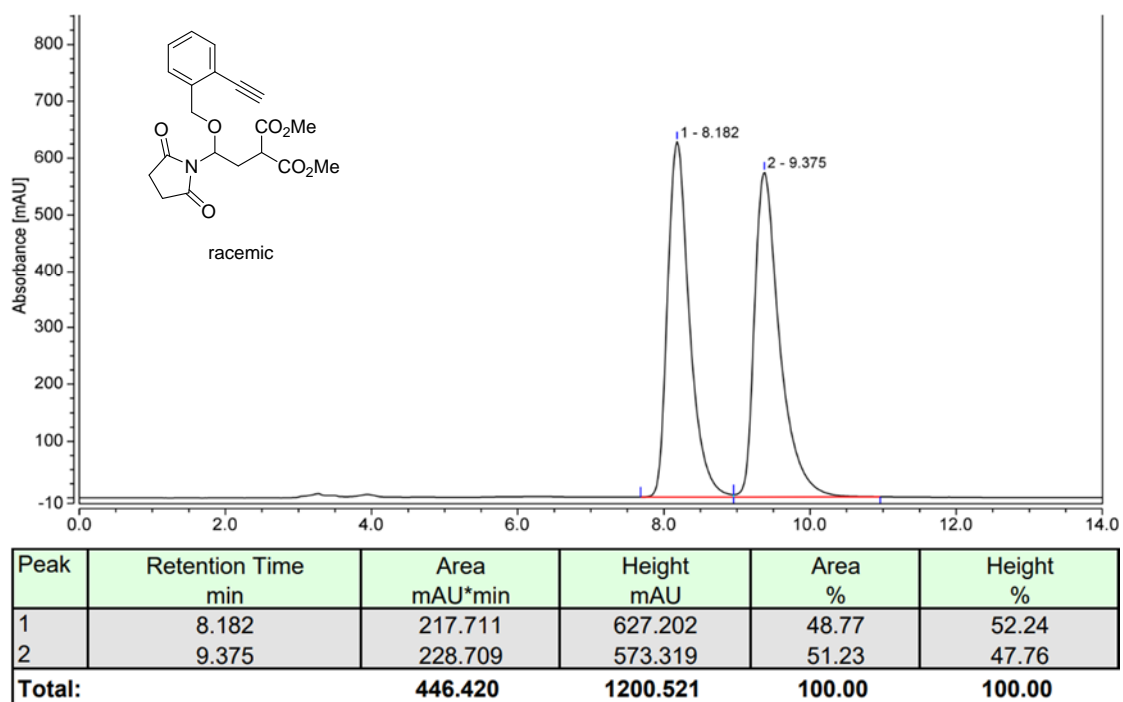

### HPLC Spectrum of (S)-3am

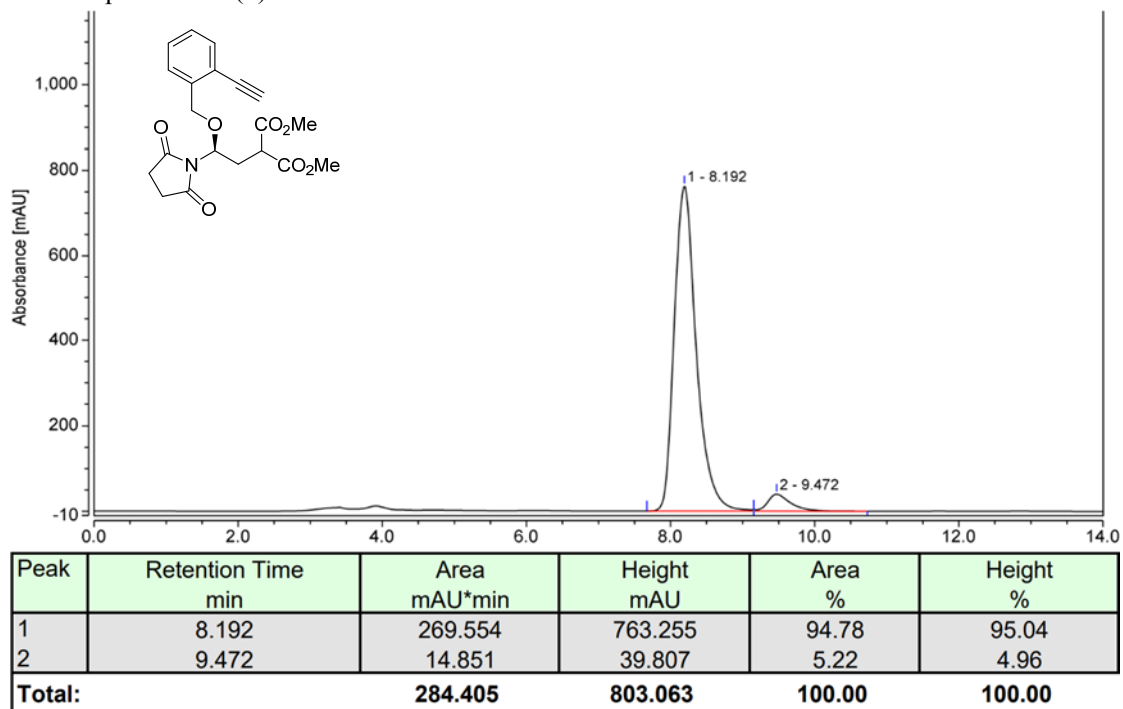

### HPLC Spectrum of (±)-3an

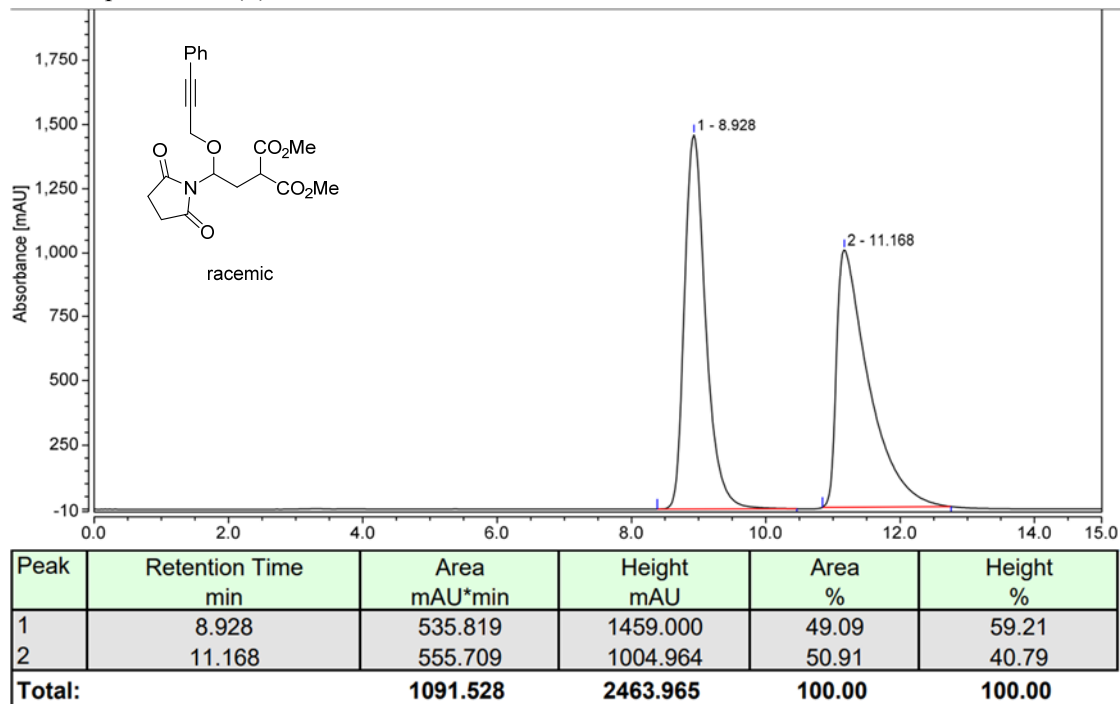

### HPLC Spectrum of (S)-3an

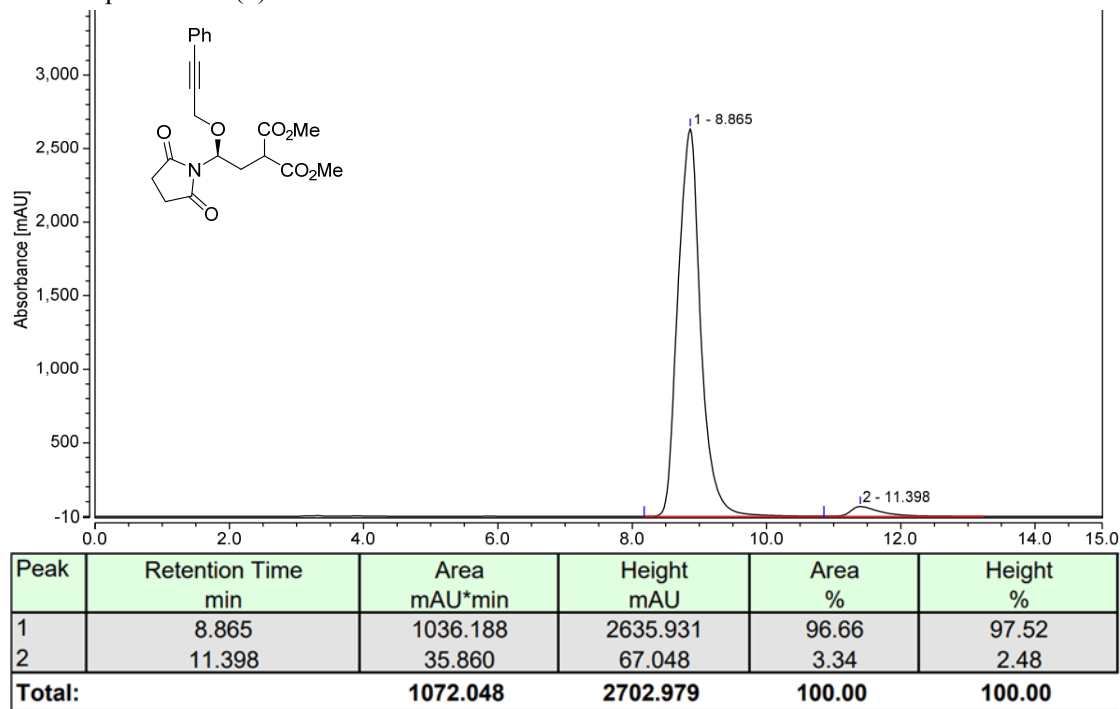

### HPLC Spectrum of (±)-3ao

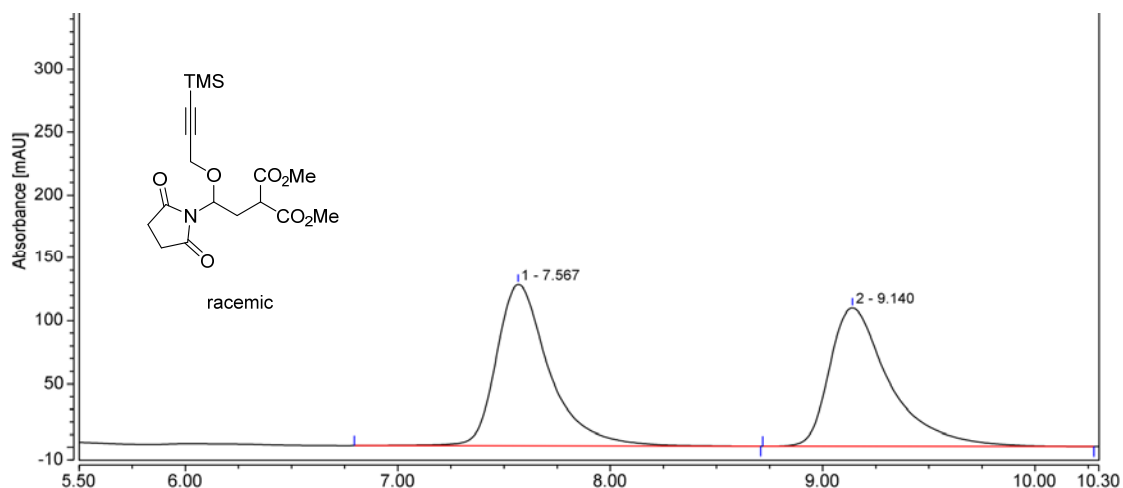

| Peak          | Retention Time<br>min | Area<br>mAU*min | Height<br>mAU  | Area<br>%     | Height<br>%   |
|---------------|-----------------------|-----------------|----------------|---------------|---------------|
| 1             | 7.567                 | 36.862          | 127.354        | 50.69         | 53.84         |
| 2             | 9.140                 | 35.853          | 109.201        | 49.31         | 46.16         |
| <b>Total:</b> |                       | <b>72.715</b>   | <b>236.555</b> | <b>100.00</b> | <b>100.00</b> |

### HPLC Spectrum of (S)-3ao

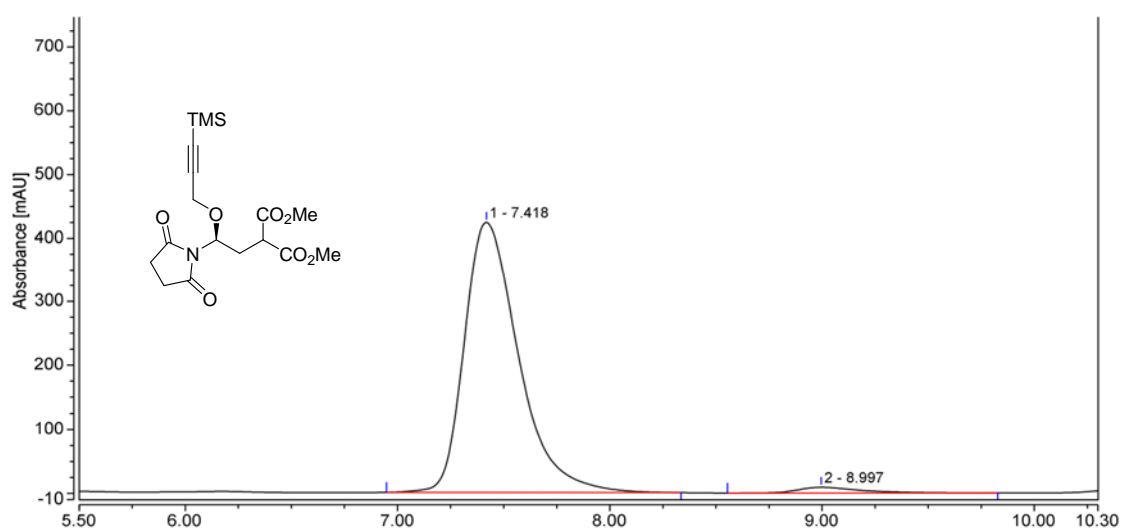

| Peak          | Retention Time<br>min | Area<br>mAU*min | Height<br>mAU  | Area<br>%     | Height<br>%   |
|---------------|-----------------------|-----------------|----------------|---------------|---------------|
| 1             | 7.418                 | 125.259         | 423.820        | 97.58         | 97.94         |
| 2             | 8.997                 | 3.105           | 8.927          | 2.42          | 2.06          |
| <b>Total:</b> |                       | <b>128.365</b>  | <b>432.747</b> | <b>100.00</b> | <b>100.00</b> |

### HPLC Spectrum of (±)-3ap

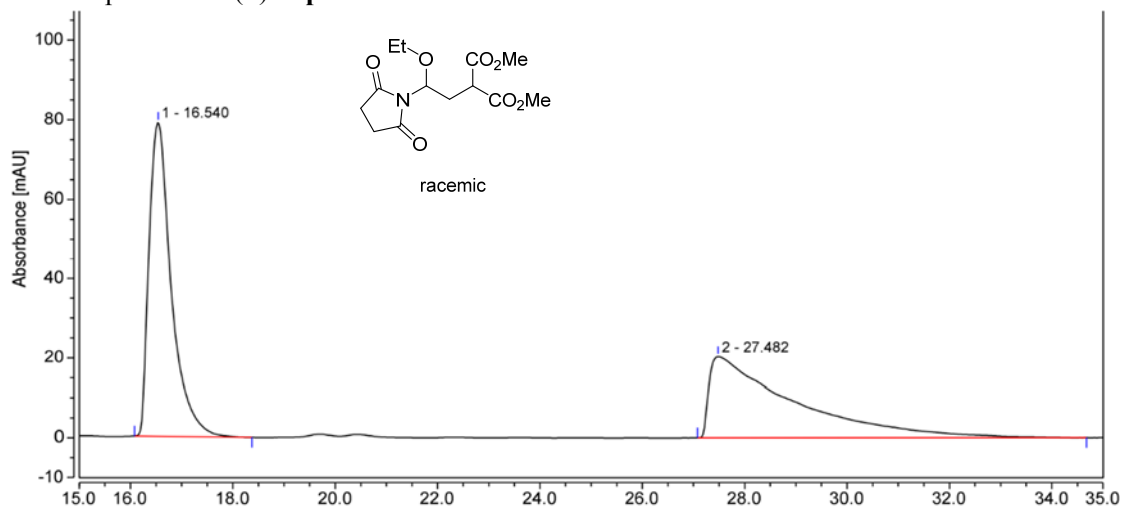

| Peak          | Retention Time<br>min | Area<br>mAU*min | Height<br>mAU | Area<br>%     | Height<br>%   |
|---------------|-----------------------|-----------------|---------------|---------------|---------------|
| 1             | 16.540                | 39.640          | 78.977        | 50.81         | 79.57         |
| 2             | 27.482                | 38.380          | 20.281        | 49.19         | 20.43         |
| <b>Total:</b> |                       | <b>78.020</b>   | <b>99.258</b> | <b>100.00</b> | <b>100.00</b> |

### HPLC Spectrum of (S)-3ap

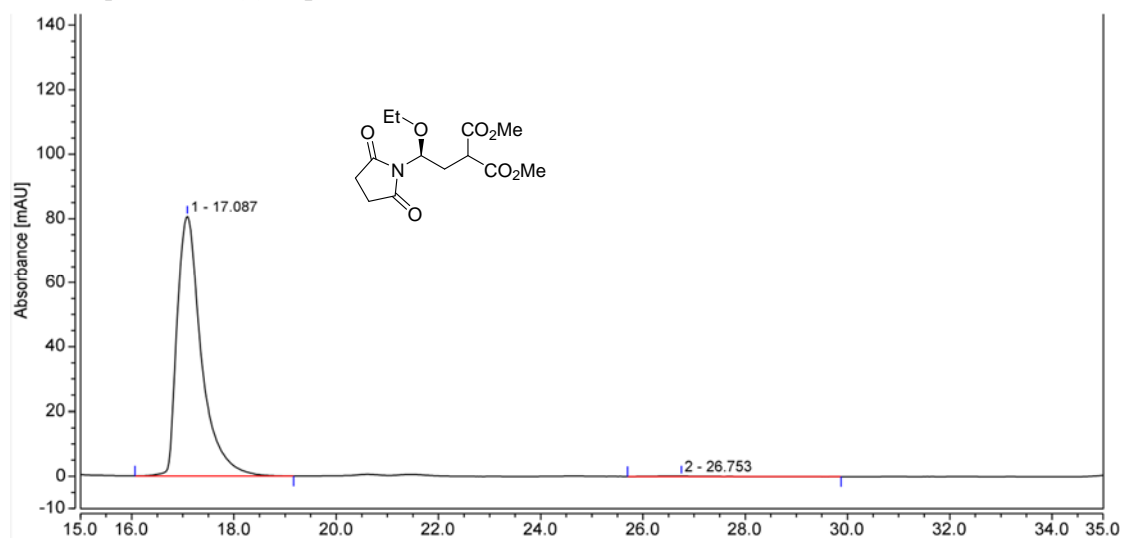

| Peak          | Retention Time<br>min | Area<br>mAU*min | Height<br>mAU | Area<br>%     | Height<br>%   |
|---------------|-----------------------|-----------------|---------------|---------------|---------------|
| 1             | 17.087                | 44.155          | 80.640        | 99.60         | 99.82         |
| 2             | 26.753                | 0.179           | 0.146         | 0.40          | 0.18          |
| <b>Total:</b> |                       | <b>44.333</b>   | <b>80.786</b> | <b>100.00</b> | <b>100.00</b> |

### HPLC Spectrum of (±)-3aq

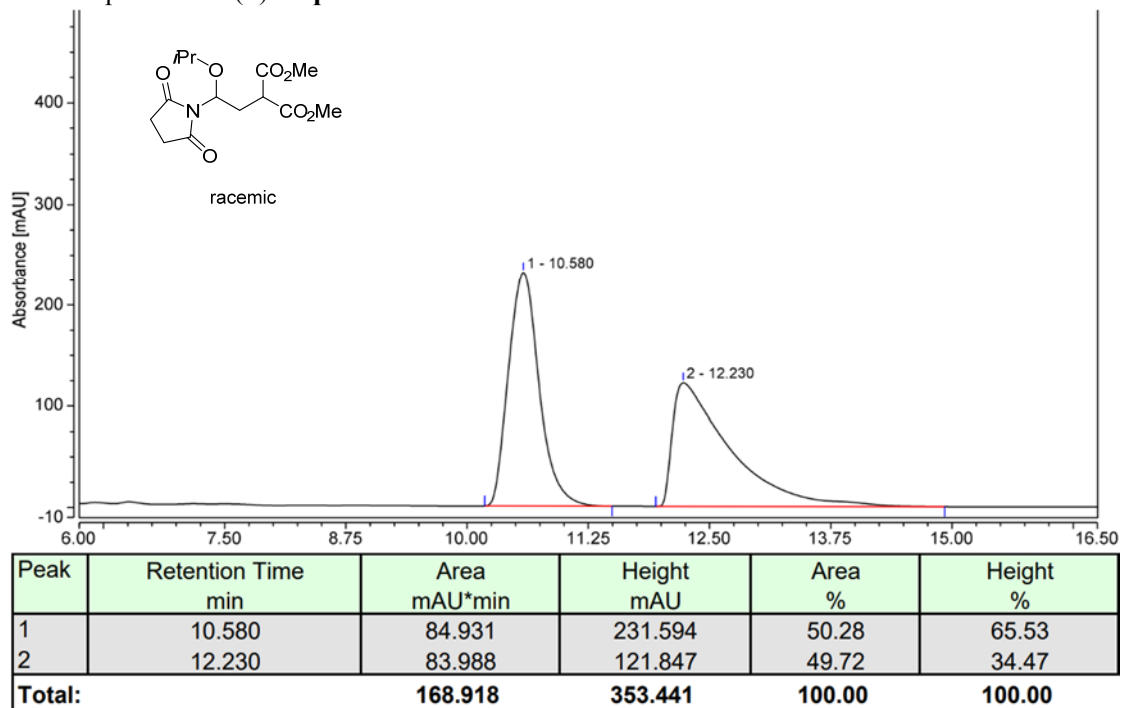

### HPLC Spectrum of (S)-3aq

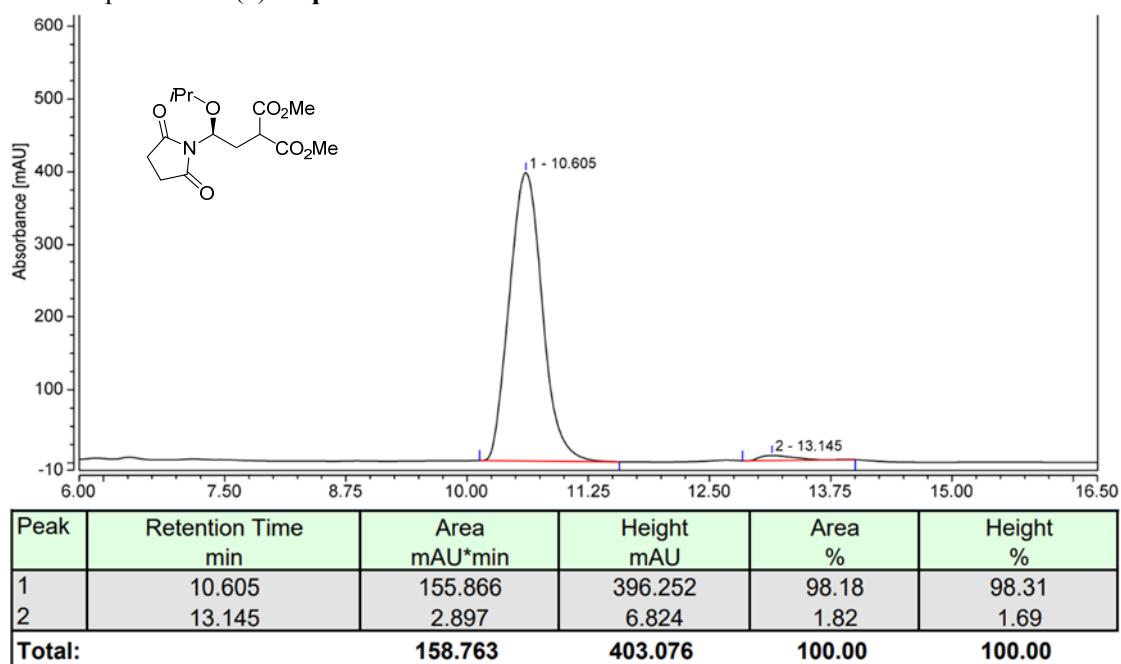

### HPLC Spectrum of (±)-3ar

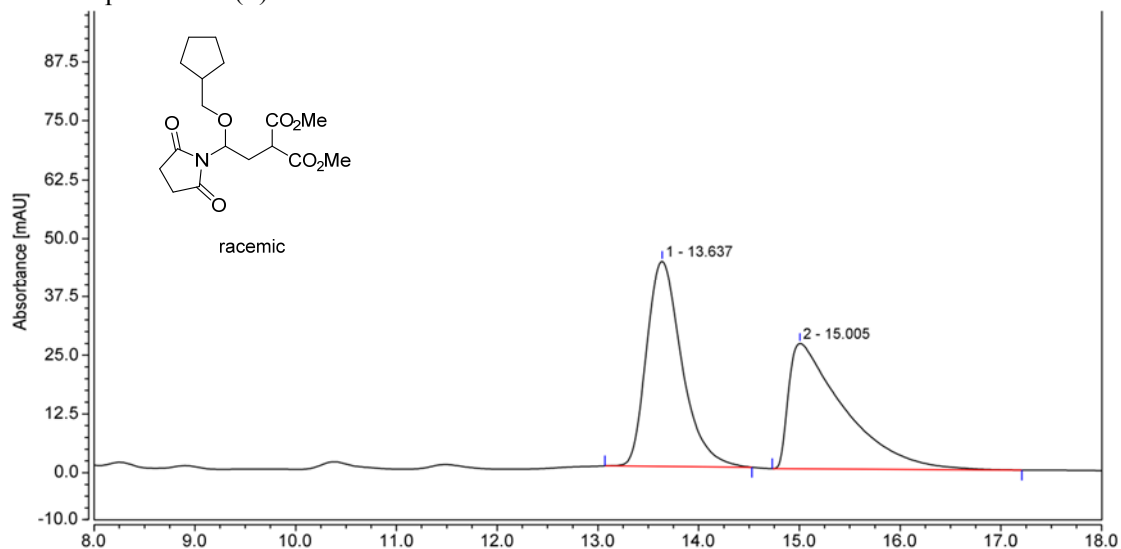

| Peak          | Retention Time<br>min | Area<br>mAU*min | Height<br>mAU | Area<br>%     | Height<br>%   |
|---------------|-----------------------|-----------------|---------------|---------------|---------------|
| 1             | 13.637                | 17.744          | 43.866        | 51.03         | 62.18         |
| 2             | 15.005                | 17.031          | 26.676        | 48.97         | 37.82         |
| <b>Total:</b> |                       | <b>34.775</b>   | <b>70.542</b> | <b>100.00</b> | <b>100.00</b> |

### HPLC Spectrum of (S)-3ar

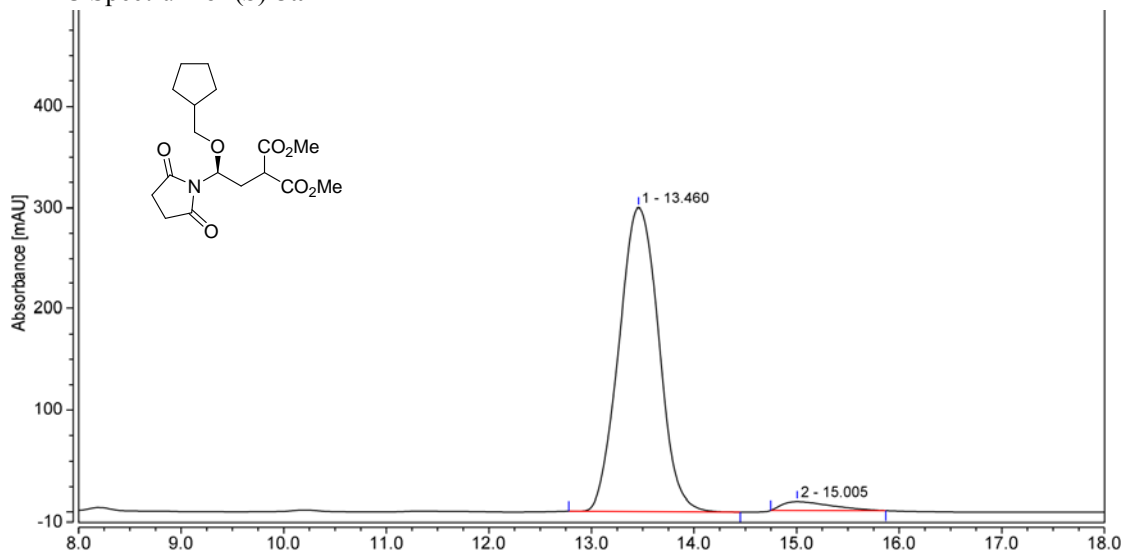

| Peak          | Retention Time<br>min | Area<br>mAU*min | Height<br>mAU  | Area<br>%     | Height<br>%   |
|---------------|-----------------------|-----------------|----------------|---------------|---------------|
| 1             | 13.460                | 134.130         | 300.124        | 96.41         | 97.11         |
| 2             | 15.005                | 5.000           | 8.934          | 3.59          | 2.89          |
| <b>Total:</b> |                       | <b>139.130</b>  | <b>309.058</b> | <b>100.00</b> | <b>100.00</b> |

### HPLC Spectrum of (±)-3as

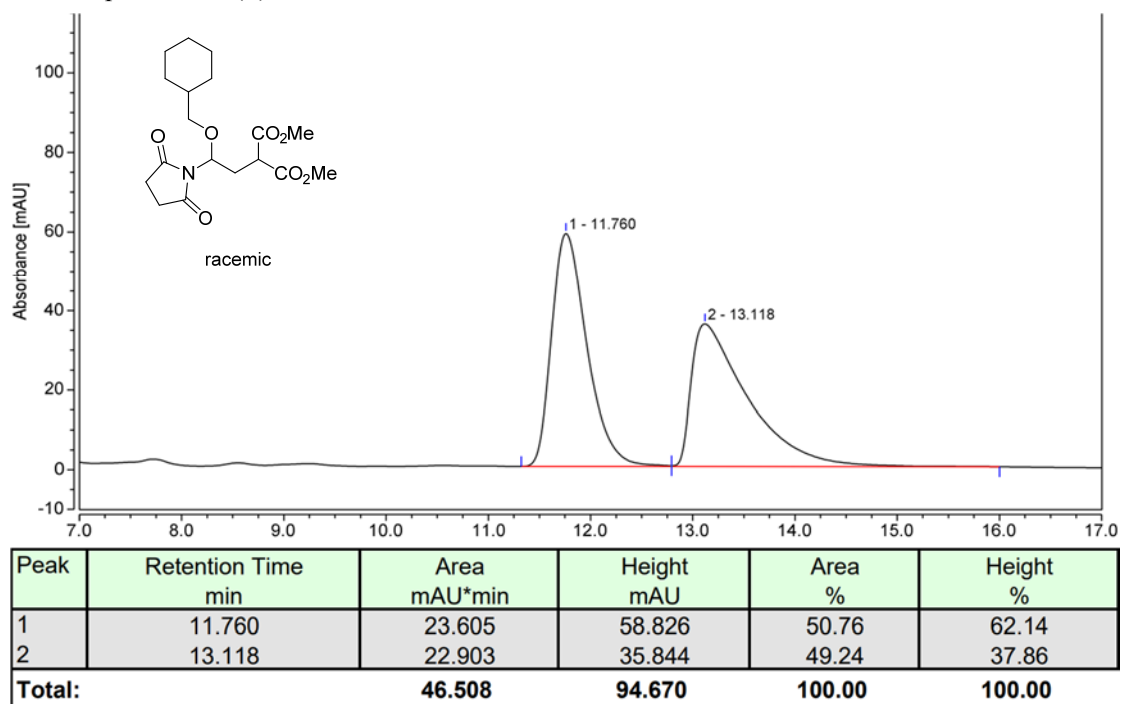

### HPLC Spectrum of (S)-3as

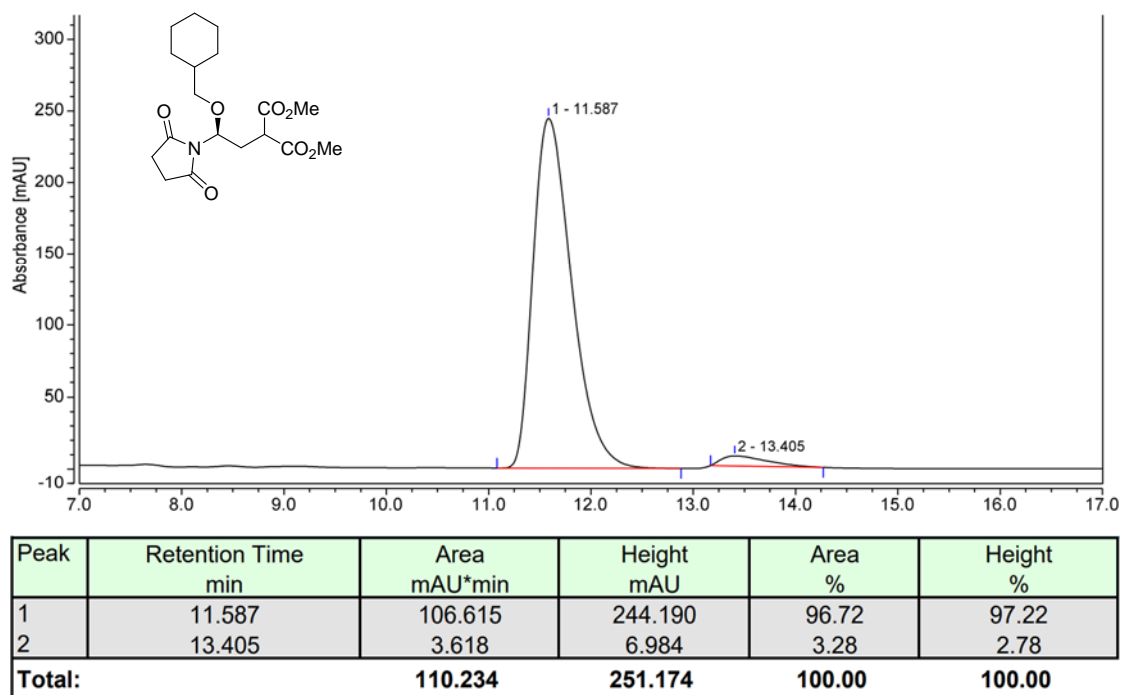

### HPLC Spectrum for the mixture of **3at** and **3at'**

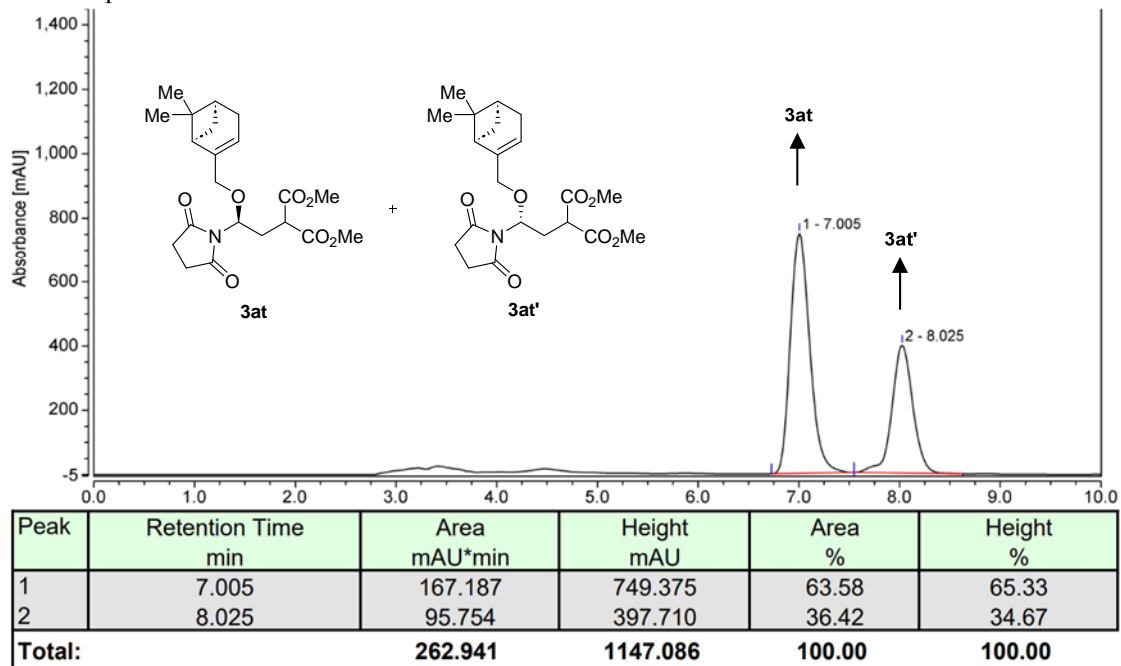

### HPLC Spectrum of (*S*, 1*R*, 5*S*)-**3at**

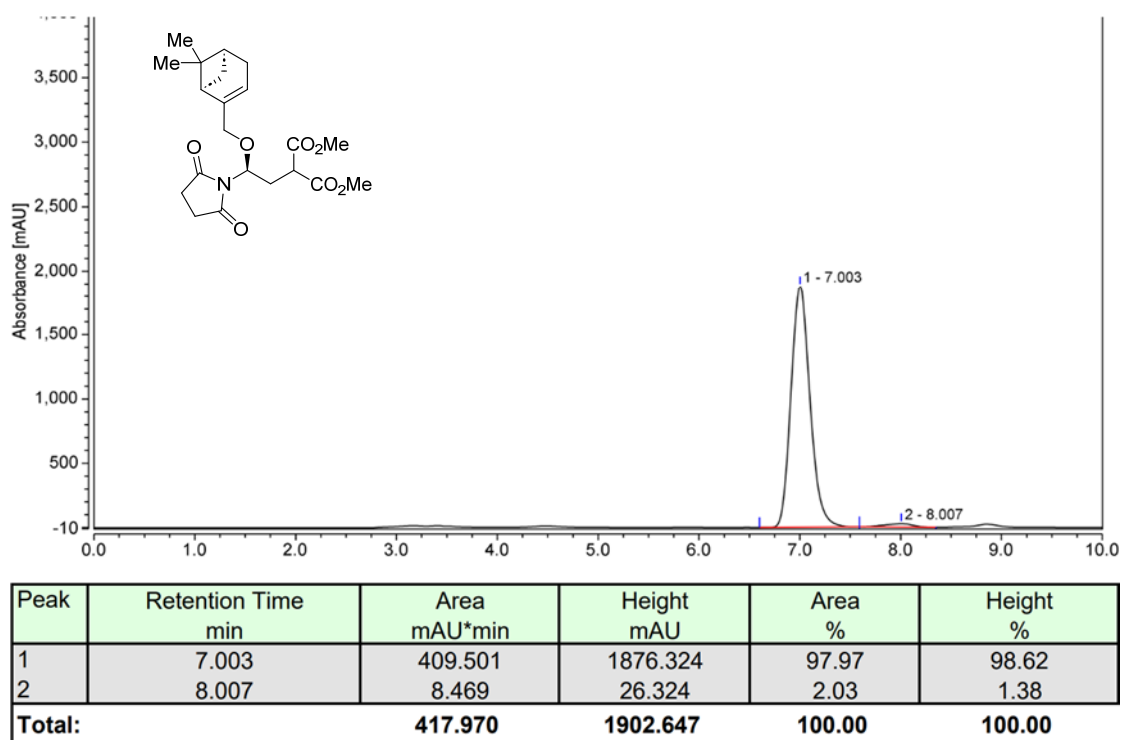



### HPLC Spectrum of (*R*, 1*R*, 5*S*)-**3at**'

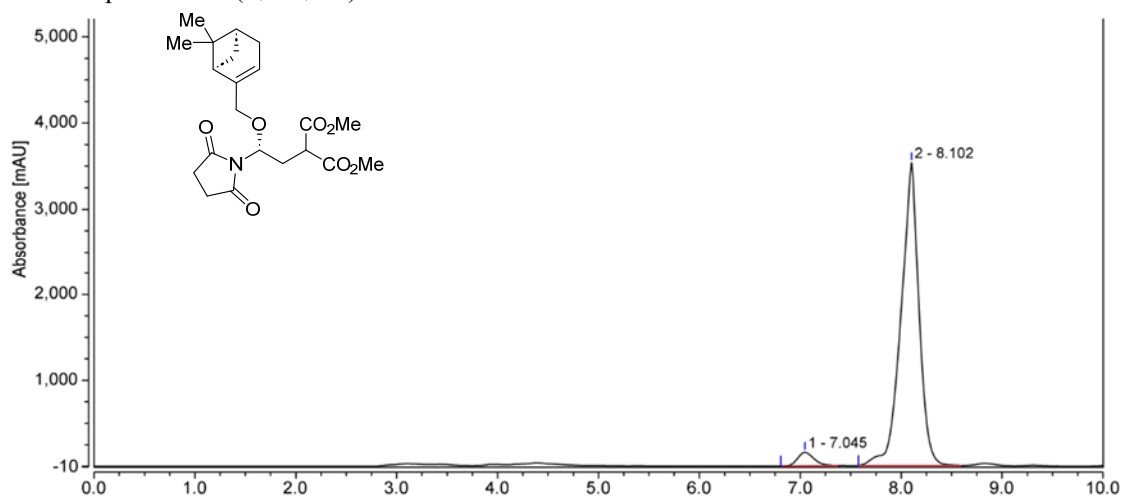

| Peak          | Retention Time<br>min | Area<br>mAU*min | Height<br>mAU   | Area<br>%     | Height<br>%   |
|---------------|-----------------------|-----------------|-----------------|---------------|---------------|
| 1             | 7.045                 | 28.965          | 156.823         | 3.83          | 4.25          |
| 2             | 8.102                 | 727.550         | 3532.511        | 96.17         | 95.75         |
| <b>Total:</b> |                       | <b>756.515</b>  | <b>3689.334</b> | <b>100.00</b> | <b>100.00</b> |

HPLC Spectrum for the mixture of **3au** and **3au'**

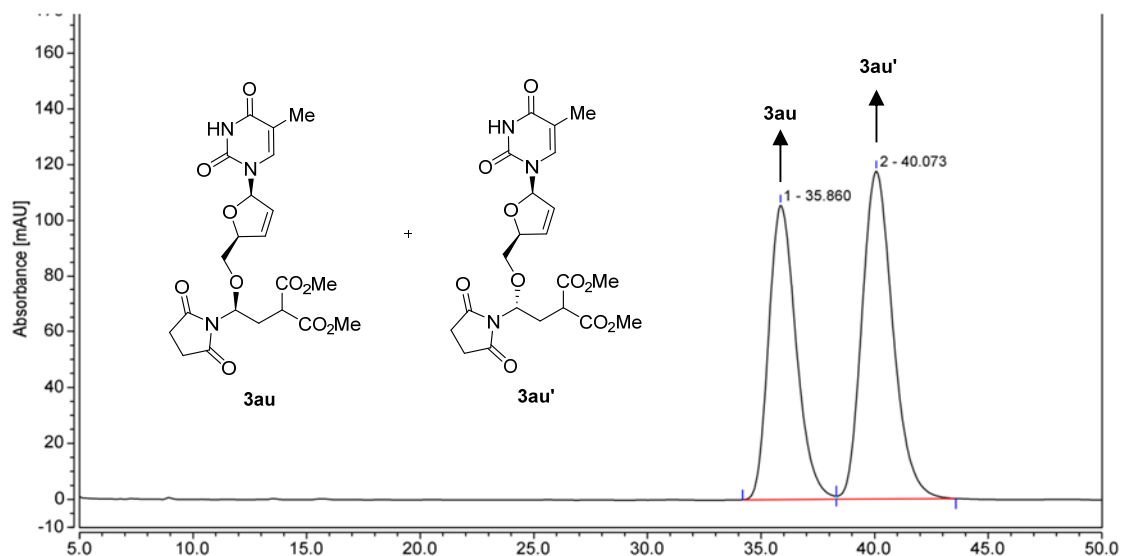

| Peak          | Retention Time<br>min | Area<br>mAU*min | Height<br>mAU  | Area<br>%     | Height<br>%   |
|---------------|-----------------------|-----------------|----------------|---------------|---------------|
| 1             | 35.860                | 147.625         | 105.646        | 44.45         | 47.31         |
| 2             | 40.073                | 184.522         | 117.679        | 55.55         | 52.69         |
| <b>Total:</b> |                       | <b>332.146</b>  | <b>223.325</b> | <b>100.00</b> | <b>100.00</b> |

HPLC Spectrum of (*S*, 2*S*, 5*R*)-**3au**

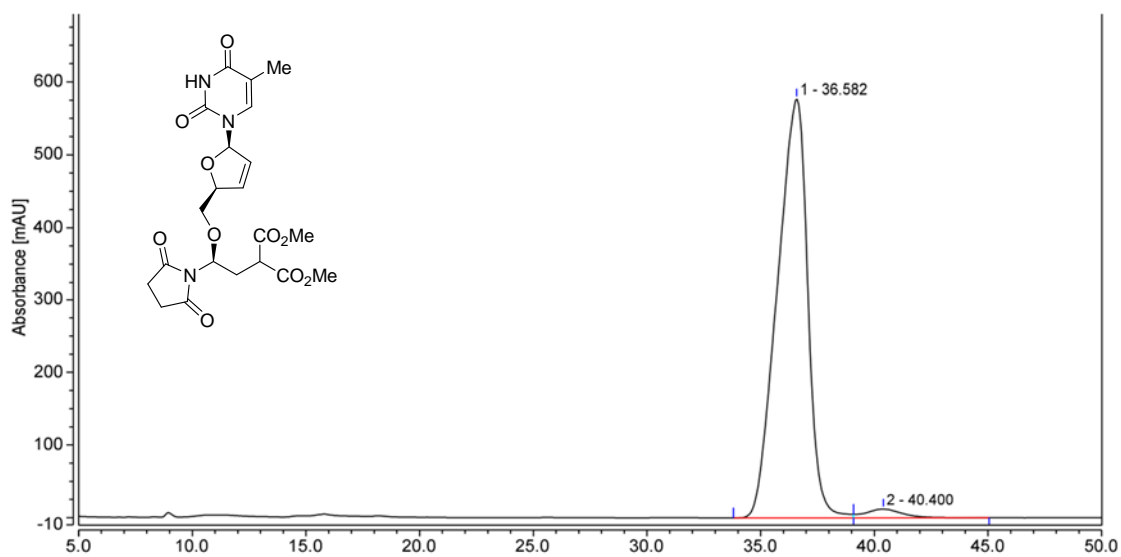

| Peak          | Retention Time<br>min | Area<br>mAU*min | Height<br>mAU  | Area<br>%     | Height<br>%   |
|---------------|-----------------------|-----------------|----------------|---------------|---------------|
| 1             | 36.582                | 889.357         | 576.893        | 97.57         | 97.99         |
| 2             | 40.400                | 22.142          | 11.824         | 2.43          | 2.01          |
| <b>Total:</b> |                       | <b>911.499</b>  | <b>588.717</b> | <b>100.00</b> | <b>100.00</b> |

HPLC Spectrum of (*R*, 2*S*, 5*R*)-**3au**'

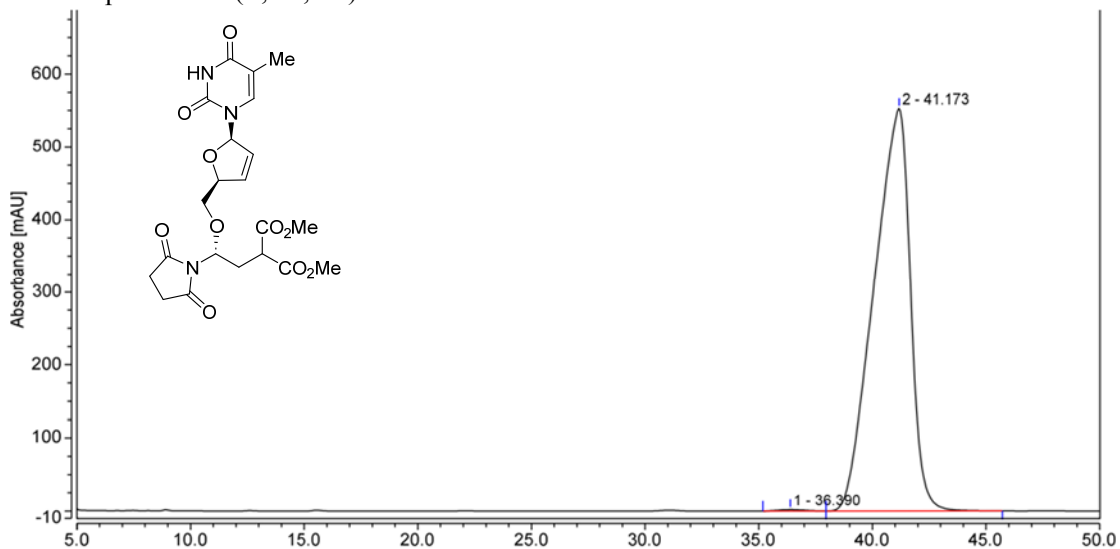

| Peak          | Retention Time<br>min | Area<br>mAU*min | Height<br>mAU  | Area<br>%     | Height<br>%   |
|---------------|-----------------------|-----------------|----------------|---------------|---------------|
| 1             | 36.390                | 2.543           | 1.880          | 0.25          | 0.34          |
| 2             | 41.173                | 1019.635        | 552.814        | 99.75         | 99.66         |
| <b>Total:</b> |                       | <b>1022.178</b> | <b>554.694</b> | <b>100.00</b> | <b>100.00</b> |

### HPLC Spectrum of (±)-3av

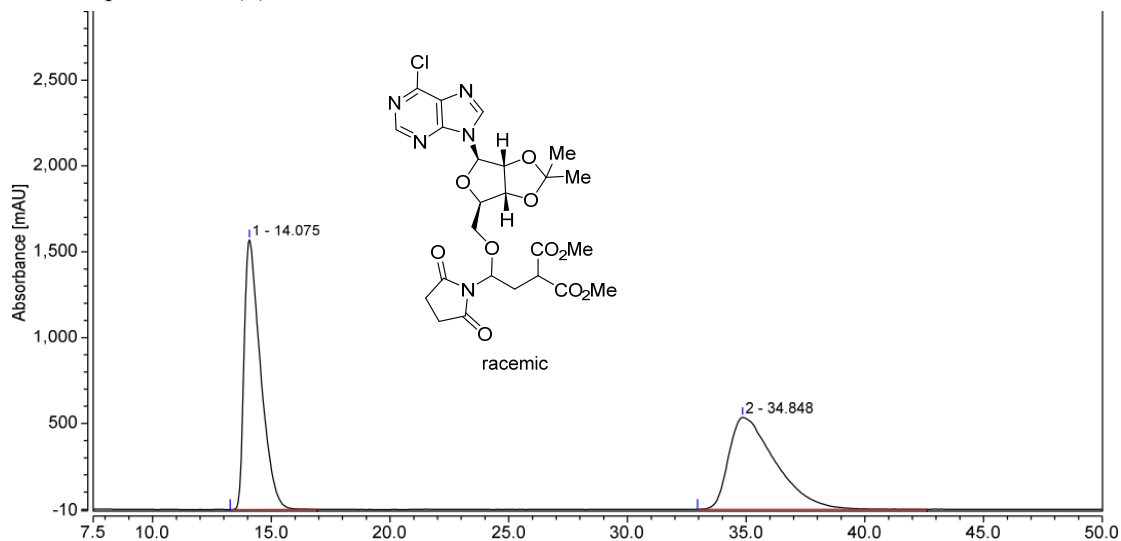

| Peak          | Retention Time<br>min | Area<br>mAU*min | Height<br>mAU   | Area<br>%     | Height<br>%   |
|---------------|-----------------------|-----------------|-----------------|---------------|---------------|
| 1             | 14.075                | 1257.438        | 1569.705        | 50.88         | 74.57         |
| 2             | 34.848                | 1213.890        | 535.415         | 49.12         | 25.43         |
| <b>Total:</b> |                       | <b>2471.328</b> | <b>2105.120</b> | <b>100.00</b> | <b>100.00</b> |

### HPLC Spectrum of (*S*, 3*aR*, 4*R*, 6*R*, 6*aR*)-3av

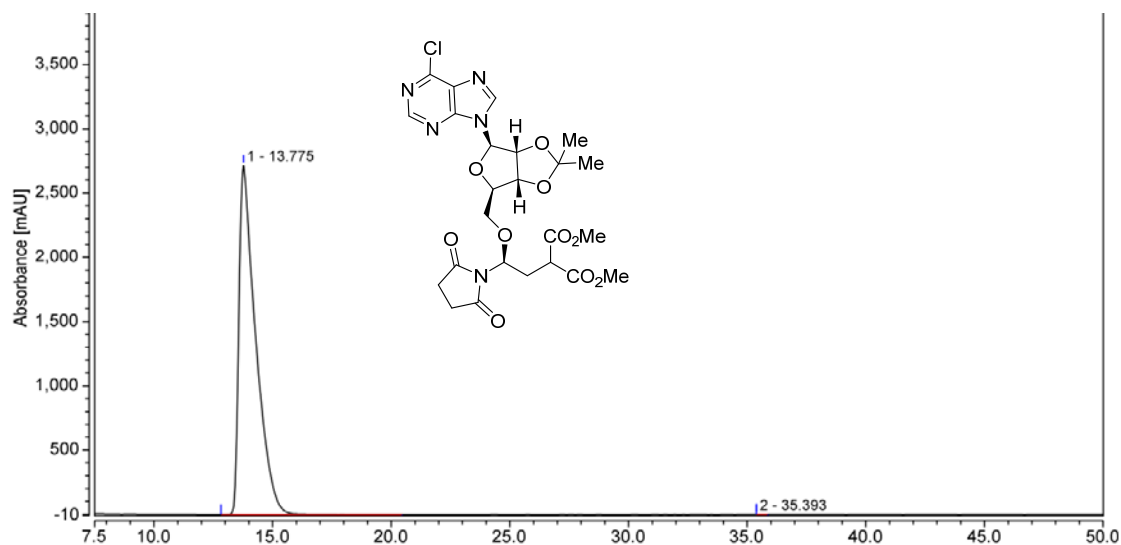

| Peak          | Retention Time<br>min | Area<br>mAU*min | Height<br>mAU   | Area<br>%     | Height<br>%   |
|---------------|-----------------------|-----------------|-----------------|---------------|---------------|
| 1             | 13.775                | 2215.293        | 2715.555        | 100.00        | 100.00        |
| 2             | 35.393                | 0.014           | 0.002           | 0.00          | 0.00          |
| <b>Total:</b> |                       | <b>2215.307</b> | <b>2715.556</b> | <b>100.00</b> | <b>100.00</b> |

HPLC Spectrum of (*R*, 3*aR*, 4*R*, 6*R*, 6*aR*)-**3av**?

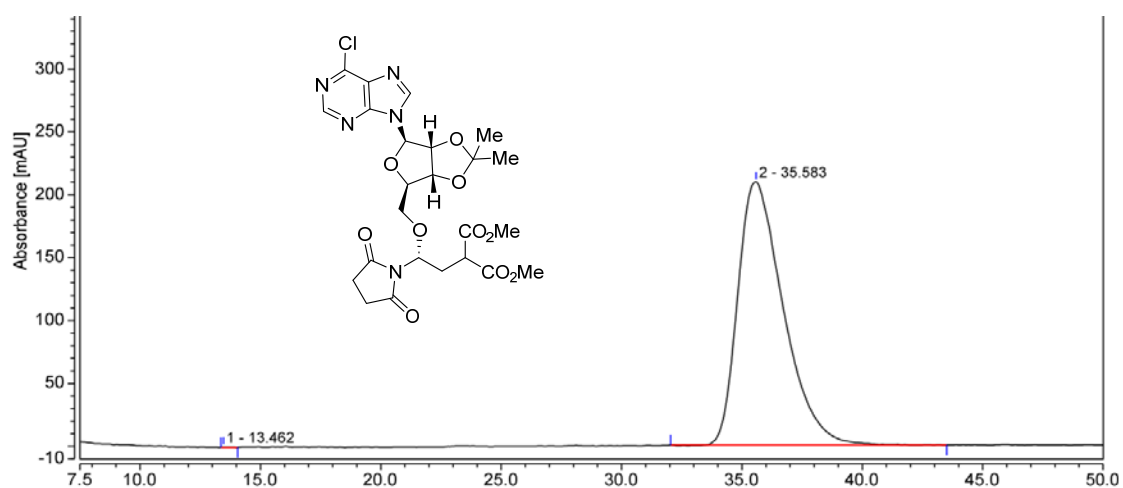

| Peak          | Retention Time<br>min | Area<br>mAU*min | Height<br>mAU  | Area<br>%     | Height<br>%   |
|---------------|-----------------------|-----------------|----------------|---------------|---------------|
| 1             | 13.462                | 0.079           | 0.202          | 0.02          | 0.10          |
| 2             | 35.583                | 458.041         | 209.353        | 99.98         | 99.90         |
| <b>Total:</b> |                       | <b>458.120</b>  | <b>209.555</b> | <b>100.00</b> | <b>100.00</b> |

### HPLC Spectrum of (±)-3ba

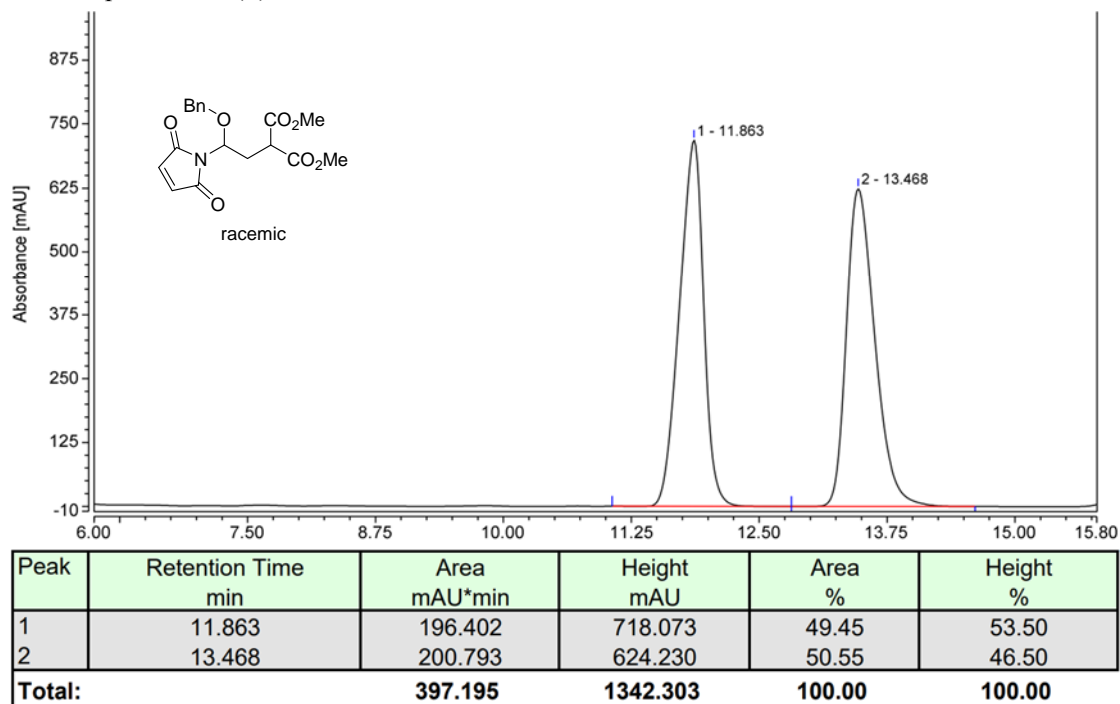

### HPLC Spectrum of (S)-3ba

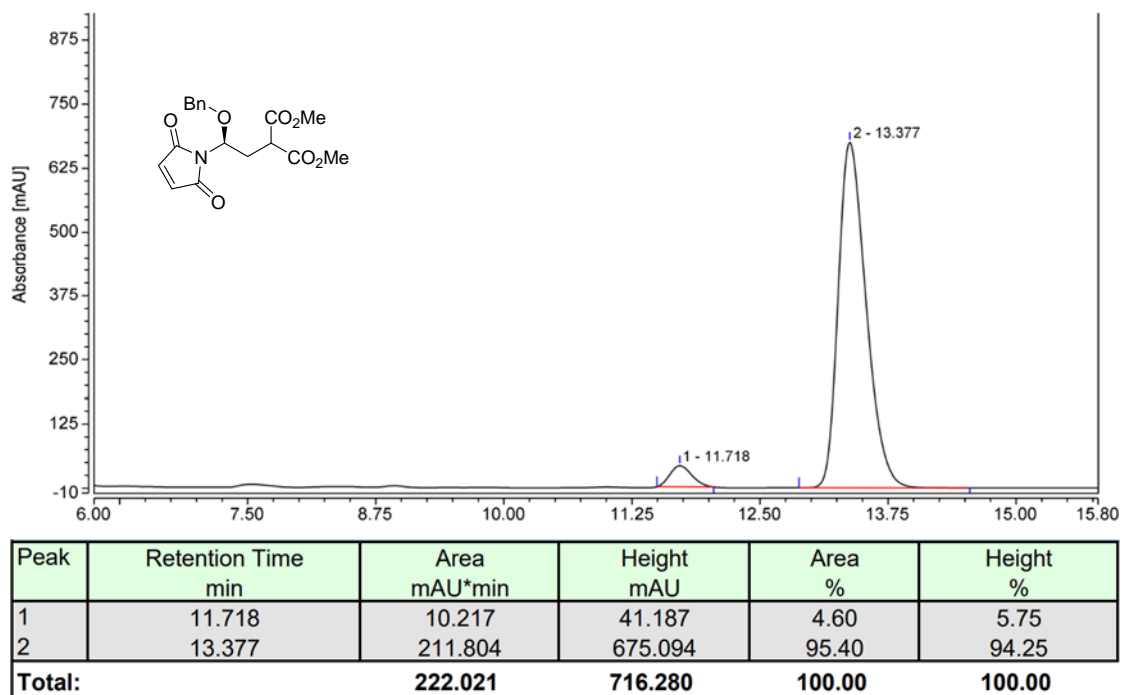

### HPLC Spectrum of (±)-3ca

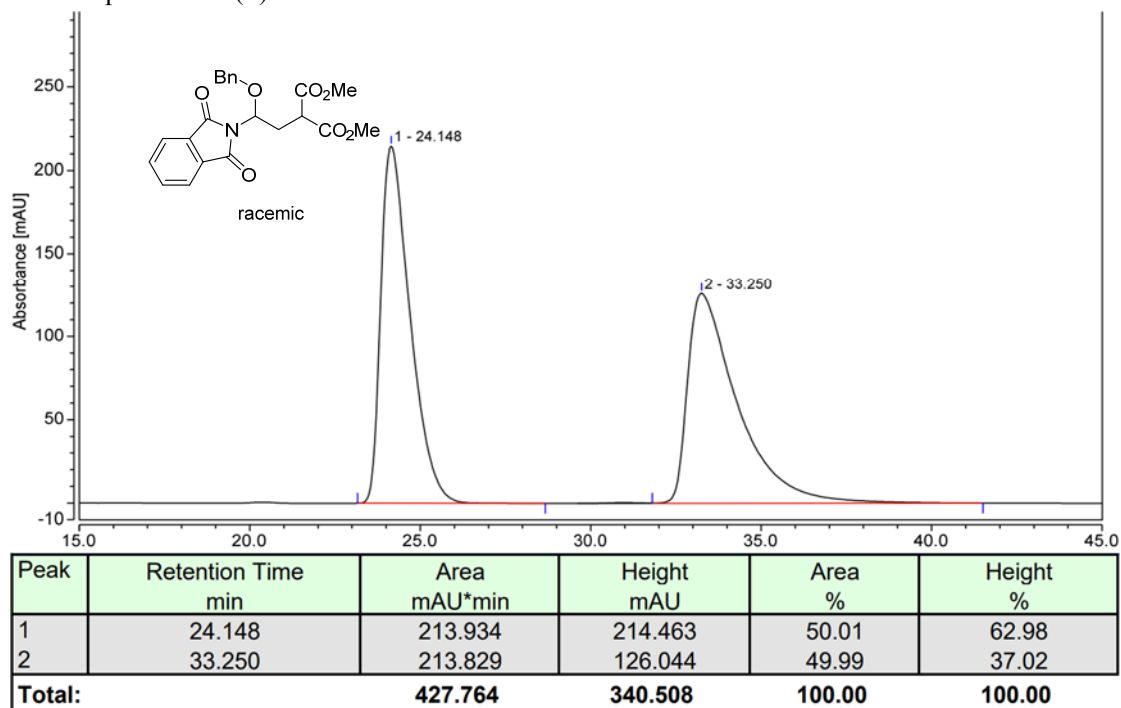

### HPLC Spectrum of (S)-3ca

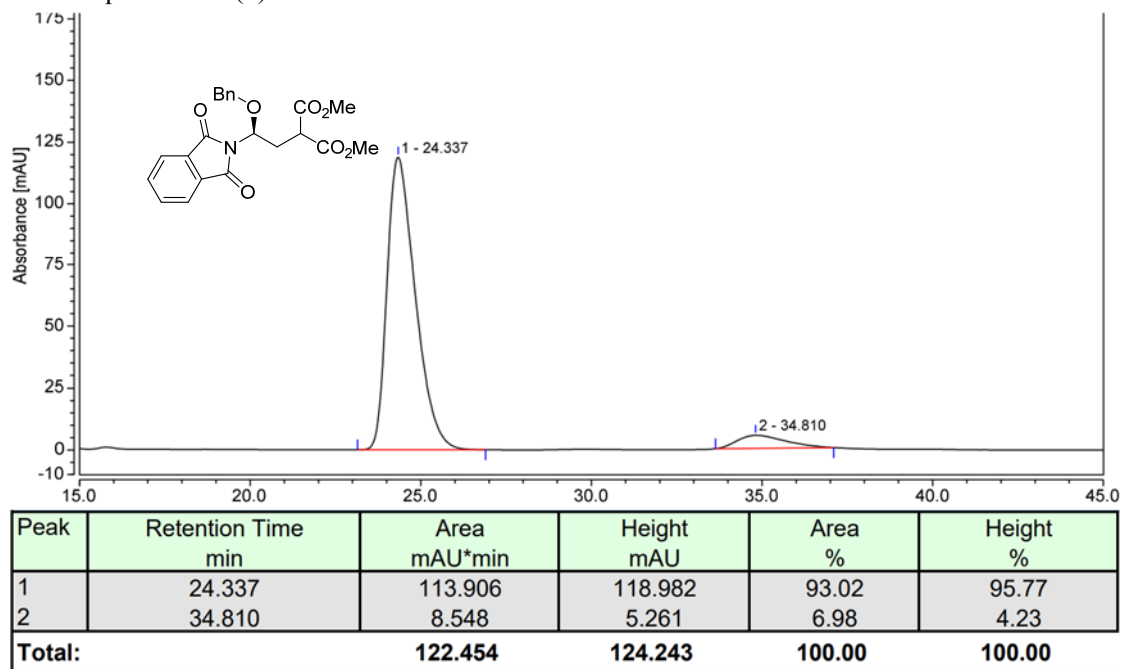

### HPLC Spectrum of (±)-3da

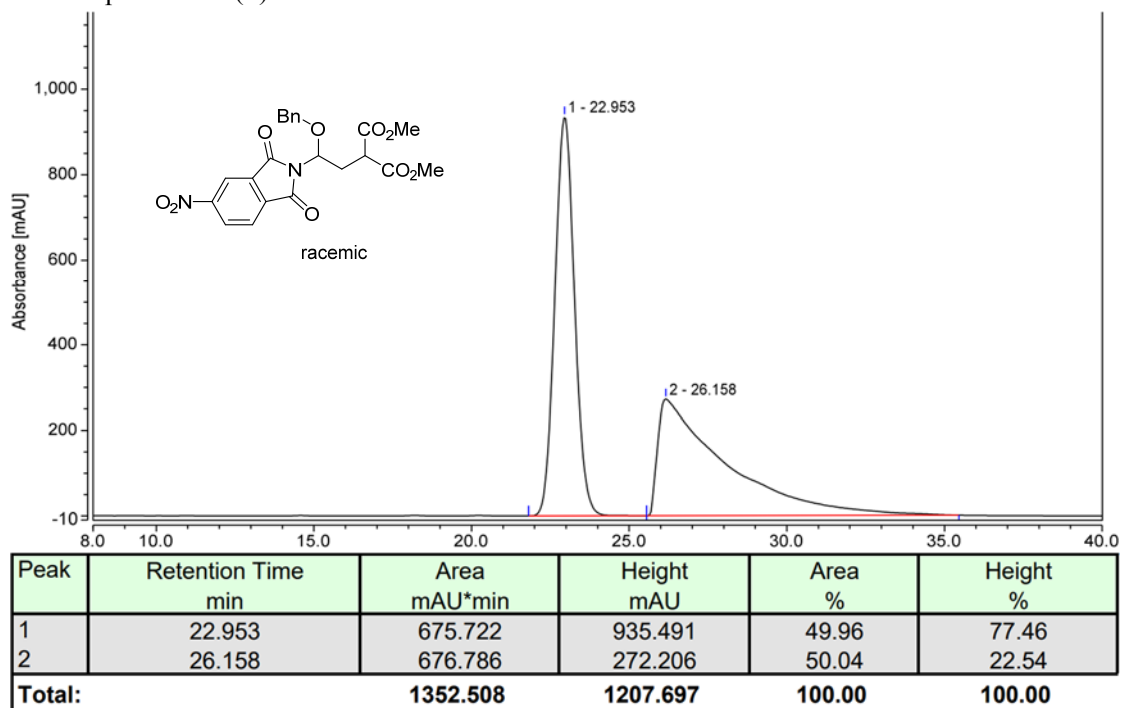

### HPLC Spectrum of (S)-3da

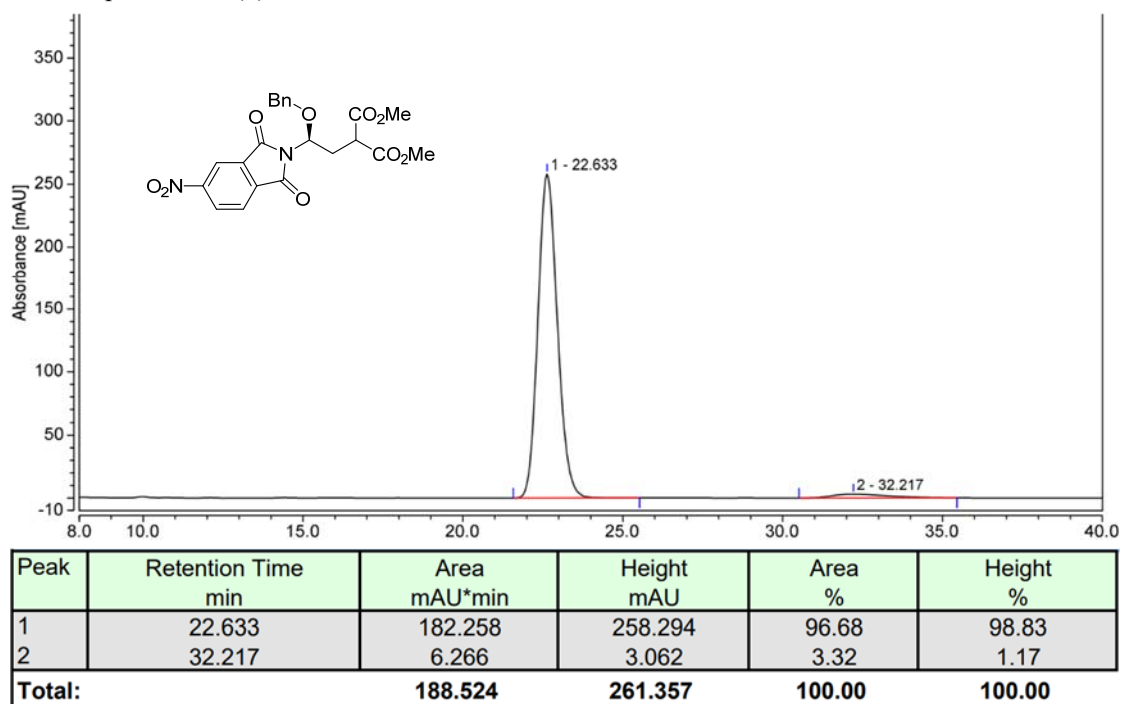



### HPLC Spectrum of (±)-3ea

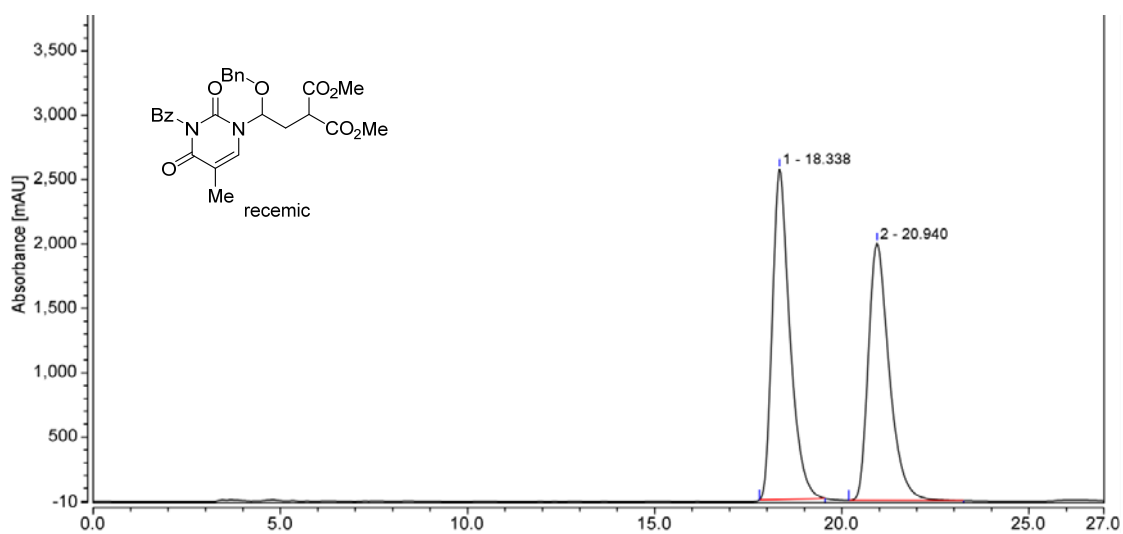

| Peak          | Retention Time min | Area mAU*min    | Height mAU      | Area %        | Height %      |
|---------------|--------------------|-----------------|-----------------|---------------|---------------|
| 1             | 18.338             | 1392.359        | 2568.448        | 51.89         | 56.22         |
| 2             | 20.940             | 1291.037        | 2000.224        | 48.11         | 43.78         |
| <b>Total:</b> |                    | <b>2683.396</b> | <b>4568.672</b> | <b>100.00</b> | <b>100.00</b> |

### HPLC Spectrum of (S)-3ea

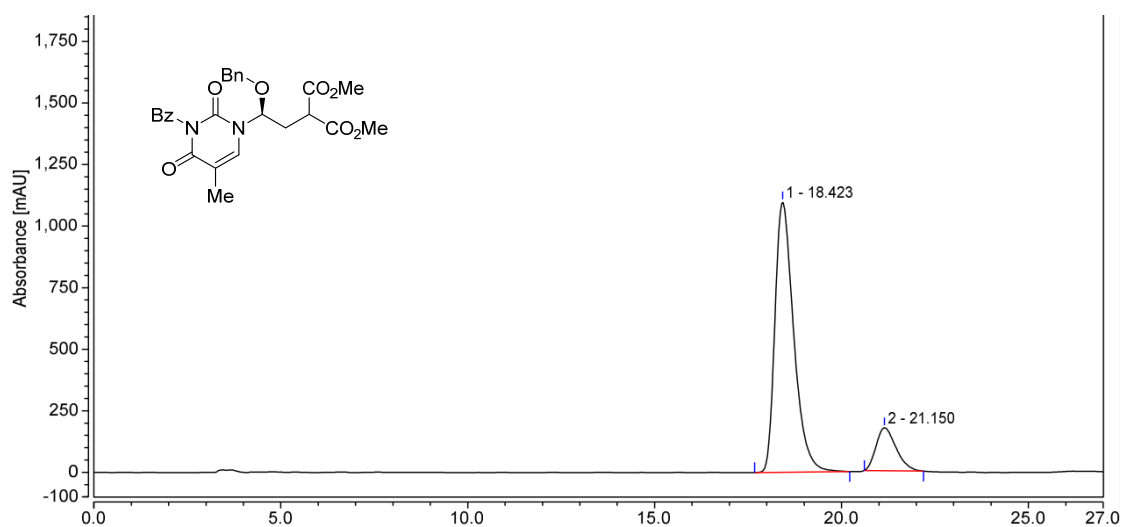

| Peak          | Retention Time min | Area mAU*min   | Height mAU      | Area %        | Height %      |
|---------------|--------------------|----------------|-----------------|---------------|---------------|
| 1             | 18.423             | 637.871        | 1098.539        | 85.48         | 86.30         |
| 2             | 21.150             | 108.333        | 174.431         | 14.52         | 13.70         |
| <b>Total:</b> |                    | <b>746.204</b> | <b>1272.971</b> | <b>100.00</b> | <b>100.00</b> |

### HPLC Spectrum of (±)-5aa

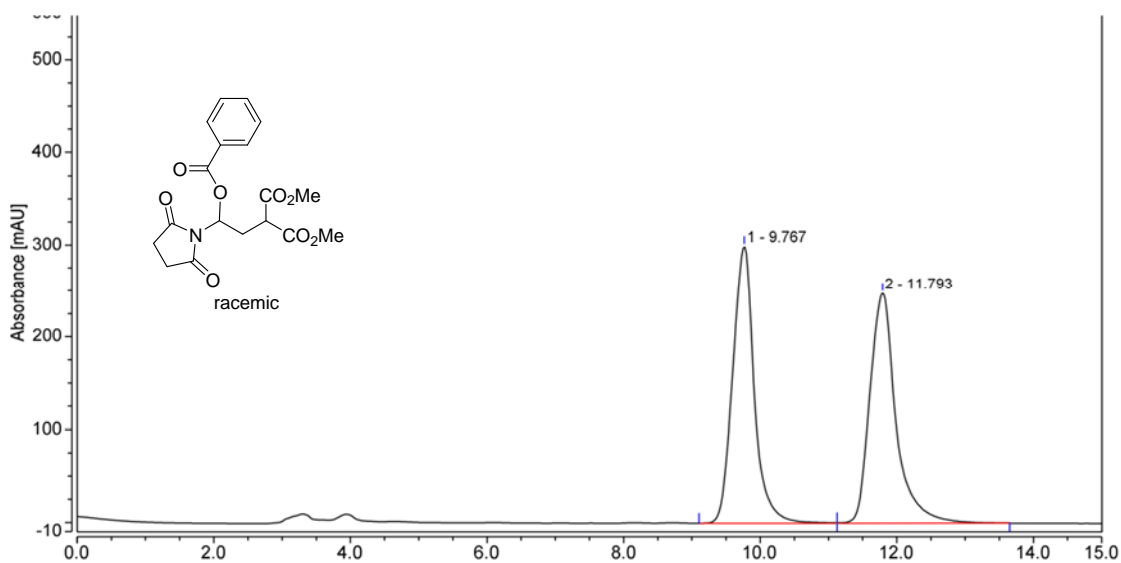

| Peak          | Retention Time<br>min | Area<br>mAU*min | Height<br>mAU  | Area<br>%     | Height<br>%   |
|---------------|-----------------------|-----------------|----------------|---------------|---------------|
| 1             | 9.767                 | 109.473         | 299.279        | 49.93         | 54.67         |
| 2             | 11.793                | 109.791         | 248.119        | 50.07         | 45.33         |
| <b>Total:</b> |                       | <b>219.265</b>  | <b>547.399</b> | <b>100.00</b> | <b>100.00</b> |

### HPLC Spectrum of (S)-5aa

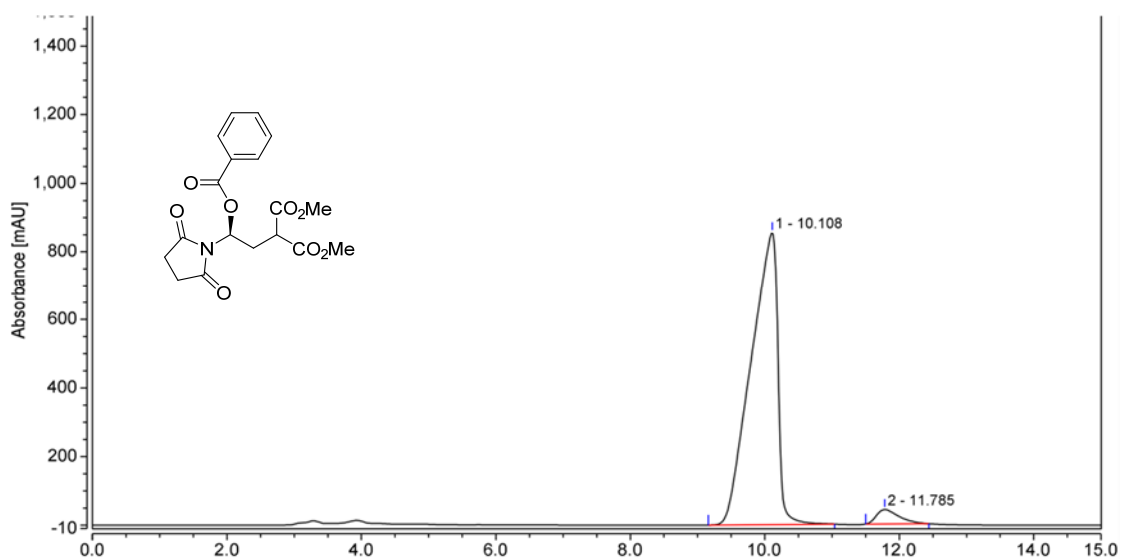

| Peak          | Retention Time<br>min | Area<br>mAU*min | Height<br>mAU  | Area<br>%     | Height<br>%   |
|---------------|-----------------------|-----------------|----------------|---------------|---------------|
| 1             | 10.108                | 393.022         | 854.344        | 96.00         | 95.32         |
| 2             | 11.785                | 16.388          | 41.924         | 4.00          | 4.68          |
| <b>Total:</b> |                       | <b>409.410</b>  | <b>896.268</b> | <b>100.00</b> | <b>100.00</b> |

### HPLC Spectrum of (±)-5ab

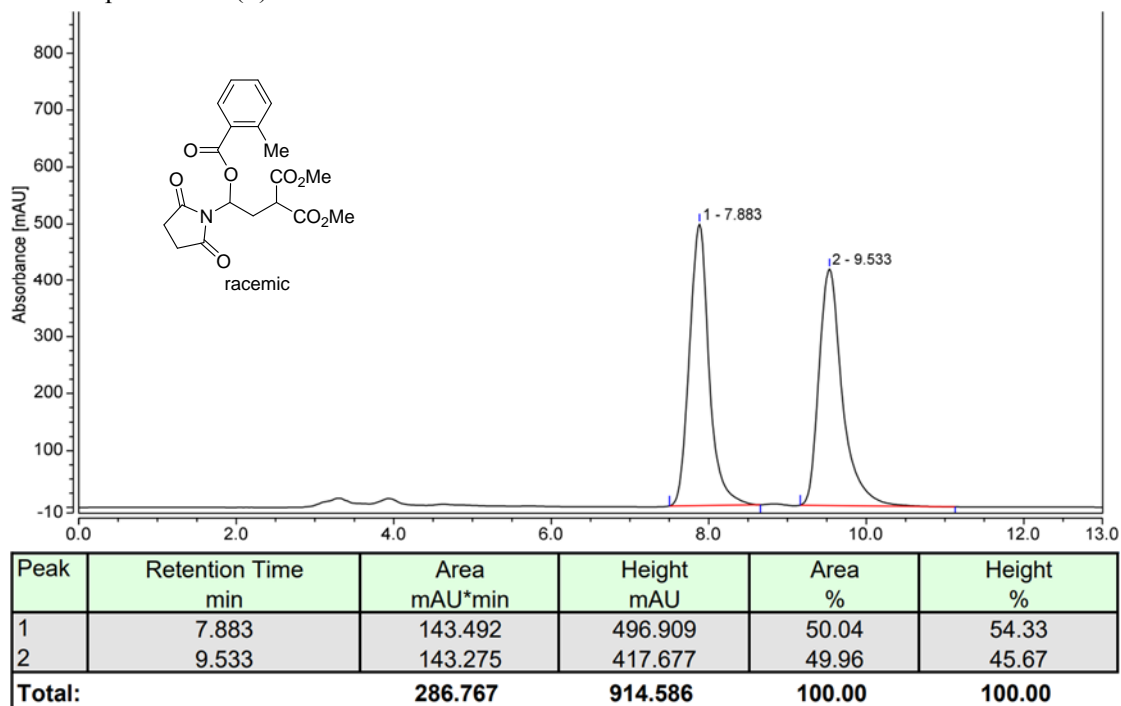

### HPLC Spectrum of (S)-5ab

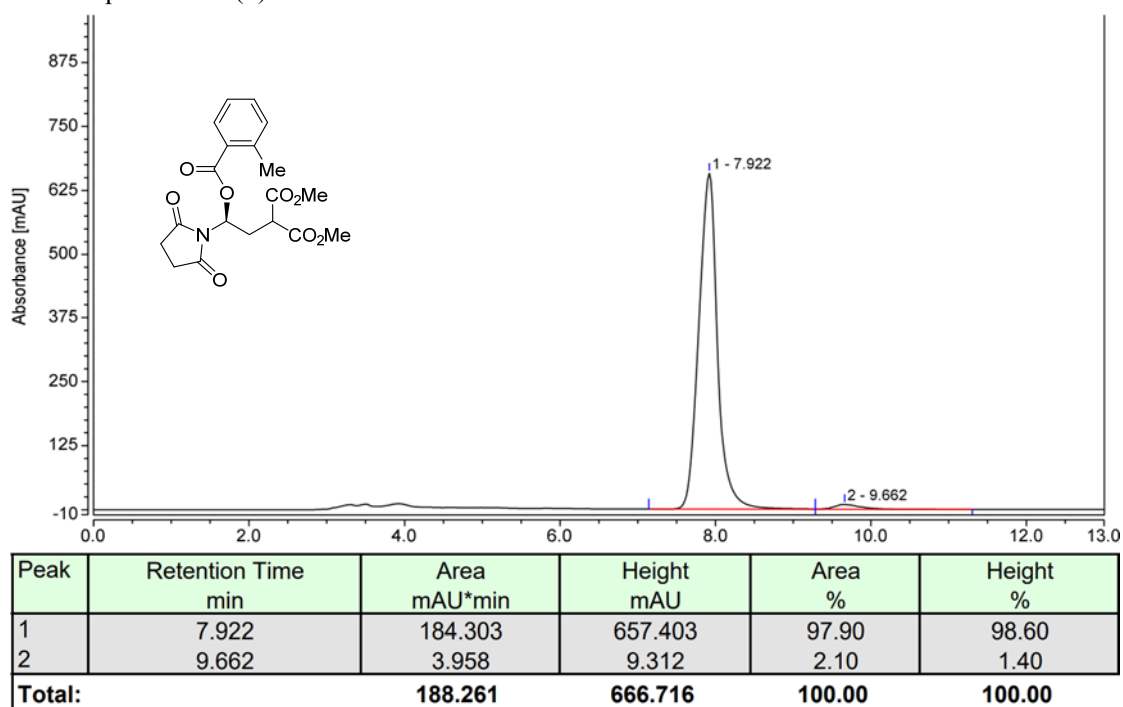

### HPLC Spectrum of (±)-5ac

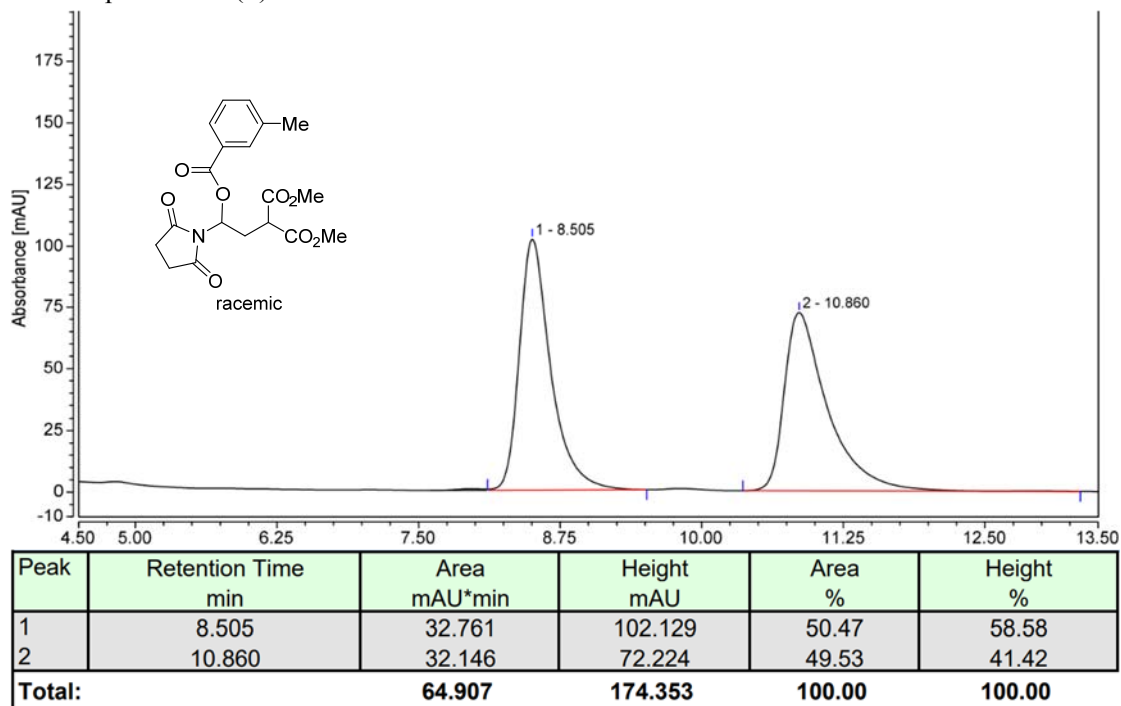

### HPLC Spectrum of (S)-5ac

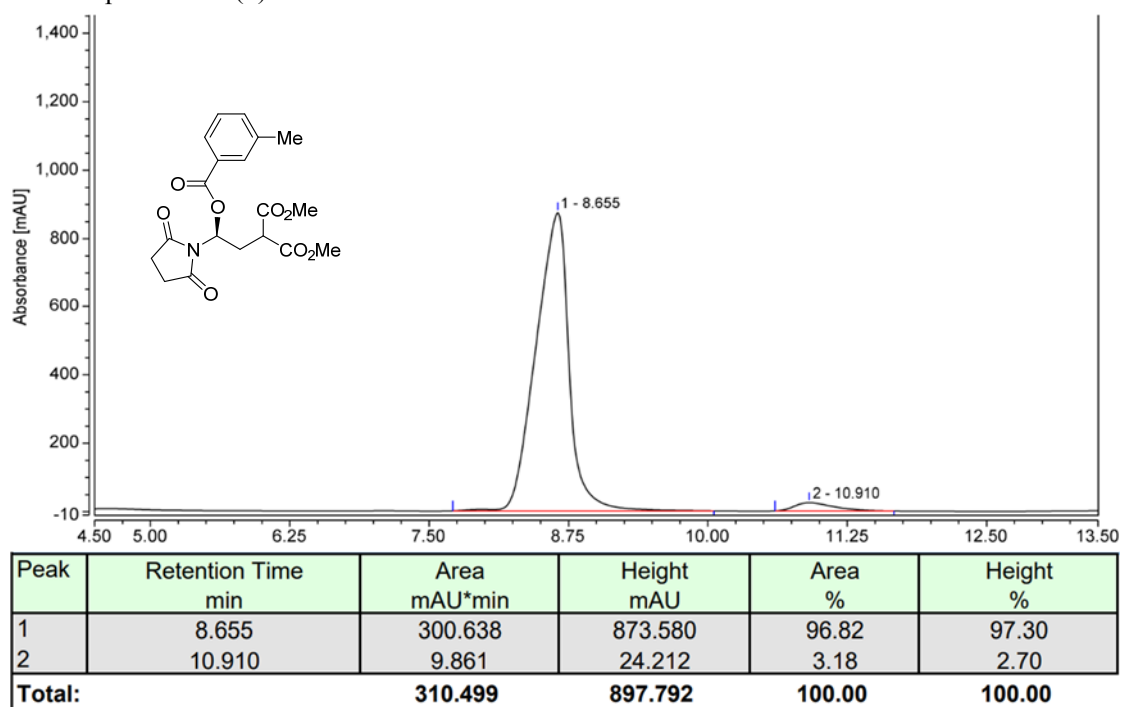

### HPLC Spectrum of (±)-5ad

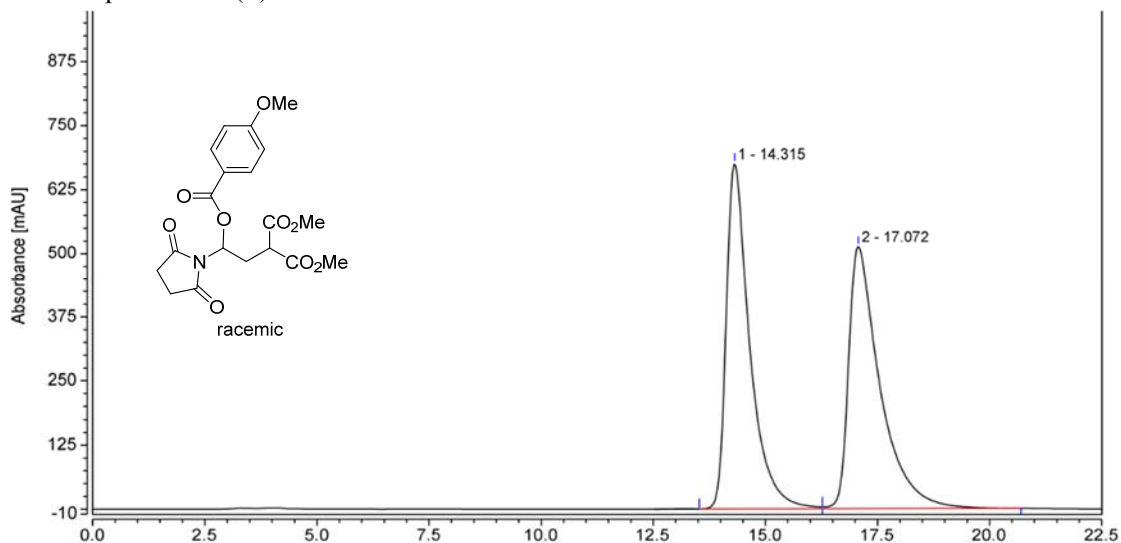

| Peak          | Retention Time<br>min | Area<br>mAU*min | Height<br>mAU   | Area<br>%     | Height<br>%   |
|---------------|-----------------------|-----------------|-----------------|---------------|---------------|
| 1             | 14.315                | 411.803         | 675.637         | 49.80         | 56.81         |
| 2             | 17.072                | 415.152         | 513.630         | 50.20         | 43.19         |
| <b>Total:</b> |                       | <b>826.954</b>  | <b>1189.268</b> | <b>100.00</b> | <b>100.00</b> |

### HPLC Spectrum of (S)-5ad

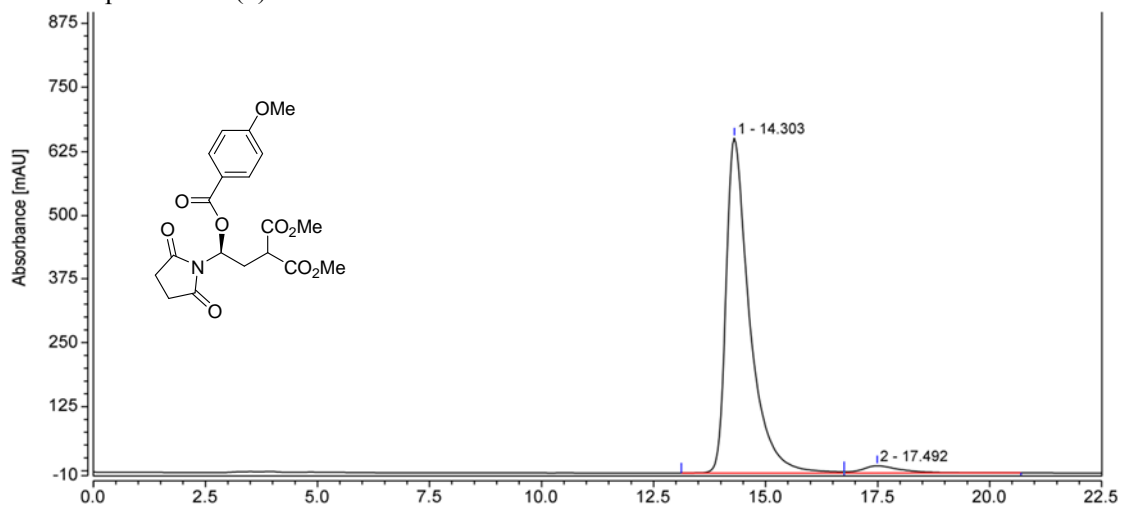

| Peak          | Retention Time<br>min | Area<br>mAU*min | Height<br>mAU  | Area<br>%     | Height<br>%   |
|---------------|-----------------------|-----------------|----------------|---------------|---------------|
| 1             | 14.303                | 398.799         | 654.861        | 96.60         | 97.92         |
| 2             | 17.492                | 14.023          | 13.891         | 3.40          | 2.08          |
| <b>Total:</b> |                       | <b>412.822</b>  | <b>668.752</b> | <b>100.00</b> | <b>100.00</b> |

### HPLC Spectrum of (±)-5ae

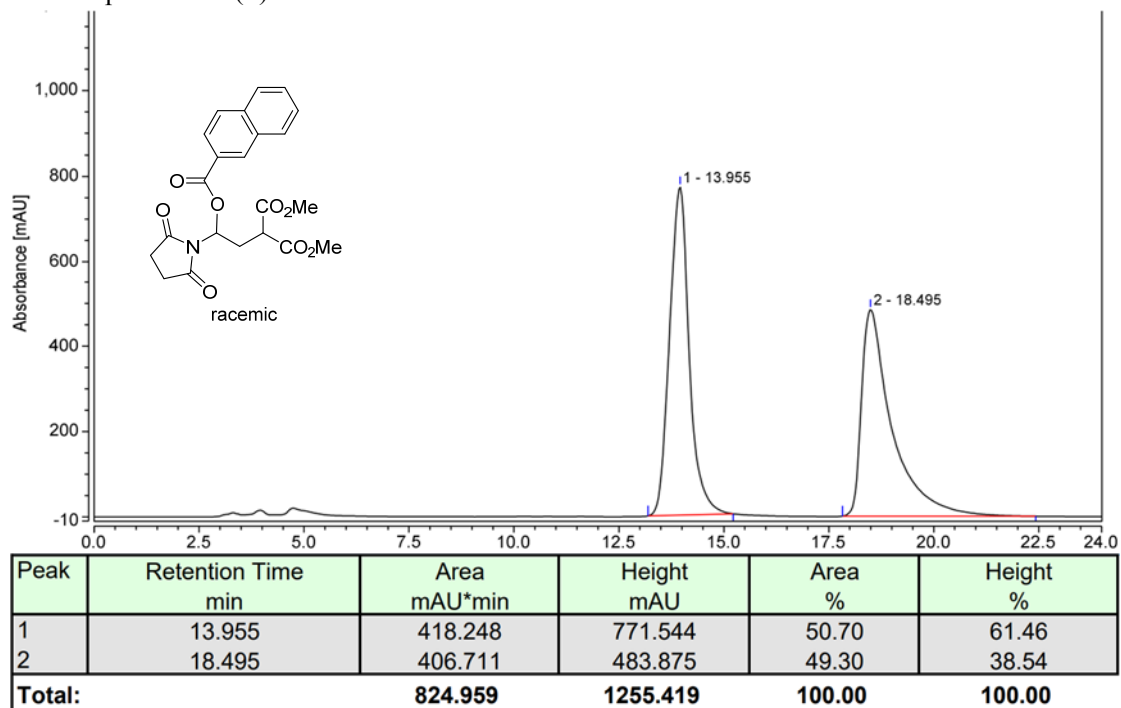

### HPLC Spectrum of (S)-5ae

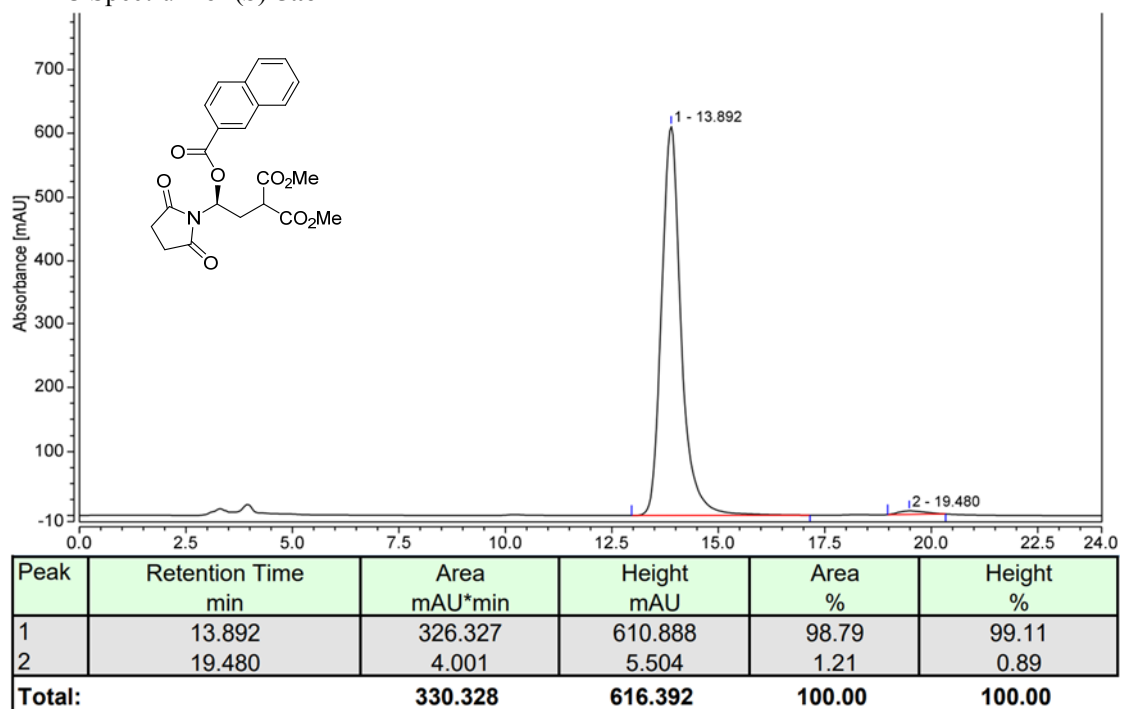

### HPLC Spectrum of (±)-5af

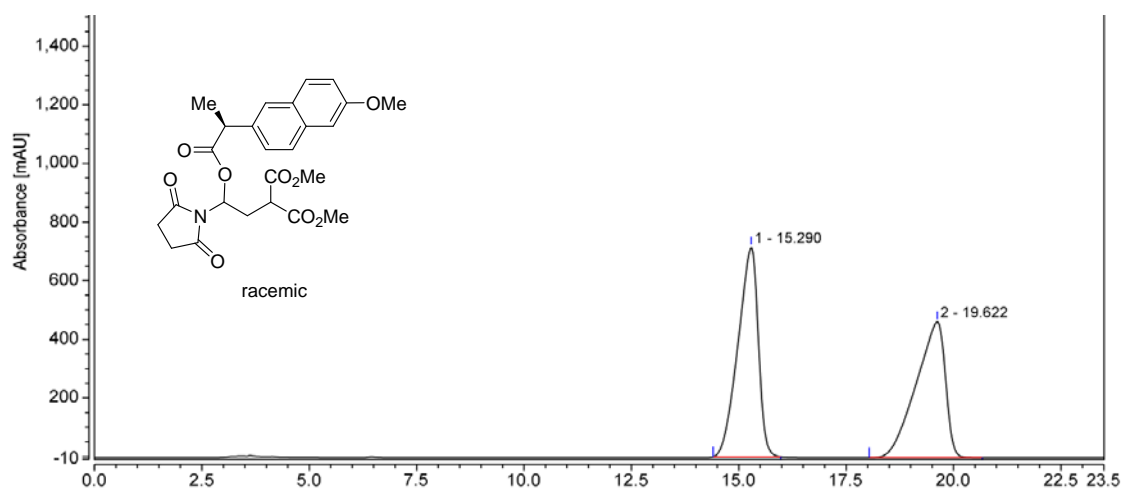

| Peak          | Retention Time<br>min | Area<br>mAU*min | Height<br>mAU   | Area<br>%     | Height<br>%   |
|---------------|-----------------------|-----------------|-----------------|---------------|---------------|
| 1             | 15.290                | 390.642         | 715.218         | 51.65         | 60.65         |
| 2             | 19.622                | 365.702         | 464.017         | 48.35         | 39.35         |
| <b>Total:</b> |                       | <b>756.343</b>  | <b>1179.236</b> | <b>100.00</b> | <b>100.00</b> |

### HPLC Spectrum of (S,S)-5af

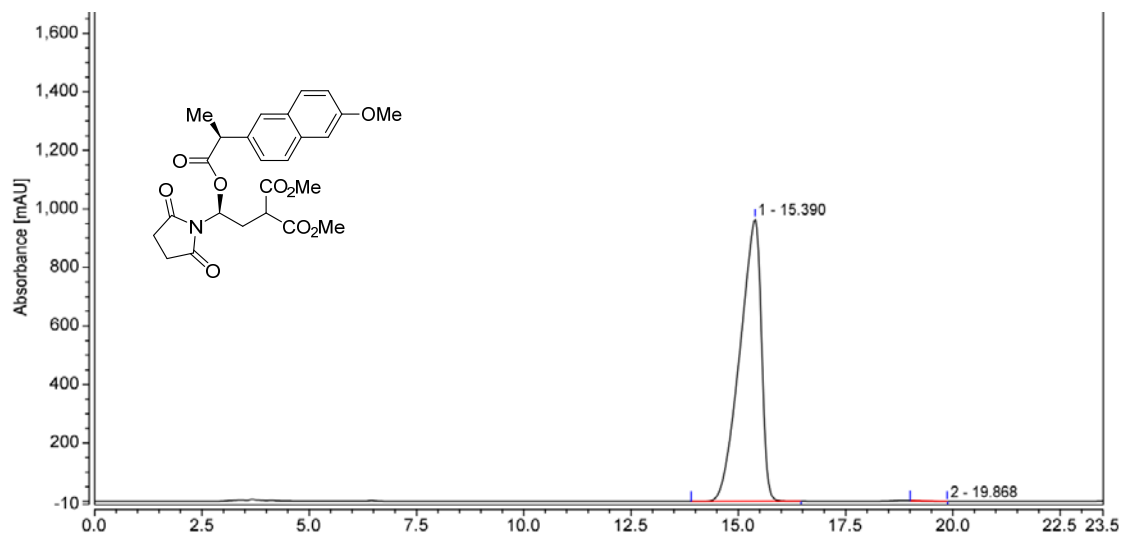

| Peak          | Retention Time<br>min | Area<br>mAU*min | Height<br>mAU  | Area<br>%     | Height<br>%   |
|---------------|-----------------------|-----------------|----------------|---------------|---------------|
| 1             | 15.390                | 555.933         | 964.693        | 99.91         | 100.00        |
| 2             | 19.868                | 0.475           | 0.040          | 0.09          | 0.00          |
| <b>Total:</b> |                       | <b>556.408</b>  | <b>964.734</b> | <b>100.00</b> | <b>100.00</b> |

### HPLC Spectrum of (R, S)-5af'

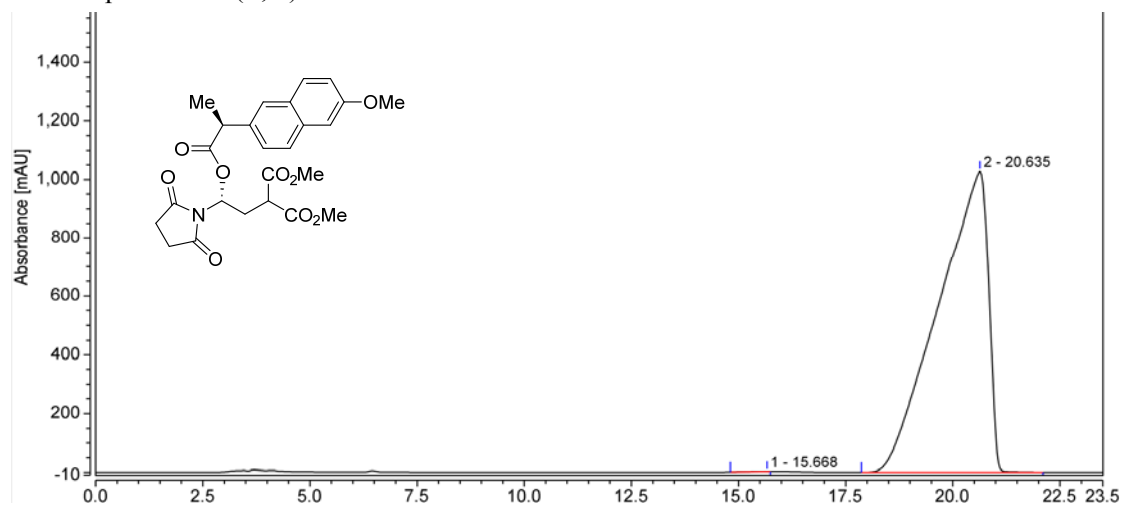

| Peak          | Retention Time<br>min | Area<br>mAU*min | Height<br>mAU   | Area<br>%     | Height<br>%   |
|---------------|-----------------------|-----------------|-----------------|---------------|---------------|
| 1             | 15.668                | 0.214           | 0.196           | 0.02          | 0.02          |
| 2             | 20.635                | 1375.984        | 1027.453        | 99.98         | 99.98         |
| <b>Total:</b> |                       | <b>1376.198</b> | <b>1027.650</b> | <b>100.00</b> | <b>100.00</b> |



### HPLC Spectrum of (±)-7aa

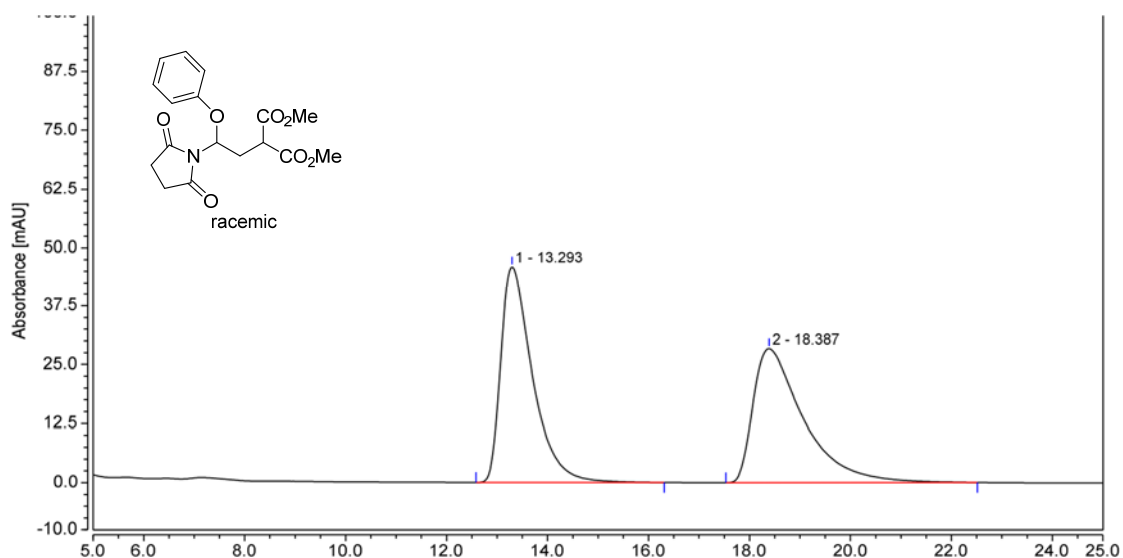

| Peak          | Retention Time<br>min | Area<br>mAU*min | Height<br>mAU | Area<br>%     | Height<br>%   |
|---------------|-----------------------|-----------------|---------------|---------------|---------------|
| 1             | 13.293                | 33.331          | 45.892        | 50.38         | 61.82         |
| 2             | 18.387                | 32.825          | 28.337        | 49.62         | 38.18         |
| <b>Total:</b> |                       | <b>66.156</b>   | <b>74.229</b> | <b>100.00</b> | <b>100.00</b> |

### HPLC Spectrum of *R*-7aa

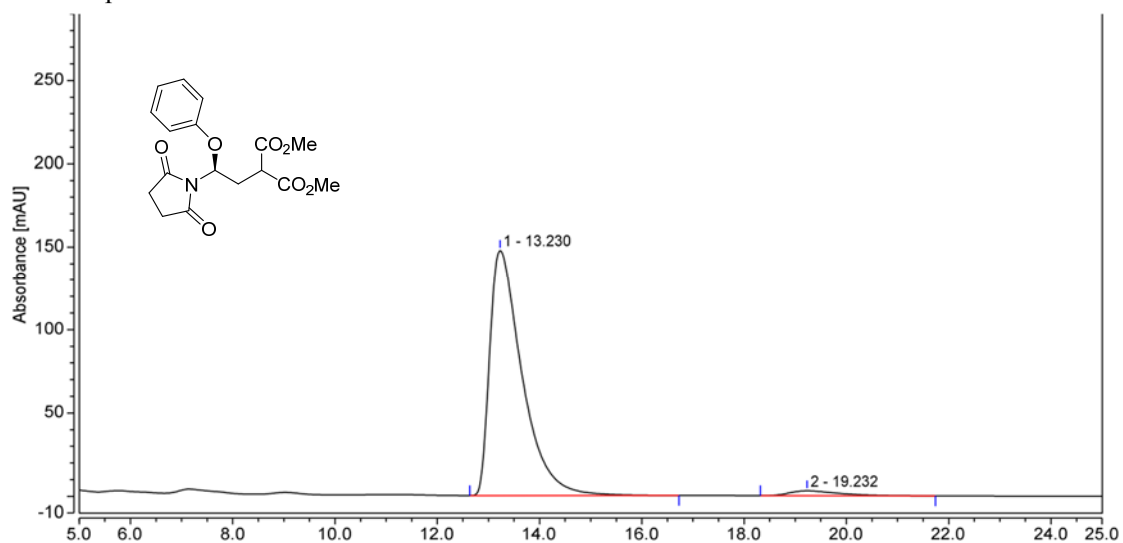

| Peak          | Retention Time<br>min | Area<br>mAU*min | Height<br>mAU  | Area<br>%     | Height<br>%   |
|---------------|-----------------------|-----------------|----------------|---------------|---------------|
| 1             | 13.230                | 107.917         | 147.610        | 97.09         | 98.06         |
| 2             | 19.232                | 3.234           | 2.914          | 2.91          | 1.94          |
| <b>Total:</b> |                       | <b>111.151</b>  | <b>150.525</b> | <b>100.00</b> | <b>100.00</b> |

### HPLC Spectrum of (±)-7ab

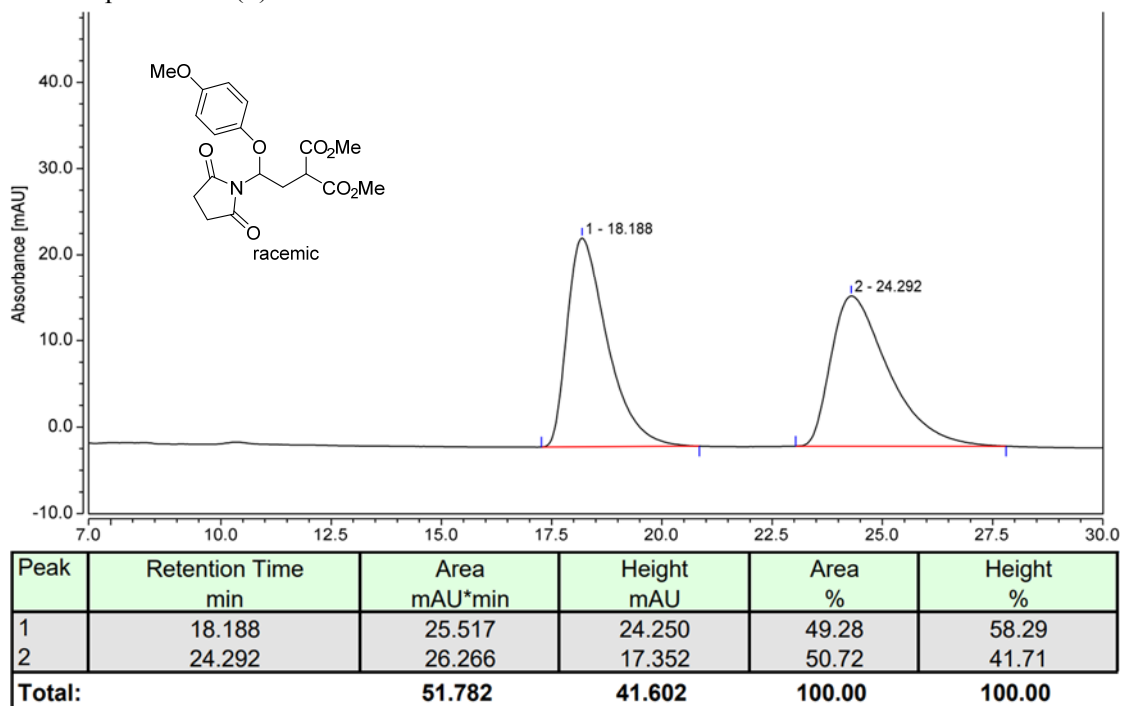

### HPLC Spectrum of (S)-7ab

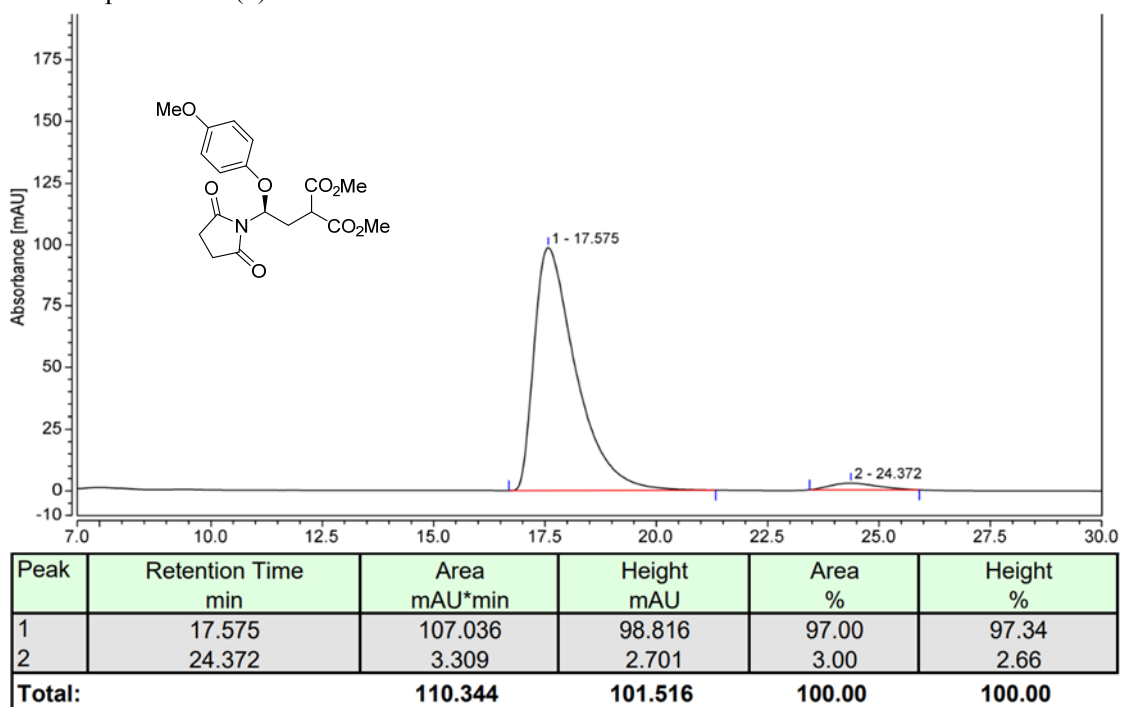

### HPLC Spectrum of (±)-7ac

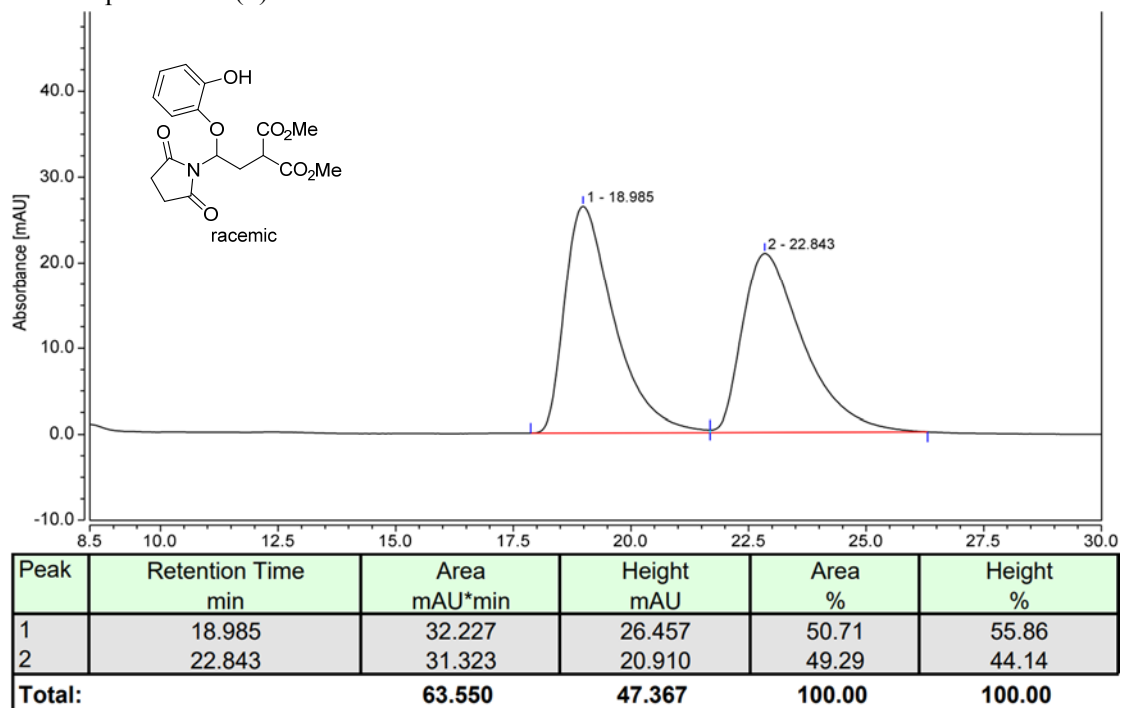

### HPLC Spectrum of (S)-7ac

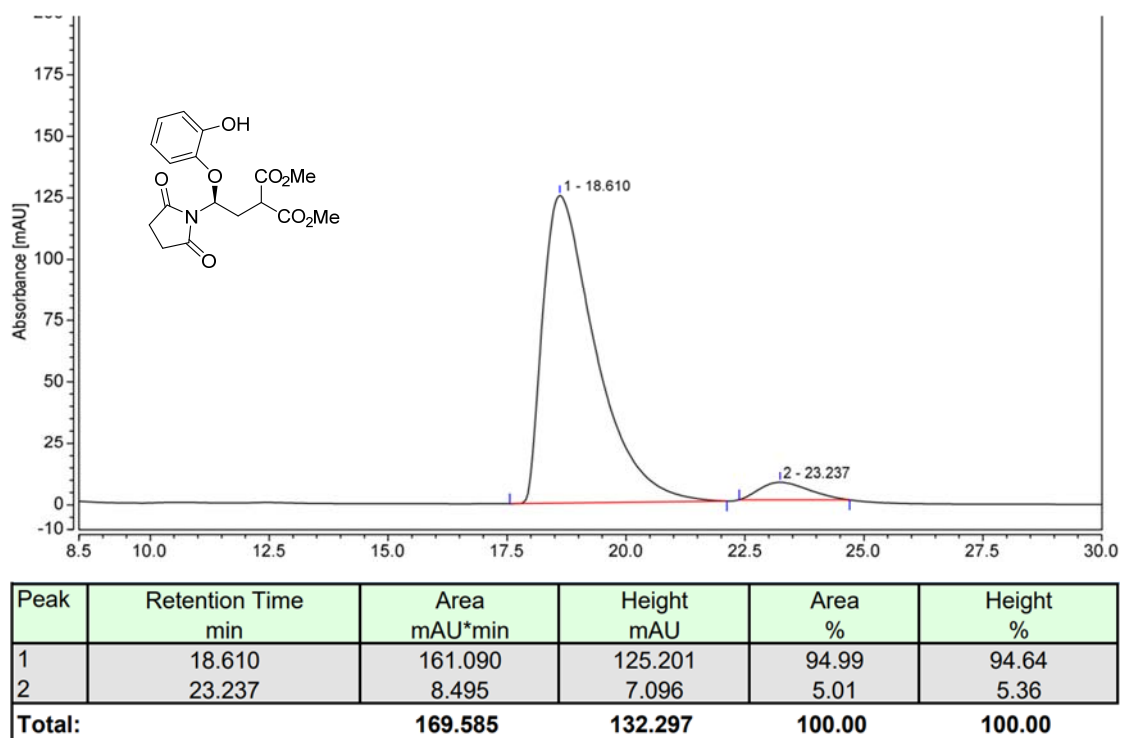

### HPLC Spectrum of (±)-7ad

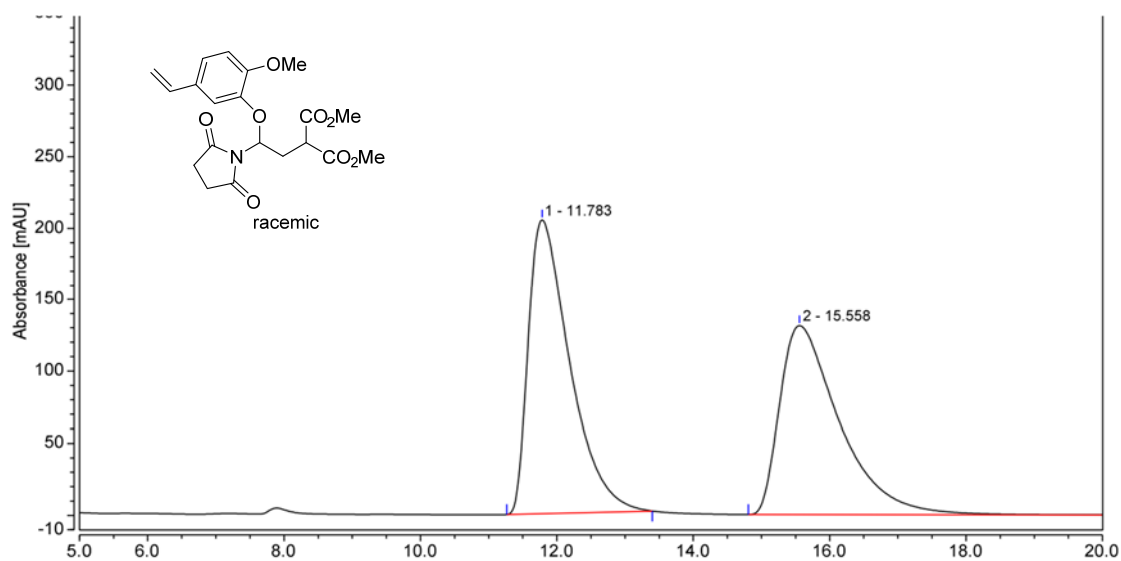

| Peak          | Retention Time<br>min | Area<br>mAU*min | Height<br>mAU  | Area<br>%     | Height<br>%   |
|---------------|-----------------------|-----------------|----------------|---------------|---------------|
| 1             | 11.783                | 143.745         | 204.711        | 51.86         | 60.99         |
| 2             | 15.558                | 133.421         | 130.916        | 48.14         | 39.01         |
| <b>Total:</b> |                       | <b>277.166</b>  | <b>335.627</b> | <b>100.00</b> | <b>100.00</b> |

### HPLC Spectrum of (S)-7ad

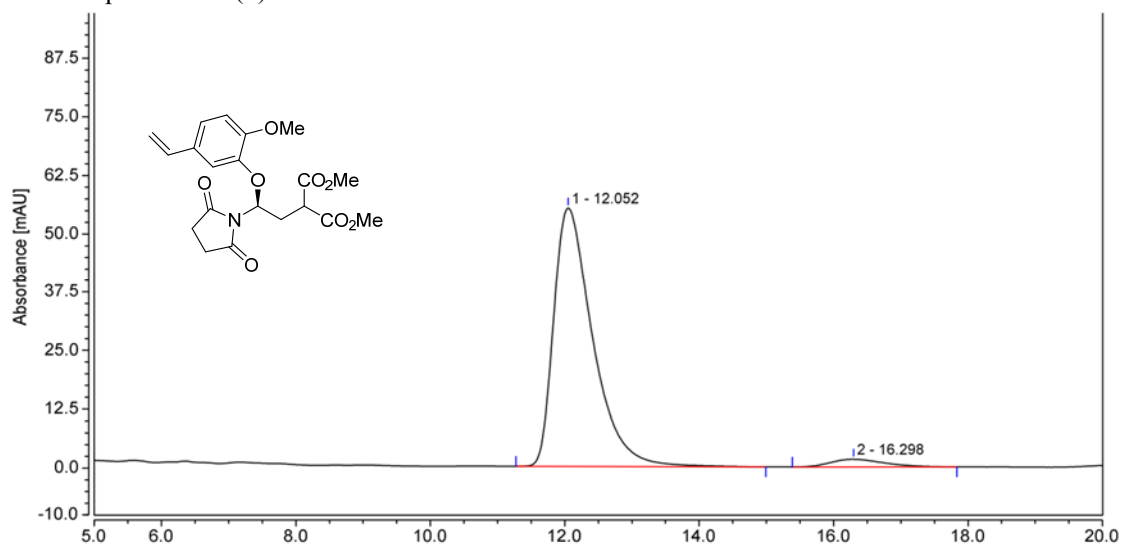

| Peak          | Retention Time<br>min | Area<br>mAU*min | Height<br>mAU | Area<br>%     | Height<br>%   |
|---------------|-----------------------|-----------------|---------------|---------------|---------------|
| 1             | 12.052                | 37.029          | 55.233        | 96.05         | 97.11         |
| 2             | 16.298                | 1.523           | 1.641         | 3.95          | 2.89          |
| <b>Total:</b> |                       | <b>38.552</b>   | <b>56.874</b> | <b>100.00</b> | <b>100.00</b> |

HPLC Spectrum for the mixture of **7ae** and **7ae'**

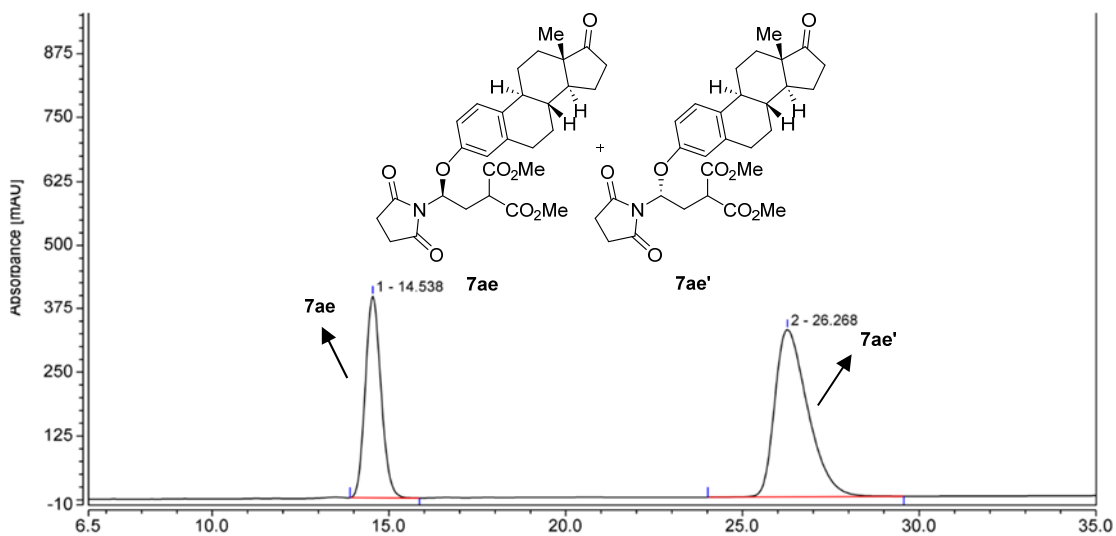

| Peak          | Retention Time min | Area mAU*min   | Height mAU     | Area %        | Height %      |
|---------------|--------------------|----------------|----------------|---------------|---------------|
| 1             | 14.538             | 203.980        | 394.743        | 36.55         | 54.66         |
| 2             | 26.268             | 354.148        | 327.494        | 63.45         | 45.34         |
| <b>Total:</b> |                    | <b>558.127</b> | <b>722.237</b> | <b>100.00</b> | <b>100.00</b> |

HPLC Spectrum of (*S*, 8*R*, 9*S*, 13*S*, 14*S*)-**7ae**

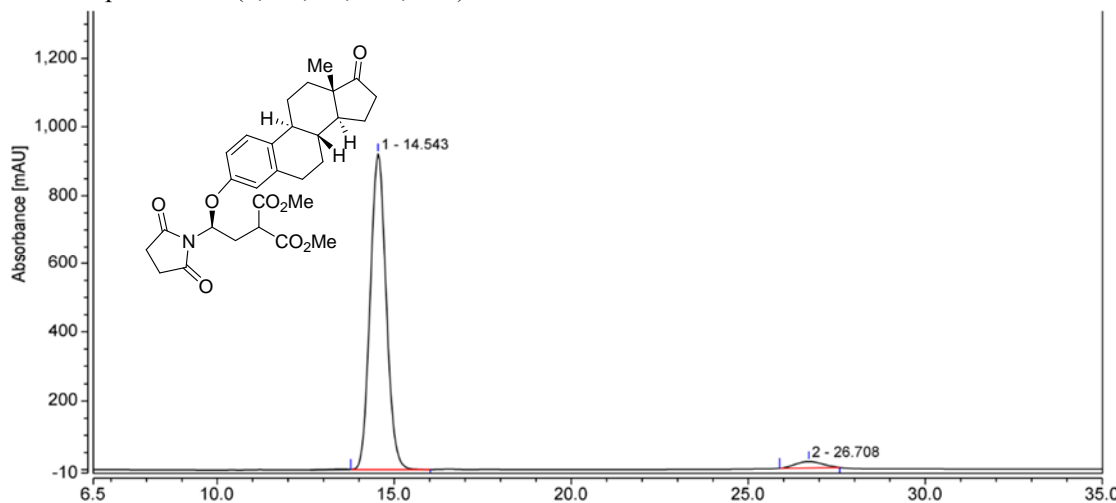

| Peak          | Retention Time min | Area mAU*min   | Height mAU     | Area %        | Height %      |
|---------------|--------------------|----------------|----------------|---------------|---------------|
| 1             | 14.543             | 482.562        | 922.436        | 96.71         | 98.01         |
| 2             | 26.708             | 16.407         | 18.687         | 3.29          | 1.99          |
| <b>Total:</b> |                    | <b>498.969</b> | <b>941.123</b> | <b>100.00</b> | <b>100.00</b> |

HPLC Spectrum of (*R*, 8*R*, 9*S*, 13*S*, 14*S*)-**7ae**'

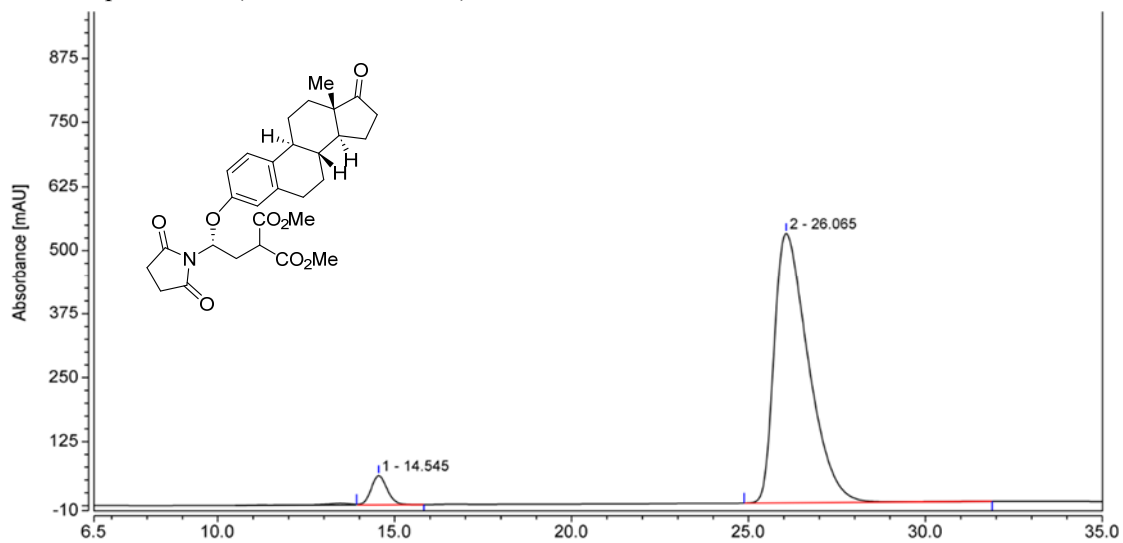

| Peak          | Retention Time<br>min | Area<br>mAU*min | Height<br>mAU  | Area<br>%     | Height<br>%   |
|---------------|-----------------------|-----------------|----------------|---------------|---------------|
| 1             | 14.545                | 29.877          | 57.145         | 4.83          | 9.76          |
| 2             | 26.065                | 588.790         | 528.422        | 95.17         | 90.24         |
| <b>Total:</b> |                       | <b>618.666</b>  | <b>585.567</b> | <b>100.00</b> | <b>100.00</b> |

### HPLC Spectrum of (±)-9aa

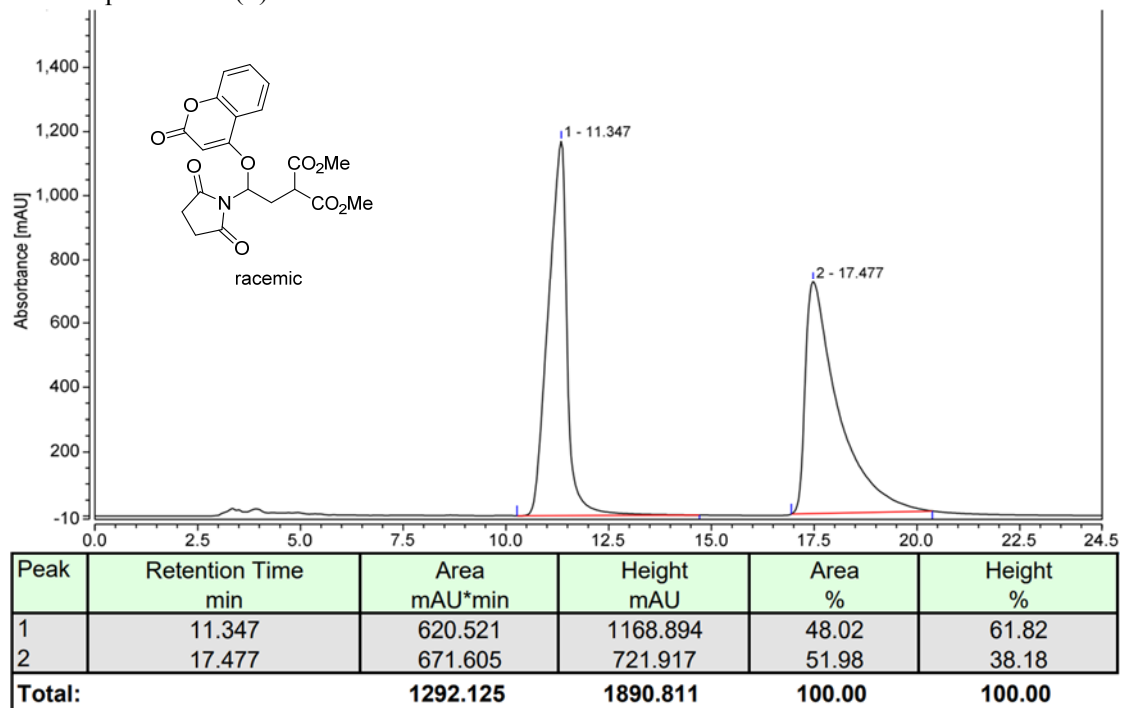

### HPLC Spectrum of (S)-9aa

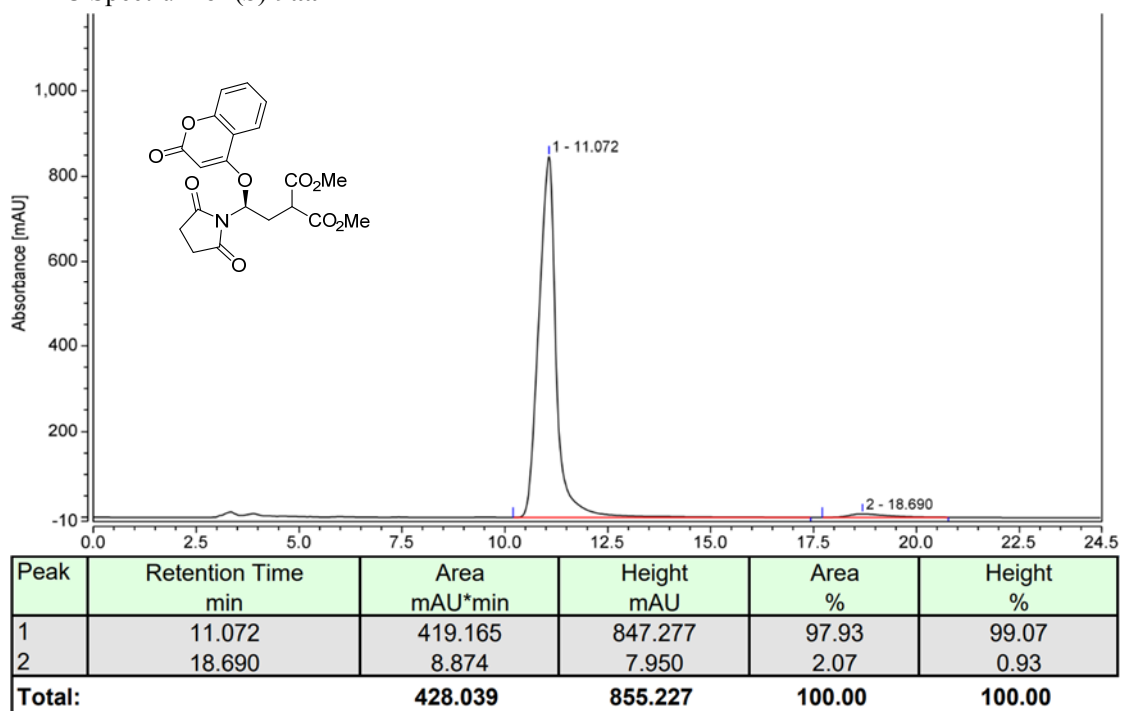

### HPLC Spectrum of (±)-9ab

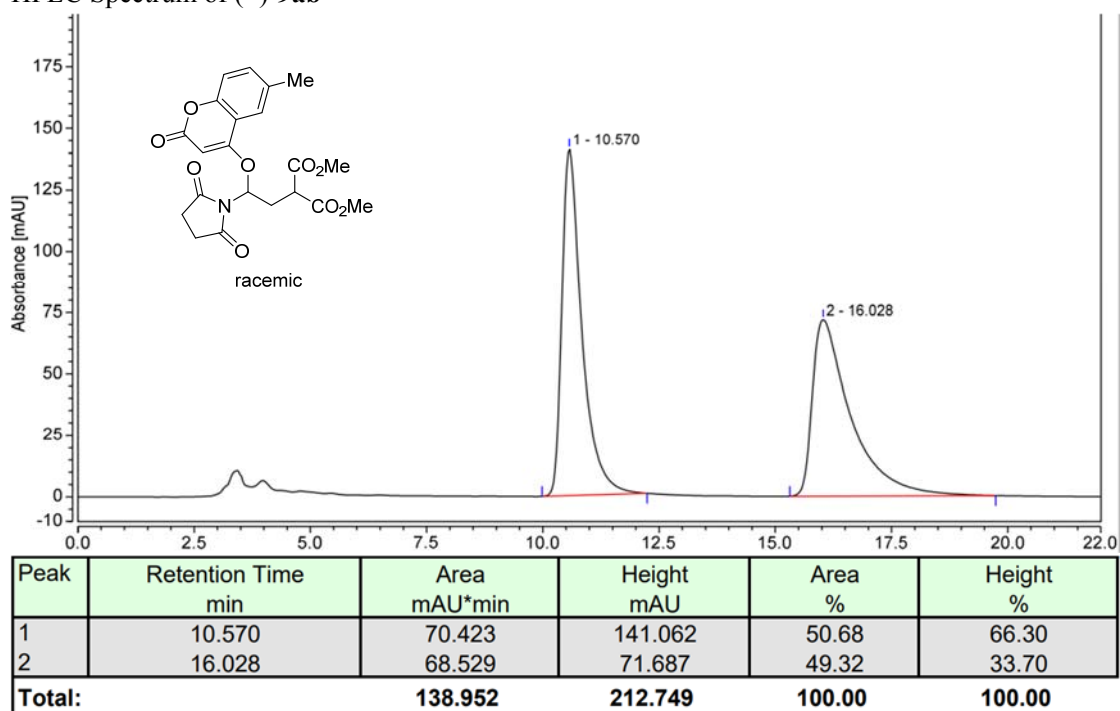

### HPLC Spectrum of (S)-9ab

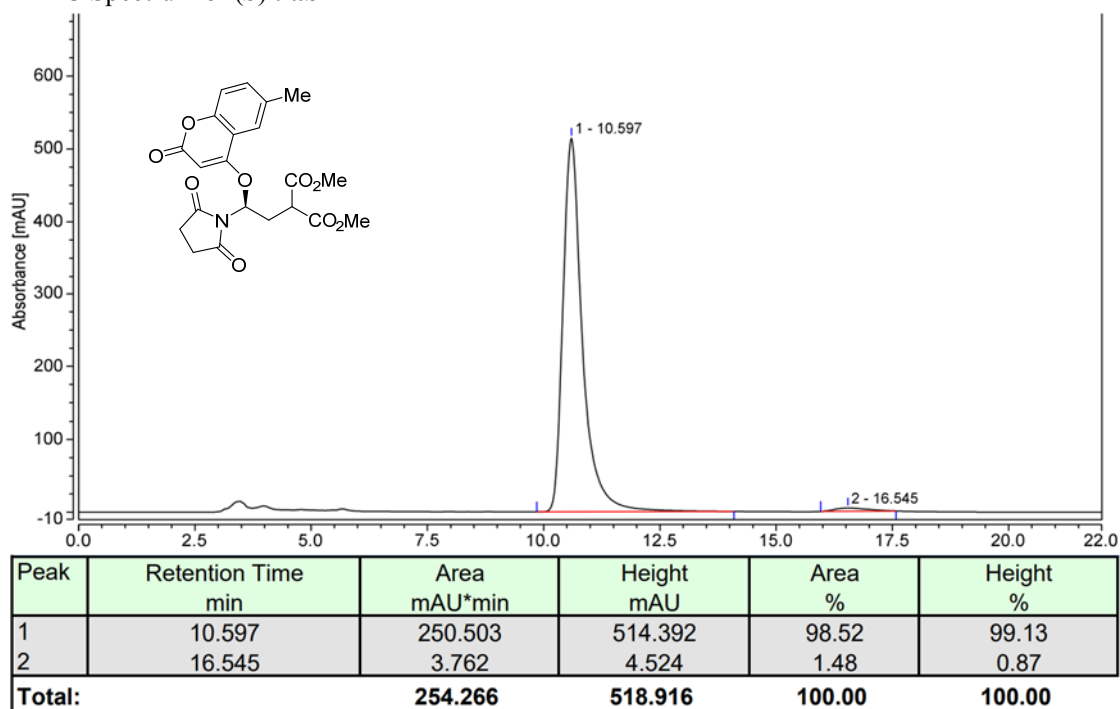



### HPLC Spectrum of (±)-9ac

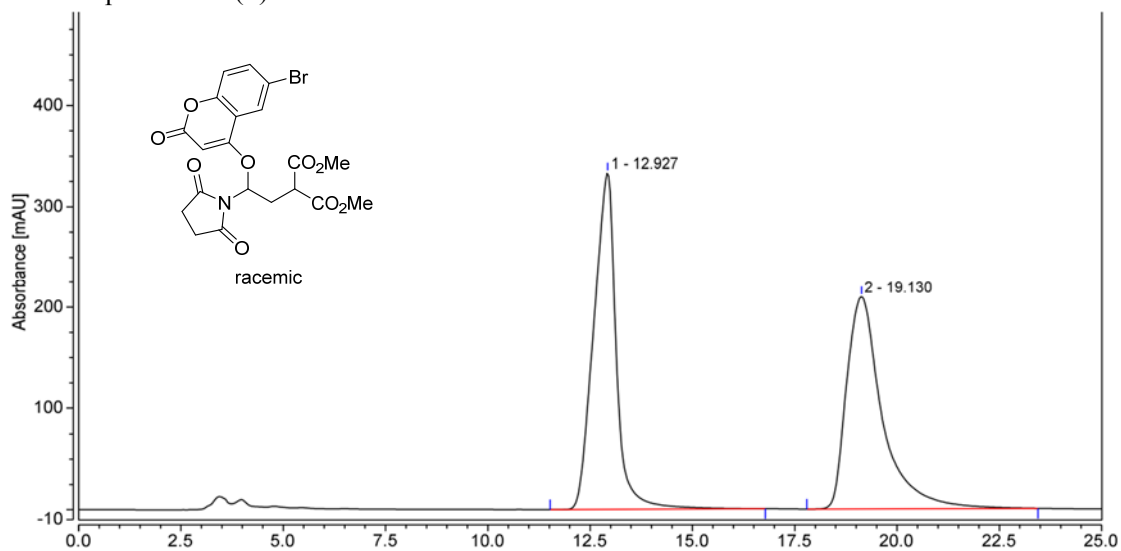

| Peak          | Retention Time<br>min | Area<br>mAU*min | Height<br>mAU  | Area<br>%     | Height<br>%   |
|---------------|-----------------------|-----------------|----------------|---------------|---------------|
| 1             | 12.927                | 212.621         | 333.182        | 50.02         | 61.37         |
| 2             | 19.130                | 212.416         | 209.740        | 49.98         | 38.63         |
| <b>Total:</b> |                       | <b>425.038</b>  | <b>542.922</b> | <b>100.00</b> | <b>100.00</b> |

### HPLC Spectrum of (S)-9ac

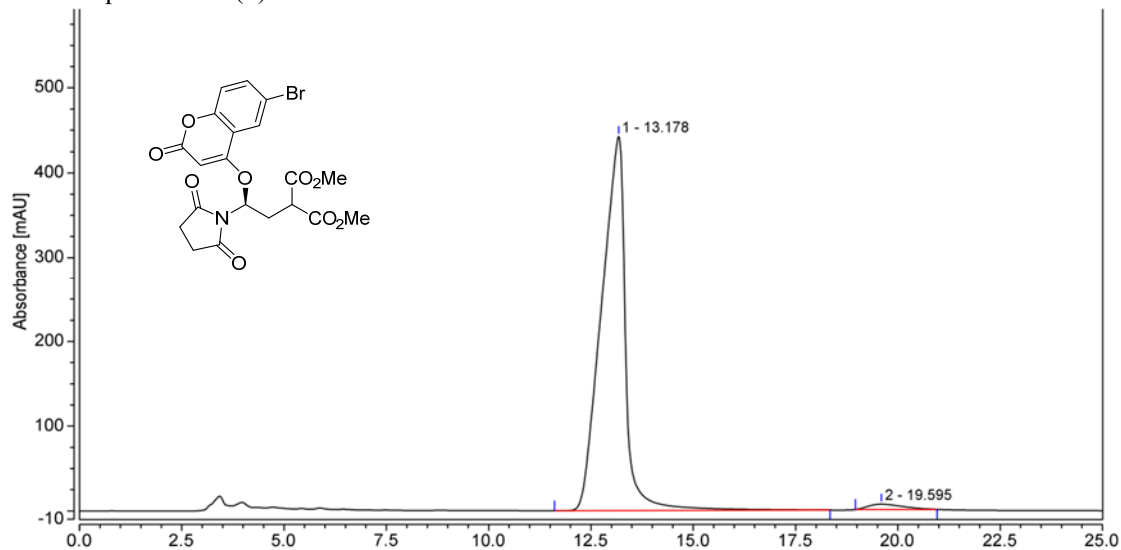

| Peak          | Retention Time<br>min | Area<br>mAU*min | Height<br>mAU  | Area<br>%     | Height<br>%   |
|---------------|-----------------------|-----------------|----------------|---------------|---------------|
| 1             | 13.178                | 302.011         | 442.195        | 98.00         | 98.60         |
| 2             | 19.595                | 6.152           | 6.269          | 2.00          | 1.40          |
| <b>Total:</b> |                       | <b>308.163</b>  | <b>448.464</b> | <b>100.00</b> | <b>100.00</b> |

### HPLC Spectrum of (±)-11aa

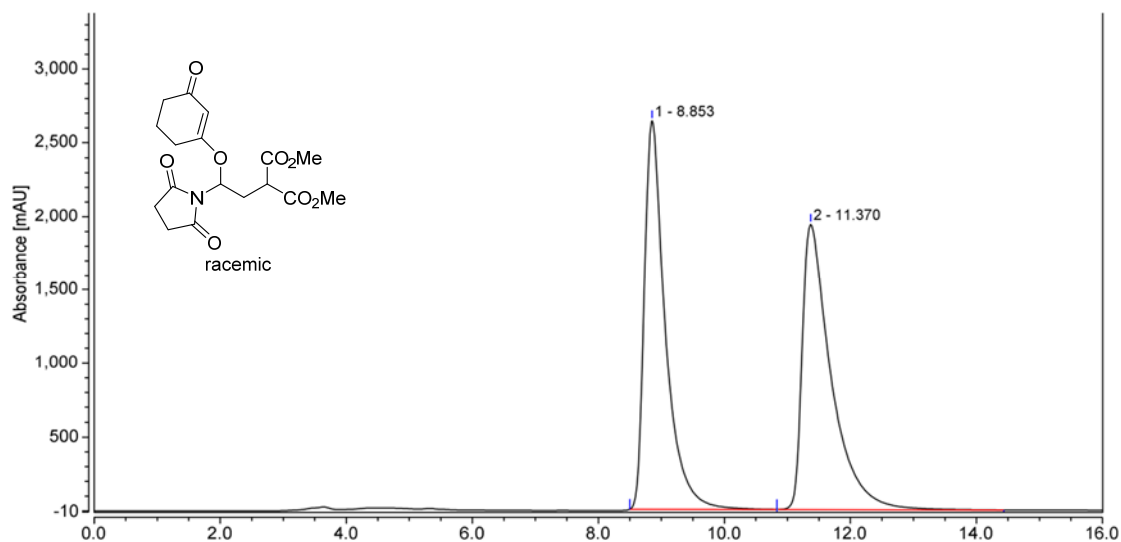

| Peak          | Retention Time<br>min | Area<br>mAU*min | Height<br>mAU   | Area<br>%     | Height<br>%   |
|---------------|-----------------------|-----------------|-----------------|---------------|---------------|
| 1             | 8.853                 | 1019.754        | 2639.118        | 49.84         | 57.61         |
| 2             | 11.370                | 1026.428        | 1942.203        | 50.16         | 42.39         |
| <b>Total:</b> |                       | <b>2046.182</b> | <b>4581.321</b> | <b>100.00</b> | <b>100.00</b> |

### HPLC Spectrum of (*S*)-11aa

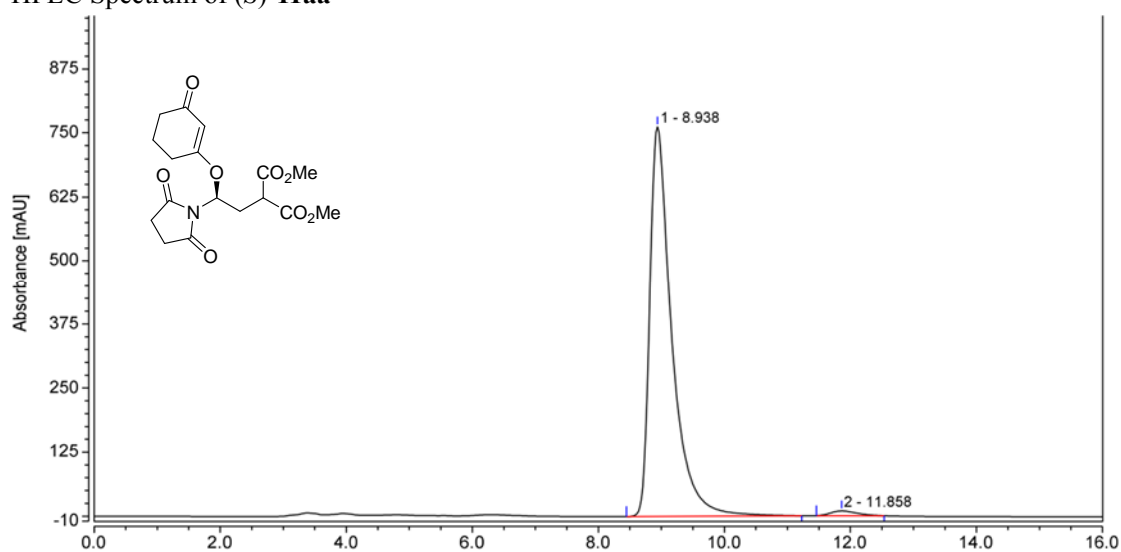

| Peak          | Retention Time<br>min | Area<br>mAU*min | Height<br>mAU  | Area<br>%     | Height<br>%   |
|---------------|-----------------------|-----------------|----------------|---------------|---------------|
| 1             | 8.938                 | 308.408         | 762.208        | 98.56         | 98.80         |
| 2             | 11.858                | 4.510           | 9.266          | 1.44          | 1.20          |
| <b>Total:</b> |                       | <b>312.918</b>  | <b>771.473</b> | <b>100.00</b> | <b>100.00</b> |

### HPLC Spectrum of (±)-11ab

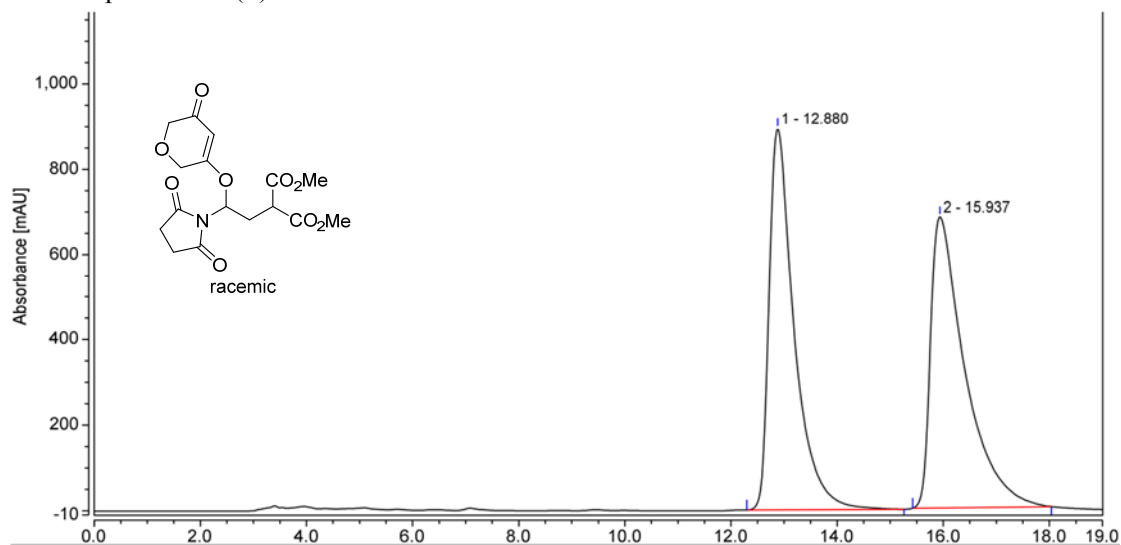

| Peak          | Retention Time<br>min | Area<br>mAU*min | Height<br>mAU   | Area<br>%     | Height<br>%   |
|---------------|-----------------------|-----------------|-----------------|---------------|---------------|
| 1             | 12.880                | 488.988         | 893.640         | 49.08         | 56.70         |
| 2             | 15.937                | 507.310         | 682.472         | 50.92         | 43.30         |
| <b>Total:</b> |                       | <b>996.298</b>  | <b>1576.111</b> | <b>100.00</b> | <b>100.00</b> |

### HPLC Spectrum of (S)-11ab

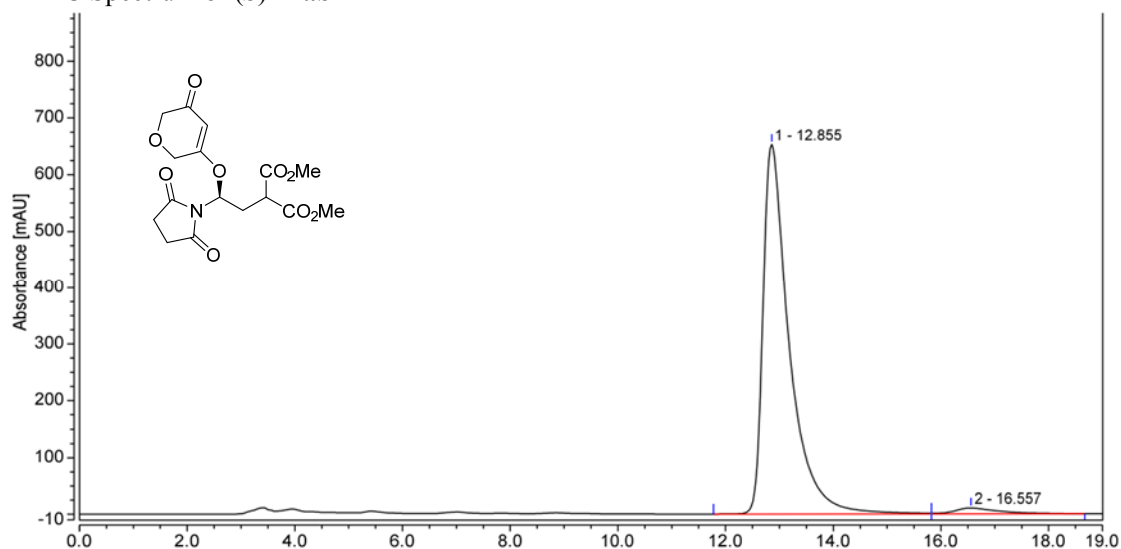

| Peak          | Retention Time<br>min | Area<br>mAU*min | Height<br>mAU  | Area<br>%     | Height<br>%   |
|---------------|-----------------------|-----------------|----------------|---------------|---------------|
| 1             | 12.855                | 369.023         | 652.972        | 97.32         | 98.43         |
| 2             | 16.557                | 10.146          | 10.402         | 2.68          | 1.57          |
| <b>Total:</b> |                       | <b>379.169</b>  | <b>663.374</b> | <b>100.00</b> | <b>100.00</b> |

### HPLC Spectrum of (±)-11ac

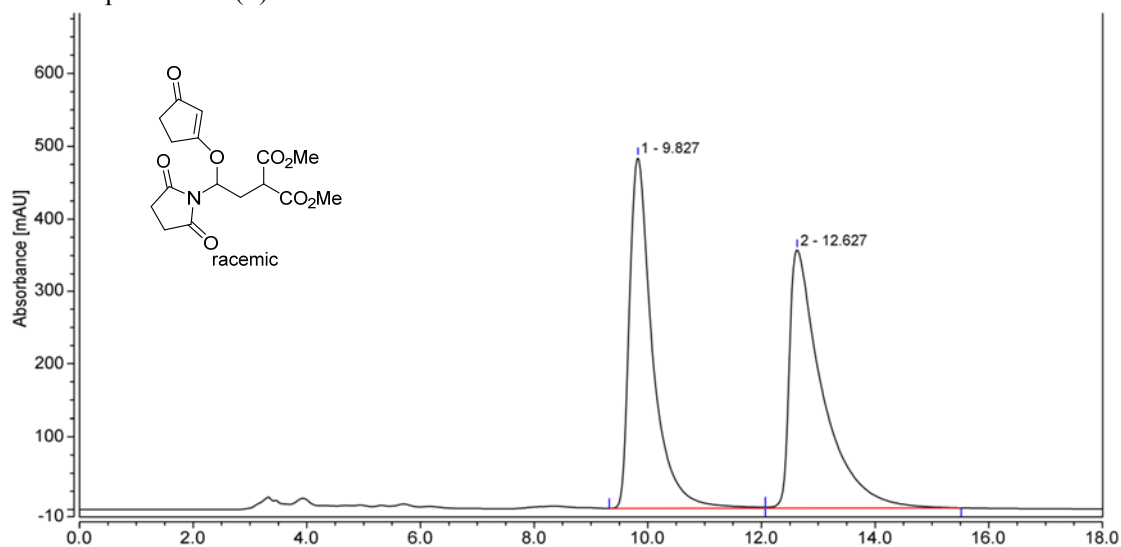

| Peak          | Retention Time<br>min | Area<br>mAU*min | Height<br>mAU  | Area<br>%     | Height<br>%   |
|---------------|-----------------------|-----------------|----------------|---------------|---------------|
| 1             | 9.827                 | 227.389         | 483.129        | 48.88         | 57.55         |
| 2             | 12.627                | 237.815         | 356.436        | 51.12         | 42.45         |
| <b>Total:</b> |                       | <b>465.205</b>  | <b>839.565</b> | <b>100.00</b> | <b>100.00</b> |

### HPLC Spectrum of (S)-11ac

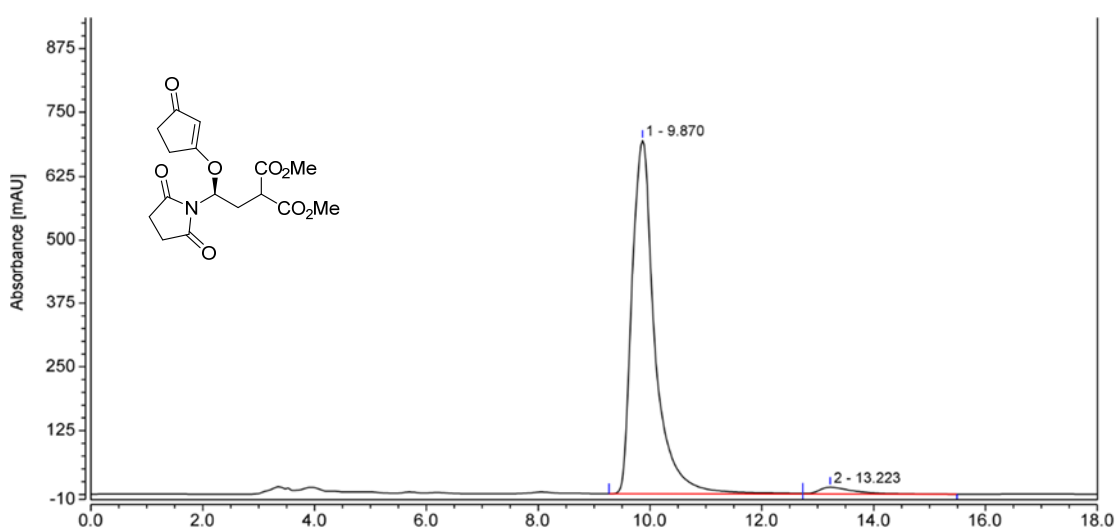

| Peak          | Retention Time<br>min | Area<br>mAU*min | Height<br>mAU  | Area<br>%     | Height<br>%   |
|---------------|-----------------------|-----------------|----------------|---------------|---------------|
| 1             | 9.870                 | 329.273         | 693.753        | 97.08         | 98.10         |
| 2             | 13.223                | 9.897           | 13.456         | 2.92          | 1.90          |
| <b>Total:</b> |                       | <b>339.170</b>  | <b>707.209</b> | <b>100.00</b> | <b>100.00</b> |

### HPLC Spectrum of (±)-12aa

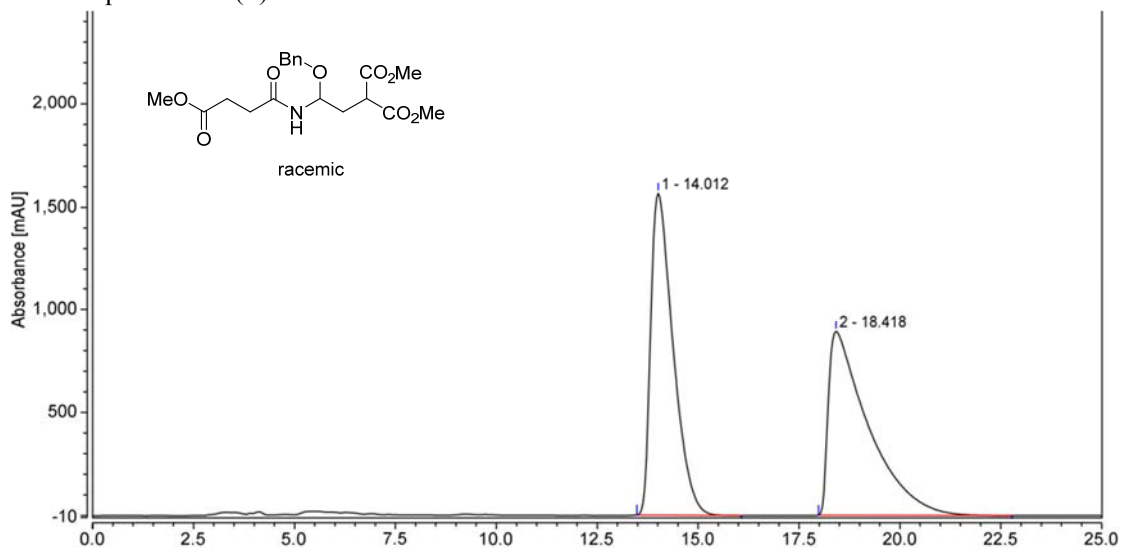

| Peak          | Retention Time<br>min | Area<br>mAU*min | Height<br>mAU   | Area<br>%     | Height<br>%   |
|---------------|-----------------------|-----------------|-----------------|---------------|---------------|
| 1             | 14.012                | 1004.415        | 1566.749        | 49.54         | 63.73         |
| 2             | 18.418                | 1023.112        | 891.822         | 50.46         | 36.27         |
| <b>Total:</b> |                       | <b>2027.527</b> | <b>2458.571</b> | <b>100.00</b> | <b>100.00</b> |

### HPLC Spectrum of (S)-12aa

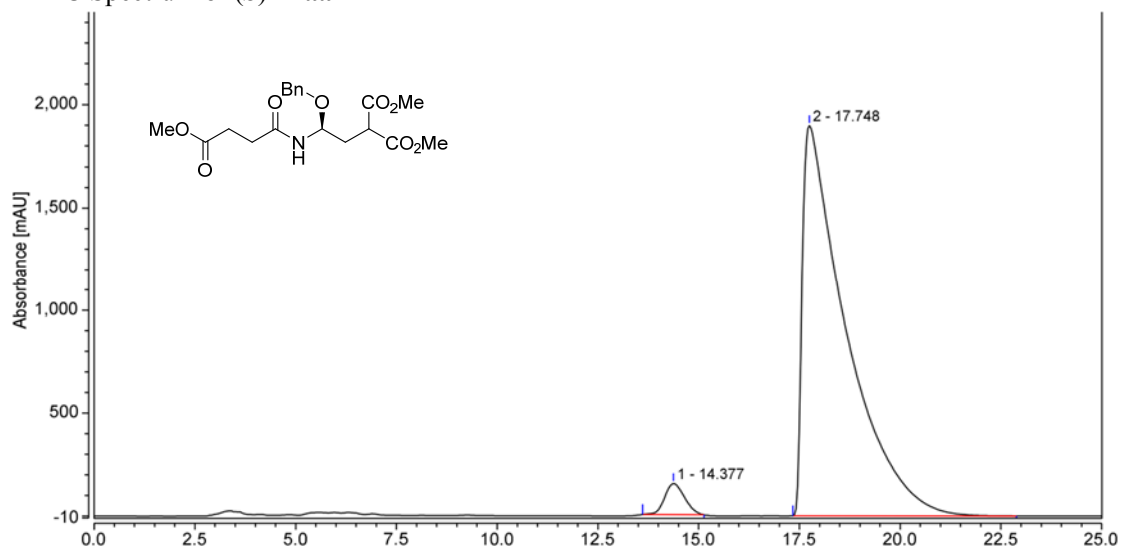

| Peak          | Retention Time<br>min | Area<br>mAU*min | Height<br>mAU   | Area<br>%     | Height<br>%   |
|---------------|-----------------------|-----------------|-----------------|---------------|---------------|
| 1             | 14.377                | 86.179          | 150.522         | 3.50          | 7.35          |
| 2             | 17.748                | 2376.056        | 1896.139        | 96.50         | 92.65         |
| <b>Total:</b> |                       | <b>2462.235</b> | <b>2046.661</b> | <b>100.00</b> | <b>100.00</b> |

### HPLC Spectrum of (±)-13aa

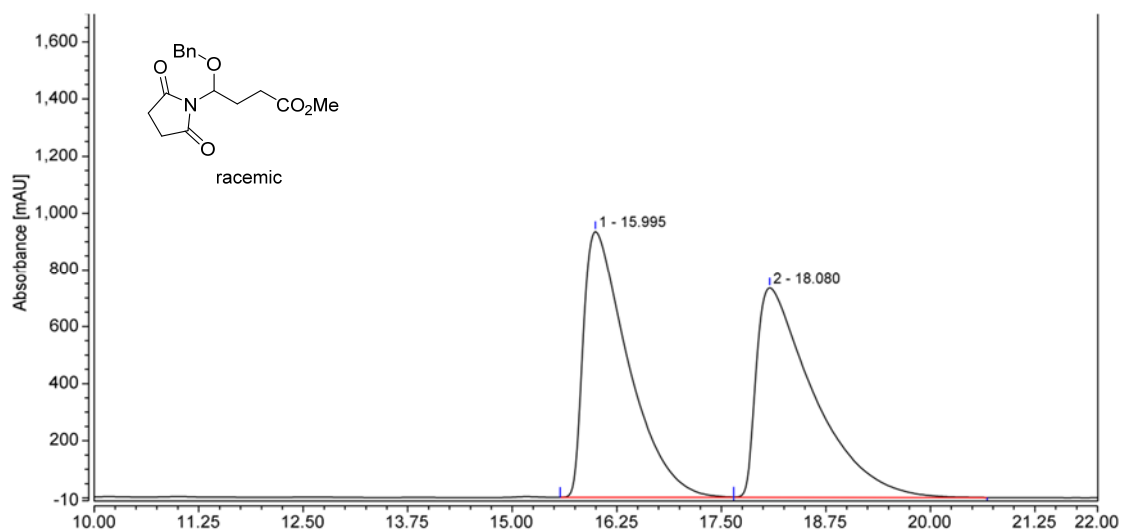

| Peak          | Retention Time<br>min | Area<br>mAU*min | Height<br>mAU   | Area<br>%     | Height<br>%   |
|---------------|-----------------------|-----------------|-----------------|---------------|---------------|
| 1             | 15.995                | 580.862         | 933.844         | 49.91         | 56.02         |
| 2             | 18.080                | 582.934         | 733.016         | 50.09         | 43.98         |
| <b>Total:</b> |                       | <b>1163.796</b> | <b>1666.860</b> | <b>100.00</b> | <b>100.00</b> |

### HPLC Spectrum of (S)-13aa

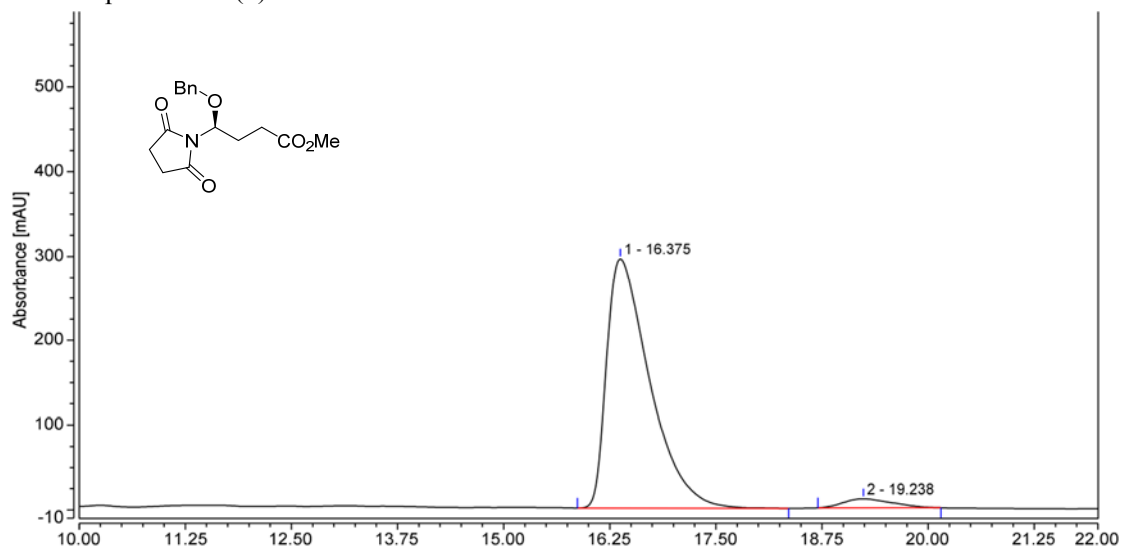

| Peak          | Retention Time<br>min | Area<br>mAU*min | Height<br>mAU  | Area<br>%     | Height<br>%   |
|---------------|-----------------------|-----------------|----------------|---------------|---------------|
| 1             | 16.375                | 173.541         | 295.318        | 96.07         | 96.52         |
| 2             | 19.238                | 7.105           | 10.655         | 3.93          | 3.48          |
| <b>Total:</b> |                       | <b>180.646</b>  | <b>305.973</b> | <b>100.00</b> | <b>100.00</b> |

### HPLC Spectrum of (±)-14aa

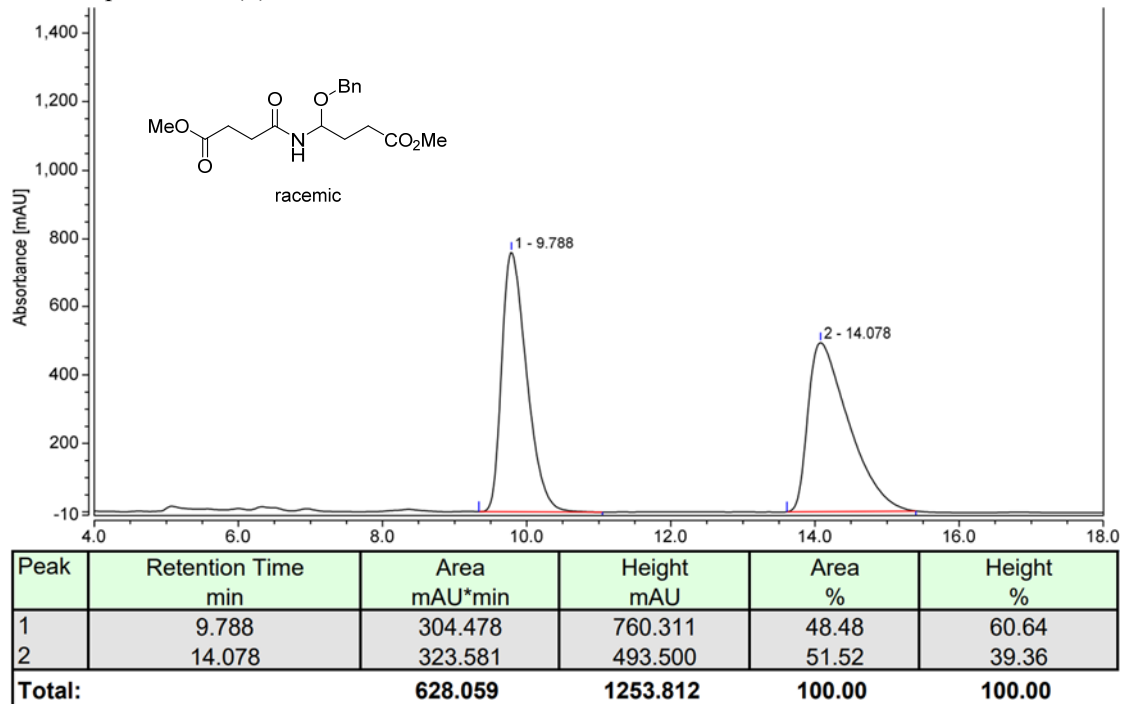

### HPLC Spectrum of (S)-14aa

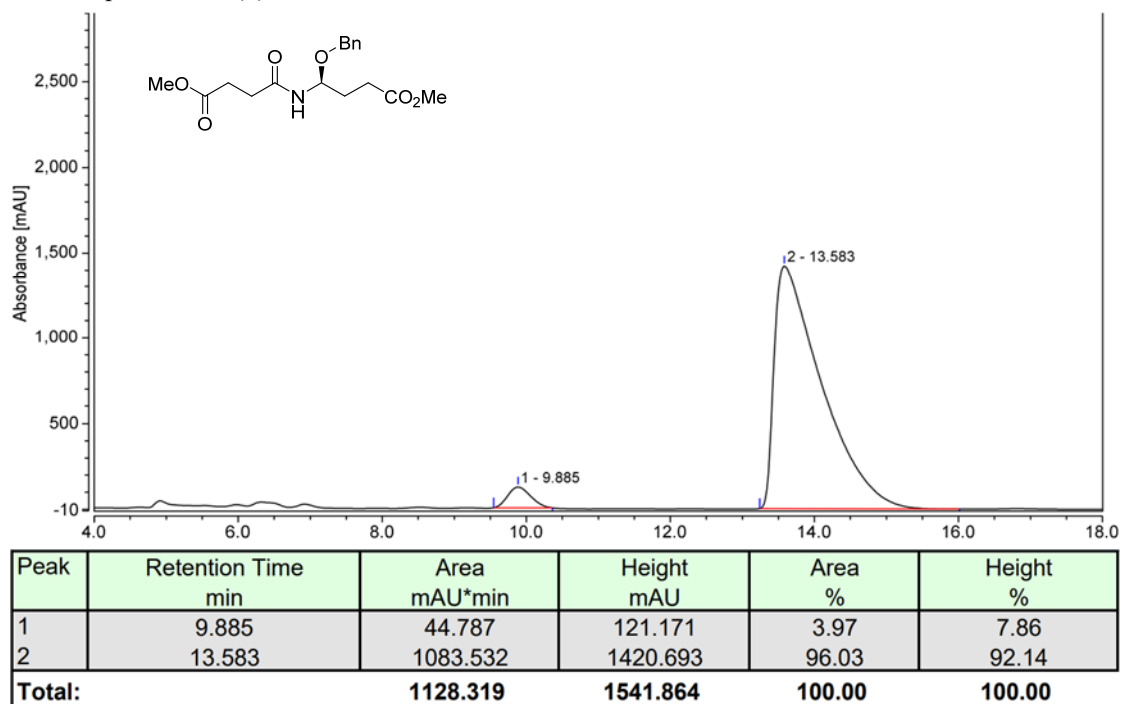

### HPLC Spectrum of (±)-15aa

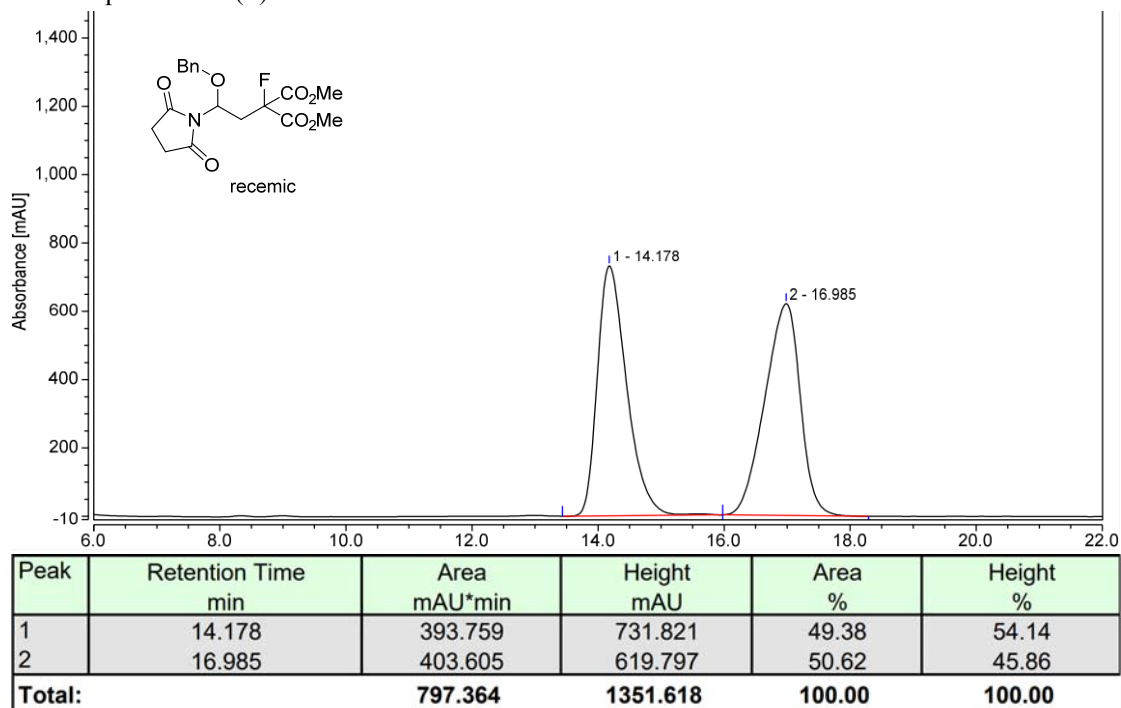

### HPLC Spectrum of (S)-15aa

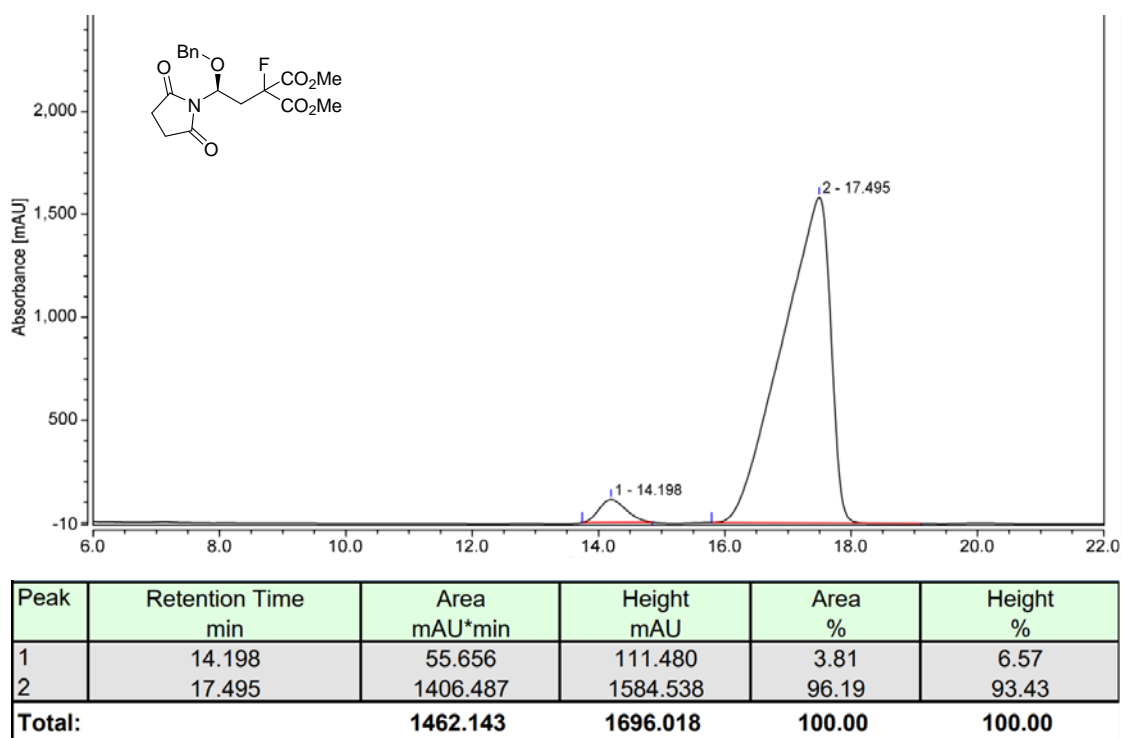



HPLC Spectrum of (±)-16aa from (±)-12aa

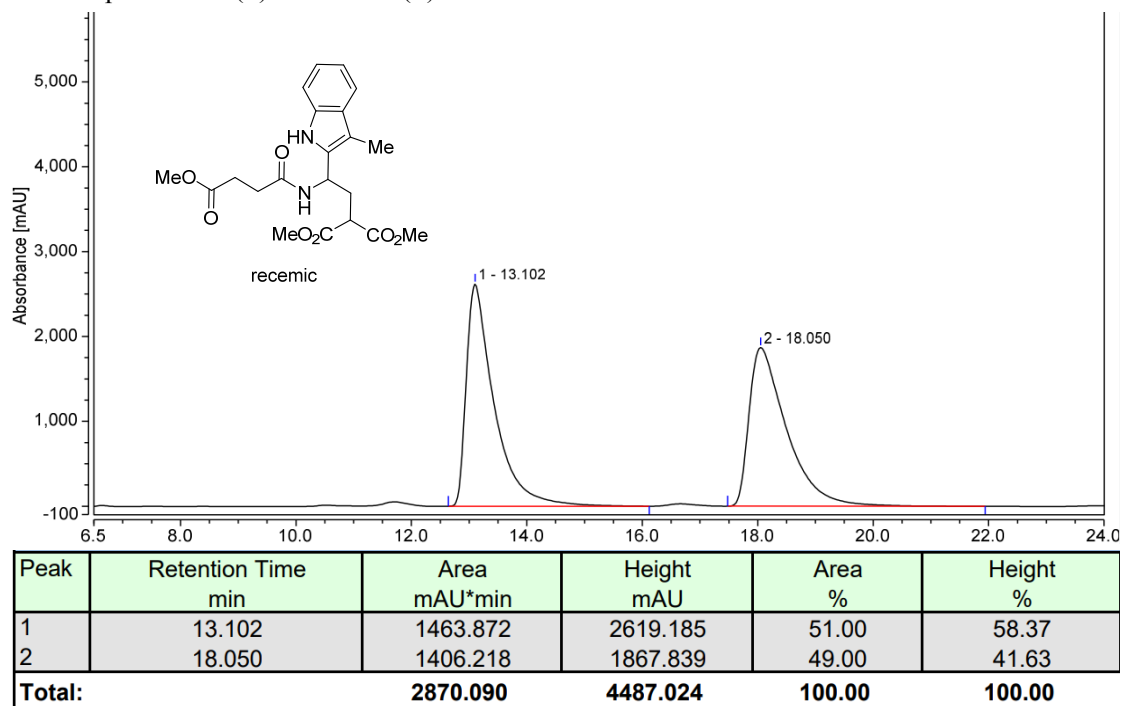

HPLC Spectrum of (±)-16aa from (*S*)-12aa (92% ee)

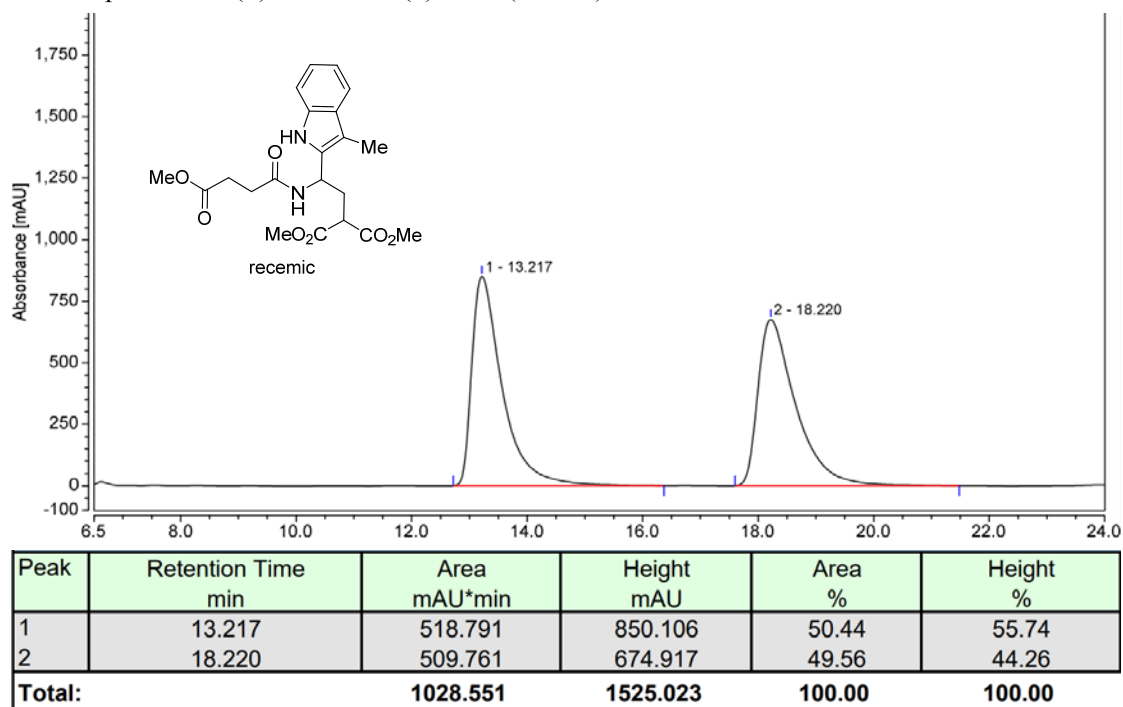

HPLC Spectrum of (±)-17aa from (±)-12aa

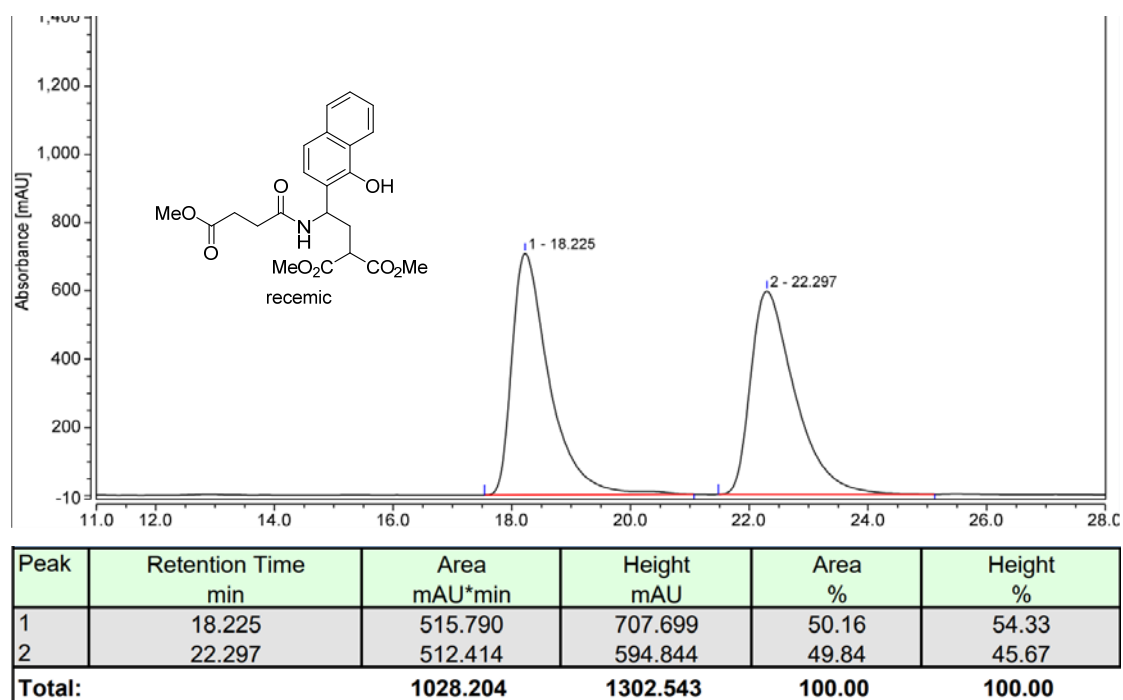

HPLC Spectrum of (±)-17aa from (*S*)-12aa (92% ee)

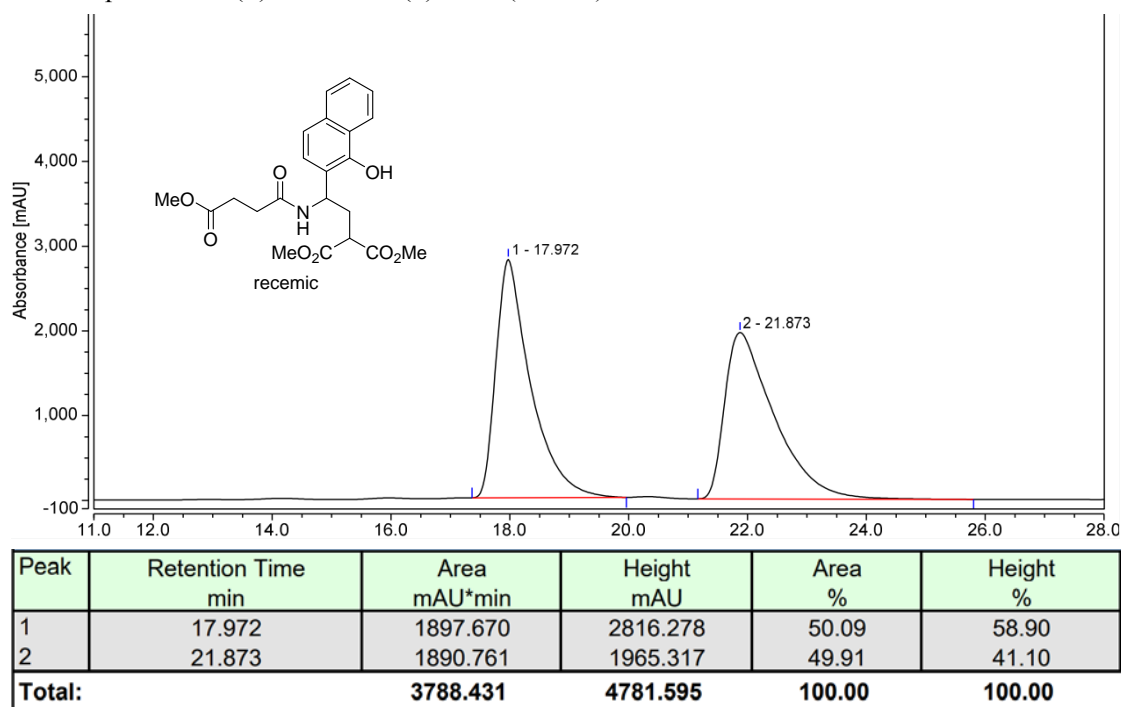

## References

- 1 H.-X. Wang, C. Yang, B.-Y. Xue, M.-S. Xie, Y. Tian, C. Peng and H.-M. Guo, Design of  $C_1$ -symmetric tridentate ligands for enantioselective dearomative [3 + 2] annulation of indoles with aminocyclopropanes, *Nat. Commun.*, 2023, **14**, 2270.
- 2 X.-Y. Wang, X.-B. Wang, Y. Tian, C. Peng, M.-S. Xie and H.-M. Guo, Cobalt-Catalyzed Asymmetric Dearomative [3 + 2] Annulation of Quinolines, Isoquinolines, and Pyridines, *ACS Catal.*, 2023, **13**, 11528-11540.
- 3 Y.-P. Wang, X.-P. Zhang, M.-S. Xie and H.-M. Guo, Cobalt(II)-Catalyzed Enantioselective Propargyl Claisen Rearrangement: Access to Allenyl-Substituted Quaternary  $\beta$ -Ketoesters, *Org. Lett.*, 2023, **25**, 7105-7109.
- 4 J. Preindl, S. Chakrabarty and J. Waser, Dearomatization of electron poor six-membered *N*-heterocycles through [3 + 2] annulation with aminocyclopropanes, *Chem. Sci.*, 2017, **8**, 7112-7118.
- 5 F. de Nanteuil, J. Loup and J. Waser, Catalytic Friedel-Crafts reaction of aminocyclopropanes, *Org. Lett.*, 2013, **15**, 3738-3741.
- 6 M.-C. Zhang, D.-C. Wang, M.-S. Xie, G.-R. Qu, H.-M. Guo and S.-L. You, Cu-catalyzed asymmetric dearomative [3 + 2] cycloaddition reaction of benzazoles with aminocyclopropanes, *Chem*, 2019, **5**, 156-167.
- 7 H.-X. Wang, W.-P. Li, M.-M. Zhang, M.-S. Xie, G.-R. Qu and H.-M. Guo, Synthesis of chiral pyrimidine-substituted diester D–A cyclopropanes *via* asymmetric cyclopropanation of phenyliodonium ylides, *Chem. Commun.*, 2020, **56**, 11649-11652.
